# Supplementary material
Source: HighWire-hosted journal article supplement (https://gut.bmj.com/content/gutjnl-2019-319919)
Supplement: inline-supplementary-material-5 [file inline-supplementary-material-5.xlsx]

## Sheet: adult vs embr mouse DEG
MOUSE
DEG = Differentially expressed genes
Adjusted p-value < 0.05, fold change cut-off is 2 fold.
	DEG between adult murine gastric and proximal intestinal organoids																									DEG between embryonic murine gastric and proximal intestinal organoids
	Analzyed			Raw data: Read counts of sequencing																						Analzyed			Raw data: Read counts of sequencing
Gene	log2FoldChange	lfcSE	padj	Corp_org_1	Corp_org_2	Corp_org_3	Pyl_org_1	Pyl_org_2	Pyl_org_3	Duod_org_1	Duod_org_2	Duod_org_3	Jej_org_1	Jej_org_2	Jej_org_3	Ileum_org_1	Ileum_org_2	Ileum_org_3	Colon_org_1	Colon_org_2	Colon_org_3				Gene	log2FoldChange	lfcSE	padj	Corp_org_1	Corp_org_2	Corp_org_3	Pyl_org_1	Pyl_org_2	Pyl_org_3	Duod_org_1	Duod_org_2	Duod_org_3	Jej_org_1	Jej_org_2	Jej_org_3	Ileum_org_1	Ileum_org_2	Ileum_org_3	Colon_org_1	Colon_org_2	Colon_org_3	Embr_sto_org_1	Embr_sto_org_2	Embr_prox_int_org_1
Ush1c	-10.1348	0.401204	1.52871e-116	8	1	0	10	0	0	6743	7515	7826	7499	7618	8079	5203	4721	8549	7628	7230	6968				Cdx1	-9.27209	0.424813	5.77411e-76	0	0	0	1	0	0	4454	4915	5015	3701	4437	5177	3869	4354	6302	7364	6734	6209	1	8	6625
Aldh1b1	-8.4775	0.347927	8.6012e-110	25	20	41	21	53	37	25230	27964	27300	19543	21158	25645	8944	12979	19674	3969	4988	5438				Aldh1b1	-7.93833	0.411866	5.42821e-71	25	20	41	21	53	37	25230	27964	27300	19543	21158	25645	8944	12979	19674	3969	4988	5438	26	87	31831
Fcgbp	-6.9968	0.310051	8.57924e-94	106	109	91	46	42	68	57479	54463	52487	25594	30583	30678	9363	15501	37992	9374	7822	7635				B4galnt2	-7.85064	0.434845	4.50081e-61	0	0	1	2	0	0	13293	15010	14533	14597	14231	14383	4486	4819	16632	7214	10423	11379	12	12	13323
Tm4sf4	-10.7976	0.521987	1.27729e-70	4	5	0	0	1	0	4595	5851	5154	5550	6221	3962	6652	4614	6058	61	29	41				Eya2	9.11949	0.525311	7.56042e-53	4379	5664	4415	4268	4667	5485	6	8	7	11	13	2	21	20	29	81	200	77	6506	6751	13
Enah	7.36671	0.37369	3.45059e-66	4860	4568	5288	5188	5824	5543	2	13	9	5	10	11	90	75	14	9	11	18				Vipr1	-7.16194	0.44756	1.96264e-48	17	25	30	47	33	9	5807	5805	6144	5969	6636	6728	2987	3821	5402	9844	7842	6581	13	28	6240
Gm1123	-9.0713	0.459607	1.54389e-64	4	2	1	0	2	0	5496	4976	4293	3749	3431	3639	2035	3160	9023	13	18	16				Myrfl	-8.5472	0.501616	1.12817e-46	2	2	0	0	0	0	3943	3823	3833	3051	3525	3614	2014	2338	3997	5	5	1	0	7	3618
AC133488.1	-5.0428	0.290929	2.52879e-60	20	20	14	16	13	23	538	379	406	371	462	453	613	655	373	255	205	255				Tm4sf4	-9.50859	0.570565	2.73069e-46	4	5	0	0	1	0	4595	5851	5154	5550	6221	3962	6652	4614	6058	61	29	41	4	4	4324
Far2	-9.04175	0.488555	1.78173e-59	1	4	2	8	0	1	5783	4844	4611	3013	3223	4068	955	1919	2424	9	18	4				Otc	-7.20785	0.468685	7.10435e-42	0	0	0	0	0	0	7315	6956	6534	3474	3633	4338	418	915	3074	17	33	18	2	9	4745
Tle4	-4.14092	0.245014	9.16618e-58	142	131	171	175	273	168	1979	1780	1916	1754	1878	1930	2090	2291	1229	2314	1694	1471				Fcgbp	-5.35688	0.359219	9.36524e-42	106	109	91	46	42	68	57479	54463	52487	25594	30583	30678	9363	15501	37992	9374	7822	7635	528	296	69840
Cldn18	11.5356	0.530392	4.94104e-56	33788	35610	22993	30090	38513	32128	5	12	2	3	2	3	7	12	2	4	1	3				9130208D14Rik	-8.46485	0.54428	1.13435e-41	0	0	1	0	0	0	19741	19085	27255	7109	7876	11008	2371	4146	9641	5114	4161	4331	4	16	14829
Cdx1	-11.5092	0.561731	2.80057e-53	0	0	0	1	0	0	4454	4915	5015	3701	4437	5177	3869	4354	6302	7364	6734	6209				Plcl2	-5.22087	0.360969	3.8646e-41	17	3	0	4	12	0	1632	1732	1648	889	906	1097	827	1113	1614	2051	1744	1826	16	23	1648
Prkg2	-9.659	0.533086	8.1098e-53	3	5	2	0	2	2	3168	3699	3522	5767	4995	5422	2430	2758	4299	1373	1512	1903				Akt3	8.02682	0.531161	2.70629e-36	1274	1066	1538	727	1068	1095	2	3	4	2	2	1	7	3	9	9	11	13	1623	1449	9
Mlxipl	-6.39352	0.372504	2.05315e-51	52	64	65	91	41	33	13889	12508	16494	8900	10367	11941	1974	3352	5771	1258	945	760				Aoc1	-7.63564	0.537389	2.34017e-35	0	1	0	0	0	0	5551	5806	5706	6097	7207	7206	1342	1735	4690	8470	5947	3837	3	11	4773
Fut2	5.93351	0.361133	6.00292e-51	5173	5742	5164	5188	4182	5484	202	237	218	97	110	85	333	304	562	1052	1176	1361				Ush1c	-10.0937	0.555537	3.02425e-35	8	1	0	10	0	0	6743	7515	7826	7499	7618	8079	5203	4721	8549	7628	7230	6968	0	3	7963
Vipr1	-7.16735	0.417056	2.47769e-50	17	25	30	47	33	9	5807	5805	6144	5969	6636	6728	2987	3821	5402	9844	7842	6581				Aqp5	11.3758	0.658115	9.14457e-35	49559	45735	96068	80780	87325	90704	40	87	43	24	28	38	7	6	1	0	1	0	21750	36663	2
Gngt2	-6.55685	0.399219	3.00944e-50	2	3	2	8	0	0	516	626	554	407	429	389	515	527	805	292	231	269				Naip1	-7.31605	0.541316	3.36631e-34	5	16	8	44	22	11	3436	3684	3461	5514	5726	5328	8003	6530	6199	9501	7079	7648	15	21	3115
Cpne8	9.38255	0.530104	5.01296e-50	877	893	1026	988	897	918	0	3	0	0	2	2	30	19	39	662	733	743				Nfe2l3	5.21181	0.393755	3.11049e-33	3183	2670	3535	2932	3764	3888	30	30	32	18	26	14	71	46	50	623	387	256	1528	2180	37
Eya2	9.1183	0.510734	1.93607e-48	4379	5664	4415	4268	4667	5485	6	8	7	11	13	2	21	20	29	81	200	77				Nexmif	7.31488	0.50968	1.01877e-32	1578	1626	1994	2042	2782	2370	2	5	8	6	2	2	7	12	11	7	6	4	1813	2029	8
Icam1	5.37836	0.33169	8.7951e-47	2936	2494	2425	2636	3802	3398	21	27	29	10	20	21	202	181	41	336	323	244				Slc45a3	3.61004	0.28332	4.94805e-32	4652	4949	3932	4324	5194	4950	185	249	132	200	214	188	1159	812	436	3373	2607	2291	7697	5670	341
Myrfl	-10.5419	0.554356	9.63258e-47	2	2	0	0	0	0	3943	3823	3833	3051	3525	3614	2014	2338	3997	5	5	1				Pde3a	-7.70406	0.533702	5.87331e-32	1	0	0	0	0	0	2674	2286	2528	1884	1872	2161	289	315	1147	2655	2163	1475	1	5	3121
Nfe2l3	6.58073	0.401709	4.53788e-46	3183	2670	3535	2932	3764	3888	30	30	32	18	26	14	71	46	50	623	387	256				Rabac1	1.97044	0.159448	1.09746e-31	2835	2505	2671	2578	2642	2637	757	749	679	696	713	783	955	892	960	1522	1124	1171	3087	2883	885
B4galnt2	-11.6268	0.572995	2.10995e-45	0	0	1	2	0	0	13293	15010	14533	14597	14231	14383	4486	4819	16632	7214	10423	11379				Slc9a4	5.14938	0.395521	1.49715e-31	14694	15340	8511	10519	10212	9609	295	299	259	371	356	281	1612	850	561	1769	1331	854	15902	9849	172
Greb1	-7.52768	0.466213	2.10995e-45	2	2	3	4	6	8	2142	2166	1498	1054	964	1151	2594	2207	3080	5975	6199	7187				Hook1	-3.55792	0.286533	2.68587e-31	3179	3084	3824	4063	3628	3368	16609	16397	15836	21600	21635	25883	17767	23766	16931	18451	15176	14431	2721	3282	23460
Slc45a3	3.5423	0.240224	2.1241e-42	4652	4949	3932	4324	5194	4950	185	249	132	200	214	188	1159	812	436	3373	2607	2291				Muc1	9.4321	0.705183	3.48387e-31	39716	48594	41056	23615	28748	32936	26	39	44	3	2	2	3	10	7	174	459	171	48453	61207	49
Ctse	8.17918	0.483806	2.35057e-42	41138	40438	29970	20433	41477	40490	30	129	66	65	115	59	132	113	87	79	118	72				Myb	-6.18875	0.480181	6.21378e-31	24	25	47	75	53	21	5685	5105	5271	2868	3012	3775	2255	3782	3582	3466	3062	2455	38	39	4448
Golm1	2.13086	0.149522	2.35057e-42	54304	51676	40666	39733	46416	50983	15201	15453	14271	11219	12992	12762	13274	14226	15719	41496	34223	29980				Ccdc141	3.74219	0.296908	7.13284e-31	4324	4343	5071	4841	4739	5263	164	167	215	207	262	230	224	345	155	128	93	96	3417	3825	107
Vdr	-3.67693	0.245344	2.83869e-42	403	337	338	172	233	272	26744	26638	22348	13004	13019	14157	2929	4103	15425	7111	6610	6548				Tmed3	1.76558	0.146246	1.08027e-30	3206	3013	3405	3030	2816	2870	1549	1553	1616	1154	1272	1238	973	1064	1938	1626	1532	1448	3007	3343	1704
9130208D14Rik	-11.6849	0.661202	2.31563e-41	0	0	1	0	0	0	19741	19085	27255	7109	7876	11008	2371	4146	9641	5114	4161	4331				AC133488.1	-4.13106	0.33978	2.56275e-30	20	20	14	16	13	23	538	379	406	371	462	453	613	655	373	255	205	255	14	32	376
Psap	2.16408	0.154985	9.66779e-41	45551	41978	33793	29883	34681	37784	13486	14464	13172	10464	11169	12010	11620	11785	15350	19419	20289	21125				Cdh17	-8.01977	0.610452	2.56275e-30	20	64	18	116	22	34	31446	32689	29811	49620	51653	49532	32707	29472	34982	36048	34704	36151	53	91	41767
Otc	-10.5623	0.697817	1.52387e-40	0	0	0	0	0	0	7315	6956	6534	3474	3633	4338	418	915	3074	17	33	18				Gm1123	-8.34816	0.550781	3.02773e-30	4	2	1	0	2	0	5496	4976	4293	3749	3431	3639	2035	3160	9023	13	18	16	1	3	4525
Muc13	-10.5652	0.581435	2.1492e-40	19	14	4	0	1	0	34686	33058	35014	39453	37839	37092	14936	14902	35443	37132	33954	30302				Fut2	5.03865	0.408839	3.31475e-30	5173	5742	5164	5188	4182	5484	202	237	218	97	110	85	333	304	562	1052	1176	1361	11439	7894	431
Abcc6	-4.91079	0.336817	6.53084e-40	7	15	7	7	16	6	1200	1231	1299	748	773	942	94	189	403	111	136	76				Muc13	-8.41039	0.61701	1.12556e-29	19	14	4	0	1	0	34686	33058	35014	39453	37839	37092	14936	14902	35443	37132	33954	30302	12	37	41842
Tmed3	2.09917	0.152919	1.23945e-39	3206	3013	3405	3030	2816	2870	1549	1553	1616	1154	1272	1238	973	1064	1938	1626	1532	1448				Fry	3.99281	0.337112	1.37295e-29	930	1060	928	591	710	576	181	176	163	115	120	123	93	141	456	60	78	148	466	794	144
Aoc1	-11.2043	0.660995	2.15689e-39	0	1	0	0	0	0	5551	5806	5706	6097	7207	7206	1342	1735	4690	8470	5947	3837				Fam114a1	2.96103	0.251787	9.7639e-29	2627	2471	2385	2002	1612	1828	494	539	581	478	530	559	335	338	791	798	639	562	2108	2775	598
Ms4a10	-8.84223	0.545579	5.8792e-39	2	4	4	9	8	10	2820	3343	2813	6173	6204	6035	1278	1319	1960	890	991	744				Cldn18	10.5454	0.686851	1.85434e-28	33788	35610	22993	30090	38513	32128	5	12	2	3	2	3	7	12	2	4	1	3	32494	9088	0
Slc17a4	-4.77696	0.328169	4.48519e-38	97	111	75	78	65	35	6846	6492	5989	5176	5626	5299	2440	2107	6382	2681	3388	3405				Vdr	-3.08319	0.255489	2.03943e-28	403	337	338	172	233	272	26744	26638	22348	13004	13019	14157	2929	4103	15425	7111	6610	6548	250	406	10916
Tmem236	-8.08753	0.514129	2.69987e-37	11	13	5	4	1	0	3754	4040	4293	5436	5300	4857	1227	1522	3615	3414	2855	2239				Golm1	1.63736	0.141969	6.49976e-28	54304	51676	40666	39733	46416	50983	15201	15453	14271	11219	12992	12762	13274	14226	15719	41496	34223	29980	33302	39273	13864
Fry	4.40953	0.326062	1.04544e-36	930	1060	928	591	710	576	181	176	163	115	120	123	93	141	456	60	78	148				Gpm6b	6.37213	0.502365	6.49976e-28	1752	1402	1097	783	1159	1507	22	17	17	9	7	6	8	9	11	11	1	5	676	949	13
Adgrg7	-10.9548	0.63182	1.96138e-36	8	1	4	1	0	2	6534	7227	6728	19375	18879	17843	12782	9161	13919	15258	16031	14914				Gna14	6.79232	0.56803	1.15428e-27	837	831	1738	953	1196	842	11	9	19	2	2	6	20	18	60	1588	2492	2742	911	2455	29
Pcsk5	-8.02799	0.515531	2.9727e-36	10	13	0	10	9	1	4040	4585	3324	5094	5537	5267	913	830	2255	2065	1512	1470				Setbp1	4.61974	0.416846	1.73095e-27	1872	1813	1908	1058	1161	1153	330	502	420	109	94	133	50	58	398	429	680	817	1172	1997	586
Cxcl17	13.1894	0.786367	3.55101e-36	4002	4352	3495	2542	3405	3851	0	0	0	0	0	0	0	0	1	0	0	1				Proc	5.7602	0.480762	1.21989e-26	308	330	278	101	222	212	41	56	46	26	34	27	9	18	40	40	35	25	432	498	10
Ctss	-7.74353	0.508497	4.72874e-36	3	0	2	1	0	1	1159	1486	1554	1478	1279	1364	401	641	1952	3575	3963	3924				Anxa13	-7.95467	0.625499	3.04485e-26	9	18	7	5	10	0	10871	13244	10855	18031	21455	18395	1980	3857	11658	39	32	20	12	17	14815
Fn1	8.89835	0.537197	1.068e-35	21609	16028	38044	13348	44915	43349	7	3	10	12	18	17	2138	765	340	3074	1734	1403				Ttc39a	2.75521	0.244939	3.04485e-26	3865	4602	4010	3221	3125	3172	622	731	709	691	680	823	818	1145	1324	2919	2426	1902	4998	5034	1259
Akt3	9.00832	0.569292	1.71718e-35	1274	1066	1538	727	1068	1095	2	3	4	2	2	1	7	3	9	9	11	13				Tirap	1.68049	0.149827	4.45251e-26	2025	2063	1855	1759	1903	1846	682	780	861	636	632	706	1355	1212	915	1626	1335	1505	2412	2395	608
Defa24	-12.2271	0.760379	4.34718e-35	0	0	0	0	0	0	25113	34093	49660	30113	21801	25651	3151	7184	36905	3	33	38				Rab27a	3.74685	0.335457	1.45658e-25	3004	3392	2014	1885	1840	1755	342	395	442	195	229	234	240	315	466	413	309	277	3609	2732	459
Rabac1	1.91444	0.147642	5.73699e-35	2835	2505	2671	2578	2642	2637	757	749	679	696	713	783	955	892	960	1522	1124	1171				Ctf1	3.51823	0.31937	1.88519e-25	378	360	300	191	226	238	149	181	117	66	54	73	17	38	101	31	32	27	211	247	91
Slc9a3r2	4.02522	0.300056	7.34115e-35	869	885	798	718	977	876	93	105	77	39	57	66	75	85	105	71	42	46				Wtip	2.64129	0.239909	5.98275e-25	2553	2899	2553	2304	2691	2402	516	514	526	344	449	363	701	482	674	751	831	604	2887	3614	632
Defa17	-11.8247	0.770156	1.31822e-34	0	0	0	0	0	0	9146	13539	17396	19034	14969	16958	1865	4304	19826	2	8	9				Ptges	8.07122	0.683595	8.93029e-25	7057	6224	6089	1667	2232	2335	31	78	15	41	65	47	78	23	295	142	165	72	2748	3285	15
Abcc2	-11.9668	0.695602	2.75709e-34	0	1	1	1	1	2	5015	4504	3749	16292	18377	16576	6738	5462	5239	114	57	31				Cxcl17	11.0106	0.798277	1.05836e-24	4002	4352	3495	2542	3405	3851	0	0	0	0	0	0	0	0	1	0	0	1	1742	1938	0
Naip1	-8.02565	0.530775	3.43442e-34	5	16	8	44	22	11	3436	3684	3461	5514	5726	5328	8003	6530	6199	9501	7079	7648				Adgrg7	-7.97538	0.663005	1.9438e-24	8	1	4	1	0	2	6534	7227	6728	19375	18879	17843	12782	9161	13919	15258	16031	14914	10	9	10879
Nexmif	8.40023	0.535361	3.97964e-34	1578	1626	1994	2042	2782	2370	2	5	8	6	2	2	7	12	11	7	6	4				Osbpl6	-5.66993	0.497487	5.19503e-24	76	45	52	60	33	36	1283	1369	1473	1645	1505	1643	324	352	572	225	105	77	8	17	1271
Nr5a2	-9.13032	0.672707	1.0595e-33	0	0	0	0	0	0	1327	1276	1167	830	969	1044	326	549	1170	522	601	691				Slc9a3r2	3.24638	0.299341	7.22586e-24	869	885	798	718	977	876	93	105	77	39	57	66	75	85	105	71	42	46	585	685	80
Dnah8	-5.5123	0.412414	1.65052e-33	6	3	7	9	4	6	523	373	321	255	325	274	357	483	383	366	318	242				Sntb1	6.4441	0.549609	7.88688e-24	733	801	779	404	602	844	7	24	20	14	22	16	5	8	24	1	0	0	986	490	17
Hsd17b13	-6.01623	0.423632	3.18864e-33	40	43	35	40	42	28	5182	5653	4806	5745	5188	6058	590	649	1274	77	180	248				Pde8a	5.11675	0.433969	9.53951e-24	846	956	635	771	785	853	46	50	54	30	19	27	2	7	11	6	12	14	1220	860	41
Pde3a	-9.57012	0.642127	3.44993e-33	1	0	0	0	0	0	2674	2286	2528	1884	1872	2161	289	315	1147	2655	2163	1475				Rap1gap	3.57868	0.339506	1.75555e-23	11476	12501	13420	11788	7653	7672	2993	3168	2309	1067	1296	1439	1009	1285	2828	355	425	306	14055	17854	4663
Gna14	7.80066	0.542185	5.38769e-33	837	831	1738	953	1196	842	11	9	19	2	2	6	20	18	60	1588	2492	2742				Sh3pxd2a	3.84517	0.358435	2.03522e-23	4302	3836	3576	2774	3950	3808	301	393	476	160	205	212	528	526	570	1007	1279	776	2831	3886	356
Nrp2	3.70194	0.287289	3.69401e-32	1772	1730	1910	1960	1863	2015	100	122	176	96	118	96	234	346	201	3513	3119	2519				Slc17a4	-4.86512	0.428938	2.39474e-23	97	111	75	78	65	35	6846	6492	5989	5176	5626	5299	2440	2107	6382	2681	3388	3405	22	92	5186
Fam114a1	3.11595	0.248557	4.21819e-32	2627	2471	2385	2002	1612	1828	494	539	581	478	530	559	335	338	791	798	639	562				Lpcat2	5.70197	0.526549	4.23639e-23	450	514	333	515	440	350	26	17	12	5	9	10	15	19	66	176	115	61	453	750	40
Trim36	-4.26294	0.329648	6.62811e-32	33	40	22	38	33	39	504	465	508	683	649	696	274	337	260	1678	1532	1293				Far2	-6.11661	0.539829	4.82508e-23	1	4	2	8	0	1	5783	4844	4611	3013	3223	4068	955	1919	2424	9	18	4	48	16	5010
Cdh17	-9.14904	0.575749	6.9271e-32	20	64	18	116	22	34	31446	32689	29811	49620	51653	49532	32707	29472	34982	36048	34704	36151				Mecom	2.90785	0.272778	6.49014e-23	7026	7763	4876	5513	6488	6065	841	934	1008	1042	1164	1015	2750	3069	2583	6290	5157	4590	9730	10664	876
Atp8b2	4.79737	0.364706	8.65108e-32	1020	863	551	517	811	748	31	38	39	22	26	36	84	71	89	37	33	16				Tmem236	-5.67305	0.500376	9.38155e-23	11	13	5	4	1	0	3754	4040	4293	5436	5300	4857	1227	1522	3615	3414	2855	2239	20	44	5264
Gmpr	5.20124	0.387049	9.60562e-32	683	550	736	739	827	727	17	12	14	7	5	14	75	50	35	21	29	33				Abcc2	-8.38715	0.72782	1.06531e-22	0	1	1	1	1	2	5015	4504	3749	16292	18377	16576	6738	5462	5239	114	57	31	1	11	5642
Ccdc141	3.74707	0.287817	1.17493e-31	4324	4343	5071	4841	4739	5263	164	167	215	207	262	230	224	345	155	128	93	96				Kctd17	4.97948	0.459437	2.2336e-22	199	273	312	203	197	334	41	40	51	13	18	13	8	17	26	450	363	387	577	769	39
Ccl25	-3.41203	0.261962	1.84772e-31	191	167	178	133	153	140	9143	9846	11375	8594	8282	9511	488	896	4244	189	192	173				Reg4	-7.69102	0.638122	2.90992e-22	0	0	0	0	0	0	5962	6505	10068	3531	3257	3457	2623	5832	19429	940	697	189	4	5	11410
Slc26a3	-10.9943	0.745311	2.20872e-31	0	0	0	0	0	0	2416	2654	2319	4476	5016	5491	269	301	767	9100	7693	5123				Ffar4	3.0416	0.292874	3.18476e-22	1653	1687	2098	1213	1469	1616	260	271	225	138	195	173	384	350	486	463	535	675	2265	2963	435
Rab27a	3.98597	0.317388	3.56379e-31	3004	3392	2014	1885	1840	1755	342	395	442	195	229	234	240	315	466	413	309	277				Clu	5.31905	0.470009	3.66764e-22	919318	885272	606546	333576	691525	833239	3775	4745	3857	3111	5258	2849	44915	30828	9615	22644	14241	12406	392357	508330	2095
Smad6	5.09956	0.393873	5.96093e-31	406	475	502	239	338	443	48	66	60	34	24	39	9	17	54	40	52	63				Sh3bp1	4.89569	0.475223	7.82542e-22	795	743	815	372	583	679	70	34	46	14	20	28	9	23	41	3	7	3	676	902	125
Plcl2	-6.47969	0.473316	6.75317e-31	17	3	0	4	12	0	1632	1732	1648	889	906	1097	827	1113	1614	2051	1744	1826				Defa17	-7.69127	0.651291	1.11698e-21	0	0	0	0	0	0	9146	13539	17396	19034	14969	16958	1865	4304	19826	2	8	9	3	17	12404
Dtna	8.16918	0.562763	6.97372e-31	983	822	1123	776	597	810	3	3	5	2	1	1	14	7	11	5	1	0				Defa24	-7.0722	0.60312	1.54495e-21	0	0	0	0	0	0	25113	34093	49660	30113	21801	25651	3151	7184	36905	3	33	38	15	29	22361
Pitx2	-9.50617	0.653505	8.54017e-31	0	1	0	0	1	0	812	580	688	752	745	795	628	800	782	1	0	0				Rsph9	4.62746	0.442493	2.56419e-21	320	323	314	285	267	270	25	15	16	7	10	8	14	10	34	18	20	4	140	210	13
A1cf	-9.78649	0.6938	5.5505e-30	0	0	0	0	1	0	1413	1477	1581	1913	2022	2024	292	365	833	290	470	445				Greb1	-8.14437	0.622307	3.15954e-21	2	2	3	4	6	8	2142	2166	1498	1054	964	1151	2594	2207	3080	5975	6199	7187	2	1	2583
Clu	6.03428	0.43373	7.69542e-30	919318	885272	606546	333576	691525	833239	3775	4745	3857	3111	5258	2849	44915	30828	9615	22644	14241	12406				Krt13	9.43463	0.71365	4.39846e-21	56	64	27	78	80	71	7	3	1	3	7	4	11	12	8	201	98	55	17640	2921	1
Rsph9	5.58352	0.429465	1.28048e-29	320	323	314	285	267	270	25	15	16	7	10	8	14	10	34	18	20	4				Mpp3	-4.36618	0.416367	4.39846e-21	72	82	113	80	62	63	992	895	695	456	457	570	381	592	495	545	622	695	16	28	703
Tenm4	4.52189	0.346061	1.39728e-29	3454	2873	4615	3248	3874	3852	44	86	80	72	68	75	172	161	58	142	165	102				Pde9a	-3.21609	0.308227	5.30953e-21	213	140	170	118	190	189	2100	1914	1582	1122	1129	1167	511	567	1534	5240	3783	3378	57	83	1967
Anxa13	-8.83301	0.574042	1.51404e-29	9	18	7	5	10	0	10871	13244	10855	18031	21455	18395	1980	3857	11658	39	32	20				Atp8b2	3.57644	0.349079	5.35065e-21	1020	863	551	517	811	748	31	38	39	22	26	36	84	71	89	37	33	16	557	610	75
Ttc39a	2.88064	0.239382	1.83521e-29	3865	4602	4010	3221	3125	3172	622	731	709	691	680	823	818	1145	1324	2919	2426	1902				Ttc9	4.75859	0.439872	7.76727e-21	4632	4134	4071	3774	5876	5718	11	30	20	57	65	39	368	288	138	474	303	344	3207	2839	28
Basp1	6.28186	0.450169	4.41015e-29	6208	6053	6588	4305	6800	8019	11	19	16	24	40	20	433	179	80	218	144	76				Ctse	6.44696	0.57631	8.79211e-21	41138	40438	29970	20433	41477	40490	30	129	66	65	115	59	132	113	87	79	118	72	16989	10146	21
Rgl3	5.48569	0.424464	1.36569e-28	2582	2485	2399	1526	1447	1887	56	66	53	22	39	35	113	56	71	1189	1409	1133				Rbms1	2.03697	0.201657	1.23943e-20	4296	3983	4819	3967	5319	4691	374	429	414	315	498	364	2415	1707	818	4051	3180	3071	4321	5289	498
Rbms1	2.33853	0.19553	1.4848e-28	4296	3983	4819	3967	5319	4691	374	429	414	315	498	364	2415	1707	818	4051	3180	3071				Icam1	3.95579	0.371085	1.44102e-20	2936	2494	2425	2636	3802	3398	21	27	29	10	20	21	202	181	41	336	323	244	1859	2994	45
Enpp1	1.99052	0.168887	1.61574e-28	4776	4486	4339	4065	3976	4844	963	926	896	895	936	1008	1190	1398	942	703	584	650				Snhg18	4.19133	0.42865	2.02137e-20	575	537	484	208	225	223	543	568	526	155	143	191	1	0	12	60	120	124	151	266	113
Gpm6b	6.97887	0.504153	4.47388e-27	1752	1402	1097	783	1159	1507	22	17	17	9	7	6	8	9	11	11	1	5				Dtna	5.7281	0.519727	2.1139e-20	983	822	1123	776	597	810	3	3	5	2	1	1	14	7	11	5	1	0	393	744	9
Abhd11	-1.5123	0.133099	5.3198e-27	972	847	783	837	876	922	2539	2665	2347	2303	2597	2692	3411	3286	3239	2455	2303	2242				Mlxipl	-4.9722	0.470052	4.16925e-20	52	64	65	91	41	33	13889	12508	16494	8900	10367	11941	1974	3352	5771	1258	945	760	33	131	9986
Tmem63a	1.49421	0.131533	5.41904e-27	6320	7050	6219	6515	6315	5827	2496	2497	2334	1749	2077	2277	3480	3197	2929	4689	4130	3552				Prkg2	-5.57407	0.532787	5.79083e-20	3	5	2	0	2	2	3168	3699	3522	5767	4995	5422	2430	2758	4299	1373	1512	1903	67	20	4329
Cited4	2.70062	0.23125	1.07573e-26	1103	985	1128	954	1361	1085	109	120	94	91	132	142	169	161	112	116	85	87				Triqk	4.38366	0.442018	6.14201e-20	365	345	215	177	106	170	42	32	49	11	28	24	12	8	56	8	10	13	263	386	73
Ckap4	4.03298	0.333362	1.10858e-26	4159	3845	5033	5654	6000	5463	196	214	150	158	252	217	805	573	548	1034	618	451				Slc26a3	-7.84154	0.695721	7.80473e-20	0	0	0	0	0	0	2416	2654	2319	4476	5016	5491	269	301	767	9100	7693	5123	7	0	2491
Akp-ps1	-9.67356	0.743785	1.84308e-26	0	1	0	0	0	0	1539	1607	1262	967	834	982	12	22	21	46	32	76				Arntl2	2.94042	0.294078	1.03492e-19	1253	1281	1141	882	1046	1339	172	195	153	138	136	147	403	350	209	277	204	288	1562	2020	124
Muc1	10.15	0.646669	5.13207e-26	39716	48594	41056	23615	28748	32936	26	39	44	3	2	2	3	10	7	174	459	171				Rab3d	2.15954	0.223711	1.64508e-19	7243	8860	6813	7356	7262	7288	2797	3037	2897	1938	2228	2526	1361	1683	2693	3937	3254	2152	9432	9231	3265
Mpp2	4.60827	0.387874	5.49267e-26	760	777	813	548	808	675	107	90	71	43	53	66	34	16	76	41	67	39				Mlph	2.55328	0.26276	1.66571e-19	10273	12170	5916	8149	9229	9134	2935	3143	3100	2226	2514	2344	3062	2669	3756	3897	3305	3287	13399	11368	3489
Armcx3	4.58289	0.379621	6.84339e-26	429	395	384	432	359	344	29	27	31	14	18	19	17	21	24	5	15	1				Arhgef26	-2.71229	0.27642	1.79297e-19	534	390	721	534	556	391	2685	2934	3203	2507	2510	2803	1995	2422	2202	2054	1918	1978	350	477	2891
Pacsin3	3.31863	0.287506	9.52278e-26	1934	1929	1570	1308	1721	1601	180	226	151	119	130	134	202	287	162	469	384	360				Pygb	2.2309	0.231522	2.07056e-19	9074	10144	7687	5268	5446	6593	3529	3781	3321	2456	2697	3022	2596	3263	3400	5798	5075	4838	12151	12937	4325
Wtip	2.7631	0.244335	1.17129e-25	2553	2899	2553	2304	2691	2402	516	514	526	344	449	363	701	482	674	751	831	604				Cldn15	-7.304	0.668049	2.10702e-19	0	6	1	24	6	8	13690	14702	14712	18726	17496	20261	3571	5163	13446	5736	7592	8665	12	22	15098
Fndc3b	2.64629	0.235109	1.22877e-25	8214	8048	10252	6664	8634	8770	1903	2030	2146	1316	1510	1568	2316	1951	2629	2484	1857	1834				Trim36	-3.99331	0.404612	2.26257e-19	33	40	22	38	33	39	504	465	508	683	649	696	274	337	260	1678	1532	1293	15	38	566
Lpcat2	6.17546	0.499541	1.22877e-25	450	514	333	515	440	350	26	17	12	5	9	10	15	19	66	176	115	61				Acot2	-2.8746	0.294897	2.3468e-19	63	70	87	87	80	65	214	263	212	220	247	319	118	83	54	77	98	79	96	143	526
Sntb1	6.37425	0.487839	1.25266e-25	733	801	779	404	602	844	7	24	20	14	22	16	5	8	24	1	0	0				Aldh3a1	10.3119	0.829323	3.80846e-19	22443	23164	6452	6040	4161	8936	0	0	0	0	2	2	18	20	16	15	9	2	16009	8899	0
Setbp1	5.18212	0.454511	1.37689e-25	1872	1813	1908	1058	1161	1153	330	502	420	109	94	133	50	58	398	429	680	817				Ddit4l	4.44	0.430285	3.95227e-19	1239	1109	1201	843	1531	1711	16	31	32	23	31	23	213	132	62	56	53	23	1118	810	16
Reg4	-10.2438	0.752232	1.395e-25	0	0	0	0	0	0	5962	6505	10068	3531	3257	3457	2623	5832	19429	940	697	189				Itln1	-7.25202	0.654436	5.71658e-19	144	67	218	212	363	625	36338	42389	57892	36339	30856	33525	4824	12515	34045	374	472	449	47	43	26851
E2f2	-4.16177	0.356069	1.72464e-25	50	67	78	50	95	70	1120	993	833	952	1371	1399	741	1240	836	1290	945	1037				Ms4a10	-5.37864	0.542076	1.92568e-18	2	4	4	9	8	10	2820	3343	2813	6173	6204	6035	1278	1319	1960	890	991	744	59	37	2594
Malrd1	-8.97434	0.692633	1.72464e-25	0	1	0	0	0	0	2495	2902	3329	2045	1794	1992	390	691	3184	104	106	246				Armcx3	3.10627	0.319072	2.18972e-18	429	395	384	432	359	344	29	27	31	14	18	19	17	21	24	5	15	1	308	381	55
Btbd11	4.56286	0.374177	1.9971e-25	626	658	586	989	1191	926	3	8	8	12	7	12	130	82	29	1129	816	761				Eml1	6.56557	0.602571	2.52016e-18	1969	2215	1974	1733	2069	2078	38	35	22	3	7	10	1	2	6	1	2	1	1435	1438	28
Arhgap31	-5.14166	0.435429	2.6241e-25	8	2	4	14	6	4	243	294	299	298	322	323	429	413	567	334	187	169				Hs3st3b1	5.06036	0.512538	2.526e-18	1324	1574	1210	873	710	853	23	27	32	23	24	35	110	251	74	287	201	313	1660	1847	54
Myb	-6.02177	0.473828	2.82582e-25	24	25	47	75	53	21	5685	5105	5271	2868	3012	3775	2255	3782	3582	3466	3062	2455				Sytl1	3.79224	0.398128	2.526e-18	2644	2211	1819	1161	1348	1290	249	292	310	230	279	252	338	286	476	647	501	307	1934	1296	233
Aldh3a1	12.1298	0.738337	3.46977e-25	22443	23164	6452	6040	4161	8936	0	0	0	0	2	2	18	20	16	15	9	2				Sidt1	2.67466	0.288228	3.95784e-18	2037	2249	1618	1386	1159	1307	624	535	615	325	428	462	565	706	1133	534	868	818	2506	2454	809
Ppp1r14d	-6.05109	0.475111	3.53114e-25	34	26	18	23	22	17	1542	1800	1604	3164	3421	3099	1450	1538	2593	2871	2629	2292				Jaml	-5.40617	0.534899	4.3482e-18	277	220	573	929	437	476	5709	6311	5907	4277	4256	5185	1844	2195	2985	821	414	334	53	97	4430
Timp2	3.95021	0.330264	3.99957e-25	5247	4858	5460	4674	7426	6760	95	166	103	88	137	98	1501	835	308	1462	1072	691				Clca3b	-6.37227	0.618587	4.49449e-18	28	54	99	98	25	48	47837	44298	51158	12049	15188	19568	17569	25917	20800	3781	3581	4090	177	186	24006
Ffar4	3.52011	0.311417	5.03731e-25	1653	1687	2098	1213	1469	1616	260	271	225	138	195	173	384	350	486	463	535	675				Pacsin3	3.00197	0.318689	5.35964e-18	1934	1929	1570	1308	1721	1601	180	226	151	119	130	134	202	287	162	469	384	360	2070	1737	292
Rab3d	2.39604	0.21819	5.24983e-25	7243	8860	6813	7356	7262	7288	2797	3037	2897	1938	2228	2526	1361	1683	2693	3937	3254	2152				Sox2	10.5361	0.830311	5.35964e-18	1410	1680	1311	724	575	1121	0	1	0	0	0	0	1	1	0	0	1	0	1946	2899	0
Cryz	2.50581	0.227697	1.03726e-24	907	846	974	743	787	790	214	250	169	187	182	154	156	166	190	1179	1092	931				Enah	3.60125	0.348832	5.39025e-18	4860	4568	5288	5188	5824	5543	2	13	9	5	10	11	90	75	14	9	11	18	4023	5151	70
Pla2g16	2.26094	0.207213	1.09122e-24	2450	2525	2434	2414	2866	2617	899	1156	1091	703	681	796	801	999	1397	635	558	448				Fxyd3	3.09413	0.327	5.47219e-18	10440	11240	9294	10427	12219	13138	1471	1552	1638	728	865	805	1669	1656	1532	1263	1037	1130	8230	10483	1087
Gm45912	-9.05602	0.75023	1.17581e-24	0	0	0	0	0	0	2004	1837	2629	689	719	994	219	398	898	436	357	372				Pla2g10	3.7818	0.40194	5.50491e-18	479	706	438	626	488	588	39	35	48	30	55	22	58	70	122	887	774	520	578	885	108
Arhgef3	2.03298	0.184903	2.39476e-24	3223	3113	3445	3192	3431	3193	372	404	347	433	475	415	2093	1525	879	2106	1500	1303				Erlec1	1.37278	0.148837	5.9901e-18	3433	3491	3220	2580	2643	2858	1931	1969	1884	1673	1622	1771	1554	1427	2014	2512	2424	2254	3527	3360	1893
Defa30	-10.9048	0.800006	2.72215e-24	0	0	0	0	0	0	5856	8425	13169	13410	9040	10988	468	1055	7878	0	10	9				Inha	5.50841	0.505357	6.63696e-18	556	457	571	203	317	317	2	7	1	0	1	0	0	2	1	1	1	0	644	871	35
Ang4	-10.6351	0.736309	4.20122e-24	0	0	0	1	0	0	3495	4054	5142	10463	7764	9685	995	2607	9191	2427	2987	2052				Sult1c2	5.86623	0.655091	7.0501e-18	10875	15264	4279	1385	842	2092	2250	2809	2534	770	704	877	139	245	1354	209	380	250	18516	12883	1265
Crtap	2.12339	0.19634	4.49929e-24	1024	963	998	966	1199	1136	294	326	324	228	224	261	341	441	395	413	376	402				Bcas1	4.2689	0.457061	7.42106e-18	5893	7042	3376	6871	6740	5674	651	593	785	295	397	349	798	690	1524	366	339	363	10555	6647	1267
Sh3bp1	5.66764	0.474785	4.51195e-24	795	743	815	372	583	679	70	34	46	14	20	28	9	23	41	3	7	3				Pllp	3.22071	0.347987	1.09069e-17	3427	4195	1890	2065	2052	1781	1113	1126	915	601	741	703	343	350	573	947	849	775	4086	2879	832
Kank1	-3.46032	0.306124	4.69983e-24	49	71	81	96	119	71	1521	1671	1617	1241	1171	1388	839	1062	1522	1477	1349	1306				Tfcp2l1	3.46514	0.370866	1.26405e-17	3155	4163	2123	2301	2199	2036	585	735	862	292	473	437	755	698	763	6068	5718	5516	6014	5455	739
Pde8a	5.60636	0.447239	4.88019e-24	846	956	635	771	785	853	46	50	54	30	19	27	2	7	11	6	12	14				Mindy1	1.42603	0.155964	1.45065e-17	5074	5279	4810	4465	5412	4941	2417	2376	2270	1575	1897	1939	2018	2172	2383	4244	3364	2763	4267	4476	1793
Atoh1	-8.02313	0.720681	6.09649e-24	0	0	0	0	0	0	625	620	767	343	346	386	382	708	1390	168	165	110				Tesc	5.58489	0.539625	2.72976e-17	1044	1233	946	1002	1020	870	19	20	33	4	5	9	7	5	6	3	2	2	962	616	15
Prom2	6.69936	0.542879	6.34429e-24	348	466	433	461	374	344	0	6	0	6	7	3	31	14	40	51	59	30				Mep1a	-5.23271	0.524313	3.73424e-17	0	0	1	2	0	0	1759	1950	2060	1637	1891	1654	176	261	1891	3051	4510	3081	6	7	1792
Insyn1	4.20616	0.370172	6.87966e-24	456	403	286	239	387	370	16	23	29	27	23	25	37	46	50	68	65	84				Mgam	-7.03172	0.681964	4.25498e-17	248	219	1409	735	638	593	22980	26160	26190	69027	65797	65850	18697	23820	51475	17765	14658	16713	78	108	35381
Ms4a12	-7.72586	0.648902	6.87966e-24	0	1	0	0	0	0	437	463	479	374	335	395	93	138	301	494	449	342				Cpne8	5.39953	0.580264	4.3975e-17	877	893	1026	988	897	918	0	3	0	0	2	2	30	19	39	662	733	743	994	1418	59
Tmem41a	-2.09502	0.194631	9.07173e-24	271	300	280	287	331	230	1248	1204	1243	1243	1386	1350	752	851	842	641	527	534				Onecut3	4.84525	0.478071	4.3975e-17	1706	1582	1609	993	1191	1122	31	32	25	6	5	10	2	6	5	1	0	0	721	1075	56
Bcas1	4.42799	0.391306	9.90659e-24	5893	7042	3376	6871	6740	5674	651	593	785	295	397	349	798	690	1524	366	339	363				Sept5	-4.74721	0.497363	4.41612e-17	69	80	130	182	185	167	2987	2521	1707	3409	4008	4252	2998	2888	3748	2278	1728	2176	86	123	4066
Bik	3.99886	0.36644	1.89727e-23	198	219	160	125	177	119	21	30	32	13	11	29	32	65	90	83	100	82				Hsd17b13	-4.79812	0.494491	4.55619e-17	40	43	35	40	42	28	5182	5653	4806	5745	5188	6058	590	649	1274	77	180	248	95	42	5146
Vtcn1	6.17727	0.488675	2.03707e-23	4657	4552	3696	3130	4561	5425	30	55	36	30	30	32	126	112	72	109	61	13				Eps8l1	4.67753	0.496628	4.58998e-17	2091	2430	1467	1140	1577	1410	330	327	360	139	151	158	694	397	522	547	354	420	2112	1735	83
Muc3	-10.6336	0.698022	2.17881e-23	0	0	0	0	4	2	5898	5320	2731	13180	13045	11755	2215	1450	6296	13933	10065	13611				Lhpp	-2.34746	0.253754	5.98737e-17	176	189	165	120	150	167	2653	2712	2919	1403	1435	1722	514	765	1427	232	251	317	151	138	2120
Pla2g10	4.42943	0.394926	2.81552e-23	479	706	438	626	488	588	39	35	48	30	55	22	58	70	122	887	774	520				Pdss1	-2.95931	0.322825	7.00685e-17	140	182	198	279	255	236	3027	2605	2307	2012	2178	2687	872	1369	1252	1053	907	945	239	344	2281
Lemd1	9.19017	0.770651	3.22096e-23	1437	1331	1398	958	1040	1338	0	0	0	0	0	0	135	71	14	68	40	40				0610040J01Rik	1.15255	0.128852	7.69426e-17	3715	3891	3463	3783	3867	3770	2131	2328	2046	1928	2053	2249	1720	1913	2002	3264	2953	2773	3624	5126	2273
Defa28	-9.34482	0.785225	3.94027e-23	0	0	0	0	0	0	1340	1863	2187	2289	1837	2172	231	472	2456	0	3	2				Zbtb7c	7.14199	0.721555	8.81309e-17	349	570	250	144	239	358	7	8	11	3	0	1	31	13	27	241	224	252	1070	453	6
Clrn3	-7.23286	0.553087	4.06362e-23	7	24	7	18	1	4	2153	2454	2491	3818	3480	3487	1289	1446	2112	2331	2295	2027				Cldn3	-4.53681	0.48528	9.66396e-17	195	166	179	387	412	145	7191	8045	7055	10363	11570	11043	10942	9346	11308	14082	11440	10691	345	233	9177
Cldn15	-9.23183	0.627862	5.26381e-23	0	6	1	24	6	8	13690	14702	14712	18726	17496	20261	3571	5163	13446	5736	7592	8665				Gpr155	-3.89549	0.419553	1.10313e-16	58	62	69	56	74	66	475	512	484	806	673	831	31	49	29	31	34	39	51	59	705
Alcam	2.77619	0.258317	7.17823e-23	22420	22651	17833	13747	15576	16786	2986	3127	2875	2232	2434	2256	3653	2891	2690	4565	3273	3152				Muc6	9.75077	0.692491	1.22027e-16	29149	30011	59664	36572	40600	27562	1	0	1	1	0	2	2	2	0	0	1	2	4991	6647	2
Agmat	-9.08156	0.768908	8.24994e-23	0	0	0	1	0	0	934	901	900	843	827	1082	37	144	184	0	3	0				Ptpn13	8.38032	0.707581	1.22073e-16	8851	7958	8853	5471	8742	9812	8	17	15	3	11	6	6	10	1	1148	207	129	6413	9705	3
Hbegf	2.14714	0.202263	8.48225e-23	3185	2800	3035	2828	3672	3838	542	653	542	447	571	508	1347	1176	910	1699	1239	1067				Ltbp4	4.68306	0.543913	1.28796e-16	6934	6466	4190	2032	2862	3225	350	369	376	100	104	125	250	194	549	336	292	212	2269	2864	466
Dnajc10	2.24385	0.21158	8.71711e-23	17464	15990	19553	21582	22515	16660	3203	3775	3554	3406	3750	3981	4163	4306	4003	5143	4626	3879				Guca2a	-7.74495	0.721988	1.48855e-16	2	3	0	1	4	4	1153	1380	1300	3331	2560	2145	1245	2714	7217	1078	1997	2361	0	6	3830
Tm4sf5	-5.32117	0.445987	1.15436e-22	177	174	62	163	127	99	7756	9145	7875	11488	11888	11612	1538	2246	3738	338	221	196				Scel	4.86369	0.495108	1.57223e-16	1065	942	1223	1839	2742	2361	24	19	25	15	54	36	296	226	106	731	419	303	1205	1441	10
Casp1	-7.29091	0.558747	1.41587e-22	4	15	2	17	26	1	3868	4023	4050	3348	3597	3930	1737	2013	3796	3888	4113	4009				Gm20219	2.55628	0.284995	1.79062e-16	610	662	429	442	540	559	155	147	156	83	113	123	429	394	360	286	205	150	374	452	75
Clca3b	-7.76884	0.573332	1.44879e-22	28	54	99	98	25	48	47837	44298	51158	12049	15188	19568	17569	25917	20800	3781	3581	4090				Slc30a10	-6.27164	0.611825	1.86258e-16	16	11	20	10	5	1	5513	5825	4788	6110	5056	5637	1621	1183	10447	329	401	816	6	12	5262
Sh3pxd2a	4.08412	0.371842	1.59776e-22	4302	3836	3576	2774	3950	3808	301	393	476	160	205	212	528	526	570	1007	1279	776				Cerkl	5.7746	0.581803	2.46569e-16	185	197	120	48	37	69	18	14	23	10	2	6	0	2	10	1	1	0	138	488	26
Gabarapl1	1.92674	0.184504	1.91269e-22	3239	3001	3194	2642	2606	2923	677	848	905	600	683	690	1566	1552	1211	1171	1044	1022				Akp-ps1	-7.19325	0.699721	3.06845e-16	0	1	0	0	0	0	1539	1607	1262	967	834	982	12	22	21	46	32	76	3	2	572
Tmem123	1.87768	0.180621	2.30579e-22	4016	3846	3609	3304	4021	4190	1281	1224	1376	882	928	1002	1330	1396	1245	1693	1339	1246				4930404N11Rik	4.85734	0.505339	3.07634e-16	163	178	229	141	175	155	16	13	12	5	11	6	4	11	12	12	3	10	151	304	14
Mecom	2.53074	0.239803	2.45283e-22	7026	7763	4876	5513	6488	6065	841	934	1008	1042	1164	1015	2750	3069	2583	6290	5157	4590				Slc27a2	-6.83807	0.669813	3.43141e-16	0	2	1	0	0	0	5956	6799	7413	1622	1718	2490	271	592	1137	1	7	6	5	3	3002
Hmgcll1	4.60104	0.416711	2.87387e-22	350	274	318	446	532	371	0	0	0	8	3	10	440	313	89	1529	1193	1479				Smad6	2.82047	0.328452	3.75386e-16	406	475	502	239	338	443	48	66	60	34	24	39	9	17	54	40	52	63	424	590	360
Igf2bp3	-9.34027	0.740324	2.8991e-22	0	0	0	1	0	1	888	980	1531	746	766	1250	5	19	15	2	4	2				Mboat2	3.91739	0.416559	7.31352e-16	2146	2362	2087	1857	1605	1792	115	117	76	152	80	129	111	49	43	1100	653	594	2796	4153	101
Slc7a9	-7.97736	0.617458	3.69915e-22	2	1	3	0	3	5	1329	1537	1411	2573	2668	2585	136	282	621	16	29	12				Cpne2	2.95692	0.336512	8.16834e-16	936	1020	1057	1159	1537	974	192	182	127	123	152	117	217	247	330	1558	1382	1778	601	1049	130
Reep5	2.58718	0.246355	4.41011e-22	3081	3009	2837	3004	4111	3228	552	655	707	405	501	432	933	775	833	1318	1105	1066				Slc39a5	-7.34889	0.695762	1.00709e-15	1	0	0	0	0	0	4088	4102	2738	3859	4305	4559	51	160	879	1016	1082	419	1	5	4627
Slc5a1	-10.8325	0.67817	6.05849e-22	2	3	6	11	0	6	16882	20758	20120	84970	69481	77907	1990	3326	12023	1936	2437	1942				Slc7a9	-6.69806	0.677659	1.00709e-15	2	1	3	0	3	5	1329	1537	1411	2573	2668	2585	136	282	621	16	29	12	2	7	1496
Rap1gap	3.90311	0.369365	6.11393e-22	11476	12501	13420	11788	7653	7672	2993	3168	2309	1067	1296	1439	1009	1285	2828	355	425	306				Smim14	1.85124	0.213239	1.06076e-15	6884	6761	5989	7660	6959	6069	1815	1837	1734	1776	1995	2016	2155	1882	2523	2557	2168	1857	6651	6579	2405
Pld3	2.01618	0.195661	6.44596e-22	3903	4005	3480	2883	4016	3633	1317	1248	998	885	1058	1009	921	753	960	1300	1186	1080				Yipf2	1.66954	0.192613	1.07409e-15	2784	2598	2391	2376	2294	2302	957	1060	873	710	831	896	1188	852	1141	1374	1188	931	2718	2560	940
Gm8979	-10.413	0.772549	6.97644e-22	0	0	0	0	0	0	16154	14492	16491	2258	2572	3845	516	997	4302	1296	1125	1263				Psap	1.65853	0.193176	1.11906e-15	45551	41978	33793	29883	34681	37784	13486	14464	13172	10464	11169	12010	11620	11785	15350	19419	20289	21125	30171	28954	18819
Kcne3	2.83554	0.273514	1.01651e-21	11314	10057	8611	6344	9020	9305	2108	2274	2504	1846	1841	2110	1147	2235	2259	544	525	709				A730020E08Rik	-3.64049	0.413287	1.18987e-15	15	10	12	15	11	7	59	122	135	79	105	136	127	177	83	92	88	75	28	22	240
Ttc9	5.48537	0.455684	1.09432e-21	4632	4134	4071	3774	5876	5718	11	30	20	57	65	39	368	288	138	474	303	344				Ddah1	-3.25206	0.373632	1.21297e-15	326	311	291	487	707	472	1310	1337	1188	1782	1958	1750	5333	5958	3010	6298	5360	5409	375	461	1755
Rbms3	4.73394	0.417224	1.359e-21	1313	1132	1833	1295	1650	2117	54	71	76	50	48	69	32	71	54	6	0	4				Plekhs1	4.14582	0.427968	1.25158e-15	7312	6345	7087	6237	10084	12756	20	48	30	50	94	61	1840	1007	161	1294	930	779	4596	5240	28
Slc39a5	-9.59388	0.741172	1.66163e-21	1	0	0	0	0	0	4088	4102	2738	3859	4305	4559	51	160	879	1016	1082	419				Tle4	-2.91491	0.337742	1.26704e-15	142	131	171	175	273	168	1979	1780	1916	1754	1878	1930	2090	2291	1229	2314	1694	1471	428	183	1424
Mep1a	-7.92298	0.609849	2.01309e-21	0	0	1	2	0	0	1759	1950	2060	1637	1891	1654	176	261	1891	3051	4510	3081				Alcam	2.18112	0.250951	1.30183e-15	22420	22651	17833	13747	15576	16786	2986	3127	2875	2232	2434	2256	3653	2891	2690	4565	3273	3152	13699	18245	3731
Tmem43	1.59224	0.156075	2.70055e-21	5748	4956	5391	4875	6046	5758	892	933	964	873	1064	942	3315	2401	1365	3001	2260	1941				Reep5	2.33767	0.268028	1.63289e-15	3081	3009	2837	3004	4111	3228	552	655	707	405	501	432	933	775	833	1318	1105	1066	3597	2763	531
Cldn3	-5.27973	0.462254	2.7151e-21	195	166	179	387	412	145	7191	8045	7055	10363	11570	11043	10942	9346	11308	14082	11440	10691				Rgn	-4.21208	0.460521	1.80973e-15	69	74	112	71	58	62	863	875	666	741	865	1051	99	107	179	124	139	97	11	46	652
Ctf1	3.63062	0.354792	2.87104e-21	378	360	300	191	226	238	149	181	117	66	54	73	17	38	101	31	32	27				Muc3	-7.82669	0.754211	1.81441e-15	0	0	0	0	4	2	5898	5320	2731	13180	13045	11755	2215	1450	6296	13933	10065	13611	1	3	3152
Sema3f	6.71553	0.55685	3.38603e-21	7676	7097	9261	5772	7082	7642	196	196	170	26	59	38	51	46	109	78	35	49				Otub2	3.69053	0.417676	1.94729e-15	205	211	183	149	160	234	22	16	23	28	38	29	51	43	82	72	70	67	426	357	59
Slc9a4	4.25327	0.381177	3.44469e-21	14694	15340	8511	10519	10212	9609	295	299	259	371	356	281	1612	850	561	1769	1331	854				Nrp2	2.68803	0.309454	2.09146e-15	1772	1730	1910	1960	1863	2015	100	122	176	96	118	96	234	346	201	3513	3119	2519	2325	2055	303
St8sia6	10.598	0.653474	4.09067e-21	5763	4713	3272	10107	12267	5828	3	3	3	0	3	0	1	3	5	0	1	0				Vamp5	3.81384	0.414583	2.11289e-15	1097	1035	657	825	1087	949	14	19	33	33	31	24	106	71	39	25	23	20	820	660	34
Mindy1	1.58259	0.158252	5.20035e-21	5074	5279	4810	4465	5412	4941	2417	2376	2270	1575	1897	1939	2018	2172	2383	4244	3364	2763				Zdhhc14	-3.05592	0.348948	2.2073e-15	62	48	71	35	50	55	184	192	218	198	213	202	348	354	379	784	460	386	32	31	311
Mettl21a	1.67096	0.166916	5.84769e-21	812	759	662	670	743	715	285	360	281	232	275	253	248	235	275	513	484	400				Ang4	-7.55452	0.729974	2.29132e-15	0	0	0	1	0	0	3495	4054	5142	10463	7764	9685	995	2607	9191	2427	2987	2052	2	3	2941
Marc2	-1.93161	0.190829	6.82923e-21	2725	2756	3101	2930	3134	3345	14725	17865	17305	14424	13975	17009	3219	3473	4685	4786	4359	3551				Slc2a10	4.62246	0.555193	2.33039e-15	475	604	292	196	247	188	133	95	97	33	39	23	16	35	158	14	13	25	985	390	163
Zbtb4	2.33377	0.233735	7.78606e-21	2652	2465	2061	1556	1897	1953	1113	1086	1080	641	721	818	693	535	1262	1279	1301	1317				Nr5a2	-7.66933	0.624	2.40264e-15	0	0	0	0	0	0	1327	1276	1167	830	969	1044	326	549	1170	522	601	691	0	2	1261
Utp14b	-1.6679	0.168074	9.04186e-21	394	440	386	476	558	540	915	1019	943	947	956	953	1463	1326	845	1771	1617	1623				Ppp1r14d	-4.35757	0.482279	2.66869e-15	34	26	18	23	22	17	1542	1800	1604	3164	3421	3099	1450	1538	2593	2871	2629	2292	65	59	1871
Onecut3	7.07569	0.536467	1.0009e-20	1706	1582	1609	993	1191	1122	31	32	25	6	5	10	2	6	5	1	0	0				Sema3f	4.92242	0.563789	2.69573e-15	7676	7097	9261	5772	7082	7642	196	196	170	26	59	38	51	46	109	78	35	49	5500	5750	280
Bmp3	-9.79413	0.750312	1.19107e-20	0	0	0	0	1	0	6935	6736	7615	1351	1619	1821	458	489	1773	509	379	628				Mettl21a	1.40254	0.164863	2.76343e-15	812	759	662	670	743	715	285	360	281	232	275	253	248	235	275	513	484	400	512	575	253
Lrfn1	3.56556	0.343282	1.32065e-20	240	228	198	172	240	251	37	41	37	24	18	26	25	32	42	16	23	22				Ckap4	2.99336	0.340621	3.05796e-15	4159	3845	5033	5654	6000	5463	196	214	150	158	252	217	805	573	548	1034	618	451	3172	4253	329
Plekhs1	4.50873	0.38983	1.98841e-20	7312	6345	7087	6237	10084	12756	20	48	30	50	94	61	1840	1007	161	1294	930	779				Tff2	7.69208	0.875008	4.06995e-15	46036	56603	19183	33574	26116	17360	133	145	167	8	3	7	5	16	22	0	5	1	52695	38351	66
Zfp9	4.18305	0.396097	2.18247e-20	336	256	217	274	212	167	25	17	26	23	27	21	24	29	53	10	10	6				Sec62	1.10164	0.130434	4.23356e-15	6063	5898	5601	5283	5197	5568	3142	3606	3546	2523	2568	2851	3139	2905	3243	3632	3279	2723	5476	5793	3104
Snhg18	4.31126	0.461029	2.1962e-20	575	537	484	208	225	223	543	568	526	155	143	191	1	0	12	60	120	124				Hid1	2.52733	0.289323	4.43618e-15	10978	11485	13993	10943	11549	13488	1224	1375	1273	1766	2131	2039	3877	2851	2238	2469	1756	1654	15036	17524	1854
Vamp5	4.17142	0.378707	2.38221e-20	1097	1035	657	825	1087	949	14	19	33	33	31	24	106	71	39	25	23	20				Pcsk5	-5.31828	0.57057	4.99772e-15	10	13	0	10	9	1	4040	4585	3324	5094	5537	5267	913	830	2255	2065	1512	1470	66	27	4751
Epb41l3	-10.1447	0.782585	2.46087e-20	0	0	0	1	0	0	7127	7497	7802	5721	5686	6669	69	633	2221	0	2	8				Rhobtb2	1.65836	0.195714	5.25241e-15	2336	2224	1950	1539	1915	1918	829	904	889	695	653	715	818	869	699	1180	971	926	2767	2416	967
Abcb1a	-5.3669	0.466611	4.40338e-20	94	64	104	29	82	123	4565	5096	5094	6563	7400	7031	6544	10087	15212	24690	19988	18928				Ms4a18	-7.47957	0.730838	5.32312e-15	1	0	0	1	1	0	1513	1543	1428	3181	3243	3001	463	859	2081	127	209	358	2	2	2321
Acta1	-4.40996	0.402057	4.69483e-20	3	11	16	17	4	5	992	1185	1472	811	948	1032	204	402	1622	855	1244	991				Paqr5	3.32174	0.387951	5.32312e-15	3590	3645	1918	1574	2005	2019	479	518	369	479	392	395	374	295	464	3169	2772	3096	4289	3717	843
Aqp5	9.342	0.548761	5.13088e-20	49559	45735	96068	80780	87325	90704	40	87	43	24	28	38	7	6	1	0	1	0				Gm37145	2.78204	0.319849	6.03096e-15	451	385	375	395	327	358	50	82	73	71	85	71	139	93	79	362	283	263	418	585	70
Abi3	-5.91011	0.516538	5.13811e-20	1	12	3	16	9	2	1136	1258	1070	579	563	600	965	1045	1392	647	657	435				Adgrg2	7.27539	0.664626	8.93343e-15	2266	2750	1207	814	1228	1395	12	7	14	8	7	6	3	3	2	2	0	14	1546	2430	3
Adh6a	-11.0007	0.777893	5.13811e-20	0	0	0	1	0	0	6801	7574	7208	19691	17969	18114	355	445	5723	50	68	36				Pgc	7.02585	0.740354	9.0207e-15	4000	5049	9574	5200	6173	3264	147	245	265	53	30	50	4	36	19	2	1	0	5370	3225	9
Gcg	-8.092	0.75339	5.13811e-20	0	0	0	0	0	0	1277	1032	1947	992	571	599	413	688	3259	45	78	95				Clca4b	-7.78791	0.785137	9.32386e-15	1	5	1	1	4	0	4832	5241	6576	30016	30330	26039	3174	2665	11018	512	452	805	7	13	13626
Spdef	4.2114	0.416338	6.69332e-20	2348	2674	3580	3805	4290	3503	780	754	921	366	461	533	232	457	1558	168	192	133				Ltf	6.98547	0.740395	1.09427e-14	31242	25278	25668	2036	5985	17553	29	26	31	8	18	15	29	17	18	4	20	7	14099	4875	31
Ltbp4	5.43968	0.504733	6.98619e-20	6934	6466	4190	2032	2862	3225	350	369	376	100	104	125	250	194	549	336	292	212				Snx10	1.54827	0.184301	1.12768e-14	1908	1960	1867	2237	2162	2063	941	1088	982	727	721	882	1382	1268	1119	1192	1049	1096	1660	2063	498
Cpne2	3.26659	0.323865	7.74425e-20	936	1020	1057	1159	1537	974	192	182	127	123	152	117	217	247	330	1558	1382	1778				Ripply3	5.20649	0.559107	1.29835e-14	1613	2217	822	500	786	982	30	24	19	19	27	23	117	90	58	38	30	48	2399	1847	23
Dpyd	-7.26414	0.580861	1.2883e-19	0	6	1	5	5	3	3938	3955	4182	4340	3712	4519	40	179	864	0	5	5				Adam28	8.15703	0.772567	1.57068e-14	5544	5712	4846	2497	3401	4534	0	0	0	4	13	13	18	21	13	25	24	54	6219	4990	3
Fabp2	-8.18734	0.617464	1.7408e-19	4	19	4	16	18	9	4383	5393	5095	11746	11390	12383	406	598	1017	111	419	271				Mmd	-5.11451	0.574115	1.98315e-14	1	0	2	10	9	3	990	888	938	462	468	516	417	617	653	224	299	372	7	7	590
Rgma	5.34304	0.489242	2.09615e-19	676	482	406	147	320	380	20	23	18	13	14	19	19	22	38	3	4	1				Agmat	-8.11906	0.73811	2.15726e-14	0	0	0	1	0	0	934	901	900	843	827	1082	37	144	184	0	3	0	2	0	1230
Mmd	-6.36682	0.559279	2.2841e-19	1	0	2	10	9	3	990	888	938	462	468	516	417	617	653	224	299	372				Gm8979	-6.64785	0.663806	2.29141e-14	0	0	0	0	0	0	16154	14492	16491	2258	2572	3845	516	997	4302	1296	1125	1263	5	4	8772
Fxyd3	3.38471	0.33491	2.44513e-19	10440	11240	9294	10427	12219	13138	1471	1552	1638	728	865	805	1669	1656	1532	1263	1037	1130				Defa30	-7.16963	0.716318	2.90985e-14	0	0	0	0	0	0	5856	8425	13169	13410	9040	10988	468	1055	7878	0	10	9	5	5	6321
Pdss1	-3.2688	0.323761	2.79627e-19	140	182	198	279	255	236	3027	2605	2307	2012	2178	2687	872	1369	1252	1053	907	945				Ecscr	3.83947	0.440966	3.01225e-14	1509	1470	2087	2634	2816	2261	89	137	104	39	66	67	804	743	468	1302	1044	859	1725	2924	72
Zc3h12d	-4.11821	0.395312	2.90602e-19	12	13	8	1	4	3	452	508	375	326	378	394	90	153	347	360	450	511				Ly6e	3.1691	0.377851	3.16775e-14	41763	38375	47386	41608	42149	56847	4867	5533	4410	2840	2501	2827	7515	6931	6153	17100	10687	7527	15161	18521	2407
Ltf	9.06891	0.645538	3.0356e-19	31242	25278	25668	2036	5985	17553	29	26	31	8	18	15	29	17	18	4	20	7				Defa28	-6.68676	0.686522	3.37931e-14	0	0	0	0	0	0	1340	1863	2187	2289	1837	2172	231	472	2456	0	3	2	1	4	1809
Muc6	13.0877	0.661908	3.48014e-19	29149	30011	59664	36572	40600	27562	1	0	1	1	0	2	2	2	0	0	1	2				C1qtnf6	4.19982	0.505021	3.38567e-14	894	1012	1172	1406	1791	1302	85	91	65	92	104	95	28	39	116	284	356	231	847	1165	115
0610040J01Rik	1.01855	0.107288	3.57093e-19	3715	3891	3463	3783	3867	3770	2131	2328	2046	1928	2053	2249	1720	1913	2002	3264	2953	2773				Rgl3	4.29374	0.514268	3.86131e-14	2582	2485	2399	1526	1447	1887	56	66	53	22	39	35	113	56	71	1189	1409	1133	2357	2632	203
Sidt1	2.85769	0.296506	4.47216e-19	2037	2249	1618	1386	1159	1307	624	535	615	325	428	462	565	706	1133	534	868	818				Epn3	2.43827	0.288436	4.18795e-14	3752	3968	3084	2844	3633	3272	1167	1289	1043	917	1070	866	3030	2208	1425	2598	1800	1686	5768	3754	570
Abhd11os	-7.58017	0.615621	4.62369e-19	1	5	0	8	8	3	873	1111	838	2218	2162	2063	991	702	1672	1717	1941	1349				Clrn3	-5.021	0.565266	4.20438e-14	7	24	7	18	1	4	2153	2454	2491	3818	3480	3487	1289	1446	2112	2331	2295	2027	53	30	2558
4930452B06Rik	6.67691	0.537353	4.75036e-19	408	367	366	336	363	370	7	6	5	0	4	1	0	0	0	0	1	1				Tmem123	1.75354	0.213826	4.29318e-14	4016	3846	3609	3304	4021	4190	1281	1224	1376	882	928	1002	1330	1396	1245	1693	1339	1246	4605	3859	1540
Ddit4l	4.3076	0.399707	6.23282e-19	1239	1109	1201	843	1531	1711	16	31	32	23	31	23	213	132	62	56	53	23				Ephx4	5.35015	0.580843	4.43763e-14	243	219	172	241	271	258	2	4	1	4	6	1	18	9	13	2	8	5	169	230	1
Slc4a5	-5.18188	0.451832	6.64151e-19	20	19	3	6	1	11	1886	1883	1668	1515	1352	1682	13	14	65	10	8	8				Serinc3	-1.76498	0.213641	4.66536e-14	10266	10480	13002	12846	11622	11258	43489	42544	44873	37629	39597	42921	34459	39075	43401	29316	30354	28284	7661	7147	40123
Lurap1	3.07549	0.316414	7.43428e-19	376	333	378	264	270	308	106	92	108	54	42	64	86	86	148	21	21	14				Wdr45	2.38196	0.28937	6.11032e-14	1404	1403	1035	917	1139	1136	419	519	470	268	265	299	394	325	331	466	403	337	1310	1482	303
Ceacam18	-9.14051	0.734276	9.74084e-19	0	1	0	0	1	0	891	863	739	1921	1939	1662	165	125	466	340	406	336				Plcb3	-1.62148	0.196893	6.14913e-14	7154	7611	7309	6051	6199	6519	37599	41386	40153	38418	43065	45997	18823	24025	36484	29833	26239	24221	8167	9090	46087
Neurog3	-6.20718	0.579257	1.13692e-18	3	4	0	1	1	0	331	373	362	187	254	325	56	170	161	22	13	13				Gm5609	5.05665	0.54557	1.09028e-13	195	172	203	190	161	193	0	0	0	0	0	0	6	5	2	150	142	178	207	275	11
Ms4a18	-9.35286	0.716485	1.37774e-18	1	0	0	1	1	0	1513	1543	1428	3181	3243	3001	463	859	2081	127	209	358				Gngt2	-3.06761	0.374863	1.18387e-13	2	3	2	8	0	0	516	626	554	407	429	389	515	527	805	292	231	269	6	20	176
Triqk	4.91426	0.476675	1.40209e-18	365	345	215	177	106	170	42	32	49	11	28	24	12	8	56	8	10	13				Mgam2-ps	-7.3911	0.848144	1.20972e-13	24	9	36	335	87	11	2477	2471	2711	3410	3683	3743	4066	4067	2861	6518	4135	5086	2	1	3306
Smim14	2.03047	0.21345	1.47498e-18	6884	6761	5989	7660	6959	6069	1815	1837	1734	1776	1995	2016	2155	1882	2523	2557	2168	1857				Acacb	4.30177	0.523536	1.36115e-13	1391	1595	2771	1703	1045	1140	179	212	140	90	66	68	56	34	89	717	1001	1703	1146	1302	113
Slc27a2	-9.46616	0.729597	1.76027e-18	0	2	1	0	0	0	5956	6799	7413	1622	1718	2490	271	592	1137	1	7	6				Abat	-6.25296	0.670276	1.62393e-13	0	4	0	1	0	8	1318	1170	857	777	1014	1098	36	104	225	1217	761	384	8	2	1636
Slc41a1	1.90891	0.203547	2.51394e-18	2083	1879	2384	1900	2108	2363	890	899	879	562	635	821	929	968	1213	1672	1627	1397				Oplah	2.96787	0.372568	1.63389e-13	1477	1510	1048	651	805	944	695	743	566	866	619	722	299	299	936	806	823	820	797	1375	486
Slc2a10	4.7763	0.490443	2.5318e-18	475	604	292	196	247	188	133	95	97	33	39	23	16	35	158	14	13	25				Exph5	1.67855	0.212476	1.89792e-13	1180	1256	1136	927	783	831	726	862	1078	607	578	615	891	1100	1753	2346	2220	2140	1116	1199	772
Creb3l3	-9.80454	0.70276	2.90885e-18	4	3	0	1	5	2	1716	1979	1364	10267	10475	9838	162	74	177	407	179	239				Gprc5c	5.30505	0.659369	1.92097e-13	1829	1628	2949	597	1369	2236	196	176	282	28	34	36	3	5	44	2	3	0	661	1741	75
Ackr3	7.59902	0.613554	3.03372e-18	1235	1072	952	389	761	1039	5	12	6	0	1	0	12	8	9	3	2	3				Dhrs3	2.21583	0.278039	2.89874e-13	3292	3696	2717	3259	3290	4811	1723	1923	1835	1241	1360	1408	784	681	1136	1500	1532	1364	3507	3086	1312
Tesc	6.35825	0.527465	3.03372e-18	1044	1233	946	1002	1020	870	19	20	33	4	5	9	7	5	6	3	2	2				Tmem41a	-1.76602	0.221511	3.0295e-13	271	300	280	287	331	230	1248	1204	1243	1243	1386	1350	752	851	842	641	527	534	250	426	1134
Eda	7.47838	0.623133	3.10136e-18	176	197	113	57	57	82	2	2	3	0	1	2	1	1	0	1	0	0				Ablim1	2.08299	0.255741	3.398e-13	10940	11249	12166	13712	16556	14284	1555	1691	1482	2416	2136	2200	5072	4544	2399	17189	13111	11768	12153	10967	1557
Rab11fip5	4.50907	0.417467	4.14612e-18	2032	1786	2212	1554	3527	2788	7	27	16	10	24	33	1877	899	225	777	540	386				Themis3	-5.43744	0.618155	3.98897e-13	38	35	11	36	19	9	1033	1275	997	2405	2345	1993	1211	845	2399	1616	1457	1368	12	15	1262
Naglu	1.41943	0.153519	4.27161e-18	1595	1667	1598	1314	1480	1582	824	988	844	596	674	714	829	783	948	1390	1329	1265				Lrg1	9.07045	0.777924	4.49946e-13	4303	4831	4008	1072	1354	2095	1	3	1	2	0	1	0	2	0	15	6	9	1770	2723	1
Ephx4	5.70329	0.526157	5.6736e-18	243	219	172	241	271	258	2	4	1	4	6	1	18	9	13	2	8	5				Tcf4	2.02405	0.255086	5.08361e-13	2165	2553	2246	1784	2180	2143	816	775	848	427	530	581	780	1044	771	1362	1138	1037	3131	3296	774
C1qtnf6	4.63296	0.456812	5.71702e-18	894	1012	1172	1406	1791	1302	85	91	65	92	104	95	28	39	116	284	356	231				Malrd1	-6.89186	0.692943	5.97507e-13	0	1	0	0	0	0	2495	2902	3329	2045	1794	1992	390	691	3184	104	106	246	0	3	1321
Plcb3	-1.84446	0.195599	6.17785e-18	7154	7611	7309	6051	6199	6519	37599	41386	40153	38418	43065	45997	18823	24025	36484	29833	26239	24221				Pde5a	-1.81278	0.228803	6.73494e-13	680	725	680	820	911	784	4097	4518	4457	4055	4203	4475	3001	3590	4809	5631	5249	5790	901	995	3665
Pdzrn3	5.51608	0.528069	6.1973e-18	1511	1474	1552	1884	2363	2570	122	124	153	51	35	62	18	35	101	128	62	41				Pkig	-1.89983	0.239852	7.02369e-13	436	482	407	460	538	438	1192	1240	1037	1246	1298	1375	784	996	1025	1062	954	1062	221	327	1384
Ptges	7.194	0.609406	6.92563e-18	7057	6224	6089	1667	2232	2335	31	78	15	41	65	47	78	23	295	142	165	72				Tmem63a	1.52111	0.194289	7.28122e-13	6320	7050	6219	6515	6315	5827	2496	2497	2334	1749	2077	2277	3480	3197	2929	4689	4130	3552	6810	5500	2699
Abca5	4.46008	0.441562	7.41824e-18	1279	1076	1406	728	802	926	63	131	140	50	49	60	56	37	75	46	55	40				Pml	1.12587	0.144132	7.38953e-13	3245	3238	3384	3045	3681	3650	1729	1797	1683	1337	1300	1490	2010	1902	1682	2130	1735	1691	3256	3314	1465
Rilpl1	4.25935	0.422459	7.69313e-18	331	373	298	244	259	432	20	16	25	10	16	24	55	36	50	34	59	47				Chad	8.60282	0.845862	7.85031e-13	374	398	207	300	334	284	10	8	5	0	0	0	0	2	0	0	0	0	279	547	0
Chp2	-9.09151	0.696258	9.66955e-18	1	4	0	0	0	0	2444	2605	2624	4830	4549	4648	95	177	887	3621	2455	1396				St3gal5	4.72105	0.565313	8.15536e-13	696	650	476	335	501	514	16	30	29	5	5	8	9	7	8	0	0	0	361	407	37
Cst3	1.09457	0.120762	1.43406e-17	2989	3244	3065	2749	3276	3182	2327	2537	2405	1843	1963	1996	1360	1443	1995	2055	1975	1781				Nox1	-7.39513	0.80982	8.45258e-13	3	2	0	0	1	2	78	111	125	526	565	523	1692	2079	2535	6393	4460	1509	4	5	733
Prkar2b	4.33753	0.430589	1.79418e-17	738	744	1229	950	714	895	71	70	95	46	60	47	111	56	153	4	5	2				Cep85l	5.45069	0.580923	9.71307e-13	142	161	93	128	110	88	1	2	3	3	0	0	2	2	4	2	1	1	155	172	4
Erlec1	1.31102	0.144771	1.88084e-17	3433	3491	3220	2580	2643	2858	1931	1969	1884	1673	1622	1771	1554	1427	2014	2512	2424	2254				Baiap2l2	-2.84249	0.356249	9.82351e-13	614	618	879	590	946	457	6805	6548	6615	4242	5283	6296	3780	5153	4383	3611	1827	1655	558	498	4242
Fa2h	5.96166	0.559635	1.98085e-17	825	1058	344	345	265	217	8	11	18	14	9	11	42	19	74	2393	2104	2474				Ltbp3	4.52785	0.549576	1.12149e-12	10221	8831	8597	2552	4024	6473	132	151	142	60	94	45	356	253	182	344	291	192	4750	5180	174
Cdh3	4.14555	0.404871	2.18563e-17	1520	1230	1460	841	1703	1891	86	55	57	38	56	58	73	61	45	65	50	30				Clec2h	-7.81872	0.773846	1.14054e-12	0	1	1	0	0	0	1555	2258	1638	5035	4653	3952	667	698	5896	3431	2605	2123	1	2	3932
Kif19a	5.80448	0.540885	2.51996e-17	1332	1250	2516	913	660	1062	32	53	60	12	39	24	49	29	86	48	75	38				Ms4a12	-5.22044	0.566582	1.16582e-12	0	1	0	0	0	0	437	463	479	374	335	395	93	138	301	494	449	342	4	0	294
Tff1	9.36436	0.652398	2.62433e-17	24835	45842	6488	11648	20506	9387	8	16	35	8	7	8	8	26	4	0	0	0				Bach2	4.63129	0.570571	1.30116e-12	209	208	272	185	152	208	45	48	71	7	20	20	19	17	57	11	6	10	194	562	21
Scn2b	-5.26392	0.5078	2.75881e-17	1	1	7	10	1	10	333	413	321	395	414	483	395	491	939	409	417	261				Xpnpep2	-6.25344	0.667602	1.38094e-12	1	7	5	6	10	6	734	673	566	734	789	793	237	379	1381	294	438	651	0	4	912
Wnt3	-7.63529	0.761497	2.75881e-17	0	0	0	0	1	0	165	227	275	283	286	321	177	324	521	3	2	2				Insyn1	3.33192	0.426451	1.61089e-12	456	403	286	239	387	370	16	23	29	27	23	25	37	46	50	68	65	84	115	109	23
Hook1	-2.77291	0.296448	2.79518e-17	3179	3084	3824	4063	3628	3368	16609	16397	15836	21600	21635	25883	17767	23766	16931	18451	15176	14431				Ets2	-1.2881	0.167521	1.6677e-12	4088	4298	4029	4460	5911	5184	7950	8388	8769	7091	8119	8091	15731	14639	11392	16056	14063	14049	3431	3859	7867
Pde5a	-2.00573	0.216405	2.84529e-17	680	725	680	820	911	784	4097	4518	4457	4055	4203	4475	3001	3590	4809	5631	5249	5790				Shisa5	1.83709	0.239388	1.71621e-12	8878	8914	7557	5371	6551	7132	3814	3762	3130	2493	2628	2830	3787	2880	4321	5793	5409	5849	9312	8245	4339
Cd14	3.96536	0.406464	3.13174e-17	4903	3725	3287	1481	2913	3272	284	347	376	161	222	210	669	485	640	1573	1306	1273				Sgce	7.9595	0.728241	1.72822e-12	763	495	686	164	320	272	4	0	1	0	0	0	0	0	0	0	0	2	510	1097	2
0610005C13Rik	-6.19112	0.535716	3.39962e-17	5	9	5	2	2	4	1096	1059	1072	1462	1277	1454	5	19	49	279	329	288				Med13l	1.3201	0.172594	1.8821e-12	4103	4036	3579	3311	3575	3206	2196	2445	2752	1582	1673	1863	2124	1964	2658	2478	2068	2376	4329	4817	2576
Galnt11	1.39054	0.154741	3.39962e-17	1411	1258	1279	1008	1146	1188	767	910	842	561	606	647	574	589	780	1015	926	864				Cd14	3.28036	0.416024	2.0106e-12	4903	3725	3287	1481	2913	3272	284	347	376	161	222	210	669	485	640	1573	1306	1273	2332	2511	211
Dach1	-7.65503	0.666944	3.81464e-17	0	0	4	2	0	0	1361	1262	1582	460	442	614	526	828	1035	27	36	68				Mtmr10	1.20554	0.155438	2.0106e-12	1574	1501	1453	1610	1706	1647	458	468	535	406	455	474	1111	850	466	828	776	639	1876	1848	508
Man1c1	5.44098	0.513378	3.81536e-17	403	399	205	154	245	388	15	15	16	12	8	15	11	3	25	14	9	7				Oat	-2.27585	0.282229	2.15146e-12	5633	5257	6838	4682	4524	5458	73939	83697	92073	65431	57462	73226	7227	13736	46899	3676	3653	3572	2817	4623	62629
Btg2	1.96876	0.215083	4.19277e-17	9810	9900	8401	6583	9260	8723	2024	2144	2156	2083	2429	2422	2523	2176	2299	3589	3136	2420				Dgkz	-1.00345	0.130769	2.25989e-12	4743	4910	4540	4319	4542	4593	12368	12928	12447	9495	10562	11234	7393	9825	9203	10578	9526	9780	4977	5866	16829
Adamtsl4	3.31082	0.331401	4.79287e-17	3157	2906	2299	2422	4377	3008	63	67	45	65	102	83	1231	498	174	555	388	388				Pim3	1.53017	0.197988	2.39518e-12	2470	2614	2295	2979	3336	2570	1108	1312	1302	1118	1319	1337	1975	1770	1442	1853	1685	1560	4978	4321	1547
Arhgap44	5.20851	0.485523	4.98743e-17	3666	3493	3123	2431	2713	2715	39	54	29	84	109	85	59	93	78	9	8	6				Acta1	-4.13711	0.489252	2.40634e-12	3	11	16	17	4	5	992	1185	1472	811	948	1032	204	402	1622	855	1244	991	13	17	1769
Guca2a	-7.70143	0.637928	5.23247e-17	2	3	0	1	4	4	1153	1380	1300	3331	2560	2145	1245	2714	7217	1078	1997	2361				Fer1l4	5.84352	0.651669	2.40634e-12	6545	7487	4093	3240	3450	4026	25	32	13	80	125	90	248	205	129	926	1043	734	7574	5447	47
Rnase1	-7.51404	0.655194	5.85726e-17	0	1	4	0	0	1	1540	1587	2166	518	646	761	24	69	108	61	98	93				Adh6a	-7.6214	0.786554	2.45383e-12	0	0	0	1	0	0	6801	7574	7208	19691	17969	18114	355	445	5723	50	68	36	1	6	8402
Gm5609	7.92374	0.776801	6.01893e-17	195	172	203	190	161	193	0	0	0	0	0	0	6	5	2	150	142	178				Gm45912	-7.40563	0.709934	2.45383e-12	0	0	0	0	0	0	2004	1837	2629	689	719	994	219	398	898	436	357	372	0	2	1343
Gramd1a	3.60006	0.367794	6.87201e-17	1704	1557	1721	1148	1795	2318	143	129	157	78	87	109	160	109	98	29	23	16				Arhgap23	3.03092	0.372739	2.91137e-12	756	747	622	622	934	759	24	50	22	22	46	25	413	301	106	87	98	78	1281	1015	67
Proc	4.16422	0.434487	8.55308e-17	308	330	278	101	222	212	41	56	46	26	34	27	9	18	40	40	35	25				Bmp3	-5.75514	0.648329	3.037e-12	0	0	0	0	1	0	6935	6736	7615	1351	1619	1821	458	489	1773	509	379	628	12	6	2947
Slc30a10	-6.55241	0.553465	9.2243e-17	16	11	20	10	5	1	5513	5825	4788	6110	5056	5637	1621	1183	10447	329	401	816				Calr3	4.22837	0.540303	3.04102e-12	487	502	257	296	166	166	73	100	82	30	27	25	40	32	58	52	28	36	545	794	79
Lrrc19	-8.89201	0.790249	1.12746e-16	0	0	0	0	0	0	658	719	794	1662	1541	1557	57	97	456	3218	2800	1674				Mtcl1	3.77011	0.463559	3.24256e-12	3073	3282	2103	1456	1538	1757	107	109	106	71	161	71	457	339	255	449	420	352	2717	3184	87
Mylk3	-6.48466	0.624238	1.14065e-16	1	1	0	0	4	1	413	392	382	203	180	242	18	21	30	0	1	0				Abcg8	-6.99416	0.74017	3.67381e-12	5	7	3	0	0	1	4122	4412	3823	6744	6614	7569	176	632	2783	14	28	12	1	6	4317
Lgmn	2.26594	0.251511	1.21216e-16	6993	5883	5503	4408	3921	4175	1488	1792	1659	1497	1525	1658	1217	1194	1625	1709	1650	2031				Dapk1	4.51525	0.549625	3.67381e-12	1592	1344	1161	839	1324	1145	29	59	62	23	27	14	30	17	18	94	40	60	1197	658	53
Entpd8	-3.48614	0.362103	1.26849e-16	124	183	212	180	292	181	4221	3939	3579	2077	2471	2326	2872	2950	3592	4611	4680	4700				Capsl	5.16372	0.654817	3.74717e-12	342	311	320	169	399	374	21	35	42	12	4	5	36	42	45	18	27	16	218	390	16
Apbb2	-1.88062	0.212241	1.55154e-16	364	331	303	325	551	413	829	863	826	808	807	834	1450	1313	751	806	625	728				Plcd3	2.54815	0.32528	5.10194e-12	2130	1895	1993	1609	1779	1894	247	377	236	364	389	312	1078	733	484	2396	1801	1741	2320	1726	237
Abcg8	-8.1436	0.645156	1.5931e-16	5	7	3	0	0	1	4122	4412	3823	6744	6614	7569	176	632	2783	14	28	12				Slc5a11	-7.7782	0.878213	5.40113e-12	0	1	0	0	0	1	110	155	166	485	383	447	4	4	0	0	0	0	0	0	175
Galnt12	1.61348	0.18236	1.60759e-16	2323	2820	2732	2939	2587	2511	1223	1391	1264	1033	1136	1181	1739	1981	2463	3345	3372	3671				Utp14b	-1.3942	0.185921	5.44795e-12	394	440	386	476	558	540	915	1019	943	947	956	953	1463	1326	845	1771	1617	1623	556	731	1150
Pls3	1.8568	0.205557	1.72353e-16	6019	5133	5208	4750	6284	6389	873	958	844	981	1185	1151	5138	4100	3021	6205	4894	4523				Plekhh2	3.67854	0.441437	5.62124e-12	616	530	591	460	864	799	11	18	13	17	15	20	14	24	13	93	90	48	353	365	20
Tldc2	-7.99617	0.806899	1.89792e-16	0	0	0	0	0	0	214	251	170	380	381	382	26	45	92	82	84	90				Neurog3	-6.38455	0.695138	5.87889e-12	3	4	0	1	1	0	331	373	362	187	254	325	56	170	161	22	13	13	2	1	284
Fmnl3	3.56343	0.371587	2.00777e-16	1178	1035	1226	1005	1695	1209	95	88	104	61	90	62	91	184	88	114	142	123				Gas6	4.014	0.589683	5.88241e-12	14501	17743	7945	2883	3420	5504	10341	11231	9436	2065	1719	2333	1477	2291	9191	9521	8603	6594	10709	24281	5711
Slc13a1	-9.02585	0.806854	2.0419e-16	0	0	0	0	0	0	911	1436	1368	2083	1610	1743	40	136	469	124	252	506				Pof1b	2.10714	0.280634	6.64042e-12	2803	3044	2047	1655	1859	1872	1717	1720	1714	1640	1876	1632	1165	1296	2165	3474	3016	2467	5241	4011	2153
Fam171a2	3.49608	0.37407	2.28465e-16	546	601	646	317	699	715	94	94	62	55	69	64	102	128	162	60	67	39				Aspa	5.07851	0.595994	6.79594e-12	2082	2259	1639	1141	789	1298	48	56	47	170	166	147	356	463	276	258	213	167	2282	3189	40
Dab1	-4.69368	0.462856	2.60288e-16	10	2	5	0	1	2	783	790	681	403	399	460	11	13	68	0	0	0				Anks6	3.076	0.413877	7.01795e-12	387	438	298	242	244	254	126	146	131	41	40	50	29	26	68	6	15	10	375	401	152
Ninj1	1.77499	0.201316	2.91959e-16	1588	1641	1461	1086	1368	1193	607	670	613	447	414	550	442	543	517	853	831	678				Zbtb4	1.83038	0.248185	7.21208e-12	2652	2465	2061	1556	1897	1953	1113	1086	1080	641	721	818	693	535	1262	1279	1301	1317	1402	1346	1059
Trove2	1.31676	0.150508	3.45822e-16	1328	1244	1134	1236	1381	1254	594	687	700	492	481	541	943	885	961	1117	947	941				Ccl25	-2.90449	0.361215	7.30201e-12	191	167	178	133	153	140	9143	9846	11375	8594	8282	9511	488	896	4244	189	192	173	196	299	6644
Ecscr	4.01872	0.41286	4.19801e-16	1509	1470	2087	2634	2816	2261	89	137	104	39	66	67	804	743	468	1302	1044	859				Trf	6.07815	0.713466	7.58145e-12	5392	4920	13467	3690	3812	3167	20	30	20	1	4	3	3	2	5	3	2	0	5914	13086	54
Nags	-7.69604	0.680361	4.19801e-16	1	0	0	0	0	4	995	1044	995	1215	1422	1531	42	116	422	6	17	10				Adgrg6	7.13467	0.809569	7.73496e-12	3338	3151	3708	2231	4936	5194	6	17	8	2	3	1	18	2	11	263	139	11	2253	2363	4
Defa23	-9.97288	0.831147	4.46578e-16	0	0	0	0	0	0	1547	2630	3474	5886	4148	5207	171	409	2589	0	4	7				Tvp23b	1.18097	0.159109	8.36128e-12	2134	1932	2027	1931	1788	1882	1368	1585	1431	1265	1271	1417	971	846	1480	1865	1844	1603	2181	2299	1710
Abat	-6.91984	0.615597	4.51537e-16	0	4	0	1	0	8	1318	1170	857	777	1014	1098	36	104	225	1217	761	384				Apbb2	-1.78064	0.239551	8.73017e-12	364	331	303	325	551	413	829	863	826	808	807	834	1450	1313	751	806	625	728	421	348	1015
Clec2e	-9.7729	0.73791	4.96991e-16	1	0	2	0	0	0	2021	1769	2287	6967	6330	6253	654	518	3369	791	848	1121				Pld3	1.72724	0.231004	8.8162e-12	3903	4005	3480	2883	4016	3633	1317	1248	998	885	1058	1009	921	753	960	1300	1186	1080	3654	2791	1427
Sytl1	3.3039	0.361054	5.48634e-16	2644	2211	1819	1161	1348	1290	249	292	310	230	279	252	338	286	476	647	501	307				Ern2	3.50626	0.467176	9.04108e-12	5843	7245	4424	3862	3040	3154	1572	1421	1556	475	594	634	574	756	1548	1174	1031	484	7276	9298	1502
Mrps22	-1.13437	0.130951	5.56596e-16	681	643	619	679	750	633	1237	1198	1241	1210	1157	1367	1175	1237	949	1145	919	992				Myo7b	-5.99152	0.72696	9.42355e-12	23	28	42	305	60	24	15783	16067	15533	15439	17084	17502	15790	13542	18088	14950	11760	12607	77	117	17543
Ltbp3	5.7005	0.535157	6.2485e-16	10221	8831	8597	2552	4024	6473	132	151	142	60	94	45	356	253	182	344	291	192				Naxe	1.11175	0.150512	9.62705e-12	2822	2742	2270	1997	2171	2441	1612	1780	1622	1049	1125	1431	1124	1060	1521	2093	1835	1664	2192	2503	1893
Cryl1	-1.89015	0.212481	6.58574e-16	836	809	912	876	860	1012	5205	5313	4689	4713	4991	5417	1725	2250	3166	3815	3403	3018				Acot1	-3.4732	0.453486	9.89997e-12	108	105	165	202	239	153	341	326	230	304	393	564	151	173	85	38	67	74	121	228	931
Maoa	-5.64406	0.540425	7.51807e-16	184	224	235	336	252	257	4226	4808	4750	14670	16059	15424	6873	4538	4686	25070	24351	16494				Tmem253	-4.10898	0.51799	1.01828e-11	40	46	30	36	26	35	1128	1025	832	2101	2489	2254	1068	716	1249	2731	2968	1990	63	67	1613
Insc	-6.0342	0.582807	7.79038e-16	8	1	4	3	1	1	257	276	208	492	445	480	199	212	326	113	99	123				Gldc	6.56008	0.68838	1.05456e-11	613	961	343	1390	1499	914	4	14	7	22	21	12	7	15	12	3	1	3	3022	1238	3
Osbpl6	-4.18072	0.428192	8.13012e-16	76	45	52	60	33	36	1283	1369	1473	1645	1505	1643	324	352	572	225	105	77				Fabp2	-6.0712	0.719397	1.09002e-11	4	19	4	16	18	9	4383	5393	5095	11746	11390	12383	406	598	1017	111	419	271	82	16	7219
Epb42	-4.75768	0.496786	8.4712e-16	6	4	4	4	5	1	121	148	141	114	114	170	17	40	21	3	7	3				Fndc3b	1.75176	0.235708	1.13202e-11	8214	8048	10252	6664	8634	8770	1903	2030	2146	1316	1510	1568	2316	1951	2629	2484	1857	1834	5647	7425	2137
Tmed9	1.36442	0.156781	8.53989e-16	6920	6628	7927	7906	9103	8103	2555	2811	2642	2081	2292	2469	4333	4028	3221	4156	3749	3527				Prdm5	7.71838	0.786588	1.19107e-11	425	310	445	260	219	307	0	1	0	0	0	0	0	0	0	1	1	0	200	264	1
Sgsm3	1.24692	0.143369	8.81364e-16	4664	5253	4276	4836	5353	4495	1210	1351	1291	1319	1521	1514	3758	3958	2419	5524	4335	4336				Pitx2	-8.76635	0.696328	1.19149e-11	0	1	0	0	1	0	812	580	688	752	745	795	628	800	782	1	0	0	1	0	971
Rab12	2.29041	0.256555	9.38899e-16	1348	1221	1060	1335	1760	1646	273	259	233	194	233	188	417	370	311	494	459	370				4930452B06Rik	5.79763	0.571299	1.24469e-11	408	367	366	336	363	370	7	6	5	0	4	1	0	0	0	0	1	1	357	222	5
Mlph	2.22566	0.2537	9.92697e-16	10273	12170	5916	8149	9229	9134	2935	3143	3100	2226	2514	2344	3062	2669	3756	3897	3305	3287				Cyp3a41b	-3.00939	1.02996	1.24469e-11	0	0	0	1	0	0	11	23	21	29	26	15	0	0	11	3	1	2	0	0	1
Gm44220	9.19708	0.770418	1.06793e-15	209	203	222	106	84	91	0	0	0	0	0	0	0	0	1	0	0	0				Glb1l2	5.11491	0.624941	1.3227e-11	754	905	555	193	241	321	0	2	3	0	0	3	4	3	5	0	1	3	337	436	18
Hs3st3b1	4.72388	0.473721	1.14988e-15	1324	1574	1210	873	710	853	23	27	32	23	24	35	110	251	74	287	201	313				Prom2	5.72657	0.690607	1.67783e-11	348	466	433	461	374	344	0	6	0	6	7	3	31	14	40	51	59	30	944	202	8
Ly6e	3.47434	0.375022	1.23385e-15	41763	38375	47386	41608	42149	56847	4867	5533	4410	2840	2501	2827	7515	6931	6153	17100	10687	7527				Tubb2b	-2.81984	0.395719	1.93691e-11	296	271	297	317	720	358	228	242	227	518	518	570	837	568	151	295	208	272	168	144	232
Plekhh2	4.67217	0.454309	1.23547e-15	616	530	591	460	864	799	11	18	13	17	15	20	14	24	13	93	90	48				Tor4a	1.25314	0.171279	1.99744e-11	2759	2604	2732	2520	2840	2872	1566	1610	1359	1150	1353	1347	1370	1209	1774	2473	2195	1963	2597	2413	1404
Rasgrp1	9.20158	0.783532	1.31999e-15	405	404	380	408	518	370	0	0	0	0	0	0	1	1	0	0	0	0				Fa2h	4.8	0.664757	2.04649e-11	825	1058	344	345	265	217	8	11	18	14	9	11	42	19	74	2393	2104	2474	1922	1335	162
Gimd1	-8.59233	0.746817	1.3427e-15	0	0	0	0	3	0	516	563	616	939	1178	1212	96	293	335	0	2	3				Tyro3	2.46561	0.340531	2.21657e-11	2679	2721	1578	1224	1873	1884	889	951	830	386	362	489	274	378	519	322	300	295	2055	2633	975
Clec2h	-9.30905	0.740204	1.38103e-15	0	1	1	0	0	0	1555	2258	1638	5035	4653	3952	667	698	5896	3431	2605	2123				Syngr1	2.25855	0.306427	2.27473e-11	4620	4909	4054	3196	3148	3311	1669	1816	1582	1613	1778	1876	505	741	798	449	347	452	4496	3363	1562
Tmem253	-5.20476	0.507506	1.50407e-15	40	46	30	36	26	35	1128	1025	832	2101	2489	2254	1068	716	1249	2731	2968	1990				Jak3	3.1316	0.436072	2.61594e-11	2200	2285	3184	1448	1474	1967	731	842	855	313	306	388	255	230	451	888	867	735	2208	5058	1247
Glod5	-5.64931	0.530108	1.50526e-15	3	9	7	4	5	2	1041	1077	1068	1561	1445	1526	96	123	839	496	554	502				Lypd6b	4.88963	0.643408	2.61594e-11	367	617	136	109	108	93	37	32	38	15	10	12	19	26	28	45	32	26	1181	1036	55
Glb1l2	8.32212	0.681599	1.58838e-15	754	905	555	193	241	321	0	2	3	0	0	3	4	3	5	0	1	3				Uggt2	3.16286	0.430044	2.61594e-11	336	324	269	262	270	233	115	117	86	34	41	52	28	28	51	120	145	62	319	409	116
Tor4a	1.39842	0.163689	1.74821e-15	2759	2604	2732	2520	2840	2872	1566	1610	1359	1150	1353	1347	1370	1209	1774	2473	2195	1963				Samd4	3.71123	0.467095	2.68684e-11	638	586	657	668	827	925	28	30	41	22	45	31	295	99	66	37	24	45	343	328	13
Trf	8.60668	0.638724	1.74821e-15	5392	4920	13467	3690	3812	3167	20	30	20	1	4	3	3	2	5	3	2	0				Alox15	6.80214	0.849009	2.70171e-11	21	30	53	88	55	48	18	17	34	2	1	4	5	6	25	3	2	3	1466	270	11
Eml1	7.41291	0.581653	1.98231e-15	1969	2215	1974	1733	2069	2078	38	35	22	3	7	10	1	2	6	1	2	1				Itih5	-5.19134	0.613634	2.73078e-11	5	6	13	5	4	2	456	367	355	245	361	311	1432	903	2974	15166	10998	7008	3	12	1950
Cerkl	5.8811	0.545507	2.03872e-15	185	197	120	48	37	69	18	14	23	10	2	6	0	2	10	1	1	0				St8sia6	6.89892	0.779606	2.76223e-11	5763	4713	3272	10107	12267	5828	3	3	3	0	3	0	1	3	5	0	1	0	7919	672	8
Habp2	3.78166	0.423411	2.23551e-15	2390	2654	3623	1995	2397	2178	695	687	1072	420	371	425	64	218	377	0	0	0				Osbpl5	2.25513	0.302351	2.996e-11	2295	2267	1909	1561	2528	2259	397	463	506	468	524	404	1310	939	873	1406	1112	896	2841	2050	507
Cadm4	4.2163	0.442911	2.37752e-15	922	1060	709	372	734	849	26	35	35	41	56	63	108	101	124	138	149	163				Mansc1	1.97788	0.272936	3.15293e-11	1446	1517	1738	1624	1496	1547	1115	1069	1002	491	605	618	632	728	1141	1310	1348	1080	1348	1415	588
Gm14851	-8.52321	0.810522	2.64622e-15	0	0	0	0	0	0	844	804	1319	1130	904	1251	6	17	121	0	1	0				Rasgef1b	2.03764	0.270282	3.23343e-11	2151	2228	1659	1873	1904	1819	366	412	329	495	547	403	921	752	369	1023	921	788	3029	2509	384
Ghr	2.26234	0.271937	2.82104e-15	1854	1571	1750	1017	1414	1500	1875	1870	2125	1400	1008	1243	89	201	686	344	261	283				Mov10	-1.84524	0.250263	3.23825e-11	499	448	338	284	410	426	1217	1181	1187	941	1198	1124	604	534	604	434	307	325	381	592	1809
Slc14a1	-7.50854	0.806787	3.03422e-15	0	0	0	0	0	0	123	172	336	242	244	282	607	1254	2197	1	3	0				Rnase1	-5.96879	0.692628	3.25467e-11	0	1	4	0	0	1	1540	1587	2166	518	646	761	24	69	108	61	98	93	1	5	655
Cd9-ps	1.85902	0.214781	3.08693e-15	3565	3693	3331	3682	4194	3841	645	805	669	810	941	904	1961	1955	1617	5142	4127	3491				Il1r1	4.60525	0.547612	3.25597e-11	543	625	346	281	439	776	2	12	11	6	6	5	77	55	13	93	107	103	1865	1755	39
Clca4b	-10.3637	0.729174	3.60502e-15	1	5	1	1	4	0	4832	5241	6576	30016	30330	26039	3174	2665	11018	512	452	805				Rfx2	2.53838	0.345593	3.26643e-11	419	410	303	234	349	339	125	140	128	43	80	114	60	57	97	54	56	38	302	479	107
Car5b	5.0419	0.500007	4.24149e-15	540	511	467	316	395	478	4	6	3	8	10	5	76	30	24	145	73	67				Pdzrn3	4.03159	0.549094	3.41231e-11	1511	1474	1552	1884	2363	2570	122	124	153	51	35	62	18	35	101	128	62	41	1581	1543	126
Trim13	2.48081	0.280132	4.53927e-15	504	515	361	472	629	513	58	84	69	44	63	61	142	146	92	97	68	58				Ssx2ip	-2.658	0.355947	3.50526e-11	602	581	588	572	829	731	2409	2551	2239	3772	3481	3931	1601	2221	2272	2782	2972	2730	465	521	3001
Itih5	-4.647	0.481116	4.61761e-15	5	6	13	5	4	2	456	367	355	245	361	311	1432	903	2974	15166	10998	7008				Kif19a	4.77315	0.632126	3.62826e-11	1332	1250	2516	913	660	1062	32	53	60	12	39	24	49	29	86	48	75	38	291	1834	58
F5	6.14258	0.555424	4.6943e-15	2491	3018	3455	3008	4452	4494	92	100	65	33	40	17	8	6	11	2	11	7				Phactr2	2.75534	0.375457	4.00324e-11	1168	1221	1036	669	733	1007	283	328	409	169	199	183	219	179	271	198	281	264	884	1626	255
Slc5a11	-9.11633	0.786714	5.14844e-15	0	1	0	0	0	1	110	155	166	485	383	447	4	4	0	0	0	0				D16Ertd472e	5.57173	0.677277	4.21963e-11	301	323	244	267	345	284	35	41	55	10	6	11	0	4	4	7	17	2	315	356	16
Cd302	-5.32375	0.524628	5.30393e-15	3	4	7	1	2	1	831	871	909	484	522	600	9	37	92	0	10	5				A1cf	-8.44063	0.7199	4.29612e-11	0	0	0	0	1	0	1413	1477	1581	1913	2022	2024	292	365	833	290	470	445	0	1	1492
Aldob	-11.3003	0.720831	5.87267e-15	3	15	14	9	2	1	66551	71402	78740	350473	317155	340136	1508	3620	26682	654	387	231				Ush1g	8.24321	0.821438	4.29612e-11	1088	952	1533	262	510	1435	1	2	1	0	0	0	0	0	0	0	0	0	364	1788	2
Ccl6	-5.94149	0.565181	6.36417e-15	2	3	2	5	1	1	1541	1593	3294	969	617	656	229	400	2376	305	302	269				Lmo4	1.96397	0.268445	4.40026e-11	2896	3281	2514	2408	2739	3682	1324	1198	1007	700	806	842	1047	987	907	799	660	577	3784	4140	1247
Orai3	1.75147	0.208972	6.46224e-15	554	602	590	476	488	488	350	343	274	244	263	293	253	217	435	421	480	361				Vsig10	1.322	0.185826	4.44799e-11	2305	2261	1771	1537	1649	1712	2603	2816	2984	1437	1676	1834	1706	1898	3565	3963	3642	3164	2046	2804	2554
Banp	1.63814	0.19553	7.10191e-15	1320	1243	1308	1072	1275	1197	792	789	633	502	620	627	481	418	761	872	778	663				Cenpv	-1.60776	0.220426	4.49434e-11	528	548	477	730	692	596	2750	2706	2837	2011	2084	2611	1203	1448	1612	1429	1182	1127	653	745	2722
Sox2	10.5938	0.769812	7.2891e-15	1410	1680	1311	724	575	1121	0	1	0	0	0	0	1	1	0	0	1	0				Dhx40	1.19702	0.166116	4.62396e-11	2641	2579	2074	1877	1998	2019	1477	1410	1482	1131	1303	1325	1464	1392	1668	1612	1355	1361	2010	2726	1147
Zfp750	5.69436	0.539836	8.79408e-15	967	910	962	789	1138	1224	0	1	3	2	18	4	146	90	31	475	350	236				Dach1	-5.04398	0.622959	4.76485e-11	0	0	4	2	0	0	1361	1262	1582	460	442	614	526	828	1035	27	36	68	6	14	775
Cacnb3	1.29671	0.155379	9.42547e-15	2434	2419	1929	2067	2675	2261	1133	1214	993	903	921	1028	2156	1984	2189	3617	2885	2754				Orai3	1.34571	0.188524	4.79009e-11	554	602	590	476	488	488	350	343	274	244	263	293	253	217	435	421	480	361	505	592	429
Slc22a17	6.49507	0.598784	9.74701e-15	2046	1662	1183	292	500	693	57	63	63	8	14	9	3	3	18	4	2	3				E2f2	-3.05662	0.413932	4.99566e-11	50	67	78	50	95	70	1120	993	833	952	1371	1399	741	1240	836	1290	945	1037	285	139	2194
Erich2	4.61497	0.493094	9.76459e-15	233	224	210	147	108	131	20	18	6	15	7	10	18	15	31	9	10	20				Basp1	3.68501	0.459674	5.04323e-11	6208	6053	6588	4305	6800	8019	11	19	16	24	40	20	433	179	80	218	144	76	4178	6899	142
Sec62	1.17342	0.141153	1.01607e-14	6063	5898	5601	5283	5197	5568	3142	3606	3546	2523	2568	2851	3139	2905	3243	3632	3279	2723				Adtrp	-4.95434	0.623219	5.08756e-11	5	8	15	23	0	4	1203	1348	1283	1300	1330	1386	318	469	758	735	1163	1261	9	5	496
Yipf2	1.68245	0.200292	1.10214e-14	2784	2598	2391	2376	2294	2302	957	1060	873	710	831	896	1188	852	1141	1374	1188	931				Gramd1a	2.82975	0.375255	5.40899e-11	1704	1557	1721	1148	1795	2318	143	129	157	78	87	109	160	109	98	29	23	16	812	1313	105
Itga5	3.34627	0.386906	1.19383e-14	1298	1266	780	1215	1525	1169	389	446	267	189	205	264	174	247	554	43	47	81				Cryz	1.85695	0.258669	5.58035e-11	907	846	974	743	787	790	214	250	169	187	182	154	156	166	190	1179	1092	931	625	1097	392
Adtrp	-5.92985	0.560571	1.29837e-14	5	8	15	23	0	4	1203	1348	1283	1300	1330	1386	318	469	758	735	1163	1261				Col23a1	5.22468	0.744095	5.68574e-11	16	13	4	2	2	6	6	11	14	2	1	6	0	0	6	1	8	6	27	42	6
Plcb1	3.97889	0.459196	1.4152e-14	326	286	706	309	258	326	136	112	122	74	51	66	33	70	241	10	6	7				Gif	5.93195	0.791981	6.23379e-11	6873	2998	1059	494	653	416	11	28	28	3	1	2	0	0	1	0	0	0	1049	1862	20
Arhgap23	3.14624	0.345562	1.72366e-14	756	747	622	622	934	759	24	50	22	22	46	25	413	301	106	87	98	78				Abcg2	-4.4947	0.5645	7.03742e-11	18	43	34	69	30	66	2015	2177	2113	3043	3312	3041	673	848	2228	1019	1029	743	33	81	2791
Arntl2	2.40993	0.278339	1.74655e-14	1253	1281	1141	882	1046	1339	172	195	153	138	136	147	403	350	209	277	204	288				Il6st	1.97474	0.273627	7.55865e-11	5201	5873	4802	3282	3890	4253	1375	1529	1704	898	964	1198	1794	1748	1495	2406	2138	2181	4316	4736	1126
Zbtb7c	5.98994	0.595454	1.75371e-14	349	570	250	144	239	358	7	8	11	3	0	1	31	13	27	241	224	252				Rpia	-1.05462	0.148451	8.42511e-11	1265	1374	1237	1560	1449	1336	2529	2811	2545	2475	2722	3084	2226	2507	1956	2155	1761	1508	1554	1703	2978
Ptprs	2.41948	0.286602	1.89566e-14	8192	7706	9191	6239	9564	10228	2677	2958	3204	1590	1766	2167	2347	2791	3329	1892	2135	1739				Sgsm3	1.06723	0.148845	8.42511e-11	4664	5253	4276	4836	5353	4495	1210	1351	1291	1319	1521	1514	3758	3958	2419	5524	4335	4336	6222	5494	1746
Cdhr5	-8.07546	0.651802	1.90081e-14	12	48	29	74	9	5	8807	9484	9338	27492	26043	25704	7467	6931	12022	25962	24754	25496				Zfp750	4.71019	0.562473	8.42511e-11	967	910	962	789	1138	1224	0	1	3	2	18	4	146	90	31	475	350	236	1272	997	11
Tnfsf15	-6.45925	0.687614	1.94951e-14	1	0	0	0	1	0	29	34	55	66	73	59	159	147	93	397	287	363				Adamtsl4	2.61388	0.342178	9.12402e-11	3157	2906	2299	2422	4377	3008	63	67	45	65	102	83	1231	498	174	555	388	388	1463	1336	58
Gm7334	1.82379	0.214689	2.04492e-14	354	345	338	342	436	359	46	73	63	56	60	72	160	166	88	114	84	87				Gm6212	2.3556	0.331932	9.14477e-11	285	315	322	209	224	259	111	100	119	72	53	62	28	47	76	46	44	19	172	233	76
Cyp3a25	-10.0921	0.832995	2.52988e-14	0	0	0	1	0	0	1016	1301	1144	4697	4236	4393	13	28	85	0	1	2				Gimd1	-7.2434	0.795383	9.59612e-11	0	0	0	0	3	0	516	563	616	939	1178	1212	96	293	335	0	2	3	0	2	547
Pros1	3.8784	0.439134	2.60588e-14	636	593	368	216	358	379	85	76	108	70	68	87	10	9	43	404	287	188				Rnf144b	4.3	0.563899	9.59612e-11	1325	1320	851	499	520	598	219	156	265	48	86	78	16	10	16	4	3	3	1147	968	105
Foxn2	-1.56406	0.189524	2.67764e-14	384	435	358	504	419	401	1050	1102	1224	992	1020	1079	1059	1318	916	906	753	662				Tac1	-5.92481	0.676893	9.76723e-11	0	2	0	0	0	0	860	1078	1637	421	362	499	20	54	236	51	41	25	2	2	1544
Slc12a4	3.89223	0.40877	2.89424e-14	1177	947	802	789	1388	1041	15	32	12	27	34	28	163	156	46	81	97	51				Ceacam18	-7.78821	0.811142	9.93323e-11	0	1	0	0	1	0	891	863	739	1921	1939	1662	165	125	466	340	406	336	0	0	993
Creb3l4	3.32089	0.390336	2.89702e-14	1378	1651	1901	2264	1883	1775	625	549	591	240	251	321	206	295	596	270	277	209				Gnai1	4.84743	0.63134	1.006e-10	925	900	847	1395	1356	1155	18	14	35	5	9	2	18	5	22	189	146	72	1574	1071	40
Zfp260	1.10061	0.134961	2.89702e-14	2692	2545	2633	2357	2153	2356	1690	1671	1868	1377	1399	1483	1589	1585	1971	2009	1799	1607				Arhgef3	1.69988	0.23469	1.06314e-10	3223	3113	3445	3192	3431	3193	372	404	347	433	475	415	2093	1525	879	2106	1500	1303	2029	3044	463
Wfdc2	6.19452	0.581173	2.99761e-14	31577	29353	23459	17622	24723	28674	247	413	85	116	244	81	879	2480	882	10932	6873	2681				Tex15	5.50154	0.61764	1.10531e-10	258	224	327	199	302	389	0	0	0	2	3	4	6	1	6	5	7	3	280	265	2
Mtcl1	4.03751	0.435519	3.05595e-14	3073	3282	2103	1456	1538	1757	107	109	106	71	161	71	457	339	255	449	420	352				Wipf1	-3.07951	0.415473	1.10531e-10	123	119	183	85	112	113	672	663	572	860	850	996	811	986	972	899	1010	1386	61	68	786
Kbtbd11	4.50092	0.522079	3.47377e-14	3356	3125	5496	3001	2250	3170	729	1089	931	559	492	465	68	45	593	576	1996	3014				Tmem87a	1.02568	0.144527	1.1315e-10	2837	3051	2645	2795	3050	2988	1784	1865	1886	1334	1602	1545	2668	2457	1965	3209	2829	2494	4112	3837	1696
Naxe	1.41884	0.174572	4.11187e-14	2822	2742	2270	1997	2171	2441	1612	1780	1622	1049	1125	1431	1124	1060	1521	2093	1835	1664				Cdh3	2.95587	0.393625	1.14032e-10	1520	1230	1460	841	1703	1891	86	55	57	38	56	58	73	61	45	65	50	30	771	1042	72
Slc6a7	-7.14887	0.757852	4.1403e-14	0	0	0	0	0	1	397	340	282	86	145	148	118	223	215	141	135	123				Wfdc2	4.74819	0.641606	1.17886e-10	31577	29353	23459	17622	24723	28674	247	413	85	116	244	81	879	2480	882	10932	6873	2681	23198	29111	866
Creld1	1.96407	0.232424	4.29363e-14	1757	1509	2014	1773	1609	1593	241	266	212	255	300	319	619	511	316	331	311	279				Wars	1.75493	0.244085	1.21485e-10	13350	14863	11510	17152	19268	19641	4272	4638	4282	3786	4505	4679	8638	7990	6853	7071	5789	5429	25764	19383	5807
F2r	6.69419	0.580109	4.29363e-14	3490	2383	3984	2910	7150	8214	2	5	2	7	22	18	302	143	61	45	29	19				Cebpd	3.1253	0.440796	1.26663e-10	911	894	506	261	619	690	167	229	259	94	97	99	99	108	202	268	236	245	562	584	116
Mapk8ip1	2.88344	0.342903	4.66199e-14	386	345	307	167	299	253	101	89	85	54	55	66	55	61	89	51	65	76				Srl	-1.92954	0.269146	1.26663e-10	202	166	181	179	264	213	386	451	403	360	390	482	392	547	465	462	444	450	91	175	500
Gm6212	2.91092	0.348509	5.08972e-14	285	315	322	209	224	259	111	100	119	72	53	62	28	47	76	46	44	19				Blnk	-1.69233	0.236823	1.29053e-10	840	936	811	952	859	864	2773	2912	2862	1954	2035	2027	2660	2635	2350	6217	5659	5595	700	470	2301
Ripply3	5.16342	0.522237	6.33164e-14	1613	2217	822	500	786	982	30	24	19	19	27	23	117	90	58	38	30	48				Pros1	2.99792	0.433331	1.33534e-10	636	593	368	216	358	379	85	76	108	70	68	87	10	9	43	404	287	188	159	189	82
Lamb1	3.57414	0.404808	6.4708e-14	3381	2782	3625	1308	2617	2880	243	430	280	298	339	291	371	266	486	48	42	28				Itga5	2.60866	0.374721	1.36378e-10	1298	1266	780	1215	1525	1169	389	446	267	189	205	264	174	247	554	43	47	81	817	871	416
Numbl	4.11287	0.442749	6.6032e-14	564	560	398	255	458	471	26	34	24	13	18	21	33	36	22	23	12	8				Slc5a1	-6.20904	0.752372	1.45267e-10	2	3	6	11	0	6	16882	20758	20120	84970	69481	77907	1990	3326	12023	1936	2437	1942	63	53	28469
Arl3	1.29058	0.16001	6.88693e-14	741	636	635	533	627	578	368	422	420	291	333	309	375	367	461	463	437	383				Slc25a15	-2.4806	0.344269	1.47755e-10	656	743	754	860	852	884	5955	6269	5794	8718	8096	9214	1372	2157	2272	1121	945	937	987	997	6963
Cck	-7.20933	0.68462	7.10236e-14	3	1	0	0	0	0	1396	1460	2060	701	546	552	99	92	601	7	12	8				Gm26801	3.61705	0.51789	1.54367e-10	55	76	52	34	34	27	57	38	42	14	14	19	17	16	56	84	70	65	102	60	25
Serinc3	-1.55039	0.18928	7.37729e-14	10266	10480	13002	12846	11622	11258	43489	42544	44873	37629	39597	42921	34459	39075	43401	29316	30354	28284				Cdk19	1.48463	0.210858	1.56206e-10	3755	4007	4351	3498	3010	3067	1452	1560	1511	1061	1247	1148	2084	1849	1929	3155	2593	2596	3038	3969	1365
Sult6b2	-9.74631	0.83851	7.93224e-14	0	0	0	0	0	0	799	1320	1632	2610	2061	2111	2	7	30	0	0	3				Rilpl1	3.25811	0.450661	1.56998e-10	331	373	298	244	259	432	20	16	25	10	16	24	55	36	50	34	59	47	229	406	50
Paqr5	3.0243	0.358153	8.24359e-14	3590	3645	1918	1574	2005	2019	479	518	369	479	392	395	374	295	464	3169	2772	3096				Myh7	5.04721	0.786562	1.5773e-10	131	162	76	50	61	60	49	52	65	3	4	5	3	7	21	1	1	0	653	222	55
Appl2	2.1955	0.266774	9.19168e-14	12145	12159	15674	12184	9314	11630	3811	4056	3770	2857	2761	2848	3605	2768	3680	9504	7893	6971				Prss8	1.03843	0.148356	1.61981e-10	3576	3876	3245	3238	3260	3156	2825	2976	2591	1983	2204	2345	1417	1311	1766	1474	1360	1072	3731	3579	2304
Epdr1	3.28148	0.373603	9.41803e-14	809	600	765	904	1109	1032	76	72	104	105	83	114	172	201	231	1	1	0				Snx33	2.39189	0.33461	1.62032e-10	1531	1471	1163	967	1020	1049	300	342	344	180	196	181	617	523	449	694	604	575	1309	1022	217
Sept5	-4.47519	0.48298	9.70151e-14	69	80	130	182	185	167	2987	2521	1707	3409	4008	4252	2998	2888	3748	2278	1728	2176				Ldhd	3.50566	0.469981	1.68952e-10	7477	7494	3249	2684	2659	3258	825	847	534	676	675	624	898	598	541	819	611	581	5313	4902	441
Gfi1	-6.26197	0.676663	9.73889e-14	0	0	1	0	1	0	162	183	200	85	109	124	114	200	292	13	15	15				Lrrc8e	2.824	0.399176	1.77615e-10	833	815	605	528	394	393	169	193	123	81	94	82	125	128	141	442	451	400	1561	1224	368
4930404N11Rik	4.57067	0.488054	1.16041e-13	163	178	229	141	175	155	16	13	12	5	11	6	4	11	12	12	3	10				Kirrel	4.89822	0.555325	1.78933e-10	592	584	714	581	948	683	2	3	11	9	28	12	68	25	10	105	55	40	860	1369	8
Xpnpep2	-5.04615	0.518215	1.22669e-13	1	7	5	6	10	6	734	673	566	734	789	793	237	379	1381	294	438	651				Bcam	4.1659	0.593748	2.25999e-10	14413	14854	10753	7321	8852	9923	1821	2269	2263	349	498	501	949	1060	1310	1048	755	371	9136	13444	1200
Slc25a15	-2.97068	0.347787	1.31165e-13	656	743	754	860	852	884	5955	6269	5794	8718	8096	9214	1372	2157	2272	1121	945	937				Glns-ps1	3.60551	0.526557	2.31348e-10	2182	2490	1451	871	845	1127	629	644	711	159	182	226	178	204	408	1596	1235	761	1244	2599	364
Otub2	3.3011	0.387477	1.31606e-13	205	211	183	149	160	234	22	16	23	28	38	29	51	43	82	72	70	67				Pcolce	4.037	0.50843	2.35047e-10	511	664	682	991	1477	1257	92	83	61	45	78	62	340	169	88	174	110	92	1428	4390	73
Crip2	3.83394	0.402914	1.36713e-13	3556	3504	3743	5752	8441	6654	41	85	50	67	94	76	1348	595	186	488	291	149				Chrm1	3.43366	0.518822	2.37879e-10	113	128	84	71	74	72	51	63	61	11	13	19	3	15	49	3	3	6	58	106	64
Laptm4a	1.33439	0.166938	1.37391e-13	13815	12788	10460	10867	14322	14234	6980	7195	7271	5767	5825	6750	6357	6004	7938	9187	8342	8318				Zfp467	2.78306	0.417013	2.39746e-10	654	836	633	292	235	352	606	623	551	269	276	251	200	166	634	288	286	286	984	1450	990
Tmem182	-6.31054	0.683654	1.50855e-13	0	0	2	0	0	0	153	167	161	78	74	107	54	71	85	74	88	74				Aff1	1.14323	0.164767	2.47295e-10	3765	4143	3016	2857	3609	3752	3029	3283	3259	2278	2495	2503	3290	3116	3561	3397	3133	3377	3872	4720	2750
AY761184	-7.85638	0.813127	1.53397e-13	0	0	0	0	0	0	683	649	650	755	467	812	12	69	319	0	0	0				Lurap1	2.55823	0.369117	2.57365e-10	376	333	378	264	270	308	106	92	108	54	42	64	86	86	148	21	21	14	142	320	76
Sdc1	1.77942	0.218357	1.57028e-13	37340	30588	40021	31450	43191	44089	8526	9869	8728	9340	9934	9577	14591	12238	11884	15562	13237	12291				Cryl1	-1.86573	0.26197	2.6231e-10	836	809	912	876	860	1012	5205	5313	4689	4713	4991	5417	1725	2250	3166	3815	3403	3018	506	1011	4737
Snph	-6.32576	0.683337	1.58515e-13	0	0	0	0	0	2	271	231	213	144	153	180	51	57	178	24	29	9				Cd302	-4.87027	0.610868	2.63419e-10	3	4	7	1	2	1	831	871	909	484	522	600	9	37	92	0	10	5	4	3	505
Gpr155	-3.59401	0.4101	1.59957e-13	58	62	69	56	74	66	475	512	484	806	673	831	31	49	29	31	34	39				Camk1d	-2.56144	0.3563	2.72664e-10	866	752	772	701	894	969	5571	5597	5497	4255	4884	5527	4624	6472	6587	3051	2212	1062	1131	695	8004
Slc44a2	2.38471	0.284271	1.7188e-13	7716	7960	7739	6266	6966	7345	1148	1213	825	732	856	866	2872	2092	1327	2062	1710	1129				Dap	2.21321	0.312621	2.86475e-10	6942	6822	6273	4766	4743	4442	1852	1964	1551	2123	2324	2045	1421	926	1356	4967	4195	3624	6329	6077	1479
Inha	7.96069	0.624288	1.96218e-13	556	457	571	203	317	317	2	7	1	0	1	0	0	2	1	1	1	0				Rab12	1.75451	0.249434	2.9147e-10	1348	1221	1060	1335	1760	1646	273	259	233	194	233	188	417	370	311	494	459	370	954	1224	293
Podxl	4.50407	0.482836	1.96218e-13	5025	4528	7258	6192	11527	9984	553	387	392	313	261	226	149	81	170	10	7	9				CT010496.1	6.01054	0.827346	2.97512e-10	71	48	56	16	18	18	0	1	0	0	0	0	0	1	6	1	2	2	30	36	1
Ppargc1b	-1.51263	0.188225	2.10327e-13	191	224	213	158	164	174	667	594	649	563	539	615	310	394	324	815	707	685				Tmem43	1.30154	0.185315	3.07121e-10	5748	4956	5391	4875	6046	5758	892	933	964	873	1064	942	3315	2401	1365	3001	2260	1941	4622	4375	1196
Dapk1	4.90751	0.505765	2.17501e-13	1592	1344	1161	839	1324	1145	29	59	62	23	27	14	30	17	18	94	40	60				Zfp532	5.58486	0.801615	3.07689e-10	519	520	616	66	283	401	48	51	25	1	2	3	3	4	14	9	11	6	256	1474	15
Cyp2c68	-8.25475	0.730095	2.30244e-13	2	0	1	0	0	0	1238	1278	1279	1795	1757	2000	19	73	319	332	197	105				Clec2e	-6.30056	0.752546	3.09764e-10	1	0	2	0	0	0	2021	1769	2287	6967	6330	6253	654	518	3369	791	848	1121	3	8	3723
C3	5.74687	0.56875	2.43059e-13	2425	1243	2171	350	1257	1226	18	26	22	26	45	18	27	23	35	39	62	57				Camsap2	2.64989	0.360897	3.2105e-10	1903	2000	1937	1729	2073	1802	61	87	92	142	172	146	684	630	343	1354	842	659	2137	1739	107
Gprc5c	5.75861	0.608896	2.44476e-13	1829	1628	2949	597	1369	2236	196	176	282	28	34	36	3	5	44	2	3	0				Grin1os	2.10455	0.302743	3.28973e-10	141	179	141	131	162	213	154	157	97	110	115	108	228	231	322	213	194	208	270	286	123
Ace2	-8.45806	0.674745	2.78123e-13	8	3	0	4	3	4	3045	3832	4294	13786	12405	12006	237	584	3712	83	65	70				Ces2e	-5.33084	0.661633	3.39398e-10	43	50	19	112	116	54	17583	17008	13832	24018	24954	25186	1116	1505	6517	3283	5827	5162	175	77	21279
Cpd	1.56491	0.196929	2.81564e-13	12457	14909	13555	15481	15325	14851	5765	6177	6214	5952	5966	6017	5646	6972	8101	10967	8434	8040				Cck	-6.77885	0.719008	3.57209e-10	3	1	0	0	0	0	1396	1460	2060	701	546	552	99	92	601	7	12	8	2	0	2118
Ces2e	-6.56529	0.589024	2.9471e-13	43	50	19	112	116	54	17583	17008	13832	24018	24954	25186	1116	1505	6517	3283	5827	5162				Gsto1	3.18163	0.436299	3.77789e-10	204346	209329	101004	81306	94016	138815	10807	11959	11152	14137	14949	14613	9959	10282	8858	18818	15045	13168	159670	104876	9663
Nfatc2	1.99182	0.244508	2.97386e-13	1261	1297	1242	1101	1611	1510	288	330	288	191	228	226	517	539	348	717	460	495				Rasgrp1	7.19772	0.739282	3.91181e-10	405	404	380	408	518	370	0	0	0	0	0	0	1	1	0	0	0	0	383	332	1
Kif3c	3.18212	0.375301	3.04057e-13	472	584	638	455	681	634	73	95	79	45	38	72	183	106	158	163	99	119				Mfge8	2.71819	0.384681	3.94351e-10	10422	11130	10400	11697	13067	14155	3267	3655	3420	1679	1806	1680	1640	1653	1505	950	750	506	9616	13433	2162
Gm43697	-7.1369	0.802883	3.08587e-13	0	1	0	0	0	0	152	123	87	179	189	162	78	69	155	0	1	0				B630019K06Rik	2.83727	0.405106	4.35851e-10	88	110	86	82	95	88	25	38	29	11	18	16	14	9	28	8	26	23	119	144	46
Prdm5	9.27187	0.769541	3.09373e-13	425	310	445	260	219	307	0	1	0	0	0	0	0	0	0	1	1	0				Kbtbd11	3.42595	0.535958	4.35851e-10	3356	3125	5496	3001	2250	3170	729	1089	931	559	492	465	68	45	593	576	1996	3014	4073	4320	2018
Synj2	1.19041	0.151247	3.33194e-13	2187	2411	2564	1965	2060	2119	1147	1212	1175	909	984	1138	1879	1794	1859	3544	2800	2642				Mfsd4a	2.75928	0.401494	4.80398e-10	4813	5246	4642	2645	1957	2926	1565	1773	2226	1409	1334	1249	1445	1282	2225	12888	7989	5581	2727	3112	877
D930020B18Rik	4.322	0.487543	3.38808e-13	213	209	192	191	116	135	50	44	66	19	14	30	5	3	26	8	11	2				Maoa	-4.20138	0.583357	4.85488e-10	184	224	235	336	252	257	4226	4808	4750	14670	16059	15424	6873	4538	4686	25070	24351	16494	227	619	7384
Irs1	4.62922	0.495972	3.46136e-13	940	976	732	704	1302	1371	13	26	58	23	16	28	269	139	149	175	182	103				Plet1	4.13862	0.587392	5.12677e-10	1344	1339	677	285	340	479	37	57	44	41	53	43	76	59	119	43	61	80	288	331	20
Prom1	2.25362	0.278292	3.70888e-13	68450	68146	84967	53381	48227	61707	16098	17314	17360	12393	13632	13586	22455	15888	18704	41426	37622	41121				Tmie	2.85262	0.415452	5.27562e-10	1091	1025	639	374	482	616	398	507	431	525	427	489	110	127	267	282	248	227	1026	665	294
Ddah1	-2.8345	0.350548	4.37876e-13	326	311	291	487	707	472	1310	1337	1188	1782	1958	1750	5333	5958	3010	6298	5360	5409				Tdrd12	-2.26783	0.330908	5.34993e-10	45	38	59	57	51	49	72	57	71	48	67	58	137	151	68	104	63	67	45	33	84
Bsg	3.0191	0.367928	4.5238e-13	258502	220915	266847	152595	108321	146086	42746	50531	32332	40320	38358	40200	26806	21112	42305	53955	59230	49884				Hsd3b3	-6.05704	0.716976	5.78553e-10	0	0	0	0	0	0	90	81	90	38	55	45	92	87	168	922	1148	1752	3	0	433
Disp1	1.78359	0.223792	4.5743e-13	1227	1372	987	1025	1296	1214	364	479	425	278	315	308	484	468	432	532	374	377				Dennd5b	-1.98374	0.283092	5.92092e-10	166	129	136	129	149	145	1089	980	1033	1004	1060	1111	454	671	1023	396	235	349	192	212	1160
Pea15a	2.39831	0.288319	4.81892e-13	2821	3384	3114	2328	3882	3632	390	356	360	269	302	240	1232	935	452	1573	1216	1184				Slc22a17	4.13867	0.620913	5.97064e-10	2046	1662	1183	292	500	693	57	63	63	8	14	9	3	3	18	4	2	3	369	404	73
Defa37	-7.50638	0.804613	5.01939e-13	0	0	0	0	0	0	539	655	911	891	653	764	59	155	1484	0	1	2				Degs1	1.57647	0.228759	6.0762e-10	5727	5247	6368	5213	5972	5466	1426	1510	1667	1322	1449	1566	1483	1280	1129	1947	2273	2722	5721	5111	1794
Ank	-3.58	0.412124	5.02309e-13	315	274	425	532	382	209	4377	4557	4112	5927	5343	5986	2141	2012	2641	3394	4109	3982				Trib2	4.51632	0.663263	6.28679e-10	216	202	262	174	283	333	38	32	23	1	6	4	17	16	50	7	9	5	266	266	30
Mypop	2.56114	0.315752	5.39519e-13	291	253	204	194	260	249	42	41	45	43	68	62	57	71	89	226	191	178				Sytl4	1.67625	0.246051	7.19429e-10	394	419	340	346	355	467	210	206	213	119	149	154	122	168	160	95	82	97	435	560	257
Fmo4	-5.5107	0.555251	5.82306e-13	9	9	1	9	2	4	619	603	787	869	884	986	20	41	95	7	13	3				Ggcx	1.80552	0.263755	7.21094e-10	1098	1174	981	1072	1164	1004	486	484	447	219	271	307	314	318	301	266	241	215	1091	1109	399
CT010496.1	7.50308	0.794354	6.23257e-13	71	48	56	16	18	18	0	1	0	0	0	0	0	1	6	1	2	2				Phldb1	2.28173	0.33863	8.05958e-10	3603	4037	2388	1489	2005	2053	2191	2223	2144	1037	1256	1633	497	588	908	2446	1894	1456	2673	2950	1304
Arhgef40	3.00064	0.3577	6.32795e-13	3511	3220	2488	3012	4091	4084	353	358	267	318	389	355	2214	1303	1739	3626	2370	1481				Tmed9	1.09892	0.161745	8.12888e-10	6920	6628	7927	7906	9103	8103	2555	2811	2642	2081	2292	2469	4333	4028	3221	4156	3749	3527	5806	6640	2805
Maf	-5.3207	0.55114	6.74257e-13	6	4	3	15	8	8	639	717	688	781	576	528	276	138	588	363	244	121				Cbarp	2.32511	0.341852	8.41041e-10	998	893	692	494	834	785	332	304	234	139	155	167	217	171	252	217	176	151	507	652	196
B4galt5	-2.25295	0.276038	7.32336e-13	371	304	479	274	349	281	2214	2436	3018	2484	2583	2689	1170	1352	1961	2106	1933	1751				Dhrs4	-2.06586	0.299866	8.41041e-10	750	907	835	782	860	752	4345	4894	4269	4957	5219	6260	792	1569	1300	1191	1286	1151	1059	1144	4535
H2-DMb1	5.27037	0.585726	7.34169e-13	230	157	194	121	118	126	10	14	9	6	2	3	22	21	55	18	22	85				Cbr2	5.71432	0.775341	8.46115e-10	312	419	351	157	33	47	7	5	2	13	16	9	53	20	80	10279	14339	10130	4327	1541	37
Vps13c	1.94833	0.250711	7.34928e-13	2213	2281	1647	1865	1771	1434	1018	1124	1356	723	796	904	1331	1624	2836	3024	2035	1803				1600014C10Rik	-2.96538	0.418113	8.77028e-10	302	257	265	280	452	418	462	489	569	599	659	754	234	210	246	394	432	385	419	521	2112
Rbp2	-9.14793	0.709966	7.53959e-13	2	11	10	0	16	12	5156	7467	5764	30815	29566	30163	335	423	823	155	177	139				Gm12892	-5.51764	0.766429	8.88759e-10	27	30	52	208	298	173	1029	1068	856	3783	3640	3914	317	509	353	379	365	290	9	22	1542
Slc36a4	2.62763	0.323521	7.76765e-13	513	510	434	388	425	460	71	81	77	82	70	67	484	352	396	191	204	326				Sema3c	2.40807	0.340793	9.01125e-10	7221	7074	5528	5730	6407	5994	430	521	493	693	880	662	6816	3963	3325	9411	7596	5701	7908	5515	711
Btnl6	-7.45087	0.662043	8.03417e-13	2	6	2	2	0	0	1116	1352	1269	3093	2734	2743	136	171	1212	860	1113	1286				Zc3h12d	-4.42184	0.57318	9.62509e-10	12	13	8	1	4	3	452	508	375	326	378	394	90	153	347	360	450	511	1	4	287
Lhpp	-2.18295	0.264485	8.04478e-13	176	189	165	120	150	167	2653	2712	2919	1403	1435	1722	514	765	1427	232	251	317				Dagla	1.57674	0.233821	9.9991e-10	867	900	1010	733	753	901	516	558	565	462	493	438	399	419	572	166	152	85	825	1140	577
Gnai1	6.14834	0.601143	8.12381e-13	925	900	847	1395	1356	1155	18	14	35	5	9	2	18	5	22	189	146	72				Cavin2	7.94097	0.745468	1.00037e-09	2233	2287	2702	2535	2341	3058	2	10	16	1	5	2	12	7	0	3	0	0	4056	2822	1
Acot2	-2.43047	0.305009	8.42575e-13	63	70	87	87	80	65	214	263	212	220	247	319	118	83	54	77	98	79				Gcg	-6.57926	0.712565	1.11773e-09	0	0	0	0	0	0	1277	1032	1947	992	571	599	413	688	3259	45	78	95	1	1	2510
Brpf3	-1.6955	0.213323	8.52809e-13	1096	1252	909	643	799	910	4646	4422	4317	3733	4217	4544	3144	3477	4104	5380	4626	4262				Rnf32	-3.15066	0.441404	1.13129e-09	95	88	44	59	35	50	971	1004	1142	540	482	638	674	970	773	817	905	658	36	55	514
Slco2b1	-8.1609	0.720705	8.606e-13	0	1	0	3	0	0	2077	1897	1703	2296	2447	2972	7	18	155	7	23	30				Tmbim1	1.44114	0.212567	1.16707e-09	13246	12647	11375	9999	12228	11582	5073	5153	4908	4562	5076	5507	7632	6153	5531	11935	9051	7953	16445	12265	5575
St3gal5	5.50673	0.552451	9.49021e-13	696	650	476	335	501	514	16	30	29	5	5	8	9	7	8	0	0	0				Epb42	-5.65526	0.71274	1.26823e-09	6	4	4	4	5	1	121	148	141	114	114	170	17	40	21	3	7	3	1	2	72
Cd9	1.83493	0.231334	9.62697e-13	9466	10451	8651	10427	11829	10706	1880	2228	1818	2337	2522	2587	5642	5342	4639	13744	11001	9006				Defa23	-7.25996	0.823625	1.35642e-09	0	0	0	0	0	0	1547	2630	3474	5886	4148	5207	171	409	2589	0	4	7	1	2	2546
Cyp4f14	-7.6255	0.637893	9.68442e-13	29	37	34	23	26	35	6560	6993	5874	37025	32352	31393	769	1376	4763	2515	2928	3643				Peli2	4.3848	0.742681	1.35642e-09	186	175	108	27	26	41	54	87	68	12	4	13	14	35	66	2	1	3	278	857	65
Dnajc18	1.53042	0.197183	9.95189e-13	929	903	823	810	711	826	427	444	466	286	301	337	408	434	449	512	404	470				Slc44a2	2.10619	0.306003	1.35642e-09	7716	7960	7739	6266	6966	7345	1148	1213	825	732	856	866	2872	2092	1327	2062	1710	1129	6827	5387	1095
Gucy2c	-7.14489	0.626287	1.00058e-12	26	56	37	72	2	5	12216	13000	13019	11407	12346	13647	5496	7655	11229	8368	8509	9338				Hpn	4.59258	0.656549	1.38488e-09	2831	2942	2525	673	1517	1732	130	155	44	24	33	47	12	47	20	3	7	4	2224	1944	76
Gstp3	-4.57155	0.50936	1.01221e-12	39	44	21	62	20	17	535	575	424	743	1000	1011	837	643	586	617	443	318				Far1	2.02913	0.295081	1.39956e-09	10189	10690	7417	6135	8292	9130	1894	1795	1766	1389	1569	1458	3503	3657	2072	4760	3816	3544	16994	10931	2319
Cabp1	-4.67692	0.559016	1.07178e-12	1	0	0	6	0	2	60	57	60	49	51	65	89	113	101	5	9	15				Nags	-6.87509	0.770024	1.39956e-09	1	0	0	0	0	4	995	1044	995	1215	1422	1531	42	116	422	6	17	10	2	0	1120
Tanc2	3.53003	0.423162	1.10976e-12	2508	2234	2886	1790	1409	1625	281	346	413	179	161	191	295	293	326	154	121	232				Trim13	2.03174	0.295658	1.42612e-09	504	515	361	472	629	513	58	84	69	44	63	61	142	146	92	97	68	58	480	456	117
Lrg1	9.92768	0.652072	1.13556e-12	4303	4831	4008	1072	1354	2095	1	3	1	2	0	1	0	2	0	15	6	9				Tmem63c	5.81436	0.630138	1.43401e-09	164	123	98	234	180	262	2	0	3	7	2	3	5	3	4	6	5	8	778	449	4
2610528A11Rik	-7.22984	0.641279	1.16731e-12	2	7	14	15	12	0	2692	2846	1226	4272	4609	3926	4215	2103	9498	21115	30146	25850				F2r	4.93186	0.611022	1.47578e-09	3490	2383	3984	2910	7150	8214	2	5	2	7	22	18	302	143	61	45	29	19	1628	1809	11
Arhgef26	-2.21709	0.27765	1.276e-12	534	390	721	534	556	391	2685	2934	3203	2507	2510	2803	1995	2422	2202	2054	1918	1978				F5	5.00199	0.68336	1.47712e-09	2491	3018	3455	3008	4452	4494	92	100	65	33	40	17	8	6	11	2	11	7	135	1287	27
Kctd17	4.10505	0.487465	1.3769e-12	199	273	312	203	197	334	41	40	51	13	18	13	8	17	26	450	363	387				Gm44985	3.54392	0.534168	1.51774e-09	1363	1684	962	769	668	698	473	432	458	100	114	172	113	249	367	237	215	105	1924	2321	394
Aldh4a1	2.20617	0.273531	1.37967e-12	774	713	657	621	867	806	89	136	84	96	91	89	309	306	151	485	544	374				Ccnd2	1.7636	0.260073	1.53941e-09	26152	26517	21401	26433	35143	31649	15210	17180	18777	12457	16020	15080	27797	23917	25142	35690	27971	20815	63551	49221	17789
Creb3l1	3.16293	0.39725	1.37967e-12	4796	5840	5993	4745	4388	4926	2139	1949	1326	712	964	1072	1187	1713	3366	1326	1179	533				Hgfac	2.96947	0.431001	1.55774e-09	11010	11918	13570	12445	10649	11595	1449	1933	1146	2299	2347	2021	2893	1741	3042	15395	13309	10349	9881	9631	1674
Cep85l	6.4944	0.633067	1.40507e-12	142	161	93	128	110	88	1	2	3	3	0	0	2	2	4	2	1	1				Bdh1	-1.94223	0.289369	1.65193e-09	1824	2331	2305	2861	2893	2746	8159	7790	6240	8296	8333	10290	3692	5009	3545	7158	7122	5568	2679	3870	10527
Zfp667	2.43992	0.310562	1.40507e-12	222	190	165	165	190	182	73	79	51	53	57	36	57	45	89	168	197	161				Gm44250	1.92979	0.293272	1.65354e-09	1210	1195	936	706	635	738	793	903	880	436	496	614	734	587	1363	1021	1129	1325	1044	1279	760
Defa26	-7.64211	0.822377	1.44993e-12	0	0	0	0	0	0	298	505	493	642	417	550	36	124	567	0	0	0				Abcc6	-3.05814	0.427705	1.67938e-09	7	15	7	7	16	6	1200	1231	1299	748	773	942	94	189	403	111	136	76	13	37	963
Arid5a	2.78908	0.333457	1.45386e-12	695	650	821	734	1281	887	29	60	50	48	60	47	622	357	196	555	531	588				Arid5a	2.68144	0.377457	1.70248e-09	695	650	821	734	1281	887	29	60	50	48	60	47	622	357	196	555	531	588	870	554	48
Ifit1bl2	-8.75097	0.789153	1.59456e-12	0	0	0	1	0	1	176	203	325	1733	1365	1155	157	189	254	25	30	27				Irs1	3.89621	0.547158	1.76705e-09	940	976	732	704	1302	1371	13	26	58	23	16	28	269	139	149	175	182	103	1260	885	66
Smpd1	2.14957	0.274971	1.60681e-12	1425	1274	1247	809	1116	1110	427	487	399	273	298	301	379	355	419	616	480	675				Tmem65	-1.45493	0.218198	1.77741e-09	1233	1207	1213	1436	1426	1228	2657	3082	3015	3579	3306	3686	2009	2075	1903	2293	1885	2088	1014	1181	2990
A730020E08Rik	-3.51261	0.430932	1.69645e-12	15	10	12	15	11	7	59	122	135	79	105	136	127	177	83	92	88	75				Dna2	-2.68626	0.400005	1.8249e-09	219	291	459	492	627	508	1645	1566	1648	1157	1236	1456	1268	2006	842	976	841	783	277	468	1721
Arl6	2.63087	0.325537	1.7035e-12	581	595	351	335	420	423	56	63	77	71	80	64	116	106	92	209	188	171				Rapgef3	2.35636	0.354466	1.83561e-09	578	472	402	252	268	295	143	175	180	105	108	162	222	173	402	100	90	56	418	678	182
Sstr2	4.28508	0.512305	1.71197e-12	135	152	218	119	107	86	45	46	47	25	19	10	6	5	44	10	24	9				Npdc1	1.41291	0.212087	1.90964e-09	4382	4192	3864	3403	4021	3776	1283	1297	1096	1410	1497	1383	1947	1729	1948	2322	2166	2059	3329	3506	1392
Adam28	8.22658	0.666536	1.85897e-12	5544	5712	4846	2497	3401	4534	0	0	0	4	13	13	18	21	13	25	24	54				Gm13384	-2.64696	0.399234	1.91025e-09	42	62	60	97	93	94	102	97	78	105	99	119	142	239	77	148	111	74	45	46	149
Adgrg2	7.21593	0.594735	1.88977e-12	2266	2750	1207	814	1228	1395	12	7	14	8	7	6	3	3	2	2	0	14				Arhgap24	4.34709	0.611028	1.99347e-09	385	393	197	180	154	144	36	53	69	10	25	20	7	20	36	2	2	1	1032	824	42
Pitpnc1	2.96099	0.363786	1.99718e-12	1484	1412	1522	917	1411	1249	169	251	242	97	108	167	575	489	410	615	498	611				Lrrc19	-6.694	0.788978	2.19474e-09	0	0	0	0	0	0	658	719	794	1662	1541	1557	57	97	456	3218	2800	1674	0	3	777
Gm45889	-6.26431	0.699143	2.0144e-12	1	0	1	0	0	0	111	119	104	125	116	136	211	479	555	292	186	102				Adamdec1	7.5457	0.904911	2.23763e-09	988	997	680	271	467	715	0	1	0	0	0	0	0	8	0	1	3	4	267	669	0
Degs1	1.78508	0.229276	2.28036e-12	5727	5247	6368	5213	5972	5466	1426	1510	1667	1322	1449	1566	1483	1280	1129	1947	2273	2722				Abhd11os	-4.61225	0.64115	2.23782e-09	1	5	0	8	8	3	873	1111	838	2218	2162	2063	991	702	1672	1717	1941	1349	32	14	1139
Hnf4g	-4.32687	0.477852	2.28036e-12	169	242	124	207	96	98	3891	3975	4304	6581	6957	7103	871	1040	1869	504	308	332				Ttc8	4.21918	0.584439	2.2656e-09	491	501	294	273	404	443	39	33	46	15	9	12	30	11	19	27	64	35	296	511	21
Baiap2l2	-2.9646	0.363391	2.35677e-12	614	618	879	590	946	457	6805	6548	6615	4242	5283	6296	3780	5153	4383	3611	1827	1655				Slc4a5	-4.58923	0.599516	2.31588e-09	20	19	3	6	1	11	1886	1883	1668	1515	1352	1682	13	14	65	10	8	8	9	6	676
Zfp607b	2.37789	0.314243	2.4883e-12	156	141	143	88	71	106	110	92	91	59	69	67	23	33	96	107	90	93				Lbp	5.26043	0.775632	2.33213e-09	887	895	1924	333	493	955	51	45	46	2	3	5	44	50	70	4	7	3	2209	8376	92
Bend7	3.80086	0.470402	2.82026e-12	430	364	388	174	323	462	239	259	335	117	121	125	3	5	63	1	0	0				Ccpg1os	1.97258	0.302192	2.52864e-09	406	377	321	297	243	307	206	244	199	106	112	125	114	93	202	234	208	199	264	400	148
Sh2d3c	2.35871	0.302198	2.83274e-12	387	334	257	207	314	302	89	90	72	81	86	60	109	87	136	215	182	193				Wwc2	1.60637	0.23743	2.6224e-09	3235	3393	3443	3099	3581	3649	710	909	744	587	637	611	1391	1534	649	1218	868	824	3184	3519	521
Gm12320	-4.65887	0.536098	2.85514e-12	2	4	1	3	5	6	187	170	152	148	138	158	51	108	116	108	62	29				Tpsg1	-5.41078	0.652594	2.75188e-09	0	2	0	0	0	0	631	510	664	230	230	250	68	187	809	101	123	98	1	2	1140
Gabrp	9.78586	0.796178	2.895e-12	1905	1960	3761	961	1677	4286	0	0	0	0	0	0	13	12	1	824	447	267				Car5b	3.93236	0.544569	2.75934e-09	540	511	467	316	395	478	4	6	3	8	10	5	76	30	24	145	73	67	225	199	10
Hnf4a	-1.68151	0.215835	2.93763e-12	7708	8110	6980	7094	7861	7735	36992	36073	33179	36207	39855	41499	18360	21851	33478	38900	33212	29838				Erich3	7.26984	0.893528	2.76522e-09	629	463	299	402	200	307	0	4	1	0	1	3	6	3	3	15	8	25	71	603	0
Oaf	2.06105	0.26638	3.30634e-12	1579	1368	1762	1152	1640	1976	531	560	614	454	502	511	257	304	394	123	83	108				Ube2e2	1.91972	0.288835	2.77767e-09	656	624	737	675	759	828	209	248	220	182	163	187	144	124	159	320	475	360	629	736	255
Tirap	1.17809	0.154955	3.31759e-12	2025	2063	1855	1759	1903	1846	682	780	861	636	632	706	1355	1212	915	1626	1335	1505				Ptp4a3	2.37772	0.344309	2.8008e-09	4703	4023	3731	3527	5786	5263	321	414	342	388	545	512	2303	1527	903	3184	2356	1487	4168	3773	512
Defa36	-7.62174	0.816375	3.41566e-12	0	0	0	0	0	0	429	710	1115	967	659	826	66	161	1579	0	2	0				Cyp4f14	-5.63405	0.728754	2.8867e-09	29	37	34	23	26	35	6560	6993	5874	37025	32352	31393	769	1376	4763	2515	2928	3643	42	37	6592
Acacb	4.44581	0.520387	3.58459e-12	1391	1595	2771	1703	1045	1140	179	212	140	90	66	68	56	34	89	717	1001	1703				Rab5b	1.29282	0.198117	3.11323e-09	2445	2455	1888	1507	1744	1631	1157	1130	1036	835	899	906	921	778	1095	1503	1388	1308	1670	1715	995
Ugt1a1	-6.2461	0.59639	3.58459e-12	3	13	5	3	3	1	1722	1478	1278	2175	2274	2144	96	174	863	164	356	517				Dab1	-7.65375	0.846659	3.19923e-09	10	2	5	0	1	2	783	790	681	403	399	460	11	13	68	0	0	0	0	0	650
Agr2	3.86292	0.476358	3.6683e-12	27747	25954	48995	68730	49127	43827	9109	8980	8572	6268	7678	7337	4947	7138	28716	3072	3409	1998				Zfp385b	3.99177	0.606678	3.2444e-09	61	98	38	16	19	23	41	34	28	5	6	11	1	0	6	7	9	9	55	80	12
Gadd45g	2.06365	0.261951	3.78299e-12	542	629	671	595	604	711	104	127	118	113	111	107	140	114	85	128	155	155				Cyp2c68	-6.3042	0.763813	3.24753e-09	2	0	1	0	0	0	1238	1278	1279	1795	1757	2000	19	73	319	332	197	105	3	1	892
Tff2	8.01545	0.735534	3.87937e-12	46036	56603	19183	33574	26116	17360	133	145	167	8	3	7	5	16	22	0	5	1				Oat-rs1	-2.20769	0.317294	3.36068e-09	134	128	167	117	113	119	1724	1947	2112	1499	1377	1649	163	300	1135	94	76	73	61	114	1437
Far1	2.02685	0.259425	3.925e-12	10189	10690	7417	6135	8292	9130	1894	1795	1766	1389	1569	1458	3503	3657	2072	4760	3816	3544				Ly6k	2.33295	1.00109	3.39597e-09	3	19	10	19	433	396	0	0	0	0	0	0	1	0	9	0	0	0	481	0	0
Rgs17	5.78161	0.558797	4.26911e-12	741	834	344	594	958	754	16	19	27	6	4	11	6	3	6	2	4	3				Bcas3	1.18001	0.180672	3.43949e-09	1093	1115	840	715	1029	945	703	644	640	506	557	566	647	682	765	958	814	786	939	1075	477
Tex15	6.75427	0.638257	4.36914e-12	258	224	327	199	302	389	0	0	0	2	3	4	6	1	6	5	7	3				Ankdd1b	7.47173	0.904937	3.457e-09	110	247	68	201	60	54	5	5	4	1	0	2	2	4	2	133	40	19	628	275	0
Hacd4	4.8294	0.465342	4.47493e-12	1432	1309	1735	1651	1787	2348	5	4	5	9	22	18	80	32	9	60	40	51				Guca2b	-6.37638	0.808371	3.51465e-09	5	6	3	5	6	3	973	1005	1020	7742	6030	5996	227	540	1531	380	397	519	2	13	2780
Kctd1	3.14921	0.391242	4.6303e-12	245	249	314	148	261	263	35	39	57	23	23	36	40	41	46	119	112	85				Vill	3.42921	0.481099	3.7409e-09	17755	16955	14758	9840	12289	13097	556	717	457	381	474	321	1779	998	397	2702	1838	1022	11292	14568	604
2510009E07Rik	3.93042	0.5338	4.73813e-12	276	243	90	70	69	113	121	129	135	27	24	30	10	24	165	7	13	19				Zdhhc2	-2.0369	0.304137	4.1744e-09	549	480	348	565	347	384	1634	1679	1592	953	1134	1274	1063	1276	1153	1241	920	886	294	531	2069
Gpc1	4.06666	0.441566	4.84131e-12	1872	1578	1985	1960	3366	2958	26	40	24	48	65	49	100	76	33	650	436	209				Rbp2	-6.35347	0.83449	4.45217e-09	2	11	10	0	16	12	5156	7467	5764	30815	29566	30163	335	423	823	155	177	139	39	45	7470
Plet1	4.65277	0.533393	5.27478e-12	1344	1339	677	285	340	479	37	57	44	41	53	43	76	59	119	43	61	80				Fbxo17	3.07403	0.457336	4.55191e-09	302	310	170	240	271	220	32	62	17	20	22	34	28	36	42	18	15	19	207	197	44
Stox2	3.11393	0.379999	5.27478e-12	908	795	783	854	1174	1109	106	106	149	59	95	56	210	237	174	33	20	33				AI481877	3.92185	0.552549	4.72777e-09	333	296	465	272	274	277	36	43	35	24	23	28	155	47	46	423	318	278	138	239	3
Card11	-7.10437	0.764405	5.46654e-12	0	1	0	0	0	0	1670	1453	1245	536	586	736	7	48	329	14	14	3				Thnsl2	-3.22181	0.458155	4.89696e-09	96	85	39	48	49	65	666	729	512	855	786	1006	129	169	359	108	124	149	33	51	706
Gsto1	3.35712	0.406844	5.49047e-12	204346	209329	101004	81306	94016	138815	10807	11959	11152	14137	14949	14613	9959	10282	8858	18818	15045	13168				Laptm4a	1.01907	0.157893	4.92396e-09	13815	12788	10460	10867	14322	14234	6980	7195	7271	5767	5825	6750	6357	6004	7938	9187	8342	8318	10671	10992	6775
Cdk19	1.64124	0.216874	5.65087e-12	3755	4007	4351	3498	3010	3067	1452	1560	1511	1061	1247	1148	2084	1849	1929	3155	2593	2596				Krt5	9.37525	0.922889	5.01703e-09	4	8	4	31	50	25	14	8	2	6	4	5	64	42	6	13	40	4	24291	2805	1
Ern2	3.55003	0.453503	5.74658e-12	5843	7245	4424	3862	3040	3154	1572	1421	1556	475	594	634	574	756	1548	1174	1031	484				Kctd1	2.46236	0.369378	5.02181e-09	245	249	314	148	261	263	35	39	57	23	23	36	40	41	46	119	112	85	333	374	61
Rhobtb2	1.41166	0.187459	6.20208e-12	2336	2224	1950	1539	1915	1918	829	904	889	695	653	715	818	869	699	1180	971	926				S100a1	1.63351	0.248872	5.11869e-09	1436	1507	1578	1837	2118	1644	462	489	516	561	489	533	462	390	463	2633	2217	2024	1383	1292	386
Shisa5	1.80304	0.239302	6.38916e-12	8878	8914	7557	5371	6551	7132	3814	3762	3130	2493	2628	2830	3787	2880	4321	5793	5409	5849				Mycn	3.39514	0.48298	5.18238e-09	2211	2180	1481	693	1845	1953	100	120	100	74	126	156	77	68	46	138	99	79	998	2705	138
Gm45716	-6.35307	0.771098	6.85214e-12	0	0	0	1	0	0	152	163	155	70	71	94	50	84	103	10	16	29				Lin54	-1.49346	0.232179	5.4032e-09	456	583	648	816	687	572	1309	1299	1312	1416	1460	1602	1909	2053	1200	1849	1667	1723	730	904	1660
Cps1	-10.9091	0.76714	7.02291e-12	0	0	1	7	0	0	60763	61589	64213	59980	56787	79420	911	8169	29138	6	80	25				Pon3	1.66553	0.25988	5.4436e-09	1206	1084	867	730	771	775	869	973	914	514	569	652	926	709	1466	1067	1159	1417	1119	1268	761
Crybg2	-2.59195	0.334403	7.52114e-12	542	576	498	846	569	470	1944	2227	2346	2837	3119	3234	2492	2338	1784	1644	1623	1830				Wnt3	-7.04064	0.835506	5.49805e-09	0	0	0	0	1	0	165	227	275	283	286	321	177	324	521	3	2	2	0	0	218
Hsd3b3	-5.74696	0.765404	7.70066e-12	0	0	0	0	0	0	90	81	90	38	55	45	92	87	168	922	1148	1752				Atoh1	-6.62033	0.753925	5.70373e-09	0	0	0	0	0	0	625	620	767	343	346	386	382	708	1390	168	165	110	0	0	354
Myo7b	-6.83255	0.645863	8.06147e-12	23	28	42	305	60	24	15783	16067	15533	15439	17084	17502	15790	13542	18088	14950	11760	12607				Hlcs	1.11778	0.173537	5.7279e-09	2023	1987	1703	1595	1528	1757	1082	1259	1129	823	934	965	1394	1156	1267	1788	1633	1657	1906	2413	1371
Dhx40	1.08938	0.147157	8.19893e-12	2641	2579	2074	1877	1998	2019	1477	1410	1482	1131	1303	1325	1464	1392	1668	1612	1355	1361				Arl14	1.96814	0.300048	5.80553e-09	3950	3688	3372	2036	2159	2447	774	1015	889	796	772	753	814	749	652	1398	1085	1177	2218	2709	605
Cth	-3.21637	0.399798	8.56486e-12	401	418	401	730	390	299	2911	3325	3004	4070	4250	5008	2562	2769	2398	1598	1793	1871				Gm44220	6.65122	0.894405	5.82344e-09	209	203	222	106	84	91	0	0	0	0	0	0	0	0	1	0	0	0	29	147	0
Grasp	2.22351	0.289324	8.59653e-12	2423	2396	1758	1337	1735	1658	456	551	465	283	380	406	886	850	714	1189	800	793				Efna5	7.01988	0.743938	5.85846e-09	659	674	558	859	1088	837	0	1	1	0	0	0	38	13	2	122	111	56	749	648	1
Npdc1	1.61795	0.215034	9.01906e-12	4382	4192	3864	3403	4021	3776	1283	1297	1096	1410	1497	1383	1947	1729	1948	2322	2166	2059				Gucy2c	-5.84228	0.774918	5.99577e-09	26	56	37	72	2	5	12216	13000	13019	11407	12346	13647	5496	7655	11229	8368	8509	9338	83	6	12729
Cacna1b	3.95306	0.49025	9.5421e-12	239	330	159	111	132	167	37	43	54	12	16	18	15	25	38	9	8	8				Nos2	-5.51133	0.726293	6.00666e-09	0	0	5	0	0	2	138	197	298	348	383	245	649	450	1653	303	229	162	0	7	391
Arhgap24	4.35807	0.528133	9.64741e-12	385	393	197	180	154	144	36	53	69	10	25	20	7	20	36	2	2	1				Cacna1b	3.26734	0.511726	6.18097e-09	239	330	159	111	132	167	37	43	54	12	16	18	15	25	38	9	8	8	149	370	54
Pllp	2.53776	0.334625	9.87361e-12	3427	4195	1890	2065	2052	1781	1113	1126	915	601	741	703	343	350	573	947	849	775				Mme	-7.0356	0.812799	6.18236e-09	3	6	9	14	19	12	2350	3106	3553	6459	4407	5488	3	5	92	5	4	1	3	5	2340
Slc35f2	-4.62727	0.528553	1.02385e-11	30	17	7	39	83	32	917	1091	1068	751	766	906	269	324	277	399	305	259				Mmp15	2.16563	0.330059	6.60675e-09	12453	13278	12147	12867	15899	17420	2189	2755	2919	3456	3741	3326	6288	5420	6743	13029	13694	12747	9811	11390	2443
Dnal4	1.08732	0.147708	1.06915e-11	877	854	777	632	731	794	518	583	531	389	398	506	455	504	540	619	529	500				Depdc7	-2.23199	0.33868	6.67927e-09	294	286	211	420	403	376	1002	1201	895	989	953	966	769	699	829	199	165	163	253	190	1122
Dhrs4	-2.32164	0.299958	1.15024e-11	750	907	835	782	860	752	4345	4894	4269	4957	5219	6260	792	1569	1300	1191	1286	1151				Lmnb2	-1.16529	0.181798	6.80628e-09	1341	1715	1480	1597	1738	1592	3119	3245	3121	3057	2929	3654	2863	3989	2471	4772	4108	3863	2018	1792	3537
Rab34	2.80695	0.34885	1.15024e-11	1141	982	1015	814	874	880	108	140	67	63	112	86	208	148	101	66	69	46				Cpd	1.34155	0.208651	7.3129e-09	12457	14909	13555	15481	15325	14851	5765	6177	6214	5952	5966	6017	5646	6972	8101	10967	8434	8040	17186	16096	6650
Cybrd1	3.30298	0.426322	1.16121e-11	36074	42714	34521	22465	17941	16040	12455	17047	8181	9894	5798	7123	641	539	2160	11	24	14				Col11a2	3.51447	0.531157	7.44888e-09	1794	1722	2853	1942	2524	2299	165	192	261	51	56	78	66	64	73	60	76	48	1508	1555	146
Adk	-1.08769	0.147389	1.1715e-11	1273	1073	984	1174	1304	1064	2336	2417	2200	2045	2196	2203	3046	2847	2562	4986	4357	3522				Lipg	-3.48853	0.51978	7.48794e-09	81	85	186	241	264	189	1417	1227	827	529	621	771	370	555	287	551	503	469	95	84	1006
Tac1	-7.05547	0.736275	1.17478e-11	0	2	0	0	0	0	860	1078	1637	421	362	499	20	54	236	51	41	25				Ifit1bl2	-6.15247	0.832941	7.73842e-09	0	0	0	1	0	1	176	203	325	1733	1365	1155	157	189	254	25	30	27	1	5	503
Abcg2	-4.80576	0.52015	1.20763e-11	18	43	34	69	30	66	2015	2177	2113	3043	3312	3041	673	848	2228	1019	1029	743				Mroh2a	-3.45501	0.542572	7.93892e-09	7	8	2	5	3	3	32	37	38	55	59	84	60	80	22	27	20	18	15	8	37
Shf	1.69949	0.226664	1.21118e-11	764	720	560	665	897	722	231	252	252	183	188	216	590	567	553	723	441	546				Cps1	-7.33937	0.875516	8.10402e-09	0	0	1	7	0	0	60763	61589	64213	59980	56787	79420	911	8169	29138	6	80	25	18	51	74738
Maged2	3.03975	0.384002	1.32447e-11	2222	1742	1555	1373	1968	1946	314	351	350	165	137	177	400	330	318	215	243	180				Trerf1	4.39194	0.693824	8.4348e-09	92	128	40	4	13	23	17	19	18	7	6	3	0	1	2	1	1	0	120	405	37
Filip1l	1.65032	0.218797	1.38677e-11	3210	2887	3170	2784	2949	2782	748	787	901	563	655	590	1448	1395	817	1355	1164	1218				Fam241a	1.5828	0.24536	8.46735e-09	802	990	597	633	624	651	267	394	407	306	299	336	410	416	354	590	513	567	1043	1120	409
Dzip1l	5.21205	0.529062	1.38877e-11	1919	1778	1810	1527	1652	1831	18	12	7	20	46	33	25	43	18	12	10	2				Plcb1	2.89446	0.469331	8.53801e-09	326	286	706	309	258	326	136	112	122	74	51	66	33	70	241	10	6	7	215	487	154
Erich3	7.14307	0.65827	1.46651e-11	629	463	299	402	200	307	0	4	1	0	1	3	6	3	3	15	8	25				Chgb	-6.15597	0.714127	8.56816e-09	69	79	2	25	9	6	15659	18812	26698	6454	5614	7647	740	1974	8137	1084	1372	685	13	31	22462
Med13l	1.38426	0.188789	1.54027e-11	4103	4036	3579	3311	3575	3206	2196	2445	2752	1582	1673	1863	2124	1964	2658	2478	2068	2376				Fndc1	5.86791	0.742585	9.38556e-09	1	1	5	0	2	3	10	8	2	1	0	1	1	2	4	75	101	233	424	270	6
Slitrk6	-5.47447	0.639148	1.60146e-11	0	0	1	1	3	0	165	220	195	95	108	86	92	101	230	0	1	2				Foxa1	1.40269	0.217493	9.52773e-09	4597	5484	4648	3951	5263	5121	1677	1694	1820	1134	1380	1409	4990	4816	2898	4197	4019	4155	7016	7158	1937
Rpia	-1.20286	0.164192	1.68689e-11	1265	1374	1237	1560	1449	1336	2529	2811	2545	2475	2722	3084	2226	2507	1956	2155	1761	1508				Numbl	2.82801	0.423565	9.84431e-09	564	560	398	255	458	471	26	34	24	13	18	21	33	36	22	23	12	8	303	315	55
9530026P05Rik	7.9545	0.759296	1.80306e-11	163	130	153	96	67	60	0	0	1	0	0	1	0	0	1	0	0	0				Ttll7	2.67284	0.390301	1.04101e-08	1871	1805	1976	2246	2796	2179	109	117	162	156	205	137	200	251	139	400	208	133	1989	1414	104
Pamr1	7.15396	0.726348	1.86765e-11	1039	691	408	9	52	92	14	8	3	0	0	1	1	1	28	1	1	0				Ikzf2	5.03363	0.728372	1.1931e-08	426	337	324	117	131	250	14	7	19	0	6	2	100	51	39	146	141	176	316	478	7
Fzd1	4.68899	0.542174	2.01322e-11	869	693	988	501	925	1015	31	47	77	14	13	16	87	43	74	1776	1551	1466				Dzip1l	3.59294	0.491812	1.19989e-08	1919	1778	1810	1527	1652	1831	18	12	7	20	46	33	25	43	18	12	10	2	1389	1587	58
Rgn	-2.75379	0.346908	2.01928e-11	69	74	112	71	58	62	863	875	666	741	865	1051	99	107	179	124	139	97				Abhd3	-3.80509	0.552975	1.22073e-08	123	157	77	230	166	157	1739	2182	2145	2870	2572	2731	622	573	1069	15	31	56	115	119	1662
Acot4	-6.05936	0.621208	2.02861e-11	11	12	5	9	5	2	278	329	296	1001	1144	1110	93	115	110	244	244	281				Gm7357	-1.79718	0.278198	1.24028e-08	131	150	104	75	124	99	327	312	333	270	365	388	166	164	195	125	100	112	111	161	508
Stk40	-1.06252	0.14589	2.0726e-11	1099	1109	1070	1093	1201	1204	1927	1935	1869	1945	2123	2299	1925	1877	1600	2695	2376	2429				Cadm4	2.96018	0.455731	1.26847e-08	922	1060	709	372	734	849	26	35	35	41	56	63	108	101	124	138	149	163	507	735	117
Lin54	-1.80438	0.245555	2.09945e-11	456	583	648	816	687	572	1309	1299	1312	1416	1460	1602	1909	2053	1200	1849	1667	1723				Tnfsf13b	-4.20472	0.615583	1.33724e-08	10	11	7	2	7	5	101	149	132	167	168	171	156	194	178	157	399	434	2	8	120
Gpr161	5.17992	0.577751	2.15173e-11	263	159	293	127	298	234	14	5	15	6	2	9	6	22	22	1	0	1				R3hdm4	1.581	0.24961	1.38343e-08	7874	8671	5848	5743	5437	5191	3589	3631	2825	2468	3024	2881	4871	3986	4274	7735	7036	6866	9848	9350	4477
Tstd1	-3.5446	0.41619	2.21197e-11	41	66	46	34	68	25	1454	1802	1756	1007	1383	1560	299	737	1365	3314	2448	1615				Stra6l	-5.99888	0.744779	1.39169e-08	81	53	18	3	8	21	2722	2792	3385	921	983	1310	1215	1520	1980	936	1615	2031	1	14	2430
Cenpv	-1.74063	0.233093	2.31651e-11	528	548	477	730	692	596	2750	2706	2837	2011	2084	2611	1203	1448	1612	1429	1182	1127				Spdef	2.49016	0.409675	1.41067e-08	2348	2674	3580	3805	4290	3503	780	754	921	366	461	533	232	457	1558	168	192	133	1945	2689	1443
Mroh2a	-4.2565	0.537777	2.33712e-11	7	8	2	5	3	3	32	37	38	55	59	84	60	80	22	27	20	18				Cyp39a1	2.32924	0.377162	1.41414e-08	1568	1445	1112	970	1098	1006	1055	995	1068	394	407	451	614	593	957	694	761	675	1139	1355	675
Ube2e2	2.12275	0.283429	2.33712e-11	656	624	737	675	759	828	209	248	220	182	163	187	144	124	159	320	475	360				Rab27b	2.23591	0.345733	1.44969e-08	4295	5278	2988	3731	3277	3087	1315	1416	1550	754	923	849	1895	1626	1318	1156	760	698	7548	6352	1600
Tyro3	2.73922	0.367327	2.46336e-11	2679	2721	1578	1224	1873	1884	889	951	830	386	362	489	274	378	519	322	300	295				Bckdha	1.57595	0.252406	1.47266e-08	2759	2657	2441	1568	1824	2034	1820	2016	1850	1146	1042	1218	1033	1169	1540	1760	1592	1248	2698	3058	1565
Pygb	1.83608	0.250497	2.49749e-11	9074	10144	7687	5268	5446	6593	3529	3781	3321	2456	2697	3022	2596	3263	3400	5798	5075	4838				Iyd	4.37369	0.644663	1.47588e-08	1632	1911	926	758	427	983	281	358	445	133	69	91	1	3	13	51	41	23	1650	1466	75
1700001O22Rik	3.01233	0.391664	2.56387e-11	442	388	526	417	344	541	105	121	65	76	76	99	106	92	180	52	75	108				Mal	5.08759	0.633777	1.49721e-08	10487	12024	6602	5395	7496	7669	15	35	18	99	111	91	1292	806	176	1832	879	546	21510	11828	55
Ndnf	6.85798	0.611856	2.68554e-11	2946	2374	2351	3325	4897	3497	3	4	0	12	14	5	57	15	14	300	138	46				Lrfn1	2.05661	0.326772	1.50964e-08	240	228	198	172	240	251	37	41	37	24	18	26	25	32	42	16	23	22	111	155	53
Pde4b	-5.51747	0.72229	2.68554e-11	0	0	0	1	0	0	61	71	81	52	37	58	81	111	154	149	180	260				Glul	3.43877	0.560014	1.51931e-08	16779	19050	10439	6674	6619	8956	5158	5409	5874	1120	1300	1488	1391	1547	3019	12225	10003	6101	9421	20236	2955
Gfra3	-6.84118	0.819843	2.70176e-11	0	0	0	0	0	0	201	226	299	74	87	87	31	75	89	10	13	11				9530026P05Rik	6.25818	0.879384	1.54051e-08	163	130	153	96	67	60	0	0	1	0	0	1	0	0	1	0	0	0	25	79	0
Notch3	3.78245	0.446748	2.91912e-11	2098	1778	2346	1531	2003	2364	69	86	34	110	123	88	377	192	202	245	138	172				Cd63-ps	1.10731	0.176487	1.54436e-08	3456	3558	2789	2987	3747	3509	2096	2298	2502	1964	1965	2067	1732	2063	2295	3386	3323	3149	4183	3555	2359
Ccdc134	-2.04366	0.276176	3.03122e-11	449	468	401	360	407	384	1328	1334	1063	1437	1599	1501	623	968	531	593	560	464				Tnk2	1.66862	0.260837	1.54436e-08	5063	5686	3405	3337	3703	3939	2417	2474	2491	1830	1963	2117	2748	2595	1754	3977	2854	2904	6291	6836	2220
Defa-ps1	-8.05099	0.842621	3.06054e-11	0	0	0	0	0	0	160	486	885	818	567	709	49	119	516	0	1	1				Slc36a4	2.07272	0.325782	1.56956e-08	513	510	434	388	425	460	71	81	77	82	70	67	484	352	396	191	204	326	611	582	189
Anxa6	2.39606	0.302663	3.08991e-11	3581	3127	3710	5674	6473	5023	237	293	365	255	281	254	2309	1388	563	926	701	545				Tab1	1.08883	0.173432	1.56956e-08	1913	2113	1907	1632	1823	1840	1824	1871	1520	1109	1260	1387	1370	1340	1411	1436	1164	1009	2103	2546	1321
Pml	1.05925	0.146059	3.10882e-11	3245	3238	3384	3045	3681	3650	1729	1797	1683	1337	1300	1490	2010	1902	1682	2130	1735	1691				Dock8	-4.84773	0.674612	1.5774e-08	22	15	16	24	86	29	769	900	880	1732	1699	1884	216	422	878	255	277	291	14	35	1604
Sgce	8.58135	0.663901	3.10882e-11	763	495	686	164	320	272	4	0	1	0	0	0	0	0	0	0	0	2				Krt80	3.58744	0.496373	1.58757e-08	783	763	745	1202	1750	1634	77	100	115	59	83	53	1236	690	211	291	248	193	2288	1041	33
Tpsg1	-5.97144	0.682901	3.1125e-11	0	2	0	0	0	0	631	510	664	230	230	250	68	187	809	101	123	98				Arhgef10	3.13678	0.488488	1.61381e-08	1465	1656	1063	1020	1074	1063	318	340	350	104	112	122	336	269	298	120	178	187	1339	1729	198
Scel	4.1641	0.469841	3.3428e-11	1065	942	1223	1839	2742	2361	24	19	25	15	54	36	296	226	106	731	419	303				Galnt12	1.0644	0.170728	1.65147e-08	2323	2820	2732	2939	2587	2511	1223	1391	1264	1033	1136	1181	1739	1981	2463	3345	3372	3671	2846	3111	1937
Efna5	7.39668	0.722925	3.35172e-11	659	674	558	859	1088	837	0	1	1	0	0	0	38	13	2	122	111	56				Plag1	3.70376	0.528234	1.68875e-08	46	27	34	23	24	13	22	31	25	26	20	17	17	9	18	9	7	10	119	305	17
Camsap2	2.99372	0.372301	3.49776e-11	1903	2000	1937	1729	2073	1802	61	87	92	142	172	146	684	630	343	1354	842	659				Stoml1	1.75683	0.281276	1.73856e-08	739	713	504	379	457	611	452	482	475	292	292	282	292	257	406	392	333	289	614	812	345
Tmem189	1.77676	0.235595	3.58971e-11	1344	1573	1095	1366	1619	1346	256	239	205	213	212	257	209	238	97	1121	1082	955				Atp6v0e2	-3.48747	0.534126	1.76908e-08	17	22	8	8	31	12	147	122	89	191	161	174	430	413	417	361	495	348	14	10	105
Rab5b	1.52792	0.211607	4.01641e-11	2445	2455	1888	1507	1744	1631	1157	1130	1036	835	899	906	921	778	1095	1503	1388	1308				Mapk12	3.02027	0.45636	1.76908e-08	669	604	349	446	372	453	27	47	43	23	40	32	188	148	85	177	101	143	464	620	53
Golga7b	-6.13843	0.751075	4.04906e-11	0	0	0	0	1	1	48	73	73	31	33	53	55	51	27	6	14	9				Uaca	-1.39849	0.218571	1.77236e-08	1647	1503	1581	1928	1992	1757	6841	6675	6251	4784	5299	5950	5144	6027	9434	5015	4461	4494	2201	2151	10904
Col11a2	4.36387	0.518115	4.16781e-11	1794	1722	2853	1942	2524	2299	165	192	261	51	56	78	66	64	73	60	76	48				0610005C13Rik	-4.30466	0.587424	1.80763e-08	5	9	5	2	2	4	1096	1059	1072	1462	1277	1454	5	19	49	279	329	288	6	10	898
Ets2	-1.15946	0.161507	4.24337e-11	4088	4298	4029	4460	5911	5184	7950	8388	8769	7091	8119	8091	15731	14639	11392	16056	14063	14049				Hrct1	4.66558	0.63357	1.80763e-08	156	159	94	112	85	81	5	5	2	1	1	0	14	3	5	13	16	16	185	145	2
Gnpda2	1.55946	0.218571	4.37299e-11	765	713	600	524	671	661	576	567	566	295	382	398	278	380	597	557	468	403				Ackr3	5.23941	0.707465	1.83882e-08	1235	1072	952	389	761	1039	5	12	6	0	1	0	12	8	9	3	2	3	1365	1202	17
Adgrg6	7.84891	0.680702	4.76009e-11	3338	3151	3708	2231	4936	5194	6	17	8	2	3	1	18	2	11	263	139	11				Abcb1a	-3.48564	0.510594	1.85411e-08	94	64	104	29	82	123	4565	5096	5094	6563	7400	7031	6544	10087	15212	24690	19988	18928	132	400	5588
Erap1	-1.23206	0.169249	4.96699e-11	1219	1291	1310	1180	1278	1214	4962	4992	5937	3707	3845	4306	3104	4047	4787	3697	3735	4049				Arl6	2.12274	0.329663	1.94215e-08	581	595	351	335	420	423	56	63	77	71	80	64	116	106	92	209	188	171	360	501	68
Crybg3	1.58696	0.216339	5.13258e-11	1574	1704	1547	1958	2137	1814	365	476	576	360	445	411	1107	1046	738	1284	1121	1153				Krt6a	8.03078	0.840778	1.95184e-08	0	0	2	2	4	4	0	1	0	0	0	2	692	1094	66	12	8	5	4786	864	0
Mapk12	3.17286	0.398804	5.56477e-11	669	604	349	446	372	453	27	47	43	23	40	32	188	148	85	177	101	143				Lemd1	6.85182	0.810641	1.98868e-08	1437	1331	1398	958	1040	1338	0	0	0	0	0	0	135	71	14	68	40	40	209	962	0
Tnfaip8	1.75523	0.237619	5.6144e-11	1363	1329	1504	1561	1994	1966	357	414	352	283	284	298	829	835	520	1086	908	809				Lamb1	3.39899	0.517219	2.01758e-08	3381	2782	3625	1308	2617	2880	243	430	280	298	339	291	371	266	486	48	42	28	1930	6230	311
Wdr72	8.70799	0.675827	5.64204e-11	1509	1414	1652	1151	1814	2021	0	0	0	4	1	0	7	2	1	14	12	32				Acpp	-3.818	0.535867	2.05797e-08	30	23	4	5	7	3	2306	2295	2190	978	990	1184	233	482	1151	18	17	11	22	14	1185
Nos2	-6.13869	0.66933	5.87718e-11	0	0	5	0	0	2	138	197	298	348	383	245	649	450	1653	303	229	162				Pitpnm3	3.53941	0.558881	2.07874e-08	2761	2725	2156	1582	1661	2096	427	526	405	109	147	166	978	533	568	1148	1015	971	2932	3297	472
Ptpn9	1.12593	0.157622	5.92299e-11	2083	2143	1820	1793	2364	2057	1107	1252	1179	827	873	942	1615	1549	1539	2352	2063	2014				Ugt2b36	-6.75549	0.814627	2.07876e-08	0	1	0	0	0	2	248	238	250	362	451	450	15	27	78	7	5	23	1	1	523
Sis	-12.423	0.833753	6.11694e-11	0	0	0	0	0	0	28212	38906	49044	295529	260227	260142	428	2280	44945	6	59	25				Eml3	1.22072	0.194959	2.08797e-08	3056	3029	2745	2128	2901	2850	1513	1485	1453	979	1180	1125	1782	1834	1378	1889	1436	1449	2987	3599	1472
BC030870	-5.27298	0.566786	6.33816e-11	21	11	55	5	12	28	1204	1187	1298	1831	1707	1852	485	530	814	1347	1254	839				Ada	-4.00064	0.615103	2.18352e-08	81	167	112	248	401	208	623	810	515	1801	1747	1152	662	536	482	813	536	405	150	66	1321
Fbxo17	3.47805	0.441546	6.33818e-11	302	310	170	240	271	220	32	62	17	20	22	34	28	36	42	18	15	19				Appl2	1.7605	0.282151	2.23588e-08	12145	12159	15674	12184	9314	11630	3811	4056	3770	2857	2761	2848	3605	2768	3680	9504	7893	6971	7077	12010	3350
Zfp93	1.79596	0.253185	6.36321e-11	298	278	270	235	293	299	250	237	230	126	137	158	110	110	253	245	215	217				Pla2g16	1.22063	0.197833	2.24164e-08	2450	2525	2434	2414	2866	2617	899	1156	1091	703	681	796	801	999	1397	635	558	448	1515	1723	1015
Tle3	1.40426	0.198142	6.36685e-11	4221	4888	4231	3051	4093	4503	3240	3533	3413	2037	2454	2432	3186	3418	5357	4812	4067	4158				Galntl6	2.91549	0.451346	2.26624e-08	232	345	191	482	311	187	57	60	44	34	34	44	67	73	104	97	70	88	883	658	103
Adamdec1	9.09217	0.801768	6.61241e-11	988	997	680	271	467	715	0	1	0	0	0	0	0	8	0	1	3	4				Tent5b	3.29763	0.468246	2.26736e-08	999	943	894	702	908	778	49	66	41	36	54	33	244	141	45	449	251	228	1099	611	13
Dennd5b	-2.07502	0.276857	6.66412e-11	166	129	136	129	149	145	1089	980	1033	1004	1060	1111	454	671	1023	396	235	349				Slc35f2	-3.43349	0.52722	2.29514e-08	30	17	7	39	83	32	917	1091	1068	751	766	906	269	324	277	399	305	259	70	86	1046
Fabp1	-11.8962	0.850148	6.70238e-11	0	0	0	2	0	0	14326	15846	10505	95187	81495	94768	6	61	97	0	9	2				Tceal8	4.85854	0.725308	2.54652e-08	722	671	297	119	119	64	11	26	12	13	7	6	25	25	46	1	5	1	499	823	17
Lclat1	-1.88881	0.255262	6.72574e-11	679	694	641	859	724	649	3523	3568	3329	3858	3728	4191	1736	1965	2869	3000	2803	2662				Pax9	8.02687	0.813961	2.58299e-08	897	840	1636	516	598	1478	0	0	0	0	0	1	2	4	0	2	1	7	989	1961	0
Chrm1	3.75887	0.507601	6.86327e-11	113	128	84	71	74	72	51	63	61	11	13	19	3	15	49	3	3	6				Fam174a	1.45748	0.236699	2.63091e-08	557	550	458	441	549	527	244	326	290	248	252	230	260	210	389	487	444	522	492	444	319
Gm20219	2.09287	0.284759	7.33963e-11	610	662	429	442	540	559	155	147	156	83	113	123	429	394	360	286	205	150				Chga	-4.95005	0.632841	2.66505e-08	19	17	6	3	1	0	3244	3794	5436	1303	978	1399	111	282	1705	138	185	93	5	8	2563
Tcf4	1.90796	0.26264	7.45525e-11	2165	2553	2246	1784	2180	2143	816	775	848	427	530	581	780	1044	771	1362	1138	1037				Wdr72	5.83069	0.637503	2.66979e-08	1509	1414	1652	1151	1814	2021	0	0	0	4	1	0	7	2	1	14	12	32	691	505	4
Defa5	-7.36715	0.82365	7.85987e-11	0	0	0	0	0	0	301	562	874	757	509	662	50	128	1219	0	1	0				Wipf3	-5.01783	0.706838	2.67525e-08	27	21	7	7	25	16	167	191	171	319	302	341	241	268	377	8	34	33	5	2	512
Asah1	1.09404	0.15358	7.91317e-11	12450	12764	13436	13598	13232	13991	5573	5958	5657	5793	6045	5506	7970	7240	7051	11033	9495	8663				Aldob	-6.81819	0.86469	2.67554e-08	3	15	14	9	2	1	66551	71402	78740	350473	317155	340136	1508	3620	26682	654	387	231	31	74	66145
Fam174a	1.61912	0.227365	7.91317e-11	557	550	458	441	549	527	244	326	290	248	252	230	260	210	389	487	444	522				Mtmr7	-1.89727	0.298512	2.79986e-08	364	398	313	346	328	195	855	892	818	962	1014	1048	820	794	1106	2303	1852	1638	236	238	1075
Mvb12b	4.7783	0.587755	7.91317e-11	655	549	393	183	430	456	46	80	56	11	11	13	19	40	67	2	3	10				Slc6a3	-6.66508	0.935504	2.79986e-08	0	2	1	0	1	0	26	15	16	110	125	134	0	2	0	0	0	0	0	0	67
Btnl2	-8.26644	0.749383	7.97056e-11	0	0	0	0	0	4	834	942	971	2130	1935	2199	67	44	344	44	101	205				Btnl6	-5.73403	0.750212	2.81209e-08	2	6	2	2	0	0	1116	1352	1269	3093	2734	2743	136	171	1212	860	1113	1286	5	1	1231
Gm2061	-7.56171	0.75708	8.02322e-11	0	0	0	0	2	0	520	667	490	1131	753	884	204	183	1367	84	153	366				Mxd4	1.50181	0.242862	2.92308e-08	2972	3052	2203	1646	2515	2416	1562	1616	2003	1172	1325	1467	1190	1151	1513	2118	1822	1733	2980	2825	1188
Apoa4	-12.0056	0.843009	8.374e-11	0	0	1	1	0	0	11586	11953	7425	129819	123181	103130	11	156	363	5	25	3				Cd9-ps	1.30202	0.209352	3.05714e-08	3565	3693	3331	3682	4194	3841	645	805	669	810	941	904	1961	1955	1617	5142	4127	3491	3804	3476	1267
Zfp52	2.41702	0.31078	8.54323e-11	963	898	1104	1209	1167	1167	38	55	41	63	106	70	561	354	144	805	527	421				Col4a5	5.06533	0.678758	3.05714e-08	4829	4217	5312	2983	3740	4398	15	8	9	25	35	44	139	44	47	98	44	8	2238	3366	39
Adcy3	4.38281	0.531606	9.32248e-11	530	401	160	138	267	154	30	37	20	27	25	30	6	19	31	1	0	1				Vps13c	1.62893	0.266297	3.05714e-08	2213	2281	1647	1865	1771	1434	1018	1124	1356	723	796	904	1331	1624	2836	3024	2035	1803	1967	2719	1226
Chn1	4.1598	0.487991	1.01883e-10	255	212	325	165	289	359	12	18	21	12	11	15	10	12	11	9	13	14				Usp43	-1.41104	0.230248	3.19725e-08	923	941	1044	1261	1492	1376	1684	1915	1756	1702	1904	2161	2792	3345	1810	2934	2435	2561	961	1269	2216
Defa34	-7.46791	0.826432	1.03679e-10	0	0	0	0	0	0	426	493	839	899	639	775	59	146	1610	0	1	0				Hnf4a	-1.55817	0.247919	3.31607e-08	7708	8110	6980	7094	7861	7735	36992	36073	33179	36207	39855	41499	18360	21851	33478	38900	33212	29838	10347	7745	41622
Inhbb	6.98599	0.655826	1.11054e-10	495	548	190	25	64	133	3	5	2	1	1	4	0	0	3	0	0	0				Tubb2a-ps2	-2.66858	0.448813	3.34487e-08	108	109	105	107	235	109	79	84	88	227	178	196	312	209	65	119	77	102	62	51	78
Kctd14	3.67126	0.488679	1.11246e-10	5719	5696	8505	8198	4466	4822	2344	2887	1121	735	595	996	212	289	791	102	102	96				Cd24a	2.41008	0.394306	3.36824e-08	37576	38106	46401	33320	34691	38288	15213	17588	20862	8344	8114	9679	6133	8405	16658	8370	5207	2807	27285	36076	11652
Il6st	2.04266	0.281951	1.11445e-10	5201	5873	4802	3282	3890	4253	1375	1529	1704	898	964	1198	1794	1748	1495	2406	2138	2181				Maf	-4.1842	0.611022	3.41814e-08	6	4	3	15	8	8	639	717	688	781	576	528	276	138	588	363	244	121	10	8	624
Pygl	3.62464	0.52151	1.13904e-10	614	560	408	171	74	173	318	345	340	99	105	110	24	22	298	53	50	52				Grasp	1.85505	0.300444	3.47269e-08	2423	2396	1758	1337	1735	1658	456	551	465	283	380	406	886	850	714	1189	800	793	1774	1772	698
Camk2n1	3.56692	0.495148	1.14063e-10	3194	2883	5034	1079	2054	3575	1343	1486	1512	647	499	632	359	427	1988	869	935	1825				Ckb	-5.11133	0.774855	3.59672e-08	89	61	119	541	767	393	2792	2718	2203	9856	9074	9752	778	1204	961	876	844	860	19	84	3846
Gad1os	5.49286	0.606348	1.14522e-10	134	121	137	76	76	92	6	1	13	3	0	1	4	3	9	1	1	4				Cdc7	-2.01636	0.327492	3.90626e-08	196	222	232	293	257	253	613	605	628	433	504	542	699	1098	442	710	676	936	169	252	624
Blnk	-1.37043	0.19227	1.15765e-10	840	936	811	952	859	864	2773	2912	2862	1954	2035	2027	2660	2635	2350	6217	5659	5595				Fkbp9	3.92137	0.584301	3.9175e-08	5120	4657	4426	3939	4436	4353	766	871	740	314	447	408	829	707	462	1869	1559	924	3823	4941	79
Guca2b	-7.76979	0.68624	1.19945e-10	5	6	3	5	6	3	973	1005	1020	7742	6030	5996	227	540	1531	380	397	519				Prom1	1.65483	0.269286	3.96531e-08	68450	68146	84967	53381	48227	61707	16098	17314	17360	12393	13632	13586	22455	15888	18704	41426	37622	41121	29679	42310	13775
Psrc1	2.40721	0.325378	1.22878e-10	4941	3925	3989	2526	3707	4489	876	909	912	499	604	654	2244	1698	1532	1029	1232	1032				Creb3l3	-5.98203	0.868991	4.01207e-08	4	3	0	1	5	2	1716	1979	1364	10267	10475	9838	162	74	177	407	179	239	25	1	2856
Npc1l1	-8.27162	0.684853	1.27305e-10	6	7	4	5	2	6	4694	4413	4185	18335	18259	17681	176	422	3290	2	21	15				Ncmap	3.50951	0.521957	4.01605e-08	1563	1462	1481	500	630	669	84	107	74	98	111	120	106	51	50	238	212	254	1307	1625	113
Slc3a1	-6.49061	0.617191	1.27641e-10	10	9	12	5	16	18	2610	2996	2578	7283	6146	6117	225	254	2235	420	261	186				Bace2	3.08352	0.501501	4.09316e-08	6392	7941	3946	4122	3725	3557	897	1137	1349	353	443	353	1143	950	1441	553	504	734	5919	4068	960
Zg16	-7.95542	0.736939	1.3211e-10	0	2	0	0	1	0	688	1060	1743	2492	2742	1981	167	340	3525	1099	1074	1506				Cd2ap	1.06721	0.17342	4.14813e-08	16268	17382	12589	12540	12730	13780	6753	7311	6902	6820	7576	7306	12780	11450	9245	13060	10248	9609	18340	20391	7529
Acpp	-4.78917	0.52118	1.33011e-10	30	23	4	5	7	3	2306	2295	2190	978	990	1184	233	482	1151	18	17	11				Mycbpap	2.48921	0.393172	4.28456e-08	649	646	463	442	447	468	161	184	136	139	146	127	227	119	196	173	224	107	408	479	94
Pirt	5.26437	0.56305	1.38793e-10	374	349	130	61	103	237	28	33	25	9	11	14	0	1	6	0	0	0				Mcub	4.30457	0.687139	4.40047e-08	244	216	129	107	98	111	51	38	45	5	8	3	9	9	28	11	6	17	127	177	14
Ccpg1os	2.12753	0.301641	1.43159e-10	406	377	321	297	243	307	206	244	199	106	112	125	114	93	202	234	208	199				Txnrd2	-1.60324	0.262681	4.47956e-08	254	326	290	371	324	326	674	791	619	792	786	962	757	1017	633	498	467	449	302	376	752
Chic1	-4.22178	0.507847	1.43763e-10	18	8	14	3	9	8	257	252	319	330	382	356	649	713	1004	252	350	648				Casp1	-4.97291	0.723306	4.53868e-08	4	15	2	17	26	1	3868	4023	4050	3348	3597	3930	1737	2013	3796	3888	4113	4009	6	2	1183
Hoxb3	-5.93471	0.806609	1.45883e-10	0	0	0	0	0	0	29	22	42	19	42	19	905	880	270	195	369	943				Vtcn1	3.8099	0.567707	4.64738e-08	4657	4552	3696	3130	4561	5425	30	55	36	30	30	32	126	112	72	109	61	13	3081	2998	62
Phactr2	2.67101	0.366533	1.48779e-10	1168	1221	1036	669	733	1007	283	328	409	169	199	183	219	179	271	198	281	264				Pxdc1	-2.58387	0.431182	4.87697e-08	298	238	194	258	432	311	448	521	368	932	867	859	500	159	115	377	282	311	196	188	362
Vill	3.70423	0.443912	1.52551e-10	17755	16955	14758	9840	12289	13097	556	717	457	381	474	321	1779	998	397	2702	1838	1022				Bsg	2.19597	0.363352	4.97234e-08	258502	220915	266847	152595	108321	146086	42746	50531	32332	40320	38358	40200	26806	21112	42305	53955	59230	49884	79474	128834	45328
Themis3	-5.17166	0.563205	1.55233e-10	38	35	11	36	19	9	1033	1275	997	2405	2345	1993	1211	845	2399	1616	1457	1368				Suz12	-1.33742	0.220003	4.97234e-08	2926	2992	3416	4192	3939	3512	5250	5714	5205	6015	6045	6563	6359	7592	5309	6242	5508	5584	2897	3993	6628
Slc6a4	-5.75912	0.61691	1.55882e-10	2	0	0	1	3	1	941	1005	972	636	750	883	3	10	138	16	13	21				Lyar	-1.48881	0.247424	5.00158e-08	829	828	865	1345	1392	1226	1324	1456	1503	1450	1531	1784	2018	2624	1244	1566	1288	1356	1191	1287	1844
Tvp23b	1.1613	0.167084	1.57204e-10	2134	1932	2027	1931	1788	1882	1368	1585	1431	1265	1271	1417	971	846	1480	1865	1844	1603				Xbp1	1.7789	0.289683	5.00158e-08	15767	15220	17921	12140	10836	13201	6985	7371	6661	6495	7058	7357	4998	4332	5695	5645	4645	4100	11318	23949	7130
Fgd3	2.24648	0.295668	1.57918e-10	2204	2076	1730	1990	2961	2416	188	209	137	116	178	153	1464	814	317	788	668	752				Creb3l1	2.32055	0.389389	5.0552e-08	4796	5840	5993	4745	4388	4926	2139	1949	1326	712	964	1072	1187	1713	3366	1326	1179	533	4493	8267	3229
Mboat2	3.34826	0.414379	1.58922e-10	2146	2362	2087	1857	1605	1792	115	117	76	152	80	129	111	49	43	1100	653	594				Rgs17	3.99938	0.568862	5.09739e-08	741	834	344	594	958	754	16	19	27	6	4	11	6	3	6	2	4	3	586	327	23
Itgb6	2.04915	0.27251	1.62512e-10	5808	5179	6858	6258	9287	9639	607	632	782	542	598	612	2801	2254	782	1423	1133	972				Gnpda2	1.21702	0.203159	5.22072e-08	765	713	600	524	671	661	576	567	566	295	382	398	278	380	597	557	468	403	531	625	460
Ampd3	2.13752	0.306733	1.66312e-10	1226	1259	1525	1301	1376	1338	1121	1184	951	652	628	626	594	500	1761	1366	1209	1179				Sorbs3	4.29232	0.721271	5.33063e-08	1632	1799	1171	880	995	878	192	186	160	20	13	16	114	107	141	93	178	238	1242	1453	89
Ttll7	2.9825	0.380274	1.68745e-10	1871	1805	1976	2246	2796	2179	109	117	162	156	205	137	200	251	139	400	208	133				Cdhr5	-5.1481	0.748945	5.48732e-08	12	48	29	74	9	5	8807	9484	9338	27492	26043	25704	7467	6931	12022	25962	24754	25496	70	248	12994
Enpp5	2.28017	0.3204	1.70285e-10	2927	2617	2623	1715	1829	2118	1169	1205	1106	568	612	680	681	508	940	1091	1083	947				Agtrap	1.4497	0.23969	5.52738e-08	1895	1809	1581	1475	1697	1662	1082	1069	1013	630	726	741	990	1047	969	1491	1341	1067	1428	1765	926
Mrps31	-1.01849	0.145487	1.7199e-10	845	954	760	938	795	833	1978	2134	2152	1870	2033	2148	1356	1528	1624	1064	939	866				Mageh1	3.74722	0.610671	5.52939e-08	196	200	88	57	95	59	43	52	48	8	13	10	10	12	25	8	3	5	196	170	31
Sema3c	2.57133	0.340282	1.81106e-10	7221	7074	5528	5730	6407	5994	430	521	493	693	880	662	6816	3963	3325	9411	7596	5701				Scmh1	1.12375	0.183682	5.77064e-08	3214	3209	3050	2953	3538	3131	1109	1086	1214	734	913	984	2029	2138	1228	1939	1571	1399	2981	3311	935
P3h4	3.22807	0.434494	1.88249e-10	1271	1085	889	368	702	704	218	250	214	105	110	127	110	100	174	182	147	90				Cd164l2	3.62636	0.630599	5.82994e-08	144	128	89	22	36	33	18	24	18	6	4	8	2	4	11	5	3	2	60	73	24
Anks6	3.36984	0.458977	2.03179e-10	387	438	298	242	244	254	126	146	131	41	40	50	29	26	68	6	15	10				Ppp1ccb	-1.06972	0.176661	5.91639e-08	617	650	704	729	783	684	1249	1403	1367	1374	1366	1554	951	1192	1053	1245	1049	1012	711	819	1487
Atp10d	4.00876	0.47705	2.03179e-10	540	493	478	247	336	400	13	19	26	12	20	10	38	36	14	33	27	34				Ccdc134	-1.82896	0.30241	6.26756e-08	449	468	401	360	407	384	1328	1334	1063	1437	1599	1501	623	968	531	593	560	464	377	475	874
Ptp4a3	2.28946	0.305674	2.16591e-10	4703	4023	3731	3527	5786	5263	321	414	342	388	545	512	2303	1527	903	3184	2356	1487				Ccrl2	3.15492	0.530038	6.26756e-08	165	167	149	61	87	123	21	37	33	18	6	12	30	16	48	40	39	32	70	86	23
Adssl1	4.16231	0.513873	2.25537e-10	1331	1165	1067	799	918	1145	89	134	115	23	32	43	75	44	61	130	112	95				Slbp	-1.21261	0.200897	6.30337e-08	714	764	822	870	941	832	1651	1759	1862	1258	1420	1514	1606	2204	1323	1549	1422	1413	739	931	1604
Slc1a2	8.26263	0.712458	2.36666e-10	311	261	741	631	426	373	0	2	0	1	0	1	1	1	3	1	1	1				Hectd2	4.29852	0.599033	6.45097e-08	172	119	132	93	99	102	2	9	3	6	1	3	0	0	0	0	1	0	41	54	7
Exph5	1.54382	0.225314	2.41403e-10	1180	1256	1136	927	783	831	726	862	1078	607	578	615	891	1100	1753	2346	2220	2140				Klhdc7a	3.73133	0.574458	6.744e-08	4214	3965	3890	2642	3519	3969	168	268	213	57	71	60	1022	767	321	1154	982	722	2868	2546	115
Fbxo2	6.0977	0.642054	2.43246e-10	428	395	491	113	134	165	12	1	0	8	7	6	3	5	16	2	3	3				Zswim5	-4.26746	0.648049	6.84993e-08	3	11	11	55	32	27	796	709	804	868	838	938	364	494	589	557	448	442	9	32	738
Tmem161b	-1.20561	0.175025	2.49413e-10	603	625	685	722	701	594	954	1007	1046	1004	1021	1156	979	1168	649	801	622	689				Plekhg1	2.08466	0.352437	6.86667e-08	536	601	351	322	370	365	542	554	632	249	262	306	131	139	301	636	599	558	391	567	379
Cyp21a1	8.52503	0.753927	2.56929e-10	822	661	907	331	1085	1003	0	0	0	0	1	1	6	7	1	10	9	6				Gabrp	6.7252	0.754791	7.023e-08	1905	1960	3761	961	1677	4286	0	0	0	0	0	0	13	12	1	824	447	267	2263	1011	2
Gm2a	2.60106	0.35183	2.56929e-10	6488	5621	4733	2856	3153	4065	763	917	668	597	661	659	1350	1050	878	1166	1045	815				Taf5	-1.16116	0.193642	7.09111e-08	298	320	346	337	338	306	517	565	485	525	541	606	508	639	366	429	361	360	289	404	651
Kcnk5	-3.21941	0.416144	2.64153e-10	172	230	179	101	135	123	1345	1413	1357	2242	2187	2452	737	856	975	1098	917	756				Traip	-2.33976	0.39142	7.10045e-08	132	176	206	328	336	264	341	346	329	324	378	385	542	863	292	454	361	208	138	220	470
Aldh18a1	-1.97043	0.278239	2.70949e-10	3929	3588	4186	4762	4101	3594	11380	11179	11694	14367	15329	17688	7163	7372	6587	3800	3317	3014				Sytl2	2.98738	0.481982	7.14817e-08	2576	2829	930	1139	1574	1211	706	801	973	577	707	568	1491	1301	2178	1553	1251	1392	9372	3340	1284
Nlrp1b	-5.02585	0.576854	2.78203e-10	1	5	4	2	0	0	377	414	386	525	392	500	20	30	219	217	284	239				Fbp1	-5.25732	0.720855	7.18931e-08	13	29	5	2	12	5	1684	1997	1671	2696	2541	2503	50	77	384	1	4	0	3	3	840
Ncf2	-5.03226	0.654871	2.81126e-10	0	0	0	1	0	1	37	47	34	29	42	47	143	156	202	356	422	485				Gm38910	1.90569	0.312889	7.37752e-08	241	251	294	311	402	330	124	147	117	73	87	86	120	135	157	197	160	158	320	312	105
Dcxr	2.20324	0.306022	2.86632e-10	4358	4495	4963	3019	3441	3679	733	961	627	843	873	940	1302	983	1064	7234	7324	5177				Klhdc1	2.50874	0.415033	7.37752e-08	352	368	279	286	256	294	143	187	194	63	76	73	144	124	165	226	186	139	456	380	128
Cfb	-2.28715	0.311397	2.9605e-10	19	32	33	17	17	13	230	263	258	217	218	244	96	103	211	35	54	40				Ttyh3	-2.22866	0.351964	7.60958e-08	1481	1391	1539	908	2227	1954	4203	4107	3901	2263	2413	3084	1522	2118	2301	1411	1661	1677	628	864	5652
Kcnn1	3.49092	0.465476	2.98363e-10	157	132	75	77	62	117	15	25	17	9	9	18	18	22	30	38	40	27				Galnt7	1.51608	0.252757	7.6789e-08	11214	12684	10482	12471	10241	8881	5958	6501	5659	6351	6386	6527	5127	5199	8813	8705	8564	8363	15929	13193	7471
Jak3	2.9955	0.417262	3.07227e-10	2200	2285	3184	1448	1474	1967	731	842	855	313	306	388	255	230	451	888	867	735				Zfp563	1.89192	0.320972	7.92898e-08	142	153	132	96	97	123	116	146	138	74	50	94	63	81	143	93	115	99	92	175	87
Sipa1l2	-1.29419	0.187831	3.07513e-10	674	888	572	830	765	748	1363	1395	1492	1279	1378	1619	1317	1338	938	763	611	560				Ncf2	-5.31938	0.671926	8.08957e-08	0	0	0	1	0	1	37	47	34	29	42	47	143	156	202	356	422	485	0	2	150
Ctgf	5.86291	0.560808	3.22521e-10	20661	16378	26316	60515	78322	86553	33	64	20	66	204	93	12858	6628	986	8639	5316	3449				Naglu	1.13847	0.19183	8.37308e-08	1595	1667	1598	1314	1480	1582	824	988	844	596	674	714	829	783	948	1390	1329	1265	1203	1511	1034
Mmp11	3.90884	0.491411	3.22521e-10	430	450	299	153	299	276	20	40	27	8	22	13	53	45	39	46	36	37				Mpp2	2.42685	0.413259	8.37408e-08	760	777	813	548	808	675	107	90	71	43	53	66	34	16	76	41	67	39	436	252	178
Gprc5b	4.38204	0.49336	3.24974e-10	1060	1015	2121	2287	3149	1923	47	51	37	17	41	27	85	75	28	7	12	11				Lgals2	-4.77116	0.675575	8.93509e-08	275	798	172	740	108	96	36938	28551	24096	19095	23139	25194	9069	13186	22264	23	37	25	225	115	21969
Stx11	3.91788	0.460184	3.2801e-10	467	373	517	759	869	705	3	9	14	22	11	18	85	88	30	25	15	11				Acot4	-4.41094	0.679534	9.00396e-08	11	12	5	9	5	2	278	329	296	1001	1144	1110	93	115	110	244	244	281	31	13	535
Tubal3	-4.05036	0.48323	3.34373e-10	37	37	6	9	30	18	906	962	862	1070	1078	1079	175	245	583	65	91	64				Cish	2.73992	0.46934	9.00396e-08	1012	968	917	438	793	737	455	546	512	203	167	186	296	232	423	408	378	282	812	884	353
Lmnb2	-1.29517	0.188092	3.59499e-10	1341	1715	1480	1597	1738	1592	3119	3245	3121	3057	2929	3654	2863	3989	2471	4772	4108	3863				Creb3l4	2.3475	0.397751	9.05688e-08	1378	1651	1901	2264	1883	1775	625	549	591	240	251	321	206	295	596	270	277	209	1059	2040	568
Nipal1	-2.34553	0.328547	3.64438e-10	645	645	263	584	665	501	2381	2488	2517	1903	1989	1910	3741	3396	2214	2825	2277	2289				Rab32	-1.14414	0.194043	9.08863e-08	301	290	292	327	376	374	280	328	288	337	384	371	622	684	297	1149	964	876	271	368	301
Mreg	-4.78952	0.577518	3.70252e-10	1	1	8	9	9	6	191	165	272	253	256	350	135	311	282	1	6	3				Tm4sf20	-5.94598	0.854685	9.37345e-08	80	114	21	25	10	0	6845	8708	8848	16951	17008	15688	3086	3122	5026	10009	8821	5947	29	11	7362
Osbpl5	1.85474	0.260745	3.75252e-10	2295	2267	1909	1561	2528	2259	397	463	506	468	524	404	1310	939	873	1406	1112	896				Irx2	5.26395	0.853857	9.46076e-08	406	505	1506	91	65	901	2	15	20	6	10	9	13	46	53	0	0	0	371	1552	24
Lrrc8e	2.88087	0.398465	3.767e-10	833	815	605	528	394	393	169	193	123	81	94	82	125	128	141	442	451	400				Tnik	-2.73111	0.433059	9.5935e-08	429	529	378	374	248	253	1884	1958	2002	2896	3127	3169	1771	1991	2616	2296	1808	1634	266	154	2070
Gif	7.23763	0.693661	3.78468e-10	6873	2998	1059	494	653	416	11	28	28	3	1	2	0	0	1	0	0	0				Slc13a1	-7.48287	0.837882	9.6424e-08	0	0	0	0	0	0	911	1436	1368	2083	1610	1743	40	136	469	124	252	506	0	1	1152
Alpk1	2.20382	0.317819	3.88343e-10	934	946	599	418	545	674	292	329	392	177	210	231	646	716	964	858	886	846				Slc15a1	-6.45198	0.830239	1.00709e-07	5	2	8	3	9	5	399	602	476	2446	1786	1525	22	50	309	372	289	146	2	1	1145
Tceal9	1.91233	0.276393	3.96901e-10	2667	2476	2344	2546	2883	2592	1403	1626	1428	796	809	946	1153	1754	2055	879	810	616				Pbx1	2.53327	0.424606	1.01177e-07	4240	3808	4068	2722	3985	3824	2139	2341	2722	866	929	1054	1844	1961	2292	1415	1778	2258	2434	4386	1020
Slco5a1	5.12878	0.571834	4.0275e-10	265	177	613	384	596	649	2	2	1	6	3	5	82	54	20	133	100	102				Cyp1a1	-6.02727	0.884647	1.01905e-07	1	0	0	0	1	1	24	28	16	187	120	152	141	201	95	242	222	144	0	0	146
Rfx2	2.57424	0.361237	4.05612e-10	419	410	303	234	349	339	125	140	128	43	80	114	60	57	97	54	56	38				Irf2bpl	1.53769	0.256651	1.04669e-07	2557	2421	2437	1979	3026	2905	1173	1383	1356	1113	1189	1221	1741	1365	1533	2889	2357	2397	3188	3174	1491
Snx33	2.3497	0.328196	4.10055e-10	1531	1471	1163	967	1020	1049	300	342	344	180	196	181	617	523	449	694	604	575				D930020B18Rik	2.74936	0.471619	1.05401e-07	213	209	192	191	116	135	50	44	66	19	14	30	5	3	26	8	11	2	76	120	53
Tbx3	-7.99888	0.750531	4.51875e-10	0	1	1	0	0	2	1549	1444	1213	832	886	848	894	1035	1533	8	253	453				Ndnf	5.51211	0.738313	1.05401e-07	2946	2374	2351	3325	4897	3497	3	4	0	12	14	5	57	15	14	300	138	46	1621	1301	14
Ppp2r2b	8.20544	0.700117	4.69954e-10	2434	2521	1969	510	890	1346	3	4	4	0	0	0	21	8	2	0	0	0				Gcat	-2.81075	0.472619	1.06262e-07	142	135	158	268	211	151	383	436	299	850	829	873	269	418	186	258	232	214	116	149	477
Cd63-ps	1.02122	0.150416	4.73615e-10	3456	3558	2789	2987	3747	3509	2096	2298	2502	1964	1965	2067	1732	2063	2295	3386	3323	3149				Xylb	-1.63614	0.270416	1.0947e-07	403	372	272	302	405	309	1917	1838	1789	1106	1140	1397	661	926	732	665	662	636	273	463	1446
Mid2	1.0977	0.160574	4.78877e-10	1360	1355	1369	1336	1503	1387	673	704	761	565	658	617	1126	954	1053	1487	1145	990				Gadd45g	2.1886	0.352666	1.11257e-07	542	629	671	595	604	711	104	127	118	113	111	107	140	114	85	128	155	155	420	1014	109
Hpd	-6.44793	0.730707	5.30866e-10	2	0	0	0	0	0	757	762	879	206	185	280	122	154	814	67	114	77				Eps8l3	-1.43544	0.238755	1.11724e-07	5168	5208	4429	4108	3381	3378	13081	13227	12924	13598	15248	15282	13055	11677	13101	19241	16289	15558	4408	5000	15599
Mmp20	-5.78042	0.725752	5.3201e-10	0	0	0	1	0	1	80	111	101	100	98	116	74	49	182	14	28	31				Zfp36l1	1.75085	0.293571	1.11856e-07	13941	12769	12332	7411	9206	10850	6074	5736	5634	3310	3603	3827	5245	4438	4567	4195	3237	3146	9937	11608	4626
Cebpd	3.17497	0.443906	5.32229e-10	911	894	506	261	619	690	167	229	259	94	97	99	99	108	202	268	236	245				Hoxa3	-4.80219	0.701393	1.12272e-07	1	0	0	1	0	0	67	67	39	87	81	138	44	122	173	849	738	618	1	5	234
Acvrl1	4.52107	0.569701	5.35227e-10	346	300	170	169	251	321	24	45	48	6	9	8	19	18	49	11	9	4				Pdxdc1	1.24725	0.212363	1.17775e-07	16030	15948	12643	11009	9650	10006	11301	11979	12023	7871	8538	9138	7836	8242	10739	16600	14366	11306	14736	15893	11911
Slc25a35	2.03792	0.297066	5.4e-10	1276	1445	1324	818	669	852	508	505	492	405	392	452	402	636	703	958	1003	917				Krt17	5.9468	0.727538	1.18956e-07	2	3	4	1	1	2	6	7	1	1	3	2	8	9	3	5	7	4	402	182	1
Elk3	2.76571	0.360717	5.491e-10	1628	1623	1819	1883	2968	2777	61	88	72	115	173	94	1606	1022	471	1503	1193	1287				Tph1	-6.54811	0.804162	1.19123e-07	9	7	3	0	7	5	1096	1186	2067	457	384	480	57	166	639	75	90	39	0	0	1237
Ppm1k	2.12623	0.310116	6.20224e-10	536	458	542	349	407	574	284	261	268	156	144	203	152	198	321	282	177	170				Glod5	-4.2322	0.619514	1.19475e-07	3	9	7	4	5	2	1041	1077	1068	1561	1445	1526	96	123	839	496	554	502	3	8	633
Fam83b	-2.32207	0.325062	6.30141e-10	525	620	672	655	644	584	2551	2894	2489	3771	3915	3839	1948	1866	2325	1791	1357	1327				Nlrp10	4.28814	0.720207	1.24013e-07	1527	1072	1328	244	196	494	31	39	27	26	24	32	13	7	27	503	268	110	153	105	8
Cds1	-3.79626	0.464253	6.33549e-10	324	273	145	187	301	87	5436	5889	5104	7204	7699	7663	1791	2332	5171	3790	3870	3830				Ccpg1	2.23039	0.377948	1.24399e-07	314	304	235	167	161	204	148	127	136	66	62	70	81	70	118	113	100	93	195	261	69
Insl6	-3.61395	0.462277	6.36199e-10	20	19	18	10	23	11	261	306	212	384	414	409	207	163	355	218	274	189				Nr2e3	-6.94374	0.882301	1.26412e-07	0	0	0	0	0	0	201	217	99	72	101	126	6	24	48	0	1	1	0	0	336
Wls	1.77911	0.257003	6.86264e-10	7588	7053	8812	7153	8519	8788	2855	2927	3043	1730	1975	1946	6747	5617	5656	9484	7689	7517				Apob	-5.02355	0.76615	1.29071e-07	2716	4695	2142	4251	18594	15515	20186	20788	21842	75148	70445	66809	11505	9086	15476	271	79	77	527	943	17837
Aga	1.42657	0.209641	7.03114e-10	1722	1423	1501	1148	1664	1593	780	844	813	559	657	631	788	704	854	778	880	757				Atp10d	3.00803	0.46708	1.3235e-07	540	493	478	247	336	400	13	19	26	12	20	10	38	36	14	33	27	34	257	378	29
Tfcp2l1	2.68757	0.379001	7.1859e-10	3155	4163	2123	2301	2199	2036	585	735	862	292	473	437	755	698	763	6068	5718	5516				Psrc1	2.3367	0.391986	1.32683e-07	4941	3925	3989	2526	3707	4489	876	909	912	499	604	654	2244	1698	1532	1029	1232	1032	3579	3768	1328
Rcan3	1.23542	0.182032	7.22866e-10	1344	1375	1239	1351	1455	1374	640	648	641	546	640	618	1345	981	1321	1755	1395	1499				Cd63	1.11672	0.18966	1.32759e-07	1625	1646	1317	1334	1817	1655	887	1007	1092	806	863	983	787	991	998	1585	1522	1477	1928	1657	1150
Bach2	3.91431	0.522635	7.27721e-10	209	208	272	185	152	208	45	48	71	7	20	20	19	17	57	11	6	10				Dcxr	1.90622	0.319204	1.36087e-07	4358	4495	4963	3019	3441	3679	733	961	627	843	873	940	1302	983	1064	7234	7324	5177	3238	4159	1318
Tor3a	1.21223	0.178759	7.2942e-10	880	881	754	805	910	840	439	443	424	334	404	347	667	514	639	851	662	658				Slc6a7	-6.22993	0.819936	1.36401e-07	0	0	0	0	0	1	397	340	282	86	145	148	118	223	215	141	135	123	0	0	369
Fam83c	5.8124	0.633386	7.49011e-10	257	375	175	321	75	216	3	3	4	4	0	4	13	13	11	7	2	1				Tle3	1.15919	0.199471	1.37445e-07	4221	4888	4231	3051	4093	4503	3240	3533	3413	2037	2454	2432	3186	3418	5357	4812	4067	4158	4933	4476	4398
Pak6	2.01987	0.279536	8.03209e-10	2029	2086	1971	1577	2071	2080	239	254	236	186	192	268	718	762	245	508	409	276				Disp1	1.77564	0.296155	1.38028e-07	1227	1372	987	1025	1296	1214	364	479	425	278	315	308	484	468	432	532	374	377	1759	993	449
Papln	-5.62296	0.593227	8.03209e-10	22	11	19	0	7	2	2387	2141	1024	1379	1489	2046	115	303	437	10	19	14				Sh2d3c	1.71417	0.29128	1.38028e-07	387	334	257	207	314	302	89	90	72	81	86	60	109	87	136	215	182	193	212	265	115
Cyp2c52-ps	-4.71814	0.642318	8.119e-10	4	1	0	1	2	3	17	9	13	25	43	35	70	76	15	18	15	16				Trim3	1.62062	0.272055	1.38028e-07	1484	1324	1428	891	1146	1280	369	367	443	311	294	348	593	492	413	533	451	449	885	1368	445
Zfp251	1.275	0.189387	8.29599e-10	755	646	578	563	546	668	331	409	422	267	312	344	394	434	474	604	566	631				Bcat2	1.31616	0.22019	1.52335e-07	4844	5600	4037	4021	3947	3934	1237	1329	1089	977	1039	1180	2038	2152	1141	1983	1516	1306	5596	6139	1620
Slc25a30	1.22809	0.178521	8.35862e-10	1342	1233	1455	1264	1210	1316	322	331	309	286	349	357	784	711	377	779	564	514				2510009E07Rik	2.81866	0.558195	1.60149e-07	276	243	90	70	69	113	121	129	135	27	24	30	10	24	165	7	13	19	58	157	94
Slc6a14	5.33261	0.640239	8.36284e-10	71	94	152	201	292	271	1	0	1	7	2	0	200	212	200	2960	3170	2814				Fbxl20	1.44307	0.246953	1.61459e-07	4071	3997	3393	2343	2846	3130	1975	2129	2062	1342	1353	1588	1789	1363	1866	2249	1907	1668	3149	3678	1942
Ano6	-1.48192	0.218457	8.56841e-10	3620	3344	4037	3457	4885	4018	8064	8596	8104	8747	10408	9979	4259	4215	3687	4083	3145	3465				Tle2	2.9952	0.517711	1.61459e-07	1331	1412	711	288	409	609	255	200	195	128	130	105	93	71	145	115	90	115	602	969	295
Herc3	-1.47256	0.215158	8.85414e-10	694	690	596	449	502	544	1861	1802	1603	1587	1798	2015	1875	1590	1745	1645	1472	1275				Otop2	6.35843	0.915441	1.62338e-07	226	229	224	42	89	214	0	0	0	0	1	0	0	0	1	0	0	0	36	143	0
Iyd	4.38496	0.545993	8.88289e-10	1632	1911	926	758	427	983	281	358	445	133	69	91	1	3	13	51	41	23				Slc41a1	1.18328	0.202812	1.6245e-07	2083	1879	2384	1900	2108	2363	890	899	879	562	635	821	929	968	1213	1672	1627	1397	1215	1670	768
Rapgef3	2.44139	0.354056	9.0481e-10	578	472	402	252	268	295	143	175	180	105	108	162	222	173	402	100	90	56				Col17a1	6.65646	1.00219	1.65834e-07	31	10	24	19	15	10	10	11	29	0	2	0	0	7	1	8	30	3	4720	839	7
Syngr1	1.7074	0.250687	9.25517e-10	4620	4909	4054	3196	3148	3311	1669	1816	1582	1613	1778	1876	505	741	798	449	347	452				Tspan2	4.50654	0.659031	1.65834e-07	1595	1485	718	347	460	603	19	22	20	70	69	51	54	49	37	19	14	15	1171	1266	38
Cxxc5	3.4082	0.487777	9.39519e-10	755	709	570	272	744	585	227	291	391	115	82	101	43	82	221	18	11	13				Galnt4	1.35614	0.234061	1.72145e-07	8034	9290	7781	7646	5187	6111	4473	4943	5431	3204	3278	3616	4118	4064	5729	5113	5412	5591	5587	6636	4443
Gm7849	-7.83785	0.850721	9.53069e-10	0	0	0	0	0	0	200	295	525	762	594	672	52	181	775	0	0	0				Lyz1	-6.39829	0.889044	1.72145e-07	9	3	295	86	106	247	26021	26934	29565	29671	24148	28369	9541	19439	61950	26	53	13	11	34	17353
Eml5	3.28053	0.431991	9.61327e-10	375	390	266	196	288	255	29	27	43	16	23	21	54	56	30	12	20	11				Cd9	1.36354	0.230228	1.73489e-07	9466	10451	8651	10427	11829	10706	1880	2228	1818	2337	2522	2587	5642	5342	4639	13744	11001	9006	10863	9990	3233
Mycn	3.47042	0.442617	9.84992e-10	2211	2180	1481	693	1845	1953	100	120	100	74	126	156	77	68	46	138	99	79				Arhgap8	1.8064	0.310925	1.746e-07	870	979	911	744	854	812	594	538	484	317	371	367	169	238	329	57	94	26	1044	1601	766
Trim3	1.74086	0.25251	1.0033e-09	1484	1324	1428	891	1146	1280	369	367	443	311	294	348	593	492	413	533	451	449				Sftpd	6.2556	0.75545	1.86975e-07	12471	12286	11741	6784	9014	11494	18	42	107	30	29	36	225	128	7	15	20	0	6700	12393	10
Padi1	5.78169	0.639281	1.00438e-09	89	106	78	9	15	51	6	6	4	1	0	2	1	1	11	1	2	0				Lonrf3	-1.62202	0.275769	1.95593e-07	106	113	73	125	116	76	151	195	190	180	231	213	316	344	275	237	180	188	109	112	320
Amotl1	2.00699	0.278627	1.00455e-09	3041	2709	2528	2633	3922	2759	266	340	211	206	393	269	2857	2060	826	1043	712	959				Cfap43	2.12754	0.352408	1.9681e-07	730	620	482	549	524	486	142	167	182	81	98	132	324	351	200	436	296	364	623	811	98
Col4a5	6.09733	0.608716	1.08635e-09	4829	4217	5312	2983	3740	4398	15	8	9	25	35	44	139	44	47	98	44	8				Rgma	3.24856	0.533793	1.99423e-07	676	482	406	147	320	380	20	23	18	13	14	19	19	22	38	3	4	1	151	250	14
Socs5	1.45965	0.21371	1.14092e-09	1128	1227	1026	1314	1485	1544	349	354	402	337	350	385	989	786	718	984	697	738				Runx1	1.67637	0.280287	2.04257e-07	2471	2811	2627	2356	2719	2579	699	769	516	416	497	429	1350	1080	712	1796	1367	1504	3478	2967	626
Plcg2	2.58681	0.386669	1.19769e-09	1708	1529	2079	1059	1722	1469	1272	1365	1127	475	476	557	356	508	1215	139	203	168				Gfi1	-5.34072	0.706337	2.11361e-07	0	0	1	0	1	0	162	183	200	85	109	124	114	200	292	13	15	15	1	1	127
Lman2l	1.63318	0.240598	1.23533e-09	1457	1432	1331	1066	1405	1644	595	585	603	373	426	456	721	559	651	830	653	722				Tmem38b	1.71815	0.291451	2.12958e-07	969	1003	985	630	603	817	224	297	242	254	309	284	373	350	335	525	446	420	693	993	305
Xylb	-1.81551	0.263121	1.29746e-09	403	372	272	302	405	309	1917	1838	1789	1106	1140	1397	661	926	732	665	662	636				Marc2	-1.5357	0.260182	2.15127e-07	2725	2756	3101	2930	3134	3345	14725	17865	17305	14424	13975	17009	3219	3473	4685	4786	4359	3551	2671	3358	8660
Sult1c2	4.02474	0.601133	1.31234e-09	10875	15264	4279	1385	842	2092	2250	2809	2534	770	704	877	139	245	1354	209	380	250				Rnf125	-2.36869	0.391466	2.1993e-07	44	47	23	34	26	18	267	246	222	124	142	161	140	143	130	188	133	122	42	34	259
Ripor1	1.32039	0.195999	1.31656e-09	1464	1309	1427	1041	1411	1276	580	607	557	392	453	470	696	639	539	1039	845	762				Pim2	-1.66982	0.285792	2.20077e-07	115	119	167	153	201	161	182	192	186	198	213	234	215	210	152	252	203	211	66	109	244
Strn	-1.11361	0.168045	1.31755e-09	1279	1426	1474	1665	1710	1416	2001	2027	2089	2066	2452	2443	3337	2955	2165	3915	2918	2858				Cfb	-2.18069	0.360625	2.21431e-07	19	32	33	17	17	13	230	263	258	217	218	244	96	103	211	35	54	40	15	31	203
Bdh1	-2.00355	0.292635	1.33104e-09	1824	2331	2305	2861	2893	2746	8159	7790	6240	8296	8333	10290	3692	5009	3545	7158	7122	5568				Eda	5.45278	0.66472	2.21649e-07	176	197	113	57	57	82	2	2	3	0	1	2	1	1	0	1	0	0	236	459	8
Vsig1	4.79037	0.518278	1.34702e-09	13223	14130	11046	12823	10585	11777	84	120	110	152	212	110	85	177	23	889	689	197				Nectin4	2.97617	0.477029	2.24216e-07	998	995	763	612	840	781	108	137	109	53	59	57	837	746	375	150	187	97	1408	815	63
Camk1d	-2.32699	0.329618	1.48329e-09	866	752	772	701	894	969	5571	5597	5497	4255	4884	5527	4624	6472	6587	3051	2212	1062				Gm7849	-7.07041	0.90861	2.25274e-07	0	0	0	0	0	0	200	295	525	762	594	672	52	181	775	0	0	0	0	0	734
Slc19a1	-1.39306	0.207398	1.49946e-09	1154	1012	1297	1276	1122	1180	3407	3805	3324	3065	2527	3240	1768	2305	1807	1269	1062	1018				Slc26a2	2.28494	0.380205	2.26424e-07	13090	16041	7206	10190	14863	17743	4718	4368	3873	4097	4304	3798	5401	5229	5181	20917	18821	17498	38317	19164	6063
Tnip3	4.45191	0.520772	1.49946e-09	2177	1413	1968	1904	3747	3630	19	33	12	39	80	36	532	266	186	4341	3039	2240				Cyp2f2	7.0219	1.03682	2.29424e-07	4	2	1	3	0	2	6	0	0	0	0	0	0	3	8	42	54	24	3286	232	4
Klc3	3.12185	0.426426	1.50036e-09	1088	1017	764	547	996	908	113	183	138	74	99	51	347	249	286	189	131	113				Tanc2	2.62745	0.443229	2.30138e-07	2508	2234	2886	1790	1409	1625	281	346	413	179	161	191	295	293	326	154	121	232	1612	2489	294
H2-Ab1	4.23181	0.599848	1.56232e-09	169	148	108	75	66	75	20	29	13	33	26	45	12	6	322	24	28	72				Slc12a4	2.48125	0.391376	2.35521e-07	1177	947	802	789	1388	1041	15	32	12	27	34	28	163	156	46	81	97	51	706	641	45
Fbp2	-2.28067	0.326694	1.65354e-09	1433	1649	1071	1905	1376	1088	5679	6386	5660	7360	7613	8782	4077	4325	4370	7349	6212	5905				AI464131	-1.90677	0.309335	2.4105e-07	380	402	502	356	358	431	1561	1585	1545	811	827	1030	252	415	780	174	179	133	76	193	1379
Adam8	3.39161	0.419826	1.68105e-09	6187	5041	3362	3527	5250	5050	59	89	78	113	191	162	913	501	145	225	124	121				Btnl2	-6.51461	0.841388	2.41592e-07	0	0	0	0	0	4	834	942	971	2130	1935	2199	67	44	344	44	101	205	0	2	806
Sirpa	4.88491	0.613141	1.71003e-09	344	206	161	50	197	199	22	37	5	11	6	7	5	15	35	0	1	1				Pdzk1ip1	3.72842	0.621068	2.41693e-07	3200	3517	1967	1048	1679	1610	697	1040	745	150	205	203	560	335	581	1360	1510	616	3515	5641	448
Hid1	2.16838	0.306037	1.72244e-09	10978	11485	13993	10943	11549	13488	1224	1375	1273	1766	2131	2039	3877	2851	2238	2469	1756	1654				Gmpr	3.34928	0.540803	2.45994e-07	683	550	736	739	827	727	17	12	14	7	5	14	75	50	35	21	29	33	315	485	25
Nr2e3	-6.49758	0.812777	1.76598e-09	0	0	0	0	0	0	201	217	99	72	101	126	6	24	48	0	1	1				Ripor1	1.21083	0.208721	2.47692e-07	1464	1309	1427	1041	1411	1276	580	607	557	392	453	470	696	639	539	1039	845	762	1052	1363	613
Usp46	1.03988	0.15557	1.77674e-09	3170	3309	3237	3895	4351	3823	1235	1262	1310	1051	1190	1223	2403	2543	1600	2827	2137	1912				Otud1	2.9323	0.508088	2.58377e-07	114	134	93	124	120	108	55	62	62	19	27	14	43	35	75	122	88	96	162	124	39
Rora	3.47341	0.490516	1.82816e-09	264	204	261	148	86	129	49	61	65	29	26	19	21	20	50	36	31	55				Akap12	5.83307	0.81193	2.60595e-07	120	87	26	34	81	53	2	2	3	0	2	1	18	4	11	6	2	0	485	122	2
Nars	-1.14988	0.175233	1.84101e-09	9343	9591	9678	11081	11011	9243	13247	12878	12901	13782	16308	16662	22391	22690	13783	12130	11640	11169				Sult6b2	-7.74371	0.95569	2.67503e-07	0	0	0	0	0	0	799	1320	1632	2610	2061	2111	2	7	30	0	0	3	0	0	971
Snap47	1.37228	0.206305	1.86191e-09	1626	1564	1446	1261	1746	1689	747	766	727	708	687	740	782	584	880	1074	953	862				E230025N22Rik	3.32764	0.576272	2.6862e-07	90	104	68	38	37	46	19	19	6	4	2	6	22	16	27	78	84	84	125	131	18
Ptpn13	7.78917	0.609337	1.8642e-09	8851	7958	8853	5471	8742	9812	8	17	15	3	11	6	6	10	1	1148	207	129				Zdhhc1	2.45662	0.437994	2.77642e-07	1256	1230	865	504	571	839	583	586	609	189	195	253	204	202	338	336	328	303	704	1135	458
Fam174b	2.98646	0.431248	1.87437e-09	4337	4745	4372	5307	5627	4848	1814	1948	2015	659	833	870	522	756	1426	727	604	310				Tmem40	3.68798	0.55038	2.81409e-07	718	624	395	476	631	522	8	20	9	32	29	23	267	137	77	67	61	36	781	341	13
Ptprn	4.35561	0.569255	1.89175e-09	708	605	657	784	2017	1713	91	143	169	102	71	88	5	12	51	14	13	17				Rnf130	3.38379	0.619633	2.89358e-07	1528	1665	1571	1224	1585	1403	828	1153	1104	134	160	138	146	204	507	2201	2248	1702	1075	829	238
Kcnf1	-3.14905	0.435021	1.89893e-09	20	44	33	62	30	35	318	415	342	265	253	332	153	226	135	218	208	95				Arhgef2	1.78731	0.305779	3.03276e-07	4109	4271	4460	3407	4490	4082	827	1010	777	1141	1152	1062	1067	1002	1003	2487	1756	1522	2822	3493	1130
Scmh1	1.21311	0.181052	1.96553e-09	3214	3209	3050	2953	3538	3131	1109	1086	1214	734	913	984	2029	2138	1228	1939	1571	1399				Hspb8	5.24026	0.700339	3.03276e-07	14	32	30	13	85	14	5	7	10	5	5	2	13	13	9	2	0	2	448	646	5
Abcc4	1.12433	0.167559	1.98421e-09	4364	4112	3980	4366	4130	4591	895	1081	1136	960	1359	1129	3993	3278	1878	5489	4372	4376				Zg16	-6.23309	0.795928	3.03276e-07	0	2	0	0	1	0	688	1060	1743	2492	2742	1981	167	340	3525	1099	1074	1506	0	3	3651
C530008M17Rik	-6.0645	0.633678	2.07414e-09	6	14	6	1	0	3	500	588	761	1396	1241	1319	163	206	574	1092	790	429				Anp32e	-1.36938	0.238055	3.12578e-07	2466	2641	3335	3812	3688	3320	4859	5013	4812	3979	4295	4829	5666	7582	4478	5982	5003	5155	2367	3475	5761
Ugt2b36	-6.95419	0.756143	2.1324e-09	0	1	0	0	0	2	248	238	250	362	451	450	15	27	78	7	5	23				Pitpnc1	2.08527	0.358917	3.12578e-07	1484	1412	1522	917	1411	1249	169	251	242	97	108	167	575	489	410	615	498	611	866	1137	246
Hspa2	2.96864	0.405986	2.211e-09	1084	1054	780	545	801	786	68	101	74	106	88	117	157	86	114	238	129	115				Alpk1	1.73584	0.307156	3.14086e-07	934	946	599	418	545	674	292	329	392	177	210	231	646	716	964	858	886	846	549	862	391
Hspg2	3.2883	0.492055	2.25896e-09	8624	7058	11549	5032	8768	6478	4281	4346	4329	1067	1228	1674	352	983	2172	666	402	510				Rasgrf2	-3.93008	0.639171	3.15903e-07	37	68	48	263	59	61	1349	1435	1348	1416	1440	1411	760	727	725	15	29	20	93	35	1375
Arhgef2	1.8841	0.276298	2.323e-09	4109	4271	4460	3407	4490	4082	827	1010	777	1141	1152	1062	1067	1002	1003	2487	1756	1522				Reg3g	3.63042	0.664157	3.16671e-07	14955	13731	8911	3962	1630	2646	1297	1923	1990	2067	1887	2070	386	407	6090	0	11	3	15112	22409	6082
Kcnma1	-5.82696	0.742776	2.38474e-09	0	0	2	0	0	0	69	87	72	83	118	137	70	117	208	21	48	25				Dtx3	2.71564	0.467747	3.17756e-07	2229	1933	1349	905	932	1094	269	276	291	109	133	144	619	502	437	226	239	203	971	1458	225
Armcx2	7.70551	0.745989	2.48412e-09	252	153	90	68	47	112	0	1	1	0	0	0	0	0	0	0	2	0				Fam83b	-1.97412	0.337628	3.2434e-07	525	620	672	655	644	584	2551	2894	2489	3771	3915	3839	1948	1866	2325	1791	1357	1327	1011	708	3033
Trpt1	1.67447	0.255671	2.59182e-09	226	208	180	129	129	167	103	117	102	90	94	107	93	94	168	180	139	144				Cyp3a25	-6.55573	0.894823	3.27109e-07	0	0	0	1	0	0	1016	1301	1144	4697	4236	4393	13	28	85	0	1	2	2	2	787
Hpn	5.07224	0.609461	2.6323e-09	2831	2942	2525	673	1517	1732	130	155	44	24	33	47	12	47	20	3	7	4				Meis1	5.80118	0.747636	3.4512e-07	325	311	247	227	205	156	1	1	0	0	0	0	3	4	0	21	21	3	181	215	3
Pgc	5.56636	0.634048	2.68169e-09	4000	5049	9574	5200	6173	3264	147	245	265	53	30	50	4	36	19	2	1	0				Fam124a	4.77857	0.737915	3.46876e-07	37	36	28	8	16	26	1	3	6	3	3	4	8	5	10	224	245	186	25	118	2
Arhgef25	5.42361	0.61622	2.70955e-09	526	341	198	112	217	258	1	9	4	2	3	4	36	20	13	7	7	10				Acvrl1	3.34615	0.593976	3.52018e-07	346	300	170	169	251	321	24	45	48	6	9	8	19	18	49	11	9	4	145	107	30
Fgf15	-4.2689	0.572473	2.72436e-09	1	1	2	2	1	1	87	104	160	120	112	106	1119	1805	5140	21	38	52				Ace2	-6.34869	0.853893	3.58507e-07	8	3	0	4	3	4	3045	3832	4294	13786	12405	12006	237	584	3712	83	65	70	0	16	6773
Htr4	-5.44381	0.68745	2.73089e-09	0	0	1	0	3	0	57	38	46	90	71	119	299	425	535	210	156	146				Fmo4	-6.08718	0.838555	3.63905e-07	9	9	1	9	2	4	619	603	787	869	884	986	20	41	95	7	13	3	0	0	163
Taf5	-1.19045	0.182514	2.73089e-09	298	320	346	337	338	306	517	565	485	525	541	606	508	639	366	429	361	360				Scn2b	-5.21823	0.713971	3.70927e-07	1	1	7	10	1	10	333	413	321	395	414	483	395	491	939	409	417	261	0	2	166
Tlr4	2.76886	0.384188	2.73316e-09	1413	1611	898	1234	1019	917	57	150	95	124	130	113	1216	1008	623	1960	1572	1695				Grb14	3.42935	0.580205	3.79321e-07	437	405	306	306	582	388	55	57	33	11	5	21	17	9	24	1	5	5	490	624	85
Kcnab3	3.09083	0.440306	2.74892e-09	289	233	155	113	107	143	41	29	54	29	22	31	52	48	70	25	21	29				Fmnl3	2.11044	0.360231	3.88063e-07	1178	1035	1226	1005	1695	1209	95	88	104	61	90	62	91	184	88	114	142	123	738	752	157
Pald1	3.39366	0.463966	2.81225e-09	407	430	497	336	467	490	84	73	79	28	32	30	33	48	37	16	28	30				Skida1	4.88357	0.614571	3.97384e-07	62	59	67	40	63	70	2	2	4	0	1	3	1	3	1	3	0	1	123	134	1
Bace2	3.50144	0.488926	2.96643e-09	6392	7941	3946	4122	3725	3557	897	1137	1349	353	443	353	1143	950	1441	553	504	734				Pwwp2b	1.24667	0.218781	3.99078e-07	2269	2150	1618	1685	1668	1640	1119	1279	1148	806	904	921	1605	1582	1459	1649	1288	1261	2534	2282	1383
Gm20554	7.08958	0.781655	2.97969e-09	101	116	326	19	19	112	1	1	1	1	0	0	1	5	16	0	1	0				Sox5	4.24359	0.618244	4.00781e-07	197	222	223	233	226	213	31	22	23	4	7	8	25	35	12	13	7	4	401	582	4
Proser2	1.13182	0.171465	3.14238e-09	2349	2701	2529	2669	2981	2685	972	989	845	758	985	939	1912	1365	1244	1535	1186	1102				Lrrc74b	4.00057	0.746423	4.1253e-07	92	88	76	28	16	21	27	29	17	2	5	3	0	2	7	0	0	0	10	33	5
Nlrp10	5.12768	0.611879	3.21091e-09	1527	1072	1328	244	196	494	31	39	27	26	24	32	13	7	27	503	268	110				CT486005.1	6.01846	0.882342	4.17426e-07	415	614	69	89	55	54	6	2	5	7	5	1	48	33	29	170	124	132	520	179	0
Syt14	-5.66257	0.832378	3.23733e-09	0	0	0	0	0	0	9	18	34	14	34	8	583	369	151	56	50	135				Fermt1	1.1374	0.198264	4.19822e-07	10350	10885	10237	10580	11709	11553	5744	5936	6262	3759	4136	4678	8828	7900	6167	12905	10023	9485	13066	12846	4729
Fzd3	4.62806	0.559921	3.28779e-09	576	546	665	716	995	916	20	44	43	19	21	9	23	29	23	5	22	31				Vwa5a	2.46234	0.436816	4.22269e-07	2866	2800	2642	1673	1456	2099	1307	1499	1553	532	532	602	1111	742	1414	3164	3167	3045	1848	3428	890
Reg3g	4.31438	0.596646	3.46177e-09	14955	13731	8911	3962	1630	2646	1297	1923	1990	2067	1887	2070	386	407	6090	0	11	3				Ahcy	-1.91628	0.330472	4.2856e-07	294	300	422	521	522	455	1372	1339	1094	1021	1129	1268	905	1166	870	1383	1269	1283	224	293	1284
Thbs1	5.30654	0.576981	3.48748e-09	27959	24592	37513	7888	35509	34654	128	178	600	192	278	211	6996	3484	1354	181	272	224				Slc3a1	-4.86676	0.702988	4.2856e-07	10	9	12	5	16	18	2610	2996	2578	7283	6146	6117	225	254	2235	420	261	186	19	31	2562
Kif1a	3.6486	0.498731	3.70316e-09	595	402	396	154	416	303	57	60	88	23	34	44	46	31	65	17	15	29				Epn2	1.49422	0.259303	4.31238e-07	2227	2273	2197	1966	2369	3413	624	711	812	505	586	669	1346	1259	983	1656	1236	1260	2041	2747	807
Col27a1	5.98812	0.653118	3.73663e-09	7877	6329	5762	1450	2064	1733	65	100	173	12	19	22	20	22	14	5	3	5				Upk3bl	4.1757	0.681143	4.35079e-07	63	42	48	37	33	30	8	21	6	9	12	5	21	12	43	49	27	29	529	141	11
Fkbp11	1.98928	0.294319	3.87069e-09	1236	1132	1086	1735	1381	1217	297	322	349	294	346	412	406	396	478	229	178	136				Btg2	1.83446	0.316573	4.38373e-07	9810	9900	8401	6583	9260	8723	2024	2144	2156	2083	2429	2422	2523	2176	2299	3589	3136	2420	9678	4766	2178
Prss32	-4.32017	0.540779	3.87069e-09	66	114	119	302	285	271	4219	3825	2780	5371	5585	5881	4984	5795	8230	14210	12732	11531				Eri3	1.21029	0.214805	4.49097e-07	2410	2256	1886	1503	1652	1890	1404	1356	1403	837	894	962	975	976	1181	1261	970	1021	1975	2436	1594
Dnaja4	4.0875	0.539715	3.87804e-09	403	385	223	204	278	341	41	35	35	11	10	7	47	47	49	23	31	11				Fanca	-2.00225	0.357071	4.63085e-07	404	517	655	829	969	830	933	872	836	910	1066	1205	1659	2193	817	1646	1283	1302	350	737	1083
Pdzd3	-5.77548	0.653776	3.98322e-09	5	1	1	0	1	0	414	453	292	604	539	598	20	38	255	177	188	140				Fgf9	3.62595	0.669158	4.63085e-07	363	378	318	136	211	310	52	76	83	17	12	3	0	1	3	4	34	13	278	500	53
Otop2	8.25339	0.766856	4.13672e-09	226	229	224	42	89	214	0	0	0	0	1	0	0	0	1	0	0	0				Gm43697	-6.13574	0.863911	4.74011e-07	0	1	0	0	0	0	152	123	87	179	189	162	78	69	155	0	1	0	0	0	154
Wars	1.52075	0.228805	4.27496e-09	13350	14863	11510	17152	19268	19641	4272	4638	4282	3786	4505	4679	8638	7990	6853	7071	5789	5429				Hspg2	2.52993	0.478633	4.74571e-07	8624	7058	11549	5032	8768	6478	4281	4346	4329	1067	1228	1674	352	983	2172	666	402	510	6536	9039	5336
Cd24a	2.72068	0.406466	4.28814e-09	37576	38106	46401	33320	34691	38288	15213	17588	20862	8344	8114	9679	6133	8405	16658	8370	5207	2807				P2rx2	-3.81735	0.723895	4.75184e-07	65	47	51	218	509	195	13	32	12	43	89	50	2445	1419	250	107	109	135	4	9	36
Ece1	1.4372	0.222246	4.54202e-09	5830	5615	4991	3074	5353	5467	3132	3185	3046	2365	2574	2845	2121	2342	3081	3767	3625	3892				Scly	-1.15847	0.203418	4.75184e-07	700	740	700	807	986	773	1174	1270	1192	844	926	1034	1016	1027	898	647	653	464	446	576	1169
Copz2	4.09789	0.558088	4.58469e-09	280	225	177	90	77	105	22	25	18	38	17	22	3	19	42	6	2	0				Arhgap22	2.69887	0.448545	4.77106e-07	630	515	495	387	509	493	71	107	42	66	60	66	202	68	107	45	27	28	560	629	100
Fam43a	2.78672	0.383821	4.59022e-09	945	1038	578	697	1245	1061	62	84	65	50	76	54	402	176	126	734	721	612				Chp2	-4.74802	0.689327	4.94778e-07	1	4	0	0	0	0	2444	2605	2624	4830	4549	4648	95	177	887	3621	2455	1396	21	19	1767
Polk	1.42523	0.216127	4.67452e-09	1813	1671	2200	1810	1864	1896	617	648	563	528	553	518	1410	1046	953	1207	952	761				Tst	2.34839	0.404358	4.95813e-07	1429	1783	1542	1683	1561	1418	403	549	328	651	571	700	335	452	423	3065	2663	2340	2497	2532	714
Tns4	2.64122	0.371987	4.71354e-09	22059	17348	34872	30402	45017	42553	3634	3616	3226	2703	3024	2632	13403	9224	7533	35419	26484	27993				Ctnnal1	-1.51927	0.264576	5.00036e-07	528	624	595	776	579	591	1642	1596	1479	946	1174	1098	2698	2654	2245	1878	1367	1451	424	593	1715
Medag	9.33777	0.762899	4.95099e-09	592	463	448	104	283	422	0	0	0	0	0	0	0	1	0	0	0	0				Fbxo2	4.14318	0.707034	5.02736e-07	428	395	491	113	134	165	12	1	0	8	7	6	3	5	16	2	3	3	92	210	15
S100a1	1.65012	0.250059	5.06313e-09	1436	1507	1578	1837	2118	1644	462	489	516	561	489	533	462	390	463	2633	2217	2024				Ppp2r2b	6.85413	0.91786	5.03072e-07	2434	2521	1969	510	890	1346	3	4	4	0	0	0	21	8	2	0	0	0	341	2141	1
Dhrs3	1.76824	0.271119	5.34933e-09	3292	3696	2717	3259	3290	4811	1723	1923	1835	1241	1360	1408	784	681	1136	1500	1532	1364				Aldh16a1	-1.36172	0.239124	5.13699e-07	1446	1477	1562	1460	1650	1495	3804	4227	3520	4761	4857	5415	2632	2941	2912	3649	3405	3462	1605	1809	4938
Itpr1	1.19536	0.18497	5.4092e-09	1803	1612	1956	1788	1896	2010	937	1056	1047	696	772	830	990	1057	1012	1287	1158	949				Lrrc26	1.92885	0.341963	5.13728e-07	962	1259	1087	620	729	818	1161	1422	1044	1215	1294	1123	973	807	1724	1462	1361	1437	1832	1425	895
Il1r1	4.66301	0.546119	5.48528e-09	543	625	346	281	439	776	2	12	11	6	6	5	77	55	13	93	107	103				Unc13d	1.91986	0.327029	5.15615e-07	1810	1705	1180	1574	1957	1510	449	587	380	404	571	351	2636	1600	1288	2267	1780	1896	2679	2010	520
Pomgnt2	1.32268	0.208567	5.52798e-09	528	414	357	331	362	394	442	392	422	258	277	292	164	226	362	365	305	299				Tldc2	-5.91869	0.844635	5.33515e-07	0	0	0	0	0	0	214	251	170	380	381	382	26	45	92	82	84	90	0	0	133
Defa22	-7.68453	0.846313	5.60416e-09	0	0	0	0	0	0	293	358	500	1030	814	822	175	382	3391	0	2	0				Slc50a1	1.30124	0.229243	5.33939e-07	2862	2746	2834	2782	2333	2534	1181	1101	1078	671	854	999	1362	1275	1071	1887	1420	1187	2617	3120	1404
Tmem65	-1.47295	0.226372	5.65155e-09	1233	1207	1213	1436	1426	1228	2657	3082	3015	3579	3306	3686	2009	2075	1903	2293	1885	2088				Gm12420	-1.80626	0.311873	5.52128e-07	175	148	219	181	189	168	510	568	584	518	562	571	522	581	653	395	400	408	119	74	609
Entpd3	3.2858	0.4226	5.88414e-09	1403	1206	1524	1591	2523	2584	66	61	69	31	41	38	949	516	147	75	71	46				Zfp9	2.52203	0.437557	5.55209e-07	336	256	217	274	212	167	25	17	26	23	27	21	24	29	53	10	10	6	84	158	30
Map9	3.98691	0.580313	6.18097e-09	205	126	154	37	59	50	22	40	36	12	9	10	7	11	36	17	51	59				Epb41l4aos	1.93512	0.350936	5.77554e-07	1006	865	594	640	479	512	970	1274	1182	457	578	558	507	530	1085	765	657	636	1623	1278	1087
Nox1	-6.66043	0.715981	6.28304e-09	3	2	0	0	1	2	78	111	125	526	565	523	1692	2079	2535	6393	4460	1509				Mex3c	-1.24017	0.222137	5.79803e-07	2148	2107	2237	2970	3166	2590	3398	3521	3689	4147	4762	4617	5624	4855	3461	5090	4251	4381	2313	2446	4059
St6gal1	4.14455	0.530462	6.28304e-09	1892	1373	2241	557	1584	1607	79	104	107	37	84	30	822	480	496	98	119	71				Gm20554	5.24519	0.904423	5.89308e-07	101	116	326	19	19	112	1	1	1	1	0	0	1	5	16	0	1	0	31	183	1
Zswim5	-4.73662	0.581885	6.35787e-09	3	11	11	55	32	27	796	709	804	868	838	938	364	494	589	557	448	442				Gm14328	3.30075	0.52414	5.97759e-07	373	529	432	257	276	216	68	95	68	128	98	116	30	40	36	26	36	32	4372	1688	175
Mansc1	1.86944	0.290702	6.49728e-09	1446	1517	1738	1624	1496	1547	1115	1069	1002	491	605	618	632	728	1141	1310	1348	1080				Brpf3	-1.24248	0.21752	6.03898e-07	1096	1252	909	643	799	910	4646	4422	4317	3733	4217	4544	3144	3477	4104	5380	4626	4262	1150	1089	4520
AC171111.1	-7.02368	0.731594	6.52768e-09	0	1	0	6	0	1	1195	1227	1637	216	225	292	118	159	148	3	7	5				Fzd3	4.00246	0.625823	6.04887e-07	576	546	665	716	995	916	20	44	43	19	21	9	23	29	23	5	22	31	464	638	8
Tmbim1	1.00093	0.155567	6.52768e-09	13246	12647	11375	9999	12228	11582	5073	5153	4908	4562	5076	5507	7632	6153	5531	11935	9051	7953				Ifi27l2b	-3.26311	0.530287	6.16801e-07	373	645	326	495	230	208	6138	6951	6317	11456	10535	9778	1773	2049	3674	5296	5692	4447	524	307	5000
Unc119	1.46496	0.228934	6.61103e-09	532	466	427	333	404	413	269	279	301	162	201	242	215	196	278	712	733	538				Klc3	2.60018	0.452194	6.18933e-07	1088	1017	764	547	996	908	113	183	138	74	99	51	347	249	286	189	131	113	518	726	109
Cndp1	-6.85828	0.819834	6.64284e-09	0	0	0	0	0	0	179	160	163	225	216	217	3	8	43	1	3	0				Myrf	1.68928	0.294108	6.30237e-07	17656	18527	16400	10733	14496	14235	7403	7039	6010	3883	4857	4730	5303	5545	4506	0	11	3	16863	15521	6503
Fsd1l	-3.13854	0.418378	6.65693e-09	69	87	18	50	44	35	1674	1513	1534	860	933	1023	467	716	1289	140	124	205				Aamdc	-1.70228	0.291954	6.33625e-07	241	258	222	243	213	213	844	1042	903	942	914	1069	350	420	816	531	721	779	119	162	837
Colgalt1	1.53114	0.234873	6.82325e-09	13837	12112	12366	8422	13756	14743	5075	5054	4693	3384	3674	4105	5390	5452	4536	6940	5852	5738				Bmp2k	-1.56052	0.273185	6.34831e-07	323	350	327	396	402	302	1245	1222	1180	1343	1339	1530	739	813	999	1168	1050	1372	392	357	1497
Col9a3	4.19975	0.526051	6.92391e-09	261	235	319	328	446	348	19	11	16	5	24	17	7	22	18	11	3	11				Tm4sf5	-3.19313	0.530353	6.35005e-07	177	174	62	163	127	99	7756	9145	7875	11488	11888	11612	1538	2246	3738	338	221	196	863	281	8494
Scg2	-6.01188	0.70038	6.99115e-09	0	1	1	0	0	2	476	571	688	212	151	212	45	89	308	62	35	20				Nek7	1.54606	0.271342	6.4035e-07	3697	3920	2814	2380	2630	2921	1202	1305	1274	904	923	1027	1395	1243	994	4210	3172	3115	5220	4181	1210
Ube2h	1.19556	0.186899	7.37073e-09	2776	2861	2524	2082	2775	2487	1446	1349	1249	1267	1355	1387	1560	1240	1691	2482	2134	2212				Cdkn1c	-2.47591	0.428257	6.44307e-07	106	169	229	211	346	285	122	120	111	130	183	136	138	109	75	691	427	401	112	155	559
Sh3pxd2b	1.21615	0.186439	7.43323e-09	4336	4434	4736	3814	5898	5392	1292	1328	1319	972	1210	1206	3475	3125	1716	3646	2799	2614				Retreg1	1.85504	0.329515	6.44307e-07	2096	2160	1885	1615	1688	1769	2832	2859	2805	1751	1550	1578	1114	805	1842	1661	1463	1083	2709	1866	948
Wwc2	1.50477	0.227079	7.67382e-09	3235	3393	3443	3099	3581	3649	710	909	744	587	637	611	1391	1534	649	1218	868	824				Arrdc1	1.14279	0.203246	6.58681e-07	4720	4866	4294	4120	4221	4005	2869	2898	2343	1702	2087	2147	3627	3076	2682	4115	3165	3016	5144	5837	2780
Gm37145	1.93663	0.288513	7.90658e-09	451	385	375	395	327	358	50	82	73	71	85	71	139	93	79	362	283	263				Fbp2	-1.87362	0.329137	6.73831e-07	1433	1649	1071	1905	1376	1088	5679	6386	5660	7360	7613	8782	4077	4325	4370	7349	6212	5905	2202	1633	7182
Fbxo32	2.72593	0.39758	7.97429e-09	1155	1124	846	580	882	1104	168	195	219	110	128	92	977	648	715	694	586	847				Egfl6	4.95191	0.747917	6.82028e-07	576	618	399	553	314	470	11	36	12	6	3	2	22	26	11	14	29	78	807	1460	5
Lama5	2.19499	0.318024	8.09413e-09	52503	45036	50005	28077	36590	39042	4146	5274	5267	4097	4776	4988	20281	14349	6539	25615	17733	16699				Nrg1	5.48882	0.686331	7.00378e-07	190	188	328	251	325	284	3	8	10	8	5	0	0	0	2	0	0	0	308	209	4
Lipt2	1.6077	0.24776	8.17568e-09	675	596	588	574	865	767	279	310	273	211	246	269	160	228	223	136	124	110				A930004D18Rik	3.20301	0.4941	7.02148e-07	136	179	172	105	211	194	5	9	0	6	5	4	43	38	10	57	44	31	214	222	7
Bco1	-6.22296	0.670179	8.26639e-09	13	11	10	14	25	14	363	435	319	4022	1840	3108	73	96	102	91	49	44				Tor3a	1.14215	0.204362	7.05489e-07	880	881	754	805	910	840	439	443	424	334	404	347	667	514	639	851	662	658	854	711	457
Cox10	-1.40087	0.219493	8.26639e-09	583	561	492	591	703	630	1122	1033	984	1035	1197	1446	845	1029	642	1171	1133	890				Defa26	-6.5803	0.894071	7.06635e-07	0	0	0	0	0	0	298	505	493	642	417	550	36	124	567	0	0	0	0	0	333
Cbarp	2.40496	0.362046	8.68166e-09	998	893	692	494	834	785	332	304	234	139	155	167	217	171	252	217	176	151				Marveld1	2.67333	0.496955	7.27192e-07	1925	1714	1562	1086	1071	1167	533	669	637	153	139	202	403	424	688	317	315	252	1042	1626	429
Sdf2	1.15097	0.180645	8.74578e-09	2326	2199	2048	2116	2445	2143	999	1267	1038	1130	1147	1144	1123	990	1243	1825	1671	1502				Pdrg1	1.82837	0.328141	7.29857e-07	1662	1521	1170	911	1166	1155	977	1003	1300	489	551	634	736	740	873	957	968	863	1239	1992	725
Ipmk	-1.33259	0.205969	9.01353e-09	1749	1918	1748	1801	1573	1551	4792	5574	4818	5315	5778	5837	4755	4664	6001	7682	6472	6143				Gm20275	-5.89103	0.858399	7.47742e-07	0	6	10	39	20	16	201	185	265	99	127	151	88	149	179	28	43	48	0	0	150
Shroom4	3.39978	0.47281	9.07696e-09	317	242	337	294	317	364	37	52	28	12	16	12	154	93	99	307	247	328				Nasp	-1.74877	0.31201	7.5398e-07	1685	1756	2352	2761	2912	2522	4113	4750	5075	3532	3724	4227	4947	7119	3614	4055	4045	3750	1554	2655	5138
Vstm2l	-5.65009	0.725479	9.14843e-09	0	1	1	1	0	0	42	49	26	63	63	69	39	52	47	50	37	17				Ccdc34	-1.54657	0.276432	7.59633e-07	696	746	973	1143	1027	923	1310	1474	1343	1303	1305	1464	1678	2345	1336	1778	1500	1379	578	982	1700
Smim24	-5.02006	0.549554	9.19332e-09	98	191	33	110	109	112	15456	15742	16334	23923	22087	24788	511	940	7919	1270	1046	1025				Dnaja4	3.38928	0.600958	7.75653e-07	403	385	223	204	278	341	41	35	35	11	10	7	47	47	49	23	31	11	105	74	14
Mep1b	-6.63889	0.660236	9.75533e-09	31	39	1	81	19	14	4443	6376	5032	12452	12153	10523	1291	2201	5111	5040	4441	3462				Tbx3	-5.7385	0.827433	7.79598e-07	0	1	1	0	0	2	1549	1444	1213	832	886	848	894	1035	1533	8	253	453	0	4	1076
Zfp248	2.505	0.370044	9.81938e-09	128	132	85	112	136	91	19	27	20	15	20	17	39	51	37	33	43	29				Trpt1	1.38037	0.252481	8.05251e-07	226	208	180	129	129	167	103	117	102	90	94	107	93	94	168	180	139	144	175	248	180
Pnpla1	-5.56672	0.780661	9.89791e-09	0	0	0	0	0	0	174	132	132	75	86	98	9	10	72	23	19	40				Lifr	5.8904	0.728746	8.09442e-07	827	828	1142	428	836	941	1	0	3	1	0	1	19	15	0	94	83	183	604	1181	1
Mmp15	2.11983	0.319318	1.01383e-08	12453	13278	12147	12867	15899	17420	2189	2755	2919	3456	3741	3326	6288	5420	6743	13029	13694	12747				Rcc1	-1.65455	0.300456	8.16726e-07	1061	1145	1320	2048	2477	1773	2282	2239	2300	2191	2552	2883	3647	4327	2203	2922	2427	2374	1394	1656	2778
Pter	-1.0174	0.160203	1.02943e-08	497	534	459	461	432	432	1131	1155	1021	965	965	1061	434	498	456	648	476	419				Ccl9	-4.18725	0.671168	8.44461e-07	13	25	72	154	125	115	1088	918	951	672	840	837	285	735	685	131	153	181	33	51	1005
Tmem231	3.03523	0.437132	1.09394e-08	583	566	500	474	472	535	99	126	96	44	31	56	146	86	111	128	148	108				Nr3c2	-2.54496	0.427053	8.44461e-07	173	174	163	111	85	104	567	620	727	938	995	1029	821	740	1365	2705	2381	2485	69	105	972
Fbp1	-5.41317	0.591276	1.09652e-08	13	29	5	2	12	5	1684	1997	1671	2696	2541	2503	50	77	384	1	4	0				Smbd1	-5.4363	0.764987	8.44461e-07	2	0	3	0	2	0	91	81	54	46	75	73	6	9	6	11	12	31	1	1	105
Zfp385b	3.51202	0.556173	1.10459e-08	61	98	38	16	19	23	41	34	28	5	6	11	1	0	6	7	9	9				Vwce	-5.87732	0.849103	8.83515e-07	3	4	7	3	6	5	460	535	397	1496	1602	1868	3	34	46	0	0	1	0	3	553
Snx10	1.10679	0.174142	1.10954e-08	1908	1960	1867	2237	2162	2063	941	1088	982	727	721	882	1382	1268	1119	1192	1049	1096				H2-DMb1	3.70676	0.70238	8.91267e-07	230	157	194	121	118	126	10	14	9	6	2	3	22	21	55	18	22	85	62	31	11
Uggt2	2.95853	0.442901	1.21217e-08	336	324	269	262	270	233	115	117	86	34	41	52	28	28	51	120	145	62				Pamr1	4.15839	0.901292	9.66006e-07	1039	691	408	9	52	92	14	8	3	0	0	1	1	1	28	1	1	0	19	251	8
Tnfsf13b	-3.92043	0.528208	1.2259e-08	10	11	7	2	7	5	101	149	132	167	168	171	156	194	178	157	399	434				Hpd	-5.89307	0.811341	1.00069e-06	2	0	0	0	0	0	757	762	879	206	185	280	122	154	814	67	114	77	0	0	580
Kcnh2	2.03911	0.321906	1.23783e-08	365	313	204	178	174	167	137	134	128	126	136	118	109	169	293	37	35	34				Abca5	2.83824	0.51632	1.00663e-06	1279	1076	1406	728	802	926	63	131	140	50	49	60	56	37	75	46	55	40	311	1383	240
Ccrl2	3.55376	0.512846	1.2428e-08	165	167	149	61	87	123	21	37	33	18	6	12	30	16	48	40	39	32				Arhgap19	-1.77238	0.321324	1.00663e-06	424	384	570	846	744	617	1064	1018	954	927	1028	1165	1387	1782	936	964	771	876	509	685	1479
Id2	2.23139	0.334249	1.25214e-08	3985	3920	3562	2495	2923	3534	619	792	606	654	836	798	1169	1317	1164	472	423	197				Scara3	6.16503	0.942188	1.01044e-06	20043	17189	11511	3493	9672	16487	47	78	63	0	5	6	102	100	59	25	11	1	2623	6742	2
Capsl	4.32812	0.573542	1.25734e-08	342	311	320	169	399	374	21	35	42	12	4	5	36	42	45	18	27	16				Slc25a30	1.16428	0.207292	1.0164e-06	1342	1233	1455	1264	1210	1316	322	331	309	286	349	357	784	711	377	779	564	514	985	1188	341
Eva1c	4.11126	0.501819	1.29752e-08	1051	933	1143	930	1332	1432	6	22	5	33	32	9	207	146	45	313	203	176				Slco2b1	-5.28973	0.745005	1.04011e-06	0	1	0	3	0	0	2077	1897	1703	2296	2447	2972	7	18	155	7	23	30	1	4	1260
Rell1	1.45007	0.22564	1.29752e-08	2887	2878	3347	3902	4170	3939	954	1143	1047	1066	1091	1027	2079	1828	1710	3959	3628	3439				Hsd3b2	-5.38291	0.786189	1.04929e-06	0	0	0	0	0	0	15	25	12	9	20	8	22	24	11	215	243	402	1	1	101
Galnt4	1.58897	0.252428	1.29759e-08	8034	9290	7781	7646	5187	6111	4473	4943	5431	3204	3278	3616	4118	4064	5729	5113	5412	5591				Defa34	-6.7999	0.903359	1.06721e-06	0	0	0	0	0	0	426	493	839	899	639	775	59	146	1610	0	1	0	0	0	581
B630019K06Rik	3.11694	0.459606	1.32533e-08	88	110	86	82	95	88	25	38	29	11	18	16	14	9	28	8	26	23				Elk3	2.09092	0.352159	1.08656e-06	1628	1623	1819	1883	2968	2777	61	88	72	115	173	94	1606	1022	471	1503	1193	1287	1290	1530	76
Il18r1	3.29346	0.424107	1.32533e-08	1277	1302	1209	1281	1875	1487	39	32	45	23	29	21	459	151	46	253	139	106				Il17rb	-3.26605	0.550167	1.11832e-06	35	16	34	13	18	15	191	193	141	224	209	214	113	94	222	123	93	63	5	9	127
Tceal8	5.23646	0.646998	1.3495e-08	722	671	297	119	119	64	11	26	12	13	7	6	25	25	46	1	5	1				Slc2a5	-5.19476	0.785497	1.14517e-06	52	42	38	22	59	21	1054	1257	870	5860	4508	5520	26	47	134	15	29	49	10	6	641
Fer1l4	5.20801	0.591193	1.36157e-08	6545	7487	4093	3240	3450	4026	25	32	13	80	125	90	248	205	129	926	1043	734				Ehd2	1.90201	0.324114	1.17932e-06	1076	1046	893	1455	2172	1696	114	152	142	126	171	117	1606	1194	500	853	593	556	1759	1216	116
Txnrd2	-1.67259	0.263088	1.38251e-08	254	326	290	371	324	326	674	791	619	792	786	962	757	1017	633	498	467	449				Ghr	1.74224	0.330571	1.17932e-06	1854	1571	1750	1017	1414	1500	1875	1870	2125	1400	1008	1243	89	201	686	344	261	283	2346	3440	2495
Ablim1	1.69032	0.255636	1.39198e-08	10940	11249	12166	13712	16556	14284	1555	1691	1482	2416	2136	2200	5072	4544	2399	17189	13111	11768				Lama5	2.09261	0.363308	1.20668e-06	52503	45036	50005	28077	36590	39042	4146	5274	5267	4097	4776	4988	20281	14349	6539	25615	17733	16699	35680	55492	8041
Eda2r	3.34265	0.465423	1.43165e-08	1783	1461	2647	1707	2127	2558	133	202	324	88	110	156	894	624	589	1196	1114	619				Car11	3.97902	0.738697	1.22409e-06	155	186	109	50	44	87	18	8	6	3	4	1	4	3	8	1	6	4	60	267	11
Mfsd12	1.38855	0.220161	1.48762e-08	1067	1133	1313	986	1219	1181	519	608	553	558	585	656	300	309	430	514	502	453				Slc2a12	6.03072	0.869075	1.2536e-06	151	228	97	80	16	24	2	5	1	1	0	1	0	2	0	0	2	0	305	361	0
Ifi27l2b	-3.67677	0.4828	1.51827e-08	373	645	326	495	230	208	6138	6951	6317	11456	10535	9778	1773	2049	3674	5296	5692	4447				Gstm2	2.2484	0.410914	1.256e-06	1790	2013	1449	904	767	840	627	514	432	211	315	371	121	145	188	222	226	154	1979	2417	855
Galntl6	3.04568	0.444304	1.53168e-08	232	345	191	482	311	187	57	60	44	34	34	44	67	73	104	97	70	88				Stx19	4.69857	0.670395	1.25833e-06	188	205	90	220	280	199	1	0	10	1	3	1	7	8	6	10	14	5	485	228	4
Foxa2	2.61321	0.399343	1.58783e-08	2223	2309	1662	1476	1956	1760	566	631	758	350	360	394	189	368	377	799	571	268				Crtap	1.18908	0.218265	1.27058e-06	1024	963	998	966	1199	1136	294	326	324	228	224	261	341	441	395	413	376	402	828	1183	659
Stra6	8.49808	0.749505	1.60403e-08	1493	1159	5606	3114	5516	10520	0	4	2	0	0	1	502	221	60	326	156	26				Nup133	-1.12287	0.204878	1.27208e-06	1430	1408	1683	1742	1974	1674	2600	2667	2442	1868	2121	2342	2594	3338	2164	2486	2231	2258	1332	1806	2938
Runx1	1.78524	0.273572	1.63054e-08	2471	2811	2627	2356	2719	2579	699	769	516	416	497	429	1350	1080	712	1796	1367	1504				Pla2g1b	4.24292	0.865801	1.31883e-06	68	59	25	7	4	11	19	4	13	0	0	4	0	1	1	0	1	1	75	102	3
Twsg1	1.36114	0.216034	1.64399e-08	3488	3531	3769	3240	4269	4366	1995	2123	1991	1415	1355	1510	1304	1493	1417	1817	1736	1677				Gsdmc2	4.7942	0.994309	1.32535e-06	4	34	1	0	0	0	4	1	4	5	4	8	1	19	257	10144	21869	22346	589	2239	29
Eps8l1	3.03329	0.441205	1.65165e-08	2091	2430	1467	1140	1577	1410	330	327	360	139	151	158	694	397	522	547	354	420				Asph	1.40084	0.258364	1.35971e-06	8514	8568	9102	5658	4976	5564	4581	4745	4455	3027	3316	3385	3353	3693	4571	3193	2965	2795	6377	8986	4195
Rrp12	-1.28069	0.206013	1.77456e-08	659	674	633	564	747	617	1090	1160	1191	884	1111	1222	1312	1880	875	1115	934	910				Ptafr	-5.60692	0.931875	1.41988e-06	0	1	0	1	0	1	14	17	11	84	78	72	0	0	0	0	0	1	0	0	23
Hoxa3	-5.58674	0.735932	1.82241e-08	1	0	0	1	0	0	67	67	39	87	81	138	44	122	173	849	738	618				Exosc8	-1.27751	0.235152	1.47493e-06	775	817	897	988	915	749	1349	1366	1311	1086	1126	1296	1638	2198	1095	1170	1030	1092	651	1057	1583
Sema6d	-5.19753	0.579852	1.86648e-08	23	12	8	2	8	3	1270	1060	935	1705	1819	1924	147	434	1520	1217	1325	1818				Ccdc114	3.42156	0.594116	1.52101e-06	237	275	179	83	138	157	392	468	337	150	192	188	13	10	10	126	60	106	157	147	47
Ulk2	1.10684	0.179304	1.86684e-08	1025	1069	934	823	882	968	775	789	938	545	596	579	590	605	819	1030	943	957				Rdh16f2	-6.28108	0.90042	1.52101e-06	1	0	0	0	0	0	24	37	36	31	23	41	0	0	0	4	1	1	0	0	65
Fam20a	-5.48937	0.66414	1.87599e-08	1	2	1	3	2	0	524	571	532	150	122	167	149	170	470	0	0	0				Defa-ps1	-6.40648	0.90135	1.52543e-06	0	0	0	0	0	0	160	486	885	818	567	709	49	119	516	0	1	1	0	0	422
Rsu1	1.41939	0.225243	1.9078e-08	1458	1480	1177	1183	1594	1452	695	607	581	447	499	566	938	765	894	1264	1064	758				C530008M17Rik	-5.16623	0.765045	1.52969e-06	6	14	6	1	0	3	500	588	761	1396	1241	1319	163	206	574	1092	790	429	1	2	413
Samd4	2.96747	0.405889	1.94089e-08	638	586	657	668	827	925	28	30	41	22	45	31	295	99	66	37	24	45				Atp8a1	1.12141	0.210753	1.53366e-06	3798	3540	3106	1910	2696	3115	2928	3090	2726	1848	1957	2275	1204	1169	2225	4862	4946	5374	2815	3652	3799
Fam216a	1.88115	0.292324	2.00221e-08	573	503	623	510	620	631	172	229	207	115	137	114	227	254	200	244	236	226				Stk32b	3.33567	0.799796	1.5353e-06	255	226	68	11	40	11	78	95	30	9	10	7	2	0	21	0	1	2	46	71	19
Sept8	1.07776	0.172406	2.0245e-08	4706	4685	4056	3705	3909	3341	1799	1791	1727	1530	1827	1749	4414	3835	3286	4235	3450	3163				Skp2	-1.97393	0.361328	1.55057e-06	283	315	468	534	639	570	965	895	967	733	729	915	765	1121	535	624	524	436	260	440	991
Fmnl2	1.50923	0.233533	2.04225e-08	4027	3960	5667	5229	4821	4694	810	978	1150	842	942	863	2360	1920	1070	3391	2412	2492				Tmem71	3.09742	0.516462	1.56359e-06	107	141	184	187	95	175	51	56	50	41	36	40	131	54	62	63	37	66	140	347	19
Trib2	4.66244	0.618263	2.05959e-08	216	202	262	174	283	333	38	32	23	1	6	4	17	16	50	7	9	5				Slfn2	3.54626	0.578002	1.57639e-06	398	466	343	238	405	628	79	72	71	64	73	61	228	115	98	13	22	75	1247	2325	117
Fuz	2.82021	0.44094	2.0817e-08	1172	1116	854	743	678	686	451	510	318	139	151	149	165	222	328	233	240	281				Stx11	2.65016	0.429047	1.57639e-06	467	373	517	759	869	705	3	9	14	22	11	18	85	88	30	25	15	11	462	531	29
Rnf32	-2.94691	0.416364	2.08839e-08	95	88	44	59	35	50	971	1004	1142	540	482	638	674	970	773	817	905	658				Arg2	-3.7693	0.583073	1.58374e-06	92	79	61	42	26	42	2295	2579	2069	3649	3453	3940	9	13	39	87	135	127	26	48	901
Defa21	-7.40073	0.846766	2.08913e-08	0	0	0	0	0	0	225	333	471	827	608	685	93	247	2235	0	0	1				Eml5	2.94733	0.502324	1.5995e-06	375	390	266	196	288	255	29	27	43	16	23	21	54	56	30	12	20	11	138	426	28
AI427809	-5.76587	0.782831	2.11413e-08	0	0	0	0	1	0	278	258	175	118	92	87	28	57	193	9	16	31				Nlrx1	2.25587	0.403722	1.5995e-06	203	191	177	126	165	211	78	108	72	63	68	100	285	241	169	414	422	308	168	238	63
Slc48a1	1.81565	0.284839	2.12397e-08	2674	2613	1988	2490	1984	1807	948	918	897	498	551	649	817	848	720	1006	950	846				Ociad2	1.17911	0.217541	1.62442e-06	7797	7475	6910	6811	6224	6932	4956	5328	4558	3466	3561	3983	2140	1932	2304	2602	3265	3741	6304	7841	4067
Wdr45	1.89692	0.296563	2.18018e-08	1404	1403	1035	917	1139	1136	419	519	470	268	265	299	394	325	331	466	403	337				Mgmt	2.23366	0.415061	1.62548e-06	859	670	572	361	483	609	159	213	229	120	103	100	184	148	172	215	197	176	494	524	230
Map3k12	2.23454	0.351747	2.19592e-08	291	314	217	143	213	237	129	110	108	99	87	96	49	27	90	96	92	62				Fam69b	1.3672	0.252123	1.6343e-06	249	201	186	205	216	215	120	161	110	89	109	95	188	173	184	409	407	381	185	275	118
Pde1b	-4.48288	0.584192	2.20893e-08	2	1	1	0	1	5	397	433	344	126	156	167	30	61	221	14	25	31				H2afv	-1.20552	0.21668	1.6343e-06	1029	1032	1082	1046	1114	1119	3200	3617	3240	2223	2355	2643	1336	1771	2637	1461	1333	1019	612	1120	3673
Maged1	1.80455	0.283558	2.21671e-08	10114	9249	8822	7596	8824	9220	3754	3910	3600	1915	2077	2408	3755	4209	3308	3535	3365	3098				Neto2	-2.37056	0.43277	1.6343e-06	211	184	161	222	350	258	182	181	244	286	283	314	658	671	346	935	1288	2092	108	109	236
Ggcx	1.8148	0.285192	2.35574e-08	1098	1174	981	1072	1164	1004	486	484	447	219	271	307	314	318	301	266	241	215				Liph	1.59436	0.291333	1.66095e-06	3914	4774	2999	3295	2573	2926	1463	1504	1527	1686	1683	1550	1609	1407	1944	2331	1938	1517	4377	5553	1735
Tfcp2	1.65224	0.268445	2.39663e-08	781	767	614	416	595	639	537	508	416	280	307	325	237	349	456	609	466	499				Nfatc2	1.39428	0.253639	1.66423e-06	1261	1297	1242	1101	1611	1510	288	330	288	191	228	226	517	539	348	717	460	495	978	1269	340
Itln1	-5.26114	0.591347	2.4126e-08	144	67	218	212	363	625	36338	42389	57892	36339	30856	33525	4824	12515	34045	374	472	449				Tnfrsf21	2.53817	0.451544	1.67938e-06	5912	6898	3323	2724	3081	2753	797	916	688	580	722	587	1855	1493	1246	3414	2996	2908	8735	3982	1229
Slc2a2	-9.7279	0.817669	2.4126e-08	0	0	0	2	0	1	1574	2086	2220	10847	8681	9980	8	13	107	0	1	1				Defa37	-6.37237	0.882395	1.71219e-06	0	0	0	0	0	0	539	655	911	891	653	764	59	155	1484	0	1	2	0	0	439
Galnt7	1.47284	0.237818	2.43242e-08	11214	12684	10482	12471	10241	8881	5958	6501	5659	6351	6386	6527	5127	5199	8813	8705	8564	8363				Syde2	-1.79433	0.316553	1.72812e-06	277	315	398	376	279	279	2462	2424	2495	1229	1371	1633	544	821	1147	412	297	263	362	525	2621
Oprd1	3.8647	0.55144	2.46192e-08	43	49	41	62	32	47	4	6	5	5	3	1	8	17	18	8	12	5				Gm2061	-5.8863	0.847495	1.74925e-06	0	0	0	0	2	0	520	667	490	1131	753	884	204	183	1367	84	153	366	0	0	564
Gm5485	-7.48542	0.819019	2.50601e-08	0	0	0	0	0	0	103	197	131	801	691	589	178	189	1241	936	1491	909				Ephx1	2.05423	0.367297	1.76301e-06	12936	11708	13506	13342	11335	12208	4615	5068	5363	6765	6336	6791	4846	3154	4488	4758	4302	3774	15493	10447	4496
Bcat2	1.48351	0.2331	2.64524e-08	4844	5600	4037	4021	3947	3934	1237	1329	1089	977	1039	1180	2038	2152	1141	1983	1516	1306				Pag1	1.09895	0.201312	1.76301e-06	865	932	736	762	643	720	1131	1279	1167	914	1054	1046	1237	1214	1027	1309	903	873	1877	2778	1118
Hgfac	2.63175	0.3938	2.65617e-08	11010	11918	13570	12445	10649	11595	1449	1933	1146	2299	2347	2021	2893	1741	3042	15395	13309	10349				Marcksl1	-1.98741	0.369309	1.79765e-06	1681	1394	1423	1172	3342	2324	983	992	842	727	923	908	2759	2975	1096	1266	1077	973	637	821	1103
Robo1	8.23208	0.595519	2.71644e-08	1288	1100	2386	1084	1668	2028	3	7	2	0	1	2	0	2	0	1	0	1				Mypop	1.8907	0.346809	1.80789e-06	291	253	204	194	260	249	42	41	45	43	68	62	57	71	89	226	191	178	187	171	53
Ush1g	9.21852	0.694427	2.77439e-08	1088	952	1533	262	510	1435	1	2	1	0	0	0	0	0	0	0	0	0				Tns4	2.22733	0.394866	1.81375e-06	22059	17348	34872	30402	45017	42553	3634	3616	3226	2703	3024	2632	13403	9224	7533	35419	26484	27993	11276	13540	1945
Hrct1	5.08104	0.619598	2.85285e-08	156	159	94	112	85	81	5	5	2	1	1	0	14	3	5	13	16	16				Dnal1	2.94998	0.548713	1.81725e-06	537	464	359	217	292	315	75	71	84	23	20	20	38	29	46	78	64	28	184	308	57
Layn	6.62976	0.814107	2.88128e-08	83	46	51	23	20	37	0	0	1	0	0	0	3	3	4	0	0	0				Krt15	3.61103	0.560471	1.83137e-06	66	73	39	92	139	102	30	65	62	43	63	70	94	98	58	104	77	78	3922	740	96
Slc50a1	1.39833	0.22353	2.91405e-08	2862	2746	2834	2782	2333	2534	1181	1101	1078	671	854	999	1362	1275	1071	1887	1420	1187				Lrpap1	2.06986	0.385746	1.87948e-06	5177	5311	4121	2535	2755	4017	1699	1925	1992	779	906	1057	1108	1321	1241	1287	1332	1217	2958	5499	1658
Cd200r3	5.65422	0.787418	2.94041e-08	69	69	62	61	175	147	0	1	0	0	0	0	138	58	29	27	18	26				Hjurp	-1.29456	0.237291	1.88304e-06	4078	4045	5411	4646	4306	4791	12171	11138	10291	7322	8614	9965	7438	10537	7584	7709	6495	6818	2597	3078	7923
Ttc7b	-1.95636	0.308282	2.94041e-08	37	42	32	49	74	60	175	179	217	143	150	149	253	212	198	313	269	249				Trim40	-3.72427	0.62969	1.94357e-06	15	26	25	18	6	15	350	329	213	754	907	760	780	425	787	1223	1244	1318	19	27	556
Gm9917	-2.83209	0.425476	2.97456e-08	18	28	17	31	55	25	129	150	114	161	201	198	210	144	159	687	688	567				Gm49417	3.8436	0.73631	1.99247e-06	167	155	110	51	69	96	31	16	24	1	1	2	3	12	13	3	2	2	87	170	14
Tigit	6.52863	0.638692	2.98963e-08	1559	1071	1761	723	1204	1348	0	0	1	5	6	1	91	34	5	11	4	10				Ampd3	1.47909	0.284382	1.99249e-06	1226	1259	1525	1301	1376	1338	1121	1184	951	652	628	626	594	500	1761	1366	1209	1179	853	1198	1220
Trim40	-4.63653	0.581889	3.00775e-08	15	26	25	18	6	15	350	329	213	754	907	760	780	425	787	1223	1244	1318				Sgsm2	1.40593	0.262422	1.99656e-06	2198	2291	1634	1374	1829	1910	1372	1358	1233	722	789	816	1063	983	1178	1726	1314	1198	2057	2412	1337
Usp43	-1.3728	0.224412	3.05095e-08	923	941	1044	1261	1492	1376	1684	1915	1756	1702	1904	2161	2792	3345	1810	2934	2435	2561				Dapk2	-1.9153	0.351722	2.0171e-06	459	571	608	1128	1046	856	1951	2069	1800	1593	1646	1845	1792	2125	1532	4767	3761	3631	747	637	1771
Phf21b	-1.83773	0.29261	3.15907e-08	146	170	221	244	155	176	621	625	586	406	470	489	815	890	537	930	858	692				Gm16136	1.85787	0.339819	2.02273e-06	241	259	281	184	206	240	122	146	138	64	58	103	113	124	101	182	147	118	337	486	132
Gm12420	-1.33377	0.213787	3.22885e-08	175	148	219	181	189	168	510	568	584	518	562	571	522	581	653	395	400	408				Gm4737	-1.77254	0.323809	2.02273e-06	396	444	605	736	873	674	1788	1787	1602	1341	1585	1920	1250	1684	1359	2013	1941	1917	657	795	2195
Dclk1	3.36158	0.5831	3.24343e-08	1151	852	2189	314	691	666	1108	1137	1455	276	191	235	72	154	1387	8	9	21				Fat2	4.57291	0.714547	2.03458e-06	25	36	21	40	89	63	9	2	4	0	1	1	54	42	42	20	13	22	501	165	5
Gm7208	-5.96259	0.772728	3.2653e-08	0	0	0	1	0	0	412	422	385	253	280	220	6	10	119	4	27	10				Fndc10	2.33375	0.421255	2.03458e-06	2781	2537	2208	1045	1623	1976	706	700	571	452	435	394	898	624	488	529	493	506	2029	2364	613
Itga9	5.02762	0.654489	3.28382e-08	614	416	831	299	886	867	46	53	75	3	14	10	3	5	21	1	7	21				Hmgcll1	2.69976	0.456393	2.04705e-06	350	274	318	446	532	371	0	0	0	8	3	10	440	313	89	1529	1193	1479	386	224	14
Gm13991	1.37367	0.223922	3.31927e-08	534	566	468	353	432	379	261	288	312	211	224	266	242	189	294	405	336	314				Celf4	3.61629	0.614651	2.04706e-06	605	518	346	200	168	226	47	55	14	26	30	19	46	21	23	20	16	9	531	534	46
Oat	-1.61123	0.244036	3.32778e-08	5633	5257	6838	4682	4524	5458	73939	83697	92073	65431	57462	73226	7227	13736	46899	3676	3653	3572				Rimbp2	-5.78166	0.832313	2.05926e-06	3	0	0	0	2	0	238	204	380	90	85	118	46	97	227	30	40	22	0	0	288
4930539E08Rik	-4.83034	0.584189	3.43799e-08	14	16	3	0	1	1	561	632	701	359	451	299	543	347	1052	478	416	341				Etv1	2.4866	0.506451	2.12732e-06	78	91	95	64	23	41	44	66	87	28	28	34	9	33	78	7	8	6	126	113	120
Asz1	7.93167	0.773215	3.49948e-08	1385	769	930	385	725	493	0	2	7	0	0	0	5	0	9	0	0	0				Nefm	-3.98223	0.636444	2.14696e-06	13	10	14	16	6	6	150	161	175	57	60	71	31	48	59	18	33	19	1	7	239
Cd63	1.02998	0.168945	3.51488e-08	1625	1646	1317	1334	1817	1655	887	1007	1092	806	863	983	787	991	998	1585	1522	1477				Smpd1	1.38476	0.25983	2.14916e-06	1425	1274	1247	809	1116	1110	427	487	399	273	298	301	379	355	419	616	480	675	676	965	446
Tecpr2	1.00979	0.16537	3.61185e-08	1149	994	1222	1011	1090	1060	623	626	716	548	632	585	592	614	663	756	599	576				Lypd3	5.50009	0.789949	2.15679e-06	214	156	116	98	116	90	1	0	3	4	1	7	16	4	8	1	3	3	531	96	2
Loxl1	7.24837	0.755742	3.70792e-08	147	123	63	31	37	69	1	1	0	0	0	0	0	0	0	0	0	0				Ddx39	-1.48601	0.284025	2.17286e-06	1460	1498	1680	2510	3169	2064	2680	2857	2711	3170	3463	3921	5258	6867	2691	3439	2864	2949	2712	2560	3061
Tent5b	2.72384	0.383038	3.73051e-08	999	943	894	702	908	778	49	66	41	36	54	33	244	141	45	449	251	228				Bco1	-4.68998	0.805974	2.18915e-06	13	11	10	14	25	14	363	435	319	4022	1840	3108	73	96	102	91	49	44	8	12	982
Tmem40	3.48708	0.46892	3.75562e-08	718	624	395	476	631	522	8	20	9	32	29	23	267	137	77	67	61	36				Lgmn	1.38549	0.260966	2.19394e-06	6993	5883	5503	4408	3921	4175	1488	1792	1659	1497	1525	1658	1217	1194	1625	1709	1650	2031	2740	4512	2387
Fkbp9	2.66625	0.39703	3.91207e-08	5120	4657	4426	3939	4436	4353	766	871	740	314	447	408	829	707	462	1869	1559	924				Siah1b	-1.59607	0.301239	2.21568e-06	94	123	120	167	177	187	225	209	217	191	222	234	345	480	193	231	194	195	128	208	276
Rars	-1.31963	0.217065	3.92317e-08	3495	3529	3726	4657	4706	4408	5666	5808	6002	6568	7327	7992	11182	10920	7237	7148	6824	6734				Pycrl	-1.13256	0.207175	2.21915e-06	639	633	543	529	724	572	2610	2622	2506	1515	1700	2131	605	978	1102	1107	1014	847	658	767	2863
Gm19557	5.08936	0.639122	4.09445e-08	116	157	111	92	85	72	0	0	2	0	3	4	16	15	6	11	13	13				Zfp93	1.4367	0.27216	2.2606e-06	298	278	270	235	293	299	250	237	230	126	137	158	110	110	253	245	215	217	258	305	169
Dtx3	3.05361	0.454812	4.28121e-08	2229	1933	1349	905	932	1094	269	276	291	109	133	144	619	502	437	226	239	203				Sptbn2	3.07564	0.581591	2.27804e-06	2004	2071	2185	847	1527	1527	284	292	245	65	80	88	322	450	405	205	246	74	2119	1951	281
Pipox	-4.99595	0.568573	4.29834e-08	8	7	19	1	1	1	2231	2271	2061	960	714	809	46	104	395	21	43	28				Adgrg1	1.82605	0.334394	2.29653e-06	9540	9408	9691	6053	7869	7678	2919	2927	3053	1455	1742	2065	2122	2691	1669	3591	2857	2642	8964	8021	1988
Epn2	1.61862	0.258053	4.54542e-08	2227	2273	2197	1966	2369	3413	624	711	812	505	586	669	1346	1259	983	1656	1236	1260				Fam117b	-1.59707	0.294508	2.33177e-06	1417	1305	1564	1375	1446	1382	3226	3158	3054	4042	4241	4830	3436	4293	3737	4350	4434	5364	1140	1541	3431
Il22ra1	-2.11128	0.332431	4.62573e-08	372	409	293	205	202	313	1036	1000	1108	1136	1334	1370	1518	1561	1127	1098	804	824				Piga	-1.44579	0.265531	2.35096e-06	895	847	1051	829	769	712	1191	1147	952	1252	1312	1293	1011	885	950	2012	1806	1391	438	559	1632
Palmd	6.38474	0.629752	4.65416e-08	1589	1277	1010	1297	3853	2077	0	4	0	8	14	5	42	27	12	7	2	0				Ano1	1.78685	0.315992	2.42146e-06	11349	11268	10859	11160	14924	13645	1567	1791	1172	1944	2745	2274	13258	13271	6587	8685	5346	4868	8224	13357	1172
Cyp26b1	5.45124	0.675189	4.72918e-08	144	148	354	443	345	567	4	15	2	7	12	10	88	51	414	17	151	152				Fabp1	-6.60186	0.958888	2.42566e-06	0	0	0	2	0	0	14326	15846	10505	95187	81495	94768	6	61	97	0	9	2	22	26	20151
D130043K22Rik	-7.58948	0.796539	4.73563e-08	0	0	0	0	2	0	89	128	87	777	640	665	12	17	40	367	373	364				Pcsk1	-3.34714	0.532463	2.4357e-06	27	17	14	8	3	8	816	951	1263	351	301	399	152	183	1798	37	34	51	2	12	1030
Bcas3	1.04301	0.172752	4.76874e-08	1093	1115	840	715	1029	945	703	644	640	506	557	566	647	682	765	958	814	786				Padi1	4.54184	0.808861	2.44331e-06	89	106	78	9	15	51	6	6	4	1	0	2	1	1	11	1	2	0	253	54	4
Tpst1	1.4153	0.225931	4.81726e-08	745	658	708	818	974	870	187	218	254	153	181	195	376	381	220	281	267	248				Ccne2	-1.96932	0.374253	2.45884e-06	129	177	224	301	353	278	484	499	647	483	483	577	583	929	331	846	734	712	191	269	427
Mterf2	-1.81084	0.284425	4.90463e-08	94	71	58	89	93	93	382	488	399	437	411	482	158	161	262	244	241	226				Ceacam20	-5.58517	0.900212	2.46302e-06	0	0	2	2	0	0	353	310	263	2903	2490	2426	354	241	1054	3278	3317	3135	1	2	1047
Rhpn1	4.69022	0.567029	4.90463e-08	275	194	193	96	199	299	5	6	3	4	10	4	12	7	7	8	8	9				Sct	-6.05918	0.884025	2.49954e-06	0	0	6	0	0	0	56	38	53	75	72	89	43	90	177	13	3	16	0	0	283
Defa31	-7.41627	0.854794	4.9411e-08	0	0	0	0	0	0	171	196	221	563	395	457	20	31	234	0	0	0				9030622O22Rik	3.42389	0.665276	2.50817e-06	312	416	186	80	172	156	70	58	53	13	7	18	6	14	39	17	15	1	143	248	31
Nav1	1.71338	0.280448	5.10152e-08	1741	1734	1655	1248	1852	1888	1077	983	1099	680	700	908	337	462	679	311	211	145				Sipa1l2	-1.18365	0.222864	2.52748e-06	674	888	572	830	765	748	1363	1395	1492	1279	1378	1619	1317	1338	938	763	611	560	826	589	1349
Cyp1a1	-6.28583	0.773223	5.18622e-08	1	0	0	0	1	1	24	28	16	187	120	152	141	201	95	242	222	144				Gm36426	-4.22798	0.730865	2.53511e-06	0	4	6	5	15	8	10	16	19	16	25	26	36	48	25	12	7	9	0	5	25
Hsd3b2	-5.12643	0.827015	5.30075e-08	0	0	0	0	0	0	15	25	12	9	20	8	22	24	11	215	243	402				Sdf2	1.00326	0.188105	2.5389e-06	2326	2199	2048	2116	2445	2143	999	1267	1038	1130	1147	1144	1123	990	1243	1825	1671	1502	2153	1927	1065
Car11	4.81331	0.61661	5.31655e-08	155	186	109	50	44	87	18	8	6	3	4	1	4	3	8	1	6	4				Vac14	-1.01499	0.191755	2.5389e-06	1318	1244	1388	1423	1795	1527	1819	1648	1685	1830	2029	2260	2141	2450	1614	2397	2083	2169	1623	1460	2069
Fndc4	3.41145	0.508819	5.366e-08	149	134	122	89	65	109	29	26	12	9	11	18	10	30	24	6	15	7				AY761184	-6.76334	0.838768	2.5625e-06	0	0	0	0	0	0	683	649	650	755	467	812	12	69	319	0	0	0	0	1	914
Fzd5	-1.16462	0.189606	5.45622e-08	2025	2334	1586	1356	1724	1468	6338	6114	5681	4493	5245	5320	3053	3554	3930	3303	2675	2576				Nlrp6	-4.46062	0.680463	2.5625e-06	595	762	1862	542	161	322	12683	12703	8461	15431	15204	16951	2688	4079	8808	4101	5454	6275	76	346	11776
Piwil4	-4.23782	0.590617	5.50376e-08	6	2	1	1	1	0	104	90	102	92	132	141	44	91	196	13	15	12				Gm16505	4.16815	0.675516	2.61611e-06	264	260	138	96	70	108	4	2	7	0	3	3	18	9	9	26	9	6	199	253	6
Gpx8	5.85873	0.626524	5.52258e-08	598	458	658	648	940	815	8	5	16	3	0	0	18	21	6	2	0	0				Maged2	2.01892	0.372863	2.61901e-06	2222	1742	1555	1373	1968	1946	314	351	350	165	137	177	400	330	318	215	243	180	1239	1605	392
2010003K11Rik	-4.51581	0.579763	5.59915e-08	15	22	7	24	20	7	241	313	270	709	691	646	161	126	231	438	348	198				Tmem182	-6.08063	0.756954	2.62363e-06	0	0	2	0	0	0	153	167	161	78	74	107	54	71	85	74	88	74	0	1	130
Usp12	-1.74771	0.281364	5.60973e-08	817	874	741	928	767	684	2030	2185	2027	2832	2845	2933	2127	2279	2069	2818	2441	2336				Lyst	1.61383	0.30078	2.64455e-06	1164	1095	984	948	860	953	543	645	756	411	510	509	484	410	665	900	594	584	950	1662	436
Ccdc80	5.81145	0.673523	5.74002e-08	522	377	593	369	955	1185	1	1	0	1	2	0	439	197	15	7	7	11				Alpi	-6.5	0.915047	2.68057e-06	4	39	26	1	0	0	47615	52170	40165	31067	27820	31168	161	329	1004	1297	1509	1777	36	12	16128
Efemp2	3.41415	0.491434	5.85038e-08	1195	1039	1348	538	692	873	120	121	60	116	97	129	128	71	135	36	45	90				Thbs1	3.96555	0.625902	2.69705e-06	27959	24592	37513	7888	35509	34654	128	178	600	192	278	211	6996	3484	1354	181	272	224	7251	13252	171
Aldh16a1	-1.54499	0.250677	5.88713e-08	1446	1477	1562	1460	1650	1495	3804	4227	3520	4761	4857	5415	2632	2941	2912	3649	3405	3462				Dll3	-4.49159	0.73814	2.7113e-06	5	0	5	1	3	1	34	26	29	30	51	39	11	44	28	1	2	0	1	4	91
Atp8a1	1.38167	0.232493	5.88713e-08	3798	3540	3106	1910	2696	3115	2928	3090	2726	1848	1957	2275	1204	1169	2225	4862	4946	5374				Kif3c	2.14554	0.397853	2.73328e-06	472	584	638	455	681	634	73	95	79	45	38	72	183	106	158	163	99	119	264	491	119
Lbp	5.37085	0.672918	5.93202e-08	887	895	1924	333	493	955	51	45	46	2	3	5	44	50	70	4	7	3				Gm45889	-6.0359	0.768067	2.7381e-06	1	0	1	0	0	0	111	119	104	125	116	136	211	479	555	292	186	102	0	1	192
Wdr62	-1.64236	0.275522	5.93202e-08	182	281	292	351	333	280	404	410	462	349	422	456	875	1110	367	765	632	663				AC171111.1	-6.49928	0.876622	2.74838e-06	0	1	0	6	0	1	1195	1227	1637	216	225	292	118	159	148	3	7	5	0	1	300
Tead2	2.32045	0.35769	5.94898e-08	1658	1465	1509	1652	3076	2323	345	426	376	206	256	378	493	553	430	463	458	430				Gm6986	-1.8867	0.35352	2.94675e-06	92	107	156	176	155	149	304	286	314	242	199	257	274	450	202	239	235	196	98	134	312
Sytl4	1.58298	0.259274	6.14614e-08	394	419	340	346	355	467	210	206	213	119	149	154	122	168	160	95	82	97				Lrmda	4.43551	0.842214	2.94675e-06	142	94	85	24	8	68	8	36	7	6	5	6	1	4	10	0	0	2	41	30	4
Recql4	-1.73469	0.289403	6.2123e-08	174	240	254	254	281	210	506	465	393	338	354	422	578	723	246	473	349	397				Tcp11l2	2.84248	0.526488	2.94675e-06	1184	1195	873	741	532	871	300	345	328	126	129	114	346	181	346	312	207	160	1181	1256	185
Ldb3	-4.51806	0.569572	6.27159e-08	52	43	29	16	13	17	725	684	521	1653	1629	1497	738	944	1337	182	185	128				Syt14	-5.15388	0.870702	3.02124e-06	0	0	0	0	0	0	9	18	34	14	34	8	583	369	151	56	50	135	0	0	35
Fbf1	1.58929	0.259845	6.33405e-08	2838	2567	2460	1967	2463	2580	1264	1224	1155	654	768	803	995	1200	966	1310	1167	1178				Aldh6a1	1.7089	0.330311	3.02703e-06	2657	2571	1887	1328	967	1313	1829	2100	1873	1120	1070	1121	590	573	1210	1085	1114	997	1944	2245	1536
Gm44985	3.21329	0.518791	6.42061e-08	1363	1684	962	769	668	698	473	432	458	100	114	172	113	249	367	237	215	105				Bend7	2.80886	0.565033	3.03377e-06	430	364	388	174	323	462	239	259	335	117	121	125	3	5	63	1	0	0	97	362	76
Nalcn	6.402	0.592948	6.54275e-08	223	252	310	110	90	256	3	7	6	0	0	0	0	0	0	0	0	0				Gsdmc4	3.4691	0.778058	3.03486e-06	0	8	2	5	0	2	26	15	4	2	4	7	2	16	142	10534	14598	8472	51	280	65
Abo	5.30355	0.666009	6.67902e-08	139	165	65	208	124	137	0	0	0	1	2	2	28	14	7	793	663	653				Col4a6	6.94393	0.953525	3.03662e-06	897	675	927	75	198	405	0	0	0	0	0	0	1	2	0	0	0	0	302	315	0
Mapk15	4.13444	0.59783	6.67902e-08	233	261	144	72	71	138	23	24	21	2	8	8	7	22	22	76	56	25				Cavin1	2.25687	0.387442	3.08025e-06	5703	6381	6753	7412	9168	8053	350	458	260	641	903	697	4771	4173	1546	3904	3354	2949	8040	10953	528
Alox12	6.66716	0.713804	6.73366e-08	386	350	281	238	227	237	2	1	1	0	0	0	13	9	2	114	51	18				Fbxl6	1.08737	0.206624	3.20234e-06	1428	1388	1346	1314	1498	1491	1299	1354	1220	780	812	926	858	978	975	1149	950	814	1649	1863	1271
Arg2	-4.19315	0.508089	6.80558e-08	92	79	61	42	26	42	2295	2579	2069	3649	3453	3940	9	13	39	87	135	127				1810010H24Rik	3.38468	0.638571	3.28025e-06	227	183	82	34	27	62	51	46	42	24	20	33	17	25	30	17	27	17	112	285	36
Ccdc102a	4.19818	0.556986	6.80657e-08	224	186	143	79	138	200	5	6	11	1	9	8	30	16	19	22	7	12				A030001D20Rik	3.32416	0.593282	3.30907e-06	104	125	116	42	65	85	13	12	14	6	4	5	10	10	7	33	70	29	72	161	17
1700066B19Rik	2.34223	0.368383	7.14889e-08	1126	1146	1136	2060	1800	1453	349	459	321	203	293	262	544	485	631	1223	1056	969				Nrxn2	3.87014	0.631101	3.3357e-06	33	37	16	29	13	18	6	9	8	5	4	6	2	0	4	7	5	3	53	45	6
Paqr9	-4.11091	0.578105	7.20612e-08	6	3	3	7	14	11	27	25	15	70	78	72	5	1	0	2	5	3				Apoa4	-7.30725	1.01007	3.35792e-06	0	0	1	1	0	0	11586	11953	7425	129819	123181	103130	11	156	363	5	25	3	1	43	49262
Stx19	5.42345	0.631845	7.3718e-08	188	205	90	220	280	199	1	0	10	1	3	1	7	8	6	10	14	5				Trim30d	-4.38628	0.717689	3.40901e-06	45	23	17	13	10	7	313	357	393	891	743	703	143	150	322	754	732	654	6	0	248
Col14a1	6.60591	0.684784	7.5108e-08	635	261	2504	225	468	694	5	2	5	6	6	1	6	16	8	2	1	4				Vwa5b2	-5.12875	0.784715	3.43671e-06	0	2	0	1	4	1	452	360	444	81	100	141	19	101	90	11	14	10	3	1	385
Snx32	3.24154	0.464472	7.85182e-08	167	136	126	111	115	95	23	10	13	14	12	10	10	13	9	36	27	19				Osbpl2	1.22822	0.23198	3.44097e-06	2874	3208	2206	2442	2265	2331	1386	1497	1633	1398	1383	1502	1732	1820	1790	2927	2651	2344	4025	2654	1626
Nup62	-1.01128	0.170176	7.85226e-08	1328	1410	1365	1466	1661	1446	2694	2480	2236	1765	2077	2395	2592	3011	1835	2436	2252	2081				Fbxo32	2.34591	0.440076	3.44442e-06	1155	1124	846	580	882	1104	168	195	219	110	128	92	977	648	715	694	586	847	828	895	189
Tgfb1	1.46368	0.240913	8.25116e-08	854	826	769	702	899	856	315	341	222	299	297	302	560	428	524	1088	801	726				Htra1	4.40316	0.806356	3.44442e-06	217	166	212	18	82	72	16	10	8	3	2	2	12	22	25	2	2	0	263	41	7
Dzip1	4.03629	0.526714	8.40247e-08	251	203	184	132	227	299	8	12	12	9	3	9	17	17	10	17	6	2				Smim24	-4.19573	0.636819	3.44442e-06	98	191	33	110	109	112	15456	15742	16334	23923	22087	24788	511	940	7919	1270	1046	1025	171	67	16090
Alppl2	-6.05067	0.79611	8.53379e-08	0	0	1	0	0	0	161	214	168	181	210	179	5	9	69	15	9	25				Gm11771	4.47154	0.744094	3.45195e-06	34	71	33	14	6	14	5	3	1	6	7	12	21	15	14	1315	1934	1325	584	205	16
Gemin8	2.22066	0.360259	8.53379e-08	259	242	222	189	171	252	99	116	93	40	52	55	90	87	114	92	83	62				Porcn	2.63586	0.466682	3.50415e-06	5055	4428	3329	1847	2437	3003	370	384	234	196	191	266	479	283	163	203	190	159	2384	3102	376
Klf15	3.68992	0.570172	8.57698e-08	161	140	120	66	42	49	50	97	59	16	8	25	2	5	27	0	0	0				Slc25a25	-1.52756	0.291862	3.50505e-06	486	511	417	602	757	634	866	923	946	1213	1280	1441	1722	2098	1289	1044	837	835	678	671	1514
Prlr	-6.0858	0.646918	8.70331e-08	5	1	2	0	1	0	2198	2382	2375	2117	1702	1727	0	18	267	1	2	6				Hspd1	-1.1806	0.225659	3.59202e-06	3142	3264	3814	4786	4931	4349	6753	7386	8103	6034	6524	7629	6161	8114	4897	6364	5549	5068	5206	5390	8749
Lyst	1.45189	0.243102	8.87121e-08	1164	1095	984	948	860	953	543	645	756	411	510	509	484	410	665	900	594	584				Pola2	-1.02187	0.194539	3.59202e-06	1130	1318	1449	1567	1490	1315	2569	2671	2546	2145	2363	2743	2542	3471	2296	2634	2382	2584	1566	1857	2981
Fundc1	1.17145	0.195806	8.93289e-08	1667	1566	1470	1634	1463	1641	838	853	881	633	657	681	903	789	837	1645	1374	1024				Ttpal	-1.32885	0.252994	3.59202e-06	731	743	494	611	863	787	926	967	1020	1130	1237	1265	1542	1519	1169	1501	1339	1225	799	646	1142
Btbd17	5.0825	0.565041	8.94443e-08	371	381	476	274	399	572	3	9	5	9	1	11	7	11	3	4	2	9				Slc6a4	-6.53129	0.790681	3.62796e-06	2	0	0	1	3	1	941	1005	972	636	750	883	3	10	138	16	13	21	0	1	1205
Snrk	-1.13937	0.191746	9.01332e-08	745	686	681	801	811	628	1116	1180	1065	1298	1277	1289	1791	1518	1257	2074	1608	1625				Dpyd	-4.11974	0.637538	3.63476e-06	0	6	1	5	5	3	3938	3955	4182	4340	3712	4519	40	179	864	0	5	5	58	30	4327
Abcg1	4.53528	0.601675	9.04877e-08	253	215	182	128	392	364	15	14	25	3	3	7	26	34	32	3	6	13				Cers3	4.29107	0.654164	3.70929e-06	399	339	200	185	147	281	2	14	3	10	12	14	590	176	57	420	171	217	1126	840	19
9030622O22Rik	4.04412	0.611106	9.08458e-08	312	416	186	80	172	156	70	58	53	13	7	18	6	14	39	17	15	1				Enpp5	1.49774	0.291309	3.72126e-06	2927	2617	2623	1715	1829	2118	1169	1205	1106	568	612	680	681	508	940	1091	1083	947	1129	1379	1004
Klhdc7a	4.01312	0.537068	9.35685e-08	4214	3965	3890	2642	3519	3969	168	268	213	57	71	60	1022	767	321	1154	982	722				Arnt2	-4.33959	0.766427	3.7259e-06	115	65	222	40	83	84	203	169	286	744	909	566	268	597	237	9	10	47	9	16	206
Sptbn2	3.75143	0.549805	9.46189e-08	2004	2071	2185	847	1527	1527	284	292	245	65	80	88	322	450	405	205	246	74				Nr1i3	-5.93285	0.83788	3.73345e-06	1	17	2	0	0	0	1858	1724	1528	1696	1924	1944	8	54	84	324	409	139	0	3	1229
Sbspon	5.58095	0.65011	9.47912e-08	341	196	523	280	287	608	10	11	6	0	2	0	22	32	15	2	0	1				Man1c1	3.08329	0.626076	3.78078e-06	403	399	205	154	245	388	15	15	16	12	8	15	11	3	25	14	9	7	133	426	124
Fzd8	2.05749	0.329782	9.87702e-08	198	186	222	210	301	273	47	65	62	55	55	58	56	53	64	191	208	205				Dck	-1.58573	0.300324	3.79973e-06	470	504	659	763	897	778	1188	1191	1111	998	1021	1191	1237	1751	1034	1277	1176	1163	395	647	1264
Erich4	-7.20079	0.839944	9.89444e-08	0	0	0	0	0	0	189	260	186	423	399	391	4	6	62	6	14	16				Btbd17	3.66635	0.565175	4.06807e-06	371	381	476	274	399	572	3	9	5	9	1	11	7	11	3	4	2	9	240	507	16
Prr36	3.17239	0.517071	9.95895e-08	105	147	134	46	26	59	40	54	40	23	17	30	7	12	35	32	41	33				4921507P07Rik	2.24274	0.432294	4.1444e-06	133	149	82	85	87	107	53	69	75	31	19	26	47	36	66	53	45	42	118	171	58
Cuedc1	2.72686	0.434691	9.96708e-08	1154	1125	881	758	1089	1101	367	437	401	179	130	162	378	381	613	211	177	93				Ttc39b	1.20487	0.229175	4.18132e-06	2480	2577	2187	2251	1909	1754	1546	1601	1595	1584	1699	1712	2110	2019	2148	3826	2829	2642	3518	3014	1848
Pax9	9.25285	0.782098	1.01706e-07	897	840	1636	516	598	1478	0	0	0	0	0	1	2	4	0	2	1	7				Cse1l	-1.00993	0.194006	4.21304e-06	3498	3456	3805	4359	4601	4335	5051	4923	5266	4437	4660	5111	5133	7451	4323	5692	5045	5046	3360	3859	5231
Eps8l3	-1.52229	0.249662	1.02786e-07	5168	5208	4429	4108	3381	3378	13081	13227	12924	13598	15248	15282	13055	11677	13101	19241	16289	15558				Amn	-4.7863	0.76433	4.25367e-06	0	4	7	24	17	12	829	997	839	921	1089	1124	131	253	516	9	97	77	10	12	1535
Arl14	1.91869	0.311142	1.03729e-07	3950	3688	3372	2036	2159	2447	774	1015	889	796	772	753	814	749	652	1398	1085	1177				6430562O15Rik	5.54571	0.888386	4.27e-06	61	65	31	9	25	32	1	1	0	0	0	0	1	0	0	2	1	2	34	39	0
Tgfbi	-6.8715	0.745255	1.04517e-07	0	0	0	0	1	2	1576	1880	2249	631	554	588	42	78	753	26	57	212				Apoc3	-7.09129	0.998646	4.27257e-06	0	0	0	0	0	0	462	496	422	3314	2625	2348	6	14	68	0	0	0	0	0	1571
Tmem167b	1.06631	0.179458	1.04954e-07	3387	3174	2715	2485	3007	2823	1319	1376	1552	1431	1541	1572	1499	1342	1448	2175	2025	1734				Abcc5	1.76768	0.322682	4.27909e-06	4985	5101	3777	4241	5193	5516	1527	1653	1740	1770	1885	1630	2764	2276	1606	2797	2322	2571	8685	3879	1030
Nectin4	2.84924	0.427996	1.08058e-07	998	995	763	612	840	781	108	137	109	53	59	57	837	746	375	150	187	97				Bpifb1	9.2311	0.993255	4.33057e-06	8309	9090	7794	1317	1792	12910	0	0	0	0	0	0	2	2	0	0	3	1	5116	61553	1
Defa2	-8.42269	0.85141	1.09288e-07	0	0	0	0	0	0	731	1092	1102	2547	1883	2238	722	1758	15107	0	5	0				Sirt5	1.04894	0.203358	4.45022e-06	484	491	352	363	352	335	426	461	429	266	347	412	285	271	417	396	415	295	423	550	434
Limd2	2.96264	0.443658	1.098e-07	942	898	826	803	1539	1284	145	177	218	81	88	74	222	198	183	53	37	51				Vsig1	3.65237	0.557356	4.45073e-06	13223	14130	11046	12823	10585	11777	84	120	110	152	212	110	85	177	23	889	689	197	15425	15468	115
Lmo4	1.67045	0.274361	1.098e-07	2896	3281	2514	2408	2739	3682	1324	1198	1007	700	806	842	1047	987	907	799	660	577				Tff1	6.57173	0.905334	4.47254e-06	24835	45842	6488	11648	20506	9387	8	16	35	8	7	8	8	26	4	0	0	0	142823	11304	11
Asph	1.5751	0.26543	1.09988e-07	8514	8568	9102	5658	4976	5564	4581	4745	4455	3027	3316	3385	3353	3693	4571	3193	2965	2795				Asb3	1.12462	0.214741	4.49252e-06	656	651	481	455	502	511	313	333	376	250	284	286	471	432	417	465	431	413	632	578	250
Ttc8	4.07566	0.556547	1.12276e-07	491	501	294	273	404	443	39	33	46	15	9	12	30	11	19	27	64	35				Itih2	7.53651	0.85277	4.49615e-06	229	260	451	99	271	356	0	0	1	0	0	0	1	1	0	4	6	1	274	942	0
Grb14	4.31116	0.584657	1.14137e-07	437	405	306	306	582	388	55	57	33	11	5	21	17	9	24	1	5	5				Spdl1	-1.97416	0.385261	4.49634e-06	311	306	481	648	654	545	551	579	569	819	969	1123	979	1072	479	1253	1028	1068	276	490	695
Gucd1	-1.90104	0.300482	1.14721e-07	629	672	466	486	669	602	3867	3999	3360	3968	4370	4190	1764	1513	3534	3026	3084	3396				F10	-6.94975	0.94291	4.507e-06	0	0	0	0	0	1	3	4	8	5	5	10	0	0	0	0	0	0	0	0	54
Mgam	-5.21405	0.616511	1.16148e-07	248	219	1409	735	638	593	22980	26160	26190	69027	65797	65850	18697	23820	51475	17765	14658	16713				Katnal1	2.98532	0.590462	4.52209e-06	335	271	309	191	245	330	109	127	162	17	27	31	31	27	78	75	73	58	143	356	70
Gldc	5.29661	0.598034	1.18231e-07	613	961	343	1390	1499	914	4	14	7	22	21	12	7	15	12	3	1	3				Kif24	-1.68911	0.318546	4.59757e-06	232	318	396	402	409	379	706	662	523	539	632	669	578	745	532	649	602	629	195	390	898
Apoa1	-10.272	0.795153	1.19089e-07	1	5	2	0	1	2	8737	11490	9037	75943	68886	56587	77	538	3824	0	12	3				Adcyap1r1	5.78752	0.993719	4.64512e-06	126	178	37	13	12	16	5	0	0	2	1	0	2	1	3	0	1	2	70	103	0
Defa27	-6.6727	0.847295	1.20114e-07	0	0	0	0	0	0	73	85	160	228	169	187	20	42	170	0	0	0				Eml4	-1.43847	0.270283	4.64566e-06	2917	3200	4009	4316	2878	2685	10410	10653	9110	9083	9731	10388	8491	9028	11445	11988	10410	8142	3091	3627	10458
Fgf9	4.05121	0.600919	1.20931e-07	363	378	318	136	211	310	52	76	83	17	12	3	0	1	3	4	34	13				Farp1	-1.44455	0.274479	4.65406e-06	2015	1785	2244	2107	3426	2308	2560	2750	2594	2061	2216	2553	3390	3986	2960	3075	2734	2773	1342	977	2639
Enpep	-9.69717	0.857909	1.21814e-07	0	0	0	0	0	0	970	942	1235	10756	10657	9343	98	388	2765	20	17	8				Paxip1	-1.07516	0.207323	4.65406e-06	1120	1227	1132	1274	1387	1180	2572	2441	2395	1715	1891	2175	2327	3266	1723	2240	2035	1874	1286	1585	2382
Spred3	2.72851	0.412075	1.24583e-07	1033	906	655	474	744	1145	83	92	72	83	107	85	398	182	211	414	272	256				AU021092	5.6053	0.816646	4.65629e-06	735	823	1451	391	520	761	62	34	8	6	2	12	4	1	0	14	4	12	478	1378	7
Adh4	-7.98726	0.832019	1.26115e-07	0	0	0	0	0	0	1117	1149	786	1257	1109	1321	1	4	119	0	0	0				Gm14150	-1.57533	0.303893	4.66941e-06	259	276	375	443	582	466	619	542	524	502	569	639	637	792	430	737	661	726	312	334	605
Ldlrad3	2.43715	0.390789	1.3258e-07	371	273	454	274	612	432	91	68	112	78	74	65	126	149	167	1991	1845	1375				Fzd10	5.22245	0.823783	4.72217e-06	17	18	9	15	51	27	0	0	0	0	0	0	47	25	36	55	141	299	157	266	2
Gstm2	2.5861	0.420068	1.33333e-07	1790	2013	1449	904	767	840	627	514	432	211	315	371	121	145	188	222	226	154				Muc3a	-4.38612	0.696325	4.76978e-06	3	5	6	13	10	1	2252	1600	1050	379	341	411	405	506	1170	497	492	616	3	11	888
Dna2	-2.38263	0.391928	1.35189e-07	219	291	459	492	627	508	1645	1566	1648	1157	1236	1456	1268	2006	842	976	841	783				Tlr4	2.39465	0.434213	4.80215e-06	1413	1611	898	1234	1019	917	57	150	95	124	130	113	1216	1008	623	1960	1572	1695	1959	1459	161
Mpp3	-2.45354	0.377909	1.38365e-07	72	82	113	80	62	63	992	895	695	456	457	570	381	592	495	545	622	695				Prkar2b	2.61953	0.490505	4.84294e-06	738	744	1229	950	714	895	71	70	95	46	60	47	111	56	153	4	5	2	666	741	99
Mex3c	-1.37156	0.234141	1.40345e-07	2148	2107	2237	2970	3166	2590	3398	3521	3689	4147	4762	4617	5624	4855	3461	5090	4251	4381				5930430L01Rik	2.02384	0.393487	5.03055e-06	112	124	101	77	63	62	109	104	90	53	63	48	43	62	92	77	94	62	82	120	35
Napepld	1.38612	0.2343	1.41221e-07	1718	1768	1988	1632	1508	1771	963	968	961	678	672	757	513	678	616	1244	1046	733				Armcx2	4.46874	0.748394	5.12574e-06	252	153	90	68	47	112	0	1	1	0	0	0	0	0	0	0	2	0	50	41	3
Lepr	7.46731	0.84772	1.42066e-07	256	228	315	38	46	27	1	0	0	0	0	0	4	2	5	0	5	0				Tmem189	1.61158	0.296355	5.26559e-06	1344	1573	1095	1366	1619	1346	256	239	205	213	212	257	209	238	97	1121	1082	955	2302	1329	379
Cmtm8	4.65234	0.610219	1.46706e-07	1103	997	1140	885	941	1149	91	116	77	17	10	14	5	8	7	8	22	21				Pyroxd1	1.09733	0.212287	5.41401e-06	1616	1626	1211	1047	1227	1170	901	981	1049	740	842	877	1079	815	994	1500	1542	1340	1433	1474	949
Trpv4	5.6627	0.591046	1.50203e-07	335	278	462	240	497	400	2	4	3	4	1	3	5	10	1	3	3	6				Defa22	-6.11418	0.86135	5.44918e-06	0	0	0	0	0	0	293	358	500	1030	814	822	175	382	3391	0	2	0	2	0	892
Trmt61a	-1.43324	0.243284	1.51311e-07	228	207	174	208	278	227	441	433	495	431	435	512	416	599	330	336	305	354				Flvcr2	-3.56648	0.624955	5.5936e-06	76	57	105	145	214	249	33	27	22	48	42	29	18	6	8	54	36	27	19	8	71
Gm47451	3.20297	0.649794	1.52729e-07	42	25	27	8	1	5	16	14	21	5	3	0	0	0	17	0	2	4				Nectin3	-1.49452	0.280895	5.64844e-06	1413	1462	1206	1758	1064	1070	6271	6991	6793	6066	6084	6898	3606	4691	6113	4915	5288	5824	1376	2200	6842
Itm2c	2.03291	0.335701	1.55409e-07	6728	6060	5936	4232	5228	6494	2413	2601	2726	1156	1381	1461	2154	1824	2234	2062	1539	1600				Chst11	-2.4861	0.457468	5.67442e-06	223	163	422	296	346	483	770	780	835	390	435	484	1339	1606	942	2357	1546	1833	385	318	2101
Prss22	4.6437	0.550198	1.56359e-07	2489	1588	1866	1826	3424	3101	7	8	6	40	43	24	190	153	38	320	266	370				Filip1l	1.27605	0.243143	5.69465e-06	3210	2887	3170	2784	2949	2782	748	787	901	563	655	590	1448	1395	817	1355	1164	1218	2309	1989	807
Gkn1	10.1465	0.812914	1.60284e-07	8199	18671	2484	924	2029	2887	0	1	0	0	0	4	1	3	1	1	0	0				Aspg	-4.07257	0.647251	5.74607e-06	4	7	16	14	19	26	158	156	115	98	108	199	206	268	595	280	374	600	5	53	1518
Hivep3	4.56342	0.63384	1.64572e-07	359	378	153	53	63	82	20	15	13	8	4	5	21	7	27	78	133	134				Ptges3l	2.04643	0.385078	5.75314e-06	187	179	158	110	109	144	51	58	58	58	71	70	34	68	53	60	43	37	193	146	57
Vwce	-6.27466	0.680155	1.6838e-07	3	4	7	3	6	5	460	535	397	1496	1602	1868	3	34	46	0	0	1				Plin5	3.88931	0.682245	5.78443e-06	218	229	71	75	75	57	16	9	7	11	4	5	3	2	4	17	7	29	77	138	6
Bmp2k	-1.62984	0.269306	1.70129e-07	323	350	327	396	402	302	1245	1222	1180	1343	1339	1530	739	813	999	1168	1050	1372				Phf21b	-1.81841	0.34761	5.85875e-06	146	170	221	244	155	176	621	625	586	406	470	489	815	890	537	930	858	692	114	262	511
Hist1h4i	-2.14722	0.36541	1.70492e-07	21	24	29	49	59	39	60	57	54	68	58	67	93	89	30	117	92	99				Qsox2	-1.1539	0.218053	5.95201e-06	943	906	996	1049	1121	1101	3323	3487	3034	2063	2373	2661	1898	2016	3458	1981	2256	2077	889	1262	4219
Fam98c	-1.12485	0.189647	1.71352e-07	761	824	730	675	728	718	2016	2252	1972	2033	2335	2509	1373	1517	1995	2928	2846	2474				Svip	-1.08487	0.205827	6.02277e-06	536	536	509	507	427	417	2749	2598	2819	1696	1512	1768	641	703	1144	864	798	718	422	511	1984
Plxnd1	2.39922	0.381916	1.76088e-07	887	743	738	595	1113	901	176	265	164	164	167	162	125	85	129	40	51	81				Cdhr2	-3.0722	0.569053	6.19734e-06	1893	2287	1002	3947	4510	3276	12979	14778	13873	31945	29551	27235	18538	11522	17099	44652	41742	41933	2827	1653	17506
Shank2	3.0007	0.487669	1.77987e-07	2278	2188	2396	1549	2046	1877	966	1035	972	216	259	334	119	140	273	122	128	86				Orai2	1.34245	0.261865	6.26488e-06	1207	1192	883	766	1043	1017	885	1015	1145	633	800	813	898	882	1083	872	800	707	1397	1306	1081
Gaa	1.55074	0.26492	1.80363e-07	7791	7484	7582	4589	4631	4832	3843	4141	3545	2426	2749	3114	2408	2580	3082	3501	3005	2892				Pank1	-1.43461	0.274399	6.26621e-06	467	624	719	805	799	714	1928	2205	1775	1850	1921	2025	887	1251	1261	1554	1484	1409	554	623	1599
Tbc1d16	2.22829	0.37656	1.81213e-07	2425	2329	2463	1516	1414	1441	872	1058	1182	950	810	997	335	302	767	195	477	421				Selenow	1.74429	0.35273	6.26629e-06	2833	2596	1953	1017	1531	1557	2651	2858	3352	1828	1882	2187	754	733	1938	2188	2233	2206	2981	2100	3324
Ceacam20	-8.05905	0.78345	1.81553e-07	0	0	2	2	0	0	353	310	263	2903	2490	2426	354	241	1054	3278	3317	3135				Fam110c	1.46454	0.282931	6.31875e-06	1047	1121	1031	1002	934	860	604	645	533	685	635	585	620	476	714	835	645	618	1514	1156	735
Peg3	4.12374	0.621903	1.81911e-07	1616	1348	1665	678	671	728	250	317	274	34	26	39	19	32	68	6	5	2				Mlkl	1.73232	0.322182	6.37455e-06	894	1004	928	1496	1390	1025	354	348	303	274	351	375	1092	851	750	1951	1728	1852	1141	1128	140
3930402G23Rik	-3.20589	0.463336	1.82914e-07	24	19	21	41	16	16	670	662	548	253	326	332	254	174	455	355	246	248				Epb41l1	2.12531	0.410746	6.39565e-06	2296	2519	1735	1441	1238	1131	720	871	746	423	478	364	1661	1028	1458	3018	2125	2269	3138	3308	1258
Nectin3	-1.63121	0.267001	1.83041e-07	1413	1462	1206	1758	1064	1070	6271	6991	6793	6066	6084	6898	3606	4691	6113	4915	5288	5824				Zfp839	1.03377	0.204451	6.40559e-06	558	540	443	350	386	393	523	479	469	338	329	396	319	262	523	447	392	339	402	558	501
Gpr17	-5.46506	0.833542	1.88052e-07	0	0	0	0	0	0	11	20	21	35	22	42	22	16	27	15	17	16				Rfx6	-5.90767	0.877827	6.49866e-06	5	3	2	0	0	1	323	293	408	88	85	107	19	89	88	13	7	8	0	0	274
Grtp1	-1.20814	0.203221	1.88052e-07	610	715	479	482	486	391	1929	2046	1874	1407	1605	1623	1510	1593	1889	2091	1729	1533				Chdh	-1.55002	0.292826	6.5577e-06	1856	1934	2639	2412	2079	1813	6948	7408	6250	7177	7362	7980	2861	3498	5379	4050	3175	2984	1354	1424	4983
Rimbp2	-5.11177	0.67822	1.91377e-07	3	0	0	0	2	0	238	204	380	90	85	118	46	97	227	30	40	22				Foxq1	2.82091	0.509177	6.60488e-06	13983	16615	8266	8477	16109	13845	2150	2557	2487	872	954	959	3050	2461	1160	2829	2071	2149	23059	18264	2538
Nxf7	-5.57655	0.807118	1.93155e-07	0	0	0	2	0	0	26	72	15	45	51	41	94	230	107	0	0	0				Hnf4g	-2.69447	0.489757	6.60736e-06	169	242	124	207	96	98	3891	3975	4304	6581	6957	7103	871	1040	1869	504	308	332	409	450	4891
Qsox1	2.26854	0.36493	1.96071e-07	38099	38022	34748	20141	21272	26271	5798	6392	5409	7285	7485	7630	7072	6460	7301	4033	2809	2078				Bet1l	1.1769	0.226739	6.65802e-06	864	681	541	620	696	697	314	381	367	313	363	354	516	452	368	365	376	333	885	834	423
Bpifb1	11.4753	0.842789	1.96796e-07	8309	9090	7794	1317	1792	12910	0	0	0	0	0	0	2	2	0	0	3	1				Cited4	1.32386	0.253034	6.8531e-06	1103	985	1128	954	1361	1085	109	120	94	91	132	142	169	161	112	116	85	87	303	390	91
Eri3	1.35319	0.232959	1.97065e-07	2410	2256	1886	1503	1652	1890	1404	1356	1403	837	894	962	975	976	1181	1261	970	1021				Foxa2	2.09727	0.40835	6.9544e-06	2223	2309	1662	1476	1956	1760	566	631	758	350	360	394	189	368	377	799	571	268	1804	1595	464
Mov10	-1.32199	0.223783	1.97379e-07	499	448	338	284	410	426	1217	1181	1187	941	1198	1124	604	534	604	434	307	325				Glis2	2.08222	0.395525	6.9544e-06	1351	1281	1098	795	1182	1091	255	298	250	133	238	117	784	732	537	848	514	447	1173	1293	271
Homer3	1.6142	0.264137	2.01026e-07	1475	1294	1100	1111	1911	1646	254	285	309	198	281	270	941	638	418	567	483	405				Dnah2	-4.7532	0.798406	7.09548e-06	69	35	21	9	11	14	263	296	198	1175	1219	1021	124	32	88	39	44	35	7	18	315
Hs6st2	5.96178	0.589788	2.01205e-07	833	426	1570	308	886	725	8	12	17	8	10	6	2	2	2	0	2	0				Sema3b	1.14116	0.225403	7.10539e-06	4326	4249	3364	2593	2792	2897	2465	2803	2074	2117	2227	2296	1535	1623	2136	3861	3547	2993	3874	3744	3260
Scn1b	6.97815	0.740133	2.06098e-07	495	380	256	164	344	392	0	0	0	2	2	0	24	5	4	1	0	0				Qsox1	1.87383	0.358742	7.18783e-06	38099	38022	34748	20141	21272	26271	5798	6392	5409	7285	7485	7630	7072	6460	7301	4033	2809	2078	22462	23565	7209
Mfge8	2.30583	0.370445	2.06199e-07	10422	11130	10400	11697	13067	14155	3267	3655	3420	1679	1806	1680	1640	1653	1505	950	750	506				Adssl1	2.82063	0.568569	7.20983e-06	1331	1165	1067	799	918	1145	89	134	115	23	32	43	75	44	61	130	112	95	392	653	151
Tle2	3.1845	0.502017	2.06202e-07	1331	1412	711	288	409	609	255	200	195	128	130	105	93	71	145	115	90	115				Atp10b	-2.04043	0.387996	7.20983e-06	2623	2867	3905	4334	5258	3977	4399	5032	4390	6806	7588	7225	7462	6032	7032	17041	14344	14588	1975	1440	6477
Tkfc	-4.45137	0.56967	2.08242e-07	921	842	987	796	892	899	17462	18230	18080	59537	56899	61398	2800	3526	9491	1862	1503	1026				Sik1	1.91538	0.360574	7.32012e-06	1728	1716	1682	867	1126	1251	518	559	530	379	437	387	552	438	273	584	433	470	1639	1302	397
Muc3a	-5.38342	0.626984	2.08383e-07	3	5	6	13	10	1	2252	1600	1050	379	341	411	405	506	1170	497	492	616				Tff3	-5.32922	0.758865	7.33709e-06	62	63	9	3	4	0	11871	11769	12118	6643	7141	7202	3499	6235	13919	756	997	897	45	44	17325
P3h3	4.05903	0.615288	2.08819e-07	220	140	94	37	30	74	16	34	24	6	5	7	9	8	28	1	6	5				Akap7	-1.1665	0.224067	7.44482e-06	608	579	582	774	569	545	2456	2431	2399	1707	1808	1883	1012	1216	1545	1712	1508	1393	469	730	2240
Mgmt	2.38802	0.389692	2.08916e-07	859	670	572	361	483	609	159	213	229	120	103	100	184	148	172	215	197	176				Pbxip1	1.48306	0.295945	7.44482e-06	4160	3653	3369	1493	2271	3082	2070	2165	1831	1409	1451	1688	1305	1363	2124	2091	2089	1899	1682	1851	1416
Dtwd2	-2.0375	0.345879	2.11362e-07	29	48	32	58	65	39	104	111	131	79	96	119	141	151	65	94	96	93				Prlr	-6.66898	0.890336	7.46753e-06	5	1	2	0	1	0	2198	2382	2375	2117	1702	1727	0	18	267	1	2	6	0	0	1035
Angptl2	8.15345	0.706232	2.23391e-07	1403	953	1814	1411	2437	2133	0	0	0	0	4	0	12	11	2	74	18	10				Tubg1	-1.20112	0.238175	7.47854e-06	1293	1374	1491	1947	2196	1792	1112	1225	1067	1290	1408	1606	2060	2518	1258	2450	2131	2220	1239	1125	1438
Glns-ps1	3.10953	0.517427	2.28316e-07	2182	2490	1451	871	845	1127	629	644	711	159	182	226	178	204	408	1596	1235	761				Gm14851	-6.54517	0.850245	7.69746e-06	0	0	0	0	0	0	844	804	1319	1130	904	1251	6	17	121	0	1	0	0	1	570
Acnat2	3.27771	0.498505	2.2938e-07	209	242	165	82	98	119	35	18	22	27	26	38	10	7	19	32	29	34				Chpf2	1.67951	0.324457	7.82898e-06	2412	2137	1634	1680	1624	1423	694	759	656	344	386	465	496	563	393	485	472	396	2178	1966	669
Gm43845	7.69065	0.761715	2.30999e-07	129	77	76	49	73	92	0	0	0	0	0	0	0	0	0	0	0	0				Nlrp9b	-5.19873	0.927711	7.82898e-06	0	0	3	0	0	0	115	127	105	1022	887	874	206	111	323	1324	1186	1272	0	0	416
Armcx6	6.93958	0.763402	2.32407e-07	82	82	52	61	34	52	0	1	1	0	0	0	0	0	0	0	0	0				Ppic	4.11504	0.729704	7.95677e-06	2449	2135	1832	1866	3124	1774	282	429	261	42	87	38	552	213	158	258	449	221	1615	2916	133
Nenf	1.42251	0.24526	2.33687e-07	825	686	688	616	706	723	301	422	424	335	387	456	454	382	667	614	633	494				Irx3	5.82855	0.857727	8.00327e-06	245	294	463	159	278	925	0	1	1	4	2	4	30	4	7	55	62	213	145	1505	3
Dip2c	1.2214	0.211268	2.4117e-07	1228	1178	1595	1138	1328	1332	783	833	876	605	558	686	765	811	897	726	692	672				Trac	-3.24777	0.806976	8.00327e-06	1	8	5	9	26	9	1	1	7	19	19	19	8	2	0	15	6	8	2	3	14
Tnfrsf21	2.53326	0.404594	2.42122e-07	5912	6898	3323	2724	3081	2753	797	916	688	580	722	587	1855	1493	1246	3414	2996	2908				Mmp20	-5.26754	0.847259	8.04159e-06	0	0	0	1	0	1	80	111	101	100	98	116	74	49	182	14	28	31	0	0	62
Foxa1	1.28225	0.2175	2.43141e-07	4597	5484	4648	3951	5263	5121	1677	1694	1820	1134	1380	1409	4990	4816	2898	4197	4019	4155				Amer2	3.01034	0.649064	8.11534e-06	164	161	103	28	93	88	32	22	30	2	3	4	0	0	2	6	4	3	118	128	33
Hectd2	5.35887	0.565899	2.46078e-07	172	119	132	93	99	102	2	9	3	6	1	3	0	0	0	0	1	0				Gpx8	3.99219	0.641377	8.30858e-06	598	458	658	648	940	815	8	5	16	3	0	0	18	21	6	2	0	0	324	708	15
Atp6v0e2	-3.12989	0.480121	2.46244e-07	17	22	8	8	31	12	147	122	89	191	161	174	430	413	417	361	495	348				Zfp7	1.00331	0.196582	8.30858e-06	1889	1928	1798	1736	1738	1757	1200	1393	1317	854	926	1021	1993	2155	1483	2300	2030	2119	2015	2323	1011
Fzd4	2.54603	0.408964	2.46453e-07	1242	1189	1799	920	748	1052	232	281	246	315	284	382	49	45	81	79	67	76				St3gal3	-1.88661	0.362083	8.35782e-06	314	219	300	240	531	481	535	513	397	350	372	449	1231	949	801	4903	4939	4680	213	259	660
Gsap	3.61387	0.507782	2.46453e-07	2567	2159	2248	1205	1154	1691	37	61	62	94	164	92	789	558	388	1483	1301	1651				Cracr2b	1.09236	0.217663	8.4715e-06	994	1042	747	884	731	964	604	722	651	438	494	536	736	844	1035	786	577	511	748	941	695
4933412E12Rik	2.62282	0.426253	2.5387e-07	135	122	78	57	96	82	26	30	25	23	23	27	28	15	38	18	31	28				Cdk17	1.37964	0.265651	8.47205e-06	1125	967	1049	846	1168	1256	328	314	351	229	217	249	757	644	379	572	499	434	974	957	297
Plcd3	1.75521	0.287408	2.55302e-07	2130	1895	1993	1609	1779	1894	247	377	236	364	389	312	1078	733	484	2396	1801	1741				Hebp2	2.25333	0.42551	8.54347e-06	353	427	290	248	229	263	49	62	54	51	72	116	52	53	60	196	238	133	240	290	46
Gm28523	-5.68843	0.819237	2.62938e-07	0	0	0	0	0	0	119	88	110	33	37	48	9	11	28	52	55	23				Acat2	-1.74423	0.341051	8.58849e-06	2058	2483	3190	3525	3405	3022	4146	4266	2716	4857	5112	5514	3684	4667	3014	4204	3827	3417	1719	2521	5201
Ccpg1	2.18596	0.372547	2.63062e-07	314	304	235	167	161	204	148	127	136	66	62	70	81	70	118	113	100	93				Cradd	1.10203	0.217495	8.66376e-06	367	382	363	399	386	435	343	360	255	210	219	287	258	253	294	232	206	208	380	431	277
Dnal1	3.55369	0.539682	2.66561e-07	537	464	359	217	292	315	75	71	84	23	20	20	38	29	46	78	64	28				Pde1b	-5.2661	0.815258	8.70393e-06	2	1	1	0	1	5	397	433	344	126	156	167	30	61	221	14	25	31	0	0	291
Gm17189	4.52802	0.597492	2.71988e-07	193	166	201	224	177	140	5	1	0	2	2	5	82	19	16	74	68	31				Tnks1bp1	1.25122	0.244093	8.7064e-06	9458	10149	8120	6824	8653	8100	4456	4721	4777	2637	3415	3410	7223	6375	4593	8658	7366	6895	10380	10310	4535
Porcn	3.11437	0.458735	2.71988e-07	5055	4428	3329	1847	2437	3003	370	384	234	196	191	266	479	283	163	203	190	159				Hsd17b7	-1.88976	0.37927	8.71091e-06	905	1062	948	1359	1792	1430	1819	1921	1493	3588	3394	3294	2854	2901	1545	3929	3610	3200	1167	1236	2118
Oplah	2.01305	0.351437	2.73337e-07	1477	1510	1048	651	805	944	695	743	566	866	619	722	299	299	936	806	823	820				Nhsl1	-2.0058	0.38985	8.71091e-06	1136	1234	1158	1332	1692	1440	2808	2956	2663	5063	5725	5771	5428	5646	5092	8702	7287	7075	1299	1198	3893
4732419C18Rik	-3.22275	0.490259	2.74298e-07	12	19	17	13	10	18	146	103	69	97	129	149	35	15	17	6	10	6				Zfp825	1.03903	0.206598	8.77925e-06	393	392	400	307	276	340	303	301	306	246	224	231	174	209	261	211	186	182	279	368	209
Ppp3cc	1.42596	0.247061	2.74906e-07	240	242	184	206	250	200	98	139	147	91	107	97	121	105	149	309	331	298				Ly6g6e	2.82249	0.517914	9.23388e-06	102	166	57	85	91	111	26	51	31	19	23	38	61	37	39	405	337	235	184	135	12
Smbd1	-5.07566	0.676209	2.7742e-07	2	0	3	0	2	0	91	81	54	46	75	73	6	9	6	11	12	31				Hipk2	-1.5114	0.29604	9.48188e-06	1136	1283	1198	1465	2158	1522	3811	4302	5110	4014	4192	4548	2157	2668	2381	1819	1750	2097	1634	2269	4519
A330074K22Rik	5.94575	0.67884	2.79382e-07	175	134	117	30	28	57	1	1	4	0	4	1	1	1	6	3	0	1				Flot2	2.04628	0.397718	9.54255e-06	1591	1686	1402	1547	1787	1664	1278	1112	1052	428	495	534	1335	1233	1220	971	956	932	1259	2134	582
Ap3m2	1.90324	0.313262	2.8248e-07	460	397	320	275	354	403	63	85	72	79	91	86	186	112	116	129	122	122				Defa2	-6.32823	0.902728	9.68524e-06	0	0	0	0	0	0	731	1092	1102	2547	1883	2238	722	1758	15107	0	5	0	0	4	2473
3110039I08Rik	6.94821	0.688619	2.85024e-07	2058	1146	1452	1129	1277	1323	4	1	3	0	1	1	115	34	4	369	551	56				Ajuba	1.5216	0.286803	9.8502e-06	3823	4095	3798	3599	5908	4910	676	976	751	591	731	640	4256	4094	1545	2726	1857	1862	5779	4686	642
Lrpprc	-1.08464	0.187941	2.86137e-07	2435	2281	2464	2717	2908	2396	6827	6413	6051	4426	4939	5329	4041	5035	4170	4471	3687	3561				Fzd4	2.19394	0.424324	9.97729e-06	1242	1189	1799	920	748	1052	232	281	246	315	284	382	49	45	81	79	67	76	1789	1209	558
Otop3	4.38753	0.576705	2.93538e-07	3019	3290	1958	880	1254	986	296	525	420	119	69	90	0	3	2	0	0	2				Plagl2	-1.01515	0.199848	1.00669e-05	1894	1996	2045	1780	2107	2186	4992	4561	5373	3039	3615	4207	4047	5262	4224	3811	3176	2920	3043	3697	8552
Cyp2e1	-6.24843	0.831972	2.96393e-07	1	0	0	0	0	0	93	148	146	142	101	112	2	32	40	0	0	1				Aspdh	-5.53706	0.931062	1.0217e-05	0	0	0	0	0	0	24	17	14	42	46	44	0	0	0	0	0	0	0	0	29
Card10	1.39794	0.24193	2.99043e-07	5032	4660	4118	3243	4685	4223	2427	2493	2642	1416	1643	1775	2538	2398	2566	3729	3026	2752				Slc39a13	1.77625	0.346844	1.0276e-05	933	776	787	734	1006	880	348	269	316	174	162	193	296	309	266	297	174	139	664	959	283
Prkca	-1.51758	0.256037	3.05063e-07	1815	2144	1704	1745	1332	1309	5835	5907	5818	6098	6564	6880	5057	5533	6347	4542	4124	4880				Fgd3	1.99619	0.364949	1.04355e-05	2204	2076	1730	1990	2961	2416	188	209	137	116	178	153	1464	814	317	788	668	752	2837	1368	180
Mthfd2	-1.48012	0.260323	3.06325e-07	1095	1144	1189	1916	1427	1053	1849	1950	2136	1891	1991	2333	3195	3034	1557	1210	1142	1092				Hspd1-ps3	-1.20716	0.240609	1.04355e-05	3952	3913	4931	6088	5979	5177	9054	9434	10652	7398	8112	9688	7736	10393	6449	8367	7145	6750	6540	6864	11290
Mamstr	5.05289	0.703499	3.10285e-07	20	23	18	11	12	10	1	2	0	0	2	0	0	2	8	5	7	4				Dsc2	-1.07505	0.213939	1.06605e-05	7001	7155	6284	7346	6864	6716	9607	10309	10230	11028	11994	12318	15802	14808	12656	17900	15985	16576	8285	5838	11561
Nqo2	-1.0178	0.177127	3.18997e-07	450	477	374	479	577	528	1094	1189	1169	867	1029	1032	853	877	911	917	840	772				Cenpu	-1.71516	0.33994	1.07332e-05	111	142	177	215	231	188	391	393	394	265	328	407	418	665	309	473	413	363	133	206	467
Zfp334	3.09399	0.478681	3.24999e-07	371	340	335	148	265	226	44	54	52	25	30	30	86	29	67	84	87	51				Usp12	-1.40791	0.277915	1.0805e-05	817	874	741	928	767	684	2030	2185	2027	2832	2845	2933	2127	2279	2069	2818	2441	2336	972	906	2731
Kifap3	1.00484	0.176734	3.25308e-07	1228	1243	919	905	978	954	740	758	799	511	555	616	813	831	864	996	827	800				Pcna-ps2	-1.35701	0.270288	1.08159e-05	888	1047	1163	1464	1637	1429	2509	2475	2408	2257	2364	2598	2574	3591	2167	2903	3229	3037	1263	1612	2663
Gm15292	-6.69386	0.854635	3.2844e-07	0	0	0	0	0	0	37	105	108	189	156	187	19	40	122	0	0	0				Clca4c-ps	-5.12776	0.836328	1.0907e-05	1	6	3	0	1	0	158	125	169	836	871	691	180	108	435	320	332	374	1	4	437
Def6	4.93801	0.595469	3.29822e-07	391	382	227	573	840	841	11	12	9	11	14	10	7	11	13	15	1	1				Hexb	-1.80766	0.333469	1.09245e-05	826	813	657	644	558	533	3405	3645	3438	2967	3169	3241	563	763	1966	2497	2533	1041	376	559	4625
Bbox1	-7.26786	0.843246	3.3144e-07	0	0	0	0	0	0	43	63	68	129	139	186	3	2	4	10	0	1				Gm12320	-3.73152	0.675157	1.09765e-05	2	4	1	3	5	6	187	170	152	148	138	158	51	108	116	108	62	29	2	3	48
Cym	7.47073	0.610641	3.32079e-07	13625	8496	7097	2125	8612	21944	11	14	13	34	29	30	5	4	2	0	0	0				Myrip	-5.31863	0.846018	1.09882e-05	3	0	0	2	0	1	120	105	175	45	60	61	46	76	188	8	15	9	0	0	114
Zfp532	4.86067	0.676782	3.37837e-07	519	520	616	66	283	401	48	51	25	1	2	3	3	4	14	9	11	6				Ddhd1	-1.03177	0.210999	1.11859e-05	1425	1372	1625	1686	2159	2085	967	1016	1058	1246	1409	1265	3741	3203	1247	1403	1047	1082	1148	1489	1269
Mgat3	1.57304	0.275153	3.40067e-07	8474	9747	5802	5163	6710	6285	3908	4639	3961	4400	4087	4177	3005	2445	5231	5618	5357	5088				Use1	1.25223	0.253942	1.12402e-05	2516	2421	1419	1479	1463	1419	2376	2923	2760	1618	1824	1865	1420	1547	2323	2282	2086	1847	2653	2487	2460
Gm17783	-7.2594	0.857106	3.42511e-07	0	0	0	0	0	0	700	716	677	102	81	105	84	100	321	0	2	1				Col27a1	3.92723	0.747395	1.13138e-05	7877	6329	5762	1450	2064	1733	65	100	173	12	19	22	20	22	14	5	3	5	1891	4112	107
Ltk	3.02888	0.479411	3.50536e-07	552	579	290	299	362	404	105	131	137	31	69	46	42	32	55	23	19	16				Homer2	1.28439	0.255155	1.13634e-05	8499	9209	6853	7970	8390	7993	4838	5272	5547	3670	3645	4412	1597	2528	2383	2447	1893	1398	15399	11971	6525
Zfp30	3.41344	0.55734	3.52338e-07	194	146	160	53	110	126	35	64	44	15	13	19	17	24	51	2	18	18				Vmac	1.62806	0.33355	1.14092e-05	691	739	655	463	557	652	585	611	648	268	248	282	201	236	428	496	374	321	431	655	397
Pxdc1	-2.63477	0.446157	3.53153e-07	298	238	194	258	432	311	448	521	368	932	867	859	500	159	115	377	282	311				Kcnn1	2.33729	0.466431	1.16073e-05	157	132	75	77	62	117	15	25	17	9	9	18	18	22	30	38	40	27	70	94	31
Spp1	9.60915	0.769815	3.54057e-07	201174	179239	133617	149094	199910	155576	29	99	2	2	4	8	45	29	4	3582	434	144				Npl	-4.26904	0.72703	1.17193e-05	16	19	8	12	12	13	85	100	64	433	375	257	13	15	27	8	13	9	8	11	279
Kif5c	4.08767	0.613809	3.54912e-07	29	42	25	54	43	40	6	6	5	5	4	1	5	2	26	19	23	7				Entpd7	-1.88279	0.38494	1.1877e-05	538	516	582	666	843	662	878	999	977	1921	2100	2131	686	709	384	529	385	359	527	534	852
Evl	3.77093	0.565574	3.65058e-07	798	941	742	684	1374	1299	183	251	111	55	62	57	19	83	79	2	1	2				BC030870	-3.44229	0.619138	1.19415e-05	21	11	55	5	12	28	1204	1187	1298	1831	1707	1852	485	530	814	1347	1254	839	88	37	1104
Acer1	-5.82867	0.81855	3.70918e-07	0	0	0	0	0	0	99	81	65	114	102	129	4	8	51	115	96	79				Defa36	-5.60836	0.820826	1.23972e-05	0	0	0	0	0	0	429	710	1115	967	659	826	66	161	1579	0	2	0	1	1	493
Tmem221	4.10173	0.57027	3.70934e-07	149	109	134	69	66	81	5	6	0	8	6	4	16	11	11	11	12	8				Kcnma1	-3.96094	0.703279	1.23972e-05	0	0	2	0	0	0	69	87	72	83	118	137	70	117	208	21	48	25	4	1	79
Aunip	-2.10338	0.359902	3.71831e-07	69	60	100	121	83	61	238	233	241	201	210	272	166	271	108	264	216	226				Scg2	-5.96092	0.783684	1.24681e-05	0	1	1	0	0	2	476	571	688	212	151	212	45	89	308	62	35	20	0	1	781
Nek7	1.43986	0.248194	3.73466e-07	3697	3920	2814	2380	2630	2921	1202	1305	1274	904	923	1027	1395	1243	994	4210	3172	3115				Zfp791	1.9326	0.374347	1.25232e-05	112	109	91	81	79	85	135	117	131	61	95	85	77	87	98	79	73	82	218	452	91
Ddx39	-1.74996	0.310986	3.86007e-07	1460	1498	1680	2510	3169	2064	2680	2857	2711	3170	3463	3921	5258	6867	2691	3439	2864	2949				Hook3	1.27106	0.255097	1.25286e-05	2211	2207	1756	1668	1850	1783	962	1090	1304	657	675	705	1001	845	1026	1595	1310	1173	1655	2273	1003
Marveld1	2.96703	0.495337	3.86653e-07	1925	1714	1562	1086	1071	1167	533	669	637	153	139	202	403	424	688	317	315	252				Krt4	4.16176	0.634186	1.26271e-05	2165	3326	2451	3032	1459	4336	59	105	38	152	384	178	23376	16384	4472	3878	2119	1493	26286	10023	100
Pgghg	1.32453	0.234744	3.97635e-07	1631	1697	1694	1396	1264	1197	1223	1307	1153	676	778	842	858	991	1225	947	862	938				Pycard	-2.50808	0.452882	1.2668e-05	579	664	191	364	188	340	4850	4778	4359	4357	5090	5689	1274	1705	3375	1946	2431	2029	347	541	5995
Bcam	3.73196	0.56786	4.12519e-07	14413	14854	10753	7321	8852	9923	1821	2269	2263	349	498	501	949	1060	1310	1048	755	371				Id2	1.8317	0.360298	1.27505e-05	3985	3920	3562	2495	2923	3534	619	792	606	654	836	798	1169	1317	1164	472	423	197	3864	3654	1339
Anks4b	-3.64263	0.524414	4.16495e-07	152	311	187	465	284	201	2573	2752	2853	5861	5623	5724	1636	1651	2693	3127	3384	3125				Hmga2	1.54817	0.318299	1.28011e-05	953	958	1406	1203	1221	1276	1221	1195	1127	618	661	674	456	707	1118	1928	2246	1831	2561	3320	2000
Zfp324	1.19909	0.212704	4.32302e-07	555	488	398	370	462	454	330	357	370	211	245	260	237	252	299	295	311	311				Insl6	-2.62239	0.495458	1.28011e-05	20	19	18	10	23	11	261	306	212	384	414	409	207	163	355	218	274	189	15	19	215
Adam15	1.23845	0.219776	4.57525e-07	2349	2394	2034	1313	1867	1824	1389	1365	1147	995	1018	1224	1099	1307	1436	2202	1989	1570				Fabp5	3.13672	0.555931	1.28102e-05	1339	2010	1436	777	940	693	188	320	259	452	399	443	103	208	118	74	92	86	14823	5986	601
Msn	4.59372	0.546471	4.57525e-07	4666	3470	4839	5755	9753	8038	11	20	3	41	80	31	2864	1286	227	3615	2459	1757				Usp1	-1.32676	0.266773	1.28784e-05	1021	1259	1193	1722	1587	1495	3144	3470	3520	2498	2738	3093	3258	4523	2505	2894	2885	2788	1589	2232	3386
Urad	-5.64854	0.813072	4.62695e-07	0	0	0	0	1	0	116	118	82	57	67	85	19	18	58	2	20	27				Tuba1b	-1.57367	0.313073	1.28846e-05	658	800	1026	1103	1412	1058	1531	1615	1584	1065	1246	1516	1505	2201	1197	1536	1417	1566	685	840	1874
Cracr2b	1.19937	0.213226	4.66638e-07	994	1042	747	884	731	964	604	722	651	438	494	536	736	844	1035	786	577	511				Abhd4	1.2751	0.252761	1.29416e-05	5815	5313	5252	5350	6545	6353	2017	2149	1908	2502	2506	2318	3225	2286	2920	4648	3968	4230	5554	5404	2352
Zfp516	1.32975	0.23053	4.66737e-07	2032	2047	2244	1876	2150	2161	817	815	655	677	781	757	1269	780	960	852	692	598				Dis3	-1.04609	0.211779	1.29748e-05	1223	1222	1208	1463	1523	1385	2138	2099	2302	1494	1708	1910	2480	3210	1615	1932	1631	1688	1551	1583	2035
Btnl1	-8.91585	0.824225	4.68485e-07	0	0	1	0	0	0	1633	1747	1720	4319	3850	4338	15	59	497	11	156	275				Dsc3	6.64744	0.920236	1.29748e-05	1	0	0	1	6	0	4	2	2	6	0	3	2	4	4	1	2	1	142	173	1
Fyco1	1.24118	0.219378	4.69379e-07	3499	3666	4098	3205	2519	2924	2037	2027	2083	1510	1650	1682	1813	1639	1939	2710	2516	2423				Gata5	1.38279	0.267285	1.3099e-05	4700	4901	4245	4699	7003	6920	1546	1775	1999	1548	1697	1698	2778	3205	2341	2	4	0	4194	6186	1478
Frmpd1	5.00193	0.607902	4.90129e-07	356	280	150	81	294	240	5	4	4	5	2	5	15	8	5	3	8	3				B4galt5	-1.73027	0.331118	1.31562e-05	371	304	479	274	349	281	2214	2436	3018	2484	2583	2689	1170	1352	1961	2106	1933	1751	350	479	3515
Agtrap	1.18859	0.21017	4.93017e-07	1895	1809	1581	1475	1697	1662	1082	1069	1013	630	726	741	990	1047	969	1491	1341	1067				Gm13991	1.05419	0.213753	1.32951e-05	534	566	468	353	432	379	261	288	312	211	224	266	242	189	294	405	336	314	301	406	269
Cisd3	-2.03143	0.338686	4.96791e-07	279	373	276	435	359	338	1370	1461	1259	1683	1798	2130	929	1275	1411	1888	1609	1614				Zfp383	1.79477	0.367417	1.32984e-05	239	219	236	125	138	180	116	130	115	53	64	60	59	92	108	101	113	73	134	200	89
Cpne4	5.44842	0.67927	4.99428e-07	137	93	209	212	416	640	2	6	8	6	5	8	0	3	15	6	0	4				Rab3c	-5.73549	0.877959	1.33096e-05	1	0	0	0	0	0	233	264	447	93	97	102	17	54	137	4	16	5	0	0	297
Chad	6.27525	0.589684	5.00685e-07	374	398	207	300	334	284	10	8	5	0	0	0	0	2	0	0	0	0				Arhgap31	-2.08129	0.412367	1.33842e-05	8	2	4	14	6	4	243	294	299	298	322	323	429	413	567	334	187	169	29	34	139
Cd59a	4.62495	0.63307	5.07111e-07	112	107	19	20	28	46	11	8	6	0	0	1	0	0	2	0	0	0				Zc2hc1a	1.83036	0.361537	1.34505e-05	443	413	447	370	508	464	183	139	195	109	98	76	189	151	156	276	190	186	306	447	131
Usp1	-1.53737	0.270309	5.15548e-07	1021	1259	1193	1722	1587	1495	3144	3470	3520	2498	2738	3093	3258	4523	2505	2894	2885	2788				Rap1gapos	2.02627	0.404514	1.35124e-05	78	67	69	100	71	68	36	41	44	19	31	24	18	13	41	6	6	8	90	142	56
2810459M11Rik	1.87814	0.350816	5.22334e-07	1108	1264	805	567	593	604	1082	1136	962	734	879	874	51	167	453	774	527	470				E2f8	-1.9865	0.400882	1.36268e-05	381	559	769	1044	915	732	2617	2436	2327	1541	1762	2318	2499	3940	1526	2070	1674	1774	724	1111	2682
Cd164l2	4.02438	0.598481	5.23031e-07	144	128	89	22	36	33	18	24	18	6	4	8	2	4	11	5	3	2				Gm609	-5.58827	0.807692	1.3668e-05	9	7	13	0	1	0	949	663	831	175	189	177	163	353	662	10	13	6	0	3	859
Cox20	-1.1271	0.199489	5.25301e-07	209	233	224	220	180	194	496	425	444	404	408	470	433	528	378	351	349	352				Gip	-7.13255	0.868875	1.37236e-05	0	1	0	3	0	0	3343	3235	5062	1030	466	598	2	25	188	0	5	3	1	0	2484
Polr3g	-1.06447	0.190975	5.28496e-07	629	644	592	801	848	705	916	948	968	973	1049	1016	1020	1241	707	1326	1185	1096				Angptl2	5.90273	0.756129	1.38191e-05	1403	953	1814	1411	2437	2133	0	0	0	0	4	0	12	11	2	74	18	10	332	672	1
Esam	2.29597	0.373509	5.48381e-07	551	494	774	863	577	577	106	122	119	106	102	165	124	129	115	8	21	13				Oprd1	2.87462	0.556593	1.39327e-05	43	49	41	62	32	47	4	6	5	5	3	1	8	17	18	8	12	5	52	42	7
Sptb	3.41415	0.586943	5.55997e-07	99	79	113	54	69	96	55	51	86	15	8	9	8	11	73	1	1	0				Fkbp5	-2.97194	0.595786	1.40292e-05	78	118	138	241	313	199	341	389	404	1084	1379	1165	2575	2425	1503	2178	2728	3283	183	198	1285
Lypd3	5.01847	0.634135	5.58106e-07	214	156	116	98	116	90	1	0	3	4	1	7	16	4	8	1	3	3				Pgghg	1.1011	0.225417	1.40862e-05	1631	1697	1694	1396	1264	1197	1223	1307	1153	676	778	842	858	991	1225	947	862	938	1279	1806	1259
Rnf103	-1.39183	0.245963	5.58106e-07	1688	1786	1404	1530	1580	1560	2515	3143	2757	3671	3567	3606	3492	2926	2364	2889	2673	2925				Slc5a5	5.50672	0.854735	1.40862e-05	364	715	77	79	91	322	2	4	0	8	6	3	18	11	6	15	7	10	204	350	2
A930004D18Rik	3.57792	0.504357	5.71255e-07	136	179	172	105	211	194	5	9	0	6	5	4	43	38	10	57	44	31				Mylk3	-5.90122	0.814283	1.40915e-05	1	1	0	0	4	1	413	392	382	203	180	242	18	21	30	0	1	0	0	1	245
H2-T3	-7.49409	0.832397	5.75548e-07	0	0	0	0	0	0	1326	1518	1653	958	770	1023	4	23	346	2	47	76				Gm12470	3.58946	0.610995	1.41697e-05	19	26	30	14	26	23	11	9	8	1	3	6	0	3	3	0	0	1	35	83	9
Eml2	1.22388	0.215837	5.76148e-07	3822	3560	3854	3479	3957	3739	1688	1916	1472	1283	1570	1606	2818	1765	2308	4001	3342	3332				Hspa14	-1.07616	0.218403	1.43815e-05	1153	1201	1226	1556	1823	1565	1390	1544	1400	1419	1554	1849	1666	2126	1286	1790	1635	1675	1138	1281	1633
Hook3	1.51	0.266621	5.97154e-07	2211	2207	1756	1668	1850	1783	962	1090	1304	657	675	705	1001	845	1026	1595	1310	1173				Nup107	-1.03788	0.211166	1.45767e-05	1349	1359	1645	1964	2161	1839	1865	1940	1778	1567	1806	2105	2638	3027	1752	2304	1850	1842	1449	1966	2225
Psmb10	-1.28673	0.220515	5.99144e-07	444	488	425	392	346	395	1941	2134	2172	1973	2027	2221	1026	1410	2425	2181	2283	2761				Ltc4s	2.64296	0.533303	1.47009e-05	158	118	109	152	180	141	113	123	107	50	33	36	24	20	71	10	3	6	146	88	47
Traf1	4.58463	0.631252	6.04753e-07	84	68	61	35	74	93	5	7	6	0	0	0	2	8	5	14	15	8				Nadk2	-1.39282	0.27286	1.4756e-05	1291	1337	1313	1330	1118	1176	8623	9165	8578	4184	4306	5290	2406	2705	3267	1390	1207	1092	1440	1864	7014
Zfp825	1.09394	0.1975	6.20125e-07	393	392	400	307	276	340	303	301	306	246	224	231	174	209	261	211	186	182				Mttp	-4.30777	0.680003	1.47663e-05	858	760	441	294	381	551	23512	25887	22845	66716	66418	65836	279	657	3880	208	214	171	356	773	32573
Fkbp1b	3.51703	0.562832	6.33849e-07	65	44	33	21	33	24	6	3	8	5	2	5	11	16	23	22	8	15				Tamm41	-1.08169	0.218617	1.48452e-05	454	432	428	523	565	501	726	807	849	575	611	889	612	792	521	818	591	511	453	505	857
Xbp1	1.35522	0.240072	6.37316e-07	15767	15220	17921	12140	10836	13201	6985	7371	6661	6495	7058	7357	4998	4332	5695	5645	4645	4100				2610528A11Rik	-4.50734	0.772433	1.49027e-05	2	7	14	15	12	0	2692	2846	1226	4272	4609	3926	4215	2103	9498	21115	30146	25850	59	11	5653
Tph1	-4.54083	0.566835	6.76879e-07	9	7	3	0	7	5	1096	1186	2067	457	384	480	57	166	639	75	90	39				Abhd14b	1.14947	0.235506	1.51563e-05	1778	1897	1483	1121	980	1045	2015	2034	1771	1400	1544	1587	732	773	1234	1952	1807	1552	1953	1916	1707
Amer2	3.93658	0.593683	7.02188e-07	164	161	103	28	93	88	32	22	30	2	3	4	0	0	2	6	4	3				Syt13	-4.15516	0.698257	1.52844e-05	1	2	0	1	0	1	139	165	222	59	72	91	20	53	106	9	8	2	4	0	206
Alpi	-8.65705	0.73381	7.064e-07	4	39	26	1	0	0	47615	52170	40165	31067	27820	31168	161	329	1004	1297	1509	1777				1810043G02Rik	1.54129	0.306939	1.53668e-05	625	617	457	472	413	479	201	240	193	116	119	139	184	145	138	264	182	214	522	566	187
Cd83	-5.6111	0.737078	7.08308e-07	0	0	1	0	0	2	364	372	391	104	95	118	19	40	122	9	16	8				Gemin8	1.72154	0.350178	1.53668e-05	259	242	222	189	171	252	99	116	93	40	52	55	90	87	114	92	83	62	202	335	116
Rab32	-1.03562	0.189336	7.09797e-07	301	290	292	327	376	374	280	328	288	337	384	371	622	684	297	1149	964	876				Hmgn3	2.94614	0.586844	1.54128e-05	501	610	325	189	211	206	94	130	149	42	38	25	0	4	2	0	7	1	372	391	106
Psca	5.68308	0.635184	7.16891e-07	5690	6898	2165	11622	15490	13811	11	36	18	107	122	80	2963	1930	1626	59	49	41				Tkfc	-3.43454	0.616021	1.55428e-05	921	842	987	796	892	899	17462	18230	18080	59537	56899	61398	2800	3526	9491	1862	1503	1026	961	938	21304
Grhl2	1.06458	0.192208	7.25662e-07	3111	3123	2969	2431	2718	3032	2263	2204	2054	1329	1431	1671	1987	2195	2232	3030	2623	2318				Urad	-5.50662	0.874549	1.57706e-05	0	0	0	0	1	0	116	118	82	57	67	85	19	18	58	2	20	27	0	0	243
Wipf1	-2.42927	0.397274	7.25662e-07	123	119	183	85	112	113	672	663	572	860	850	996	811	986	972	899	1010	1386				Gm5620	-2.26506	0.444768	1.57778e-05	24	30	27	37	49	33	71	56	59	30	53	62	48	58	37	53	40	46	13	32	77
Ctsf	3.47338	0.570725	7.26568e-07	1385	1000	662	291	393	586	181	246	273	63	75	36	76	54	154	250	275	218				1700066B19Rik	2.10474	0.415793	1.59056e-05	1126	1146	1136	2060	1800	1453	349	459	321	203	293	262	544	485	631	1223	1056	969	938	2300	362
Inka2	2.67876	0.420658	7.27008e-07	495	413	408	370	650	651	19	40	75	33	49	45	328	263	162	239	175	124				Herc3	-1.13936	0.22858	1.59056e-05	694	690	596	449	502	544	1861	1802	1603	1587	1798	2015	1875	1590	1745	1645	1472	1275	622	1011	1996
Slbp	-1.17017	0.210059	7.33357e-07	714	764	822	870	941	832	1651	1759	1862	1258	1420	1514	1606	2204	1323	1549	1422	1413				Dnajc18	1.04249	0.211695	1.59864e-05	929	903	823	810	711	826	427	444	466	286	301	337	408	434	449	512	404	470	717	792	363
Arhgef10	2.93933	0.479929	7.38774e-07	1465	1656	1063	1020	1074	1063	318	340	350	104	112	122	336	269	298	120	178	187				Ctss	-3.47457	0.589006	1.61057e-05	3	0	2	1	0	1	1159	1486	1554	1478	1279	1364	401	641	1952	3575	3963	3924	3	29	1476
Calr3	3.34208	0.536266	7.38774e-07	487	502	257	296	166	166	73	100	82	30	27	25	40	32	58	52	28	36				Olfm4	-6.37494	0.966642	1.61218e-05	1	0	1	19	43	8	31350	39164	53331	26952	24780	35173	322	1366	5496	1	40	36	52	43	36337
Fbxo10	2.41811	0.425859	7.45179e-07	473	465	380	176	275	305	192	221	176	88	65	109	101	112	170	97	115	136				Slc17a9	2.75037	0.549874	1.62834e-05	900	956	424	394	282	319	108	88	52	69	92	66	1756	996	1129	4715	3957	4608	1215	1133	281
Defa32	-8.1481	0.856065	7.61559e-07	0	0	0	0	0	0	494	844	889	2047	1528	1814	612	1412	12339	0	5	0				4932411K12Rik	7.30308	0.860137	1.62976e-05	106	131	160	300	261	150	0	0	0	0	0	0	0	1	0	2	2	0	220	418	0
Ahcy	-1.71663	0.300647	7.6704e-07	294	300	422	521	522	455	1372	1339	1094	1021	1129	1268	905	1166	870	1383	1269	1283				Prkab1	1.69484	0.338746	1.67566e-05	6088	5746	4278	3719	3862	4047	3229	3105	2291	1548	1854	1748	4453	4285	3172	5342	4803	5174	5516	9103	2439
Megf8	1.21511	0.216465	7.71872e-07	3903	3568	4031	2720	3800	4125	1559	1784	1584	1418	1673	1636	2055	1518	1783	2899	2657	2477				Gprc5b	3.00537	0.52843	1.67855e-05	1060	1015	2121	2287	3149	1923	47	51	37	17	41	27	85	75	28	7	12	11	411	683	22
Abhd1	-2.0787	0.349279	7.71902e-07	70	75	66	39	54	42	248	317	224	336	314	336	106	100	120	163	150	129				Gm5478	7.23822	1.01052	1.68299e-05	1	0	0	0	0	0	2	3	0	0	0	1	22	22	6	1	2	1	502	61	0
Mab21l3	3.56753	0.569679	7.76606e-07	569	371	637	110	118	321	102	118	46	50	42	38	78	72	202	17	15	10				Gm7334	1.066	0.211661	1.7087e-05	354	345	338	342	436	359	46	73	63	56	60	72	160	166	88	114	84	87	291	264	93
Fam49a	3.19897	0.556843	7.82586e-07	832	880	661	732	672	524	264	314	408	57	64	89	40	145	193	49	48	31				Wls	1.47535	0.300568	1.72526e-05	7588	7053	8812	7153	8519	8788	2855	2927	3043	1730	1975	1946	6747	5617	5656	9484	7689	7517	5992	8369	4122
Pou6f1	2.86316	0.477202	7.8697e-07	566	518	519	253	336	443	105	154	148	33	52	61	189	142	204	352	320	296				Sh3yl1	1.18997	0.241324	1.72764e-05	1740	1866	1571	1481	1413	1614	916	1041	950	1159	1057	1020	1047	765	1163	1968	1647	1569	1629	1890	951
Vnn1	3.75645	0.59178	7.90286e-07	6487	5767	1826	2393	3999	5668	741	1161	1490	285	303	252	161	179	445	61	98	19				Pinlyp	5.67663	0.875063	1.75612e-05	169	165	40	71	101	56	4	0	0	3	3	6	3	0	5	2	2	4	205	53	0
Fbxw4	1.19121	0.215116	7.92627e-07	622	595	523	494	551	632	346	376	368	286	327	382	316	252	406	539	452	578				Hsp25-ps1	5.03792	0.786339	1.77257e-05	94	76	28	26	46	34	0	3	2	0	1	0	11	4	2	9	14	7	287	94	2
Hdhd3	-2.12804	0.348861	7.97473e-07	151	161	110	101	123	134	880	915	812	1092	1255	1158	216	313	532	555	567	431				Insl3	3.78762	0.749458	1.77257e-05	24	20	46	9	4	12	1	3	4	0	0	1	1	2	6	4	6	7	21	56	4
Arhgap8	1.87091	0.332082	8.07295e-07	870	979	911	744	854	812	594	538	484	317	371	367	169	238	329	57	94	26				Tmem158	2.79104	0.52345	1.77378e-05	735	745	469	445	276	327	45	56	40	37	36	45	181	76	84	45	71	110	618	704	58
Zfp697	2.86617	0.465866	8.07295e-07	770	556	468	408	1032	952	128	159	191	83	68	74	167	157	191	124	126	140				Btbd19	1.59443	0.300743	1.81143e-05	457	478	627	591	916	840	96	101	97	124	112	124	292	228	100	207	147	127	955	771	104
AC130529.1	8.20976	0.765815	8.31647e-07	421	538	590	698	857	924	0	0	0	0	0	2	0	0	0	2	1	0				Pla2g2f	-5.73758	0.809205	1.81143e-05	1	0	0	9	4	1	230	194	230	248	218	250	52	151	358	75	56	24	1	0	298
Rab3c	-6.01195	0.813342	8.32161e-07	1	0	0	0	0	0	233	264	447	93	97	102	17	54	137	4	16	5				Myh6	4.03921	0.88302	1.83774e-05	5	13	2	13	8	24	2	6	6	3	0	2	0	1	14	0	2	0	138	26	11
Homer2	1.29179	0.232581	8.55901e-07	8499	9209	6853	7970	8390	7993	4838	5272	5547	3670	3645	4412	1597	2528	2383	2447	1893	1398				Sgcd	6.18272	0.95646	1.84594e-05	215	212	247	39	52	74	0	0	0	0	0	0	0	0	0	7	4	0	94	180	0
Cd68	3.6641	0.516338	8.68968e-07	2467	1847	1815	1714	1036	1193	81	94	46	45	74	65	339	86	77	142	163	215				Mgat3	1.85261	0.375864	1.87123e-05	8474	9747	5802	5163	6710	6285	3908	4639	3961	4400	4087	4177	3005	2445	5231	5618	5357	5088	12253	5404	3970
Thnsl1	1.28006	0.229405	8.75421e-07	975	872	1066	784	766	978	466	469	436	399	398	388	594	436	558	703	632	572				Car2	3.04602	0.52871	1.87433e-05	24040	31069	14035	18012	13774	12649	601	896	654	1029	985	829	3741	1926	543	86561	72286	50864	39837	12498	1037
Fam107b	1.60112	0.279919	8.80258e-07	9970	10055	7772	11183	13894	10719	3447	3864	4207	2228	2548	2888	5320	4522	4094	5845	5099	5133				Sval1	-5.40767	0.861983	1.88747e-05	0	0	0	0	0	0	46	29	56	49	80	51	48	95	474	290	275	114	0	0	264
Brdt	2.58287	0.445083	8.99754e-07	59	54	42	35	48	27	14	17	23	10	14	17	18	11	38	8	8	8				Cxadr	1.34142	0.272048	1.89706e-05	18390	18775	18156	15283	14068	14096	6439	7706	8250	8228	8611	7855	9139	6254	8927	7593	6574	5717	14429	18370	8597
Plcxd2	-2.15739	0.378688	9.13832e-07	213	220	312	408	356	293	538	522	680	973	980	912	924	723	526	869	738	655				Bicdl1	1.67094	0.328386	1.90302e-05	1093	1179	613	668	875	1017	366	320	369	444	419	325	340	332	248	526	438	507	1216	1269	285
Phlda3	2.18387	0.359795	9.21046e-07	2193	1950	2177	2216	3815	3093	203	304	389	318	433	358	1571	1136	951	1549	1206	859				4933412E12Rik	2.11823	0.430888	1.92514e-05	135	122	78	57	96	82	26	30	25	23	23	27	28	15	38	18	31	28	53	68	24
Pcdhgb4	3.89267	0.657341	9.27846e-07	107	51	69	10	75	32	25	19	24	6	1	7	2	2	49	12	14	1				Ldb3	-3.33701	0.620733	1.95075e-05	52	43	29	16	13	17	725	684	521	1653	1629	1497	738	944	1337	182	185	128	29	25	413
Gm16505	5.04364	0.648692	9.28558e-07	264	260	138	96	70	108	4	2	7	0	3	3	18	9	9	26	9	6				Gm14752	-1.62301	0.331788	1.95382e-05	45	86	93	97	113	89	137	146	124	132	170	186	169	220	123	152	173	139	75	91	188
Syt11	2.35835	0.41476	9.53225e-07	431	373	379	169	202	236	142	143	137	87	71	77	35	62	61	167	141	113				Nxf7	-5.16374	0.918823	1.96908e-05	0	0	0	2	0	0	26	72	15	45	51	41	94	230	107	0	0	0	0	0	83
Zdhhc15	3.57325	0.642906	9.79574e-07	670	657	1079	420	995	1260	267	289	365	32	49	29	11	80	165	33	64	54				Dnaaf1	-3.69969	0.667485	1.99249e-05	8	7	3	4	4	5	64	67	46	88	93	118	11	15	26	44	24	18	1	7	84
A930038B10Rik	-3.20777	0.500485	9.91255e-07	35	21	20	25	31	28	169	165	156	358	295	378	51	49	60	43	28	23				Prr15	-2.75912	0.508253	1.99696e-05	166	173	276	207	210	222	1008	1076	892	1915	1844	1785	1052	993	2670	2473	2369	2136	60	60	969
Eif1ad	-1.35539	0.246559	1.00317e-06	1052	1082	1111	1224	1483	1424	1846	1827	1882	2172	2371	2446	1969	2605	1475	2315	2190	2100				Fads6	2.47921	0.487725	2.0007e-05	659	602	478	424	474	524	128	141	148	34	46	74	55	52	60	29	9	25	523	538	96
Tmem38b	1.67356	0.294099	1.00395e-06	969	1003	985	630	603	817	224	297	242	254	309	284	373	350	335	525	446	420				Slc2a2	-6.37139	0.941765	2.0226e-05	0	0	0	2	0	1	1574	2086	2220	10847	8681	9980	8	13	107	0	1	1	0	2	1797
Htra1	4.6319	0.662059	1.01007e-06	217	166	212	18	82	72	16	10	8	3	2	2	12	22	25	2	2	0				Gm47742	-1.2747	0.262148	2.06748e-05	71	60	68	72	75	84	128	107	107	106	97	124	97	116	67	108	86	65	74	80	121
Sox7	7.53035	0.772052	1.01423e-06	212	177	131	55	92	172	0	0	0	0	1	0	1	2	0	0	2	0				Nkx2-2	-5.67717	0.890226	2.08529e-05	5	0	0	1	0	0	284	358	424	77	82	127	16	56	87	8	2	7	0	0	251
Adgrg1	1.87689	0.326383	1.03008e-06	9540	9408	9691	6053	7869	7678	2919	2927	3053	1455	1742	2065	2122	2691	1669	3591	2857	2642				Smc2	-1.84104	0.376526	2.10388e-05	991	1294	2060	2499	2375	2160	3455	3361	3547	2924	2995	3529	3997	5759	2852	3995	3424	3494	1169	1991	3388
Fmo1	-5.43308	0.811145	1.05089e-06	0	0	0	0	1	0	59	81	34	46	56	61	7	5	23	3	4	2				Ugt2b37	-5.83966	0.940266	2.17502e-05	0	0	0	0	0	0	12	11	16	20	32	36	0	0	0	0	0	1	0	0	51
Samhd1	-1.08028	0.19382	1.05458e-06	1265	1198	1043	1371	1334	1481	4064	4079	3928	3181	3133	3773	1497	1876	2192	1733	1420	1518				Zfp667	1.32037	0.276848	2.19656e-05	222	190	165	165	190	182	73	79	51	53	57	36	57	45	89	168	197	161	140	165	117
Pfkfb4	-1.69336	0.282763	1.06037e-06	410	404	236	262	252	234	3115	3196	2620	2817	2842	3005	185	254	713	541	537	394				Tmc3	4.84497	0.803304	2.20779e-05	80	55	29	20	26	41	5	12	4	2	1	1	3	0	2	5	5	4	204	30	2
Lamc1	1.30961	0.227742	1.0763e-06	8526	8400	12550	9171	10660	10564	1621	1945	1632	1875	2285	2057	5154	4604	2140	3257	2188	2517				Tctn1	1.56183	0.315771	2.20851e-05	1276	1292	1070	670	928	969	287	358	347	243	298	277	620	469	392	654	524	447	673	1067	307
Ctsl	2.19208	0.366362	1.07799e-06	15875	13746	10546	13133	19101	17706	1694	2066	1793	2823	3034	2735	5870	3750	4385	8967	7249	6331				Alpl	3.60575	0.760188	2.22849e-05	288	262	283	97	105	322	28	12	39	5	3	5	2	1	3	0	2	15	115	229	26
Abhd3	-3.30494	0.502118	1.08301e-06	123	157	77	230	166	157	1739	2182	2145	2870	2572	2731	622	573	1069	15	31	56				Depp1	3.7942	0.78019	2.24142e-05	5900	6306	2253	1748	1255	1202	422	582	353	45	74	49	168	49	185	253	143	106	4344	2285	176
Haghl	1.20352	0.214669	1.08776e-06	1893	1661	1589	1263	1833	1396	543	630	466	468	574	531	796	800	509	917	890	753				Anxa3	2.1235	0.396542	2.2818e-05	21185	19150	18106	19833	23934	24904	1080	1393	1009	2343	3293	2168	18065	12283	5962	14208	10802	8903	20568	18167	1694
Dagla	1.31455	0.238533	1.09409e-06	867	900	1010	733	753	901	516	558	565	462	493	438	399	419	572	166	152	85				Abcc4	1.15184	0.230538	2.28274e-05	4364	4112	3980	4366	4130	4591	895	1081	1136	960	1359	1129	3993	3278	1878	5489	4372	4376	6472	3967	1194
Dennd5a	1.69552	0.297691	1.09577e-06	878	840	781	627	1117	1078	263	266	382	199	257	266	574	484	520	337	234	274				Cyp2j5	-5.8771	0.933979	2.28465e-05	2	0	1	1	1	1	20	18	40	22	22	6	2	1	0	0	3	5	0	0	61
Vasn	2.89238	0.460294	1.10091e-06	965	970	1243	766	1229	1177	198	206	158	52	73	105	137	117	85	109	111	112				Il17re	2.84537	0.595819	2.28831e-05	2417	2322	1560	971	1223	1271	420	472	408	96	130	84	870	656	624	746	633	512	1898	1742	436
Ano9	-1.41518	0.250507	1.11694e-06	2175	2496	1882	1755	1503	1644	5983	5959	6080	6371	6637	7353	3526	4724	4500	3783	3447	3698				Gm48529	1.57197	0.310254	2.28839e-05	172	189	105	151	180	218	58	66	63	81	70	77	196	158	120	223	219	188	322	300	78
Mal	4.96213	0.586655	1.14029e-06	10487	12024	6602	5395	7496	7669	15	35	18	99	111	91	1292	806	176	1832	879	546				Kif5c	3.44298	0.697736	2.28839e-05	29	42	25	54	43	40	6	6	5	5	4	1	5	2	26	19	23	7	194	42	17
Mxd4	1.25675	0.229994	1.14414e-06	2972	3052	2203	1646	2515	2416	1562	1616	2003	1172	1325	1467	1190	1151	1513	2118	1822	1733				Cxcr4	4.39725	0.711872	2.31899e-05	281	256	405	309	327	376	9	6	24	2	3	4	1	8	1	0	2	1	141	608	10
Gm3054	-6.59406	0.847489	1.146e-06	0	0	0	0	0	0	90	68	46	260	213	184	17	10	92	279	190	308				Rab34	1.99795	0.394057	2.36666e-05	1141	982	1015	814	874	880	108	140	67	63	112	86	208	148	101	66	69	46	459	906	165
Meis1	7.28424	0.756729	1.16033e-06	325	311	247	227	205	156	1	1	0	0	0	0	3	4	0	21	21	3				Dhh	4.59313	0.70145	2.38503e-05	565	437	349	423	570	461	2	1	1	1	15	5	34	10	8	19	8	4	388	199	1
E2f8	-2.23166	0.396541	1.19212e-06	381	559	769	1044	915	732	2617	2436	2327	1541	1762	2318	2499	3940	1526	2070	1674	1774				Gm16054	-4.0012	0.732768	2.40882e-05	11	16	4	4	6	4	97	98	85	161	128	89	99	70	76	2	14	28	5	8	73
Lypd6b	3.91039	0.606617	1.2059e-06	367	617	136	109	108	93	37	32	38	15	10	12	19	26	28	45	32	26				Entpd3	2.81532	0.509322	2.46047e-05	1403	1206	1524	1591	2523	2584	66	61	69	31	41	38	949	516	147	75	71	46	887	1291	84
Syt13	-4.77263	0.683368	1.22186e-06	1	2	0	1	0	1	139	165	222	59	72	91	20	53	106	9	8	2				Fuz	2.73945	0.545644	2.47671e-05	1172	1116	854	743	678	686	451	510	318	139	151	149	165	222	328	233	240	281	718	1038	119
Ssx2ip	-2.13955	0.365113	1.22928e-06	602	581	588	572	829	731	2409	2551	2239	3772	3481	3931	1601	2221	2272	2782	2972	2730				Bora	-1.50276	0.309921	2.48665e-05	470	534	609	719	727	622	1361	1190	956	709	990	985	1606	1990	1021	1183	929	847	475	841	1503
Ankrd13d	3.15955	0.489979	1.25848e-06	257	240	232	150	169	200	30	25	18	2	25	15	45	38	27	59	38	39				Smcp	-5.75649	0.996844	2.48665e-05	0	0	0	0	0	0	3	2	3	41	26	27	0	1	0	1	0	0	0	0	56
Tlr1	-2.88565	0.490399	1.2995e-06	0	1	6	14	11	5	39	41	58	34	40	25	312	313	231	2135	2203	1779				Syne1	-2.26833	0.500979	2.49855e-05	35	29	47	94	63	41	20	27	21	58	72	61	748	432	113	595	480	428	28	72	55
Hcn2	1.87115	0.335878	1.30501e-06	759	818	991	915	734	900	333	416	311	391	391	401	284	198	500	743	801	775				Fam131c	2.7556	0.540147	2.49868e-05	217	191	113	109	153	136	21	31	29	5	20	21	48	22	33	25	20	9	190	183	36
Tdrkh	-2.72267	0.442783	1.39684e-06	15	18	18	22	15	16	172	183	244	114	148	186	160	65	179	83	64	95				Defa31	-5.94738	0.936503	2.4999e-05	0	0	0	0	0	0	171	196	221	563	395	457	20	31	234	0	0	0	0	0	214
Fscn1	5.76442	0.635195	1.39753e-06	590	451	508	591	2065	2257	1	7	8	6	6	2	54	21	11	2	3	3				Slitrk6	2.95454	0.546613	2.56204e-05	0	0	1	1	3	0	165	220	195	95	108	86	92	101	230	0	1	2	481	176	72
Gm11295	-1.99009	0.352783	1.4055e-06	36	53	61	77	78	56	139	163	133	177	193	212	91	96	71	133	134	113				Gm45716	-4.51241	0.748497	2.59074e-05	0	0	0	1	0	0	152	163	155	70	71	94	50	84	103	10	16	29	2	0	76
Gm38910	1.81612	0.323483	1.42647e-06	241	251	294	311	402	330	124	147	117	73	87	86	120	135	157	197	160	158				Zfp677	3.51273	0.76723	2.61373e-05	177	206	71	58	72	120	44	48	35	5	3	4	14	10	16	8	8	16	66	72	11
Dock11	1.73025	0.305989	1.43807e-06	4790	5082	4334	3710	3785	3992	1326	1721	1799	1115	1213	1307	1462	1964	1495	557	363	221				Mep1b	-4.73874	0.84088	2.62172e-05	31	39	1	81	19	14	4443	6376	5032	12452	12153	10523	1291	2201	5111	5040	4441	3462	122	19	4849
Paxip1	-1.17585	0.216744	1.45649e-06	1120	1227	1132	1274	1387	1180	2572	2441	2395	1715	1891	2175	2327	3266	1723	2240	2035	1874				Scin	-5.63717	0.888465	2.63653e-05	0	1	9	2	15	7	710	1218	1051	3792	3335	3317	29	81	569	263	307	486	8	9	3450
Fbxl20	1.40665	0.257327	1.45706e-06	4071	3997	3393	2343	2846	3130	1975	2129	2062	1342	1353	1588	1789	1363	1866	2249	1907	1668				Scg3	-5.38228	0.872663	2.66164e-05	2	0	0	0	0	0	105	107	93	35	38	43	9	17	32	5	4	3	0	0	178
Slc16a2	4.65729	0.608265	1.47166e-06	843	796	895	543	822	911	52	41	54	9	10	7	9	21	7	1	0	1				Sfxn3	1.91405	0.400302	2.67e-05	2620	2674	2081	1367	1422	1656	1223	1292	1070	510	647	603	1231	1003	1178	1839	1449	1246	1891	2481	900
Uqcrc1	-1.08672	0.199118	1.47166e-06	7535	7855	8307	8283	9023	8447	15658	16554	15391	17306	18214	20057	10173	11380	10959	14580	13025	11288				Tmem109	1.10553	0.229136	2.68267e-05	2288	2367	2128	1760	1655	1663	1549	1535	1433	995	1156	1304	1343	1820	1254	1926	1810	1798	2752	3043	1799
Urah	1.99357	0.360081	1.47191e-06	715	741	562	323	541	507	353	374	244	188	182	170	302	253	407	238	261	243				Faap24	-1.34249	0.2851	2.68465e-05	175	205	204	322	368	244	293	309	252	310	357	359	439	572	228	469	407	415	316	387	375
Aldh9a1	-1.34732	0.241902	1.4964e-06	2650	2885	2830	3547	2740	2134	9371	9754	8032	8318	9011	9926	4135	5063	5718	4098	3929	3647				Cdiptos	3.09525	0.627078	2.69777e-05	56	63	38	25	13	22	35	50	35	22	22	9	32	19	31	61	64	39	55	74	16
Cfi	4.15693	0.603221	1.50275e-06	5624	6550	7834	2411	2896	4825	774	856	717	120	157	185	47	31	61	8	3	2				Asb1	1.80879	0.358807	2.70517e-05	554	566	726	344	378	657	166	151	152	153	131	153	272	270	159	347	225	242	676	1017	189
Akap7	-1.19242	0.214337	1.51333e-06	608	579	582	774	569	545	2456	2431	2399	1707	1808	1883	1012	1216	1545	1712	1508	1393				Pnpla3	-3.77873	0.694383	2.72005e-05	27	17	31	68	91	68	13	13	21	15	19	31	30	3	14	12	9	12	14	6	82
Adamts9	6.90777	0.69527	1.51335e-06	143	186	330	329	405	287	3	1	1	0	0	0	3	2	2	0	0	1				Tmem231	2.19413	0.448536	2.73697e-05	583	566	500	474	472	535	99	126	96	44	31	56	146	86	111	128	148	108	282	548	98
Cnep1r1	-1.39282	0.257405	1.51335e-06	860	922	805	1393	1225	1175	1969	2047	2087	1567	1660	1668	2022	2113	1212	1578	1187	1163				Dpep1	-5.49587	0.929019	2.75729e-05	0	0	0	2	0	6	432	640	431	2712	2751	2287	39	99	652	2101	2669	1882	2	1	1618
Oat-rs1	-1.50026	0.254349	1.52988e-06	134	128	167	117	113	119	1724	1947	2112	1499	1377	1649	163	300	1135	94	76	73				Hspb1	5.97949	0.903474	2.7767e-05	101	77	30	20	31	34	0	0	0	0	1	0	12	10	3	8	12	3	272	99	0
Irx2	5.64872	0.704469	1.54051e-06	406	505	1506	91	65	901	2	15	20	6	10	9	13	46	53	0	0	0				Medag	5.79997	0.908496	2.79102e-05	592	463	448	104	283	422	0	0	0	0	0	0	0	1	0	0	0	0	102	48	0
Zfp383	2.08763	0.381214	1.54544e-06	239	219	236	125	138	180	116	130	115	53	64	60	59	92	108	101	113	73				Tmprss3	3.96747	0.754103	2.81441e-05	33	72	20	16	13	19	5	4	3	0	0	0	0	0	0	0	0	0	67	32	4
Aprt	-1.14934	0.213806	1.57363e-06	2962	2967	2837	3595	4198	3524	3812	4505	4302	4730	5530	5506	6260	5828	4066	7734	6135	6662				Golga7b	-5.4019	0.798319	2.81542e-05	0	0	0	0	1	1	48	73	73	31	33	53	55	51	27	6	14	9	1	0	52
Gng7	2.62722	0.464568	1.57932e-06	308	282	160	127	117	173	101	102	93	29	37	52	54	48	87	32	37	32				Ica1	1.63833	0.3354	2.81945e-05	1638	1742	1618	1823	1605	1560	595	761	836	319	438	365	944	902	822	1234	1059	919	1954	2464	666
Rarg	2.80277	0.460687	1.57977e-06	2788	2585	2418	1885	2425	2627	250	322	169	454	526	484	725	504	959	1446	1476	1356				Kcnj11	3.55907	0.758213	2.84357e-05	321	337	56	60	94	76	60	62	97	9	7	15	13	7	20	9	7	3	353	224	42
Cxcl5	9.50375	0.810013	1.58668e-06	6754	5625	3556	328	1631	6269	0	0	0	0	0	2	17	26	1	216	117	57				Bace1	3.02872	0.581669	2.85467e-05	3604	3467	5025	3167	4873	5089	433	482	564	98	159	122	448	278	268	180	195	178	2574	3197	285
Gm44250	1.64585	0.308759	1.61137e-06	1210	1195	936	706	635	738	793	903	880	436	496	614	734	587	1363	1021	1129	1325				Dnajc1	1.24973	0.258982	2.86276e-05	1863	1692	1824	1788	1785	1799	939	916	1046	560	623	921	1056	1020	1061	825	748	1129	2038	2030	986
C87977	-7.1281	0.884597	1.61243e-06	0	0	0	0	0	0	13	18	14	199	235	256	12	12	11	5	6	5				Fam71e1	2.80319	0.672836	2.88406e-05	101	84	55	7	24	14	62	32	46	14	8	13	1	2	14	32	41	17	33	63	27
Reep6	-2.04646	0.358275	1.61289e-06	1418	1531	1878	1695	1987	1813	5957	5536	4884	7836	8259	9525	1832	2173	2293	1312	947	842				Shank1	4.10926	0.808322	2.8971e-05	279	230	175	50	57	75	6	1	10	7	3	1	1	5	1	3	6	0	103	145	8
Scarb1	-1.86381	0.340561	1.64512e-06	2290	2317	3180	2909	3266	3080	5239	5346	4334	8187	4496	7972	1198	1003	598	2957	2581	2299				Brdt	2.60629	0.538085	2.92203e-05	59	54	42	35	48	27	14	17	23	10	14	17	18	11	38	8	8	8	20	64	10
Pla2g2f	-4.83038	0.648141	1.65017e-06	1	0	0	9	4	1	230	194	230	248	218	250	52	151	358	75	56	24				Fam83c	3.5808	0.672171	2.9591e-05	257	375	175	321	75	216	3	3	4	4	0	4	13	13	11	7	2	1	80	97	7
Cluh	-1.02621	0.188057	1.67599e-06	5231	5630	4465	4052	4774	4637	14341	13655	13371	8663	10037	12219	7317	9866	8163	7981	6762	7012				Cisd3	-1.70068	0.345006	2.96698e-05	279	373	276	435	359	338	1370	1461	1259	1683	1798	2130	929	1275	1411	1888	1609	1614	413	337	1665
Chpf2	1.89018	0.334958	1.7195e-06	2412	2137	1634	1680	1624	1423	694	759	656	344	386	465	496	563	393	485	472	396				Sh3bp4	1.09756	0.229719	2.97278e-05	2912	2950	3020	2344	2745	2951	1642	1848	1666	963	1188	1246	2412	2383	2208	2756	2362	2231	2547	3509	1735
4930550C14Rik	4.28466	0.636663	1.74169e-06	64	70	65	32	35	89	6	4	6	4	2	1	14	8	23	4	0	12				Fam174b	2.21097	0.46115	2.97733e-05	4337	4745	4372	5307	5627	4848	1814	1948	2015	659	833	870	522	756	1426	727	604	310	5529	4652	1422
Clca4c-ps	-6.37887	0.726112	1.762e-06	1	6	3	0	1	0	158	125	169	836	871	691	180	108	435	320	332	374				Gfra3	-5.66043	0.810727	2.97733e-05	0	0	0	0	0	0	201	226	299	74	87	87	31	75	89	10	13	11	1	0	222
Mcub	3.793	0.618364	1.77425e-06	244	216	129	107	98	111	51	38	45	5	8	3	9	9	28	11	6	17				Tomm40	-1.28576	0.27297	3.03017e-05	1987	2173	2397	2926	4019	2933	3029	3182	2863	3570	4023	4498	3830	4844	2437	4388	3696	3676	3057	2826	4083
Ptk7	2.9051	0.476658	1.77916e-06	4821	4259	4433	3503	6376	5892	928	1125	880	292	355	368	2129	2169	1674	1516	1285	1386				Zfp939	1.51397	0.321271	3.07712e-05	113	107	98	75	76	79	143	141	153	64	77	86	68	56	109	123	92	89	83	119	76
9530068E07Rik	1.22664	0.224871	1.80219e-06	7132	6608	6866	6078	8849	8905	3702	3948	3420	2582	2619	2897	4176	4005	3711	4743	4390	3990				Mylk	-3.57928	0.626002	3.10121e-05	179	171	134	49	56	46	1635	1866	1614	3089	3098	3373	775	630	1932	868	1330	2328	71	45	2448
Nat8f5	-7.91126	0.854796	1.83872e-06	0	0	0	0	0	0	71	96	107	506	353	369	0	4	3	0	0	2				Kif9	2.30609	0.456424	3.10346e-05	367	394	252	169	219	193	36	43	48	44	65	41	119	84	69	133	91	75	165	231	44
Ccne2	-2.04357	0.376321	1.9092e-06	129	177	224	301	353	278	484	499	647	483	483	577	583	929	331	846	734	712				Ppa1	-1.48963	0.311624	3.10346e-05	2361	2443	2173	3387	4125	3249	5834	6046	6033	7271	7621	8009	4231	5351	3982	7196	5745	4586	2860	2580	5792
Erich2os	3.71621	0.56515	1.91629e-06	109	89	150	92	69	82	12	14	12	5	9	6	6	10	10	7	6	27				Stxbp6	1.14346	0.243234	3.1389e-05	900	1014	768	928	716	794	751	743	813	456	500	521	669	633	932	1243	1137	932	1120	1109	1057
Tmem237	-2.05107	0.338537	1.94051e-06	263	317	206	196	206	210	4557	5481	2684	2893	2343	2869	551	437	1920	169	145	137				Rassf9	4.35034	0.809032	3.19338e-05	1117	1055	1202	677	709	777	30	49	91	4	5	8	382	306	153	501	243	78	1151	1132	8
Lrpap1	2.1608	0.388278	1.94211e-06	5177	5311	4121	2535	2755	4017	1699	1925	1992	779	906	1057	1108	1321	1241	1287	1332	1217				Trim11	1.12387	0.232217	3.20028e-05	1910	1774	1387	1099	1651	1603	936	1001	1111	682	773	919	1427	1394	967	1380	1066	1030	1742	1863	792
Rusc2	2.87927	0.447322	1.94789e-06	1118	890	1119	855	1194	1168	61	52	31	71	79	61	533	139	147	908	710	483				Gm13444	1.92892	0.395229	3.20179e-05	59	63	90	64	73	73	24	38	20	22	23	29	27	41	35	38	36	34	62	79	27
Ehd2	1.82802	0.30925	1.95567e-06	1076	1046	893	1455	2172	1696	114	152	142	126	171	117	1606	1194	500	853	593	556				Abcc8	3.21812	0.702466	3.20436e-05	797	854	144	107	212	156	369	408	451	92	112	97	108	142	187	99	62	69	1881	898	313
E230025N22Rik	3.41256	0.568081	1.96255e-06	90	104	68	38	37	46	19	19	6	4	2	6	22	16	27	78	84	84				Abo	3.79119	0.632382	3.24818e-05	139	165	65	208	124	137	0	0	0	1	2	2	28	14	7	793	663	653	207	115	1
Plagl1	3.20465	0.516191	1.96255e-06	673	825	1115	520	627	652	107	121	186	30	48	60	621	563	484	28	30	32				Tuba1c	-1.595	0.341852	3.25113e-05	1078	1267	1435	2061	2666	1925	1572	1623	1396	2089	2339	2520	3016	3297	1517	3321	3020	3253	1260	1154	1633
Trim31	-5.53368	0.65393	1.99409e-06	16	50	21	41	6	0	1532	1567	1523	2972	3242	3089	949	1117	2179	3375	2814	2428				Gpc3	-5.51183	0.805834	3.30087e-05	5	8	11	12	6	4	52	43	56	5	6	11	4	7	3	8	23	91	6	10	1127
Nlrp9b	-7.3186	0.796473	2.02057e-06	0	0	3	0	0	0	115	127	105	1022	887	874	206	111	323	1324	1186	1272				Znrf1	1.60845	0.332578	3.30087e-05	2651	2687	2001	1697	2390	2306	916	981	912	438	494	536	887	911	648	1421	1091	1034	2113	2144	736
Fads6	2.9672	0.489513	2.03818e-06	659	602	478	424	474	524	128	141	148	34	46	74	55	52	60	29	9	25				Vnn1	3.31843	0.673806	3.32303e-05	6487	5767	1826	2393	3999	5668	741	1161	1490	285	303	252	161	179	445	61	98	19	7345	4631	467
Gprin3	-1.77369	0.317151	2.04862e-06	516	490	653	802	742	595	2033	2129	3091	2113	2004	2188	1403	1477	1541	1551	1057	857				Ccne1	-1.88287	0.404849	3.33648e-05	255	266	330	488	786	674	432	411	380	448	535	586	695	931	349	918	822	841	365	308	507
Cfap45	5.34946	0.597762	2.0712e-06	208	166	208	260	315	242	2	2	1	0	6	2	5	3	3	0	0	3				Ctsf	2.59625	0.594786	3.37976e-05	1385	1000	662	291	393	586	181	246	273	63	75	36	76	54	154	250	275	218	409	390	162
Prmt2	1.61172	0.290429	2.08177e-06	945	897	645	584	827	820	244	252	197	253	293	261	327	241	294	574	439	387				Vopp1	1.64631	0.33905	3.37976e-05	4036	3725	3991	2469	2838	3387	808	1007	961	1185	1437	1253	2724	2185	2465	3376	2936	2783	4035	4194	1616
Frat2	-2.53082	0.410742	2.08555e-06	125	92	50	115	70	39	1117	1195	1282	581	753	779	441	446	751	460	416	380				Hcfc1r1	1.48599	0.306075	3.38167e-05	3565	3392	3146	2617	2842	3440	945	1020	826	1094	1124	1198	1248	700	1049	1913	1987	1366	2307	3018	988
Zfp563	1.62108	0.309274	2.09573e-06	142	153	132	96	97	123	116	146	138	74	50	94	63	81	143	93	115	99				Pde4a	2.55046	0.514792	3.39414e-05	634	579	526	460	515	721	150	125	69	68	69	62	141	36	106	99	91	69	189	355	67
Arl4c	3.10597	0.441195	2.10383e-06	4919	3910	4214	4276	8920	7233	110	180	137	76	122	84	1502	999	142	446	202	167				Mmp23	3.75632	0.77943	3.50438e-05	1860	1501	381	79	97	189	104	95	56	73	68	53	31	24	64	8	14	9	944	397	59
D16Ertd472e	4.2299	0.59255	2.13804e-06	301	323	244	267	345	284	35	41	55	10	6	11	0	4	4	7	17	2				Cntln	4.43563	0.823458	3.50517e-05	79	94	15	16	31	116	2	3	6	0	1	1	0	0	0	0	5	2	90	227	4
Pkig	-1.23622	0.226851	2.14817e-06	436	482	407	460	538	438	1192	1240	1037	1246	1298	1375	784	996	1025	1062	954	1062				Foxp2	6.01106	0.962332	3.50762e-05	83	60	82	5	25	33	1	1	0	0	1	0	0	0	0	8	9	0	85	127	0
Rybp	-1.1316	0.211573	2.15037e-06	274	291	283	288	333	303	414	468	522	549	547	564	567	661	467	659	543	592				Sdr42e1	1.81907	0.402558	3.50762e-05	719	826	593	253	254	363	890	937	1032	475	513	550	410	474	867	757	964	829	651	933	789
Wnt5a	6.51837	0.695667	2.15145e-06	878	931	540	48	148	438	3	6	3	3	1	2	3	7	1	0	0	0				Nup62cl	3.67834	0.630129	3.52771e-05	184	118	114	60	131	78	0	2	4	2	3	7	2	1	2	0	1	1	127	214	24
Slc39a14	-2.08929	0.360249	2.17429e-06	1537	1646	2024	1982	1597	1276	7873	8820	7688	11436	10906	11921	3027	2886	4653	2168	2502	2082				Flywch2	1.36613	0.290244	3.53176e-05	337	332	236	295	345	255	153	209	165	173	191	227	154	178	287	263	291	304	293	347	243
Aox1	8.27091	0.795394	2.23828e-06	604	566	401	411	293	364	0	0	0	1	0	0	8	4	0	0	0	0				Mis18a	-1.35221	0.285122	3.53176e-05	299	306	419	457	499	461	636	649	607	530	611	661	761	954	536	698	583	594	261	498	678
Ugt8a	5.9413	0.70046	2.24026e-06	194	187	357	304	255	239	5	3	6	1	1	0	2	0	4	8	98	4				Cers4	-4.26204	0.712925	3.53394e-05	117	132	41	40	6	8	4145	4169	3429	2391	2312	2964	746	1190	1311	1234	860	359	37	62	3884
Runx2	4.97285	0.603922	2.32343e-06	984	903	1373	552	1243	1580	0	1	2	15	17	8	501	251	62	33	30	35				Socs5	1.11922	0.231667	3.56673e-05	1128	1227	1026	1314	1485	1544	349	354	402	337	350	385	989	786	718	984	697	738	1149	860	335
BC016579	-1.41199	0.262379	2.39134e-06	198	215	138	208	185	146	348	393	420	319	327	339	1109	754	595	1101	890	699				Donson	-1.43724	0.300986	3.59896e-05	156	207	196	229	326	270	538	505	575	449	457	527	528	828	539	569	499	504	165	218	391
Spats2l	2.79091	0.46233	2.39134e-06	606	671	843	1211	944	724	106	131	222	92	93	67	439	319	417	247	124	149				Insc	-3.33833	0.643053	3.60314e-05	8	1	4	3	1	1	257	276	208	492	445	480	199	212	326	113	99	123	7	8	216
Scara3	7.15432	0.761017	2.4004e-06	20043	17189	11511	3493	9672	16487	47	78	63	0	5	6	102	100	59	25	11	1				Tbc1d16	1.74049	0.381099	3.62095e-05	2425	2329	2463	1516	1414	1441	872	1058	1182	950	810	997	335	302	767	195	477	421	1356	1960	1635
Neurod1	-5.30734	0.741361	2.42042e-06	0	1	1	0	0	1	242	214	264	82	70	74	22	59	131	8	7	3				Msi1	-3.50675	0.62141	3.66344e-05	32	18	5	11	39	21	1437	1394	1769	633	668	781	130	409	804	3	0	3	29	57	957
Bckdha	1.41522	0.267844	2.43756e-06	2759	2657	2441	1568	1824	2034	1820	2016	1850	1146	1042	1218	1033	1169	1540	1760	1592	1248				P3h4	1.96189	0.434427	3.66344e-05	1271	1085	889	368	702	704	218	250	214	105	110	127	110	100	174	182	147	90	437	471	305
Tmem158	3.28158	0.512713	2.45117e-06	735	745	469	445	276	327	45	56	40	37	36	45	181	76	84	45	71	110				Gm15697	-2.07145	0.430448	3.6674e-05	71	98	191	228	181	171	374	359	352	270	348	351	361	502	269	375	286	304	87	169	369
Cfap43	1.84123	0.327281	2.46766e-06	730	620	482	549	524	486	142	167	182	81	98	132	324	351	200	436	296	364				Prkn	3.64831	0.677625	3.72536e-05	77	61	52	42	34	59	3	0	3	4	8	4	12	4	9	15	23	29	40	59	4
Lgals2	-4.64992	0.603575	2.46766e-06	275	798	172	740	108	96	36938	28551	24096	19095	23139	25194	9069	13186	22264	23	37	25				Nup93	-1.1384	0.245426	3.74844e-05	1359	1487	1519	2043	2559	2171	1639	1594	1620	1716	1885	2186	2872	3756	1550	2768	2371	2454	1929	2033	2132
Clec2f	4.7429	0.658064	2.5011e-06	23	65	358	114	116	133	7	11	8	5	5	5	1	2	11	2	6	8				Erfe	-1.95605	0.409347	3.79687e-05	198	222	406	528	489	407	942	816	894	834	966	1080	1264	1646	976	937	690	599	276	365	1246
Pbxip1	1.67254	0.314073	2.50633e-06	4160	3653	3369	1493	2271	3082	2070	2165	1831	1409	1451	1688	1305	1363	2124	2091	2089	1899				Sipa1l1	-1.19063	0.248494	3.83392e-05	3750	3525	5325	4761	4344	3977	7055	7103	6217	5631	6301	7008	6433	5797	6190	9579	8117	8444	3412	2493	6531
Sephs2	-1.87698	0.346332	2.5076e-06	2935	3086	2919	4676	4730	4215	6782	7771	6048	10208	10455	11403	7269	8562	5455	3603	3016	3174				Lsm3	-1.43333	0.300733	3.91597e-05	227	238	256	318	318	244	439	498	546	447	465	477	394	689	401	341	393	361	194	311	525
Mfhas1	3.38775	0.520439	2.50842e-06	643	729	683	590	858	722	33	26	41	63	59	53	465	175	284	222	495	707				Als2cl	1.57613	0.324388	3.95968e-05	12614	12882	8149	6413	7404	7859	4520	4955	4341	3252	3990	3977	7343	6716	4134	8016	5924	5862	13017	12982	4518
Ppp1ccb	-1.00716	0.188763	2.50842e-06	617	650	704	729	783	684	1249	1403	1367	1374	1366	1554	951	1192	1053	1245	1049	1012				Gm11127	-5.63544	0.910662	3.9678e-05	0	2	0	0	0	0	95	86	104	244	177	192	0	0	2	1	1	1	0	0	67
Tmem147os	1.84677	0.339353	2.51163e-06	267	261	228	137	147	149	113	104	89	63	82	80	57	64	75	79	67	67				Cyp26b1	3.91981	0.799406	3.98893e-05	144	148	354	443	345	567	4	15	2	7	12	10	88	51	414	17	151	152	161	87	5
Gm27149	-6.06255	0.828365	2.56812e-06	0	0	0	0	0	0	400	340	417	69	60	124	11	23	135	44	25	40				Mtfr2	-1.80935	0.388276	4.01935e-05	63	88	104	143	137	123	157	152	169	134	166	179	204	325	112	188	180	226	55	108	150
Sox13	1.77691	0.330145	2.57689e-06	1304	1446	1223	1109	1652	1568	820	902	847	437	469	434	1133	1212	1652	1180	1085	1413				Slc26a6	-3.27156	0.57836	4.0332e-05	100	94	93	96	128	140	4071	4988	4209	8117	7173	8083	149	271	1604	96	134	104	123	146	4577
Lifr	7.11461	0.694206	2.58346e-06	827	828	1142	428	836	941	1	0	3	1	0	1	19	15	0	94	83	183				1700010I14Rik	3.27442	0.803055	4.04216e-05	36	35	27	1	8	5	54	72	27	7	13	5	4	26	45	99	105	163	51	65	6
Serpinb8	5.63188	0.680284	2.59297e-06	278	297	404	324	366	438	0	0	0	0	3	1	59	20	2	87	62	52				Gkn1	7.64489	1.04026	4.06435e-05	8199	18671	2484	924	2029	2887	0	1	0	0	0	4	1	3	1	1	0	0	15303	214	0
Tmem121	4.19889	0.638308	2.60202e-06	58	28	67	61	66	61	7	14	4	2	3	0	7	5	25	7	2	2				AC130529.1	7.39474	0.880263	4.06844e-05	421	538	590	698	857	924	0	0	0	0	0	2	0	0	0	2	1	0	789	146	0
Bace1	3.63688	0.55165	2.60789e-06	3604	3467	5025	3167	4873	5089	433	482	564	98	159	122	448	278	268	180	195	178				Klf15	3.12921	0.686046	4.0875e-05	161	140	120	66	42	49	50	97	59	16	8	25	2	5	27	0	0	0	37	52	8
Creg1	1.67207	0.311301	2.63946e-06	4361	3693	3018	3232	2004	2168	1672	1895	1880	1217	1308	1408	968	1176	1315	722	793	912				Pdzd3	-4.89246	0.778803	4.10702e-05	5	1	1	0	1	0	414	453	292	604	539	598	20	38	255	177	188	140	2	0	327
Prickle1	3.49197	0.536397	2.63968e-06	147	155	104	149	174	128	12	16	16	4	8	4	35	20	21	38	43	10				Faim2	3.92164	0.725274	4.12492e-05	264	248	483	925	1329	593	76	60	62	33	40	42	6	17	13	0	0	0	66	161	8
Chn1os3	4.51505	0.615044	2.65416e-06	75	67	86	49	55	78	4	2	4	1	1	0	5	7	2	6	5	4				Ugt2b38	-5.89827	0.913845	4.12927e-05	0	0	0	0	0	0	11	38	11	67	74	69	0	0	0	0	0	0	0	1	94
Fstl3	3.2556	0.525096	2.65416e-06	587	437	626	314	328	412	54	57	17	85	73	78	45	30	79	80	84	73				Stxbp5	-1.08348	0.231438	4.18276e-05	1306	1333	1363	1494	1592	1449	1842	2010	1954	2334	2801	2860	2652	2606	2086	2680	2171	2348	1502	1547	2072
Thbd	7.14394	0.756751	2.65416e-06	142	87	112	53	77	132	0	2	0	0	0	0	0	0	0	0	1	0				Defa5	-5.34343	0.827954	4.2154e-05	0	0	0	0	0	0	301	562	874	757	509	662	50	128	1219	0	1	0	1	1	400
Egfl6	4.85479	0.64642	2.65978e-06	576	618	399	553	314	470	11	36	12	6	3	2	22	26	11	14	29	78				Tbc1d9	-2.08942	0.436153	4.30108e-05	653	698	390	992	1268	868	1039	1049	1188	1262	1388	1330	742	512	525	176	168	262	617	452	1209
Dnah7b	3.44519	0.538147	2.66142e-06	210	206	128	72	79	109	5	8	10	5	7	9	217	137	73	80	63	76				Sh3glb2	1.21439	0.255	4.31458e-05	3888	3991	2763	2443	2733	2610	2059	1911	1781	1990	2265	2317	1967	1803	1727	3492	2892	2654	3972	3993	2012
Spns3	-3.86781	0.615055	2.67202e-06	13	19	26	17	22	24	52	80	43	273	274	219	146	49	34	41	24	10				Zdhhc15	3.38213	0.751192	4.31458e-05	670	657	1079	420	995	1260	267	289	365	32	49	29	11	80	165	33	64	54	383	1016	66
Celf3	-3.69004	0.535379	2.70437e-06	6	16	7	4	4	0	364	416	368	143	161	167	57	106	164	116	153	91				Ifitm3	3.35952	0.633863	4.32027e-05	1554	1240	4549	1470	2207	2269	1195	1201	895	498	491	998	1239	1744	1787	100	114	108	1157	371	81
A4gnt	3.74229	0.595948	2.71439e-06	451	471	1103	2325	1610	1215	147	153	229	110	116	149	66	179	420	14	24	6				Tfpi	-5.10585	0.829217	4.32027e-05	1	0	3	0	4	1	358	397	416	46	43	89	470	815	1176	1	3	8	1	4	559
Cdc7	-1.73433	0.322519	2.71914e-06	196	222	232	293	257	253	613	605	628	433	504	542	699	1098	442	710	676	936				Agr2	2.23122	0.493628	4.33371e-05	27747	25954	48995	68730	49127	43827	9109	8980	8572	6268	7678	7337	4947	7138	28716	3072	3409	1998	32173	26145	16118
Sh3bp4	1.17333	0.220334	2.76371e-06	2912	2950	3020	2344	2745	2951	1642	1848	1666	963	1188	1246	2412	2383	2208	2756	2362	2231				Adh1	-3.29126	0.554688	4.3465e-05	939	1347	351	449	331	684	41600	43802	34676	18681	17203	21019	179	241	2032	10425	14475	6746	274	254	8966
Entpd7	-2.20109	0.405402	2.78384e-06	538	516	582	666	843	662	878	999	977	1921	2100	2131	686	709	384	529	385	359				Enc1	1.97681	0.398847	4.3465e-05	3743	4232	3899	4384	4819	4520	1453	1664	2042	737	896	838	2200	1755	1095	2022	1707	1323	3357	5174	896
Nfix	2.01618	0.372765	2.78384e-06	2935	3781	3099	3719	3831	3996	2113	2142	2199	870	861	1176	886	1138	1500	1379	1486	1172				Gsdmd	1.74538	0.36049	4.36298e-05	15541	16429	10863	9222	7615	8091	5584	7218	5389	7194	7378	6642	7783	6681	6468	11921	10220	9666	17031	26452	7242
Syt3	3.51157	0.586413	2.78384e-06	195	168	70	37	30	58	21	18	26	26	7	19	9	9	31	8	5	9				Ddo	3.89605	1.00598	4.39227e-05	246	189	144	16	23	29	55	114	165	0	3	1	1	0	4	0	0	0	16	48	0
Glul	2.9813	0.542666	2.80546e-06	16779	19050	10439	6674	6619	8956	5158	5409	5874	1120	1300	1488	1391	1547	3019	12225	10003	6101				Vsig2	4.89285	0.91792	4.39485e-05	13781	14362	10080	8350	9505	8634	218	313	137	3	5	5	3	2	2	4	14	9	16685	11245	112
Gm14085	-4.27276	0.624244	2.8643e-06	5	4	1	0	0	1	159	177	208	91	147	69	17	16	56	0	0	1				Defa32	-5.99385	0.912485	4.39594e-05	0	0	0	0	0	0	494	844	889	2047	1528	1814	612	1412	12339	0	5	0	0	4	1928
Lyz2	-5.62422	0.658996	2.8643e-06	3	1	32	9	15	21	2348	3124	2991	3012	2573	3023	971	2006	6047	4	12	0				Htra3	3.14324	0.896955	4.41964e-05	266	201	62	4	5	9	28	36	20	6	7	2	4	7	16	5	9	3	54	107	14
Dock8	-4.43168	0.603726	2.89351e-06	22	15	16	24	86	29	769	900	880	1732	1699	1884	216	422	878	255	277	291				Dact2	-2.02931	0.40783	4.46425e-05	210	206	260	184	461	391	1297	1345	1224	1429	1222	1281	723	772	1226	555	595	489	138	190	1090
Armcx1	2.55655	0.476845	2.90728e-06	294	214	136	147	117	128	130	121	122	58	49	53	33	43	97	6	26	5				Abca3	1.14276	0.241072	4.47974e-05	6016	6388	6901	5363	5993	6075	2308	2404	2281	2665	3003	3001	3731	3229	3246	4849	4124	4456	6257	6869	3529
Dkk3	6.22744	0.822379	2.90728e-06	178	114	24	17	15	87	0	0	1	0	0	1	5	12	7	1	1	2				Pdzd2	1.85666	0.392827	4.51916e-05	45	60	35	38	28	30	241	241	251	193	163	213	24	22	75	176	231	209	381	224	157
Glt8d1	1.22645	0.230363	2.9181e-06	811	723	831	633	619	727	485	416	400	277	306	344	417	390	398	383	325	359				Wnt11	3.93662	0.823657	4.53594e-05	96	148	57	10	18	17	1	6	4	4	2	1	0	1	1	0	0	2	180	40	8
Glis2	2.20787	0.385114	2.92804e-06	1351	1281	1098	795	1182	1091	255	298	250	133	238	117	784	732	537	848	514	447				Tcta	1.30326	0.279343	4.58383e-05	899	905	771	603	560	569	581	615	505	581	576	570	393	282	523	862	781	641	830	1016	641
Itm2b	1.13809	0.216595	2.9578e-06	24493	23470	20294	16655	17376	18554	12406	14283	13780	13278	14362	14082	9382	8244	13255	17152	18058	14672				Fam43a	2.29164	0.451647	4.5868e-05	945	1038	578	697	1245	1061	62	84	65	50	76	54	402	176	126	734	721	612	1182	638	135
Nova2	4.00349	0.597521	2.97134e-06	127	195	76	107	214	189	6	17	19	3	5	4	16	16	21	83	37	22				Gm21885	-5.98556	0.930496	4.59873e-05	2	0	2	2	1	1	355	359	222	2072	2121	2002	15	50	224	25	14	35	1	0	670
Slc37a3	1.13075	0.211801	2.97134e-06	4397	4044	3984	4163	5487	4538	2079	2326	2629	1589	1695	1771	2466	2441	2148	2033	1871	1858				Parp3	1.77478	0.36682	4.6199e-05	1346	1354	646	939	1361	1150	319	325	370	365	484	396	740	564	740	1249	1060	881	932	637	242
Dcaf15	-1.25814	0.236403	3.02214e-06	1058	1081	910	884	944	900	1734	1763	1469	1947	2216	2344	2362	2316	1866	2769	2457	2325				Pear1	1.95557	0.395246	4.62401e-05	3453	3417	2314	1432	1943	1984	511	582	357	459	676	472	1423	1310	826	2133	1576	1768	3959	3757	595
Nadk2	-1.65203	0.295137	3.02214e-06	1291	1337	1313	1330	1118	1176	8623	9165	8578	4184	4306	5290	2406	2705	3267	1390	1207	1092				Cfhr2	-7.23301	0.977248	4.62587e-05	0	2	0	0	0	0	100	106	122	23	30	72	0	0	0	0	0	0	0	0	62
Dsp	-1.22796	0.232386	3.08378e-06	9448	10581	11528	12385	11779	9250	15215	16735	17204	19349	20467	20427	33188	27373	22426	40807	30237	35063				Plgrkt	-1.67439	0.337487	4.63384e-05	949	908	597	809	715	716	4403	4504	3491	4749	4902	4755	2196	2065	5000	7686	6034	5202	1105	872	5725
Wdr35	2.15335	0.382601	3.08777e-06	1384	1476	1147	936	1082	1214	376	377	447	165	175	229	513	464	359	431	389	384				Bambi-ps1	-3.68663	0.751447	4.66434e-05	0	1	3	1	1	2	10	11	7	19	40	13	12	11	4	20	21	5	3	3	23
Btnl4	-5.12702	0.616304	3.09552e-06	26	38	13	6	0	2	1594	1798	1420	1968	1834	2036	338	404	1364	951	978	1166				Clic3	3.29569	0.56241	4.69834e-05	745	795	451	649	1159	764	9	24	26	26	43	22	265	162	43	35	28	5	870	480	16
Gsto2	2.77536	0.471346	3.10022e-06	96	77	82	58	69	59	15	17	16	18	15	12	13	4	18	62	29	47				Gm6175	2.69656	0.547688	4.72309e-05	51	70	49	27	36	31	3	13	5	9	7	9	17	20	19	4	3	3	59	56	15
Ccnd1	1.43714	0.258606	3.14394e-06	28754	26591	24668	29850	45553	45106	5886	6764	7398	5554	6668	6602	26233	24344	12675	23187	18579	19406				Slc2a7	-5.25607	0.954823	4.74944e-05	1	1	2	0	1	0	50	43	30	385	258	333	0	0	0	0	0	1	0	0	63
Trim45	1.41425	0.268185	3.25148e-06	257	214	229	192	209	213	137	162	148	84	147	98	130	115	193	206	166	159				Hist1h4i	-1.63496	0.361038	4.79908e-05	21	24	29	49	59	39	60	57	54	68	58	67	93	89	30	117	92	99	34	46	58
Myrip	-4.20036	0.648648	3.25723e-06	3	0	0	2	0	1	120	105	175	45	60	61	46	76	188	8	15	9				Klhdc4	-1.09149	0.238095	4.86301e-05	688	788	729	952	1238	905	862	813	866	929	959	1123	1462	1868	831	1387	1044	1049	886	1002	1040
Ajuba	1.43364	0.256462	3.31532e-06	3823	4095	3798	3599	5908	4910	676	976	751	591	731	640	4256	4094	1545	2726	1857	1862				Dixdc1	2.91176	0.639712	4.91836e-05	717	674	549	346	266	318	176	246	285	36	48	48	55	60	85	36	47	37	298	613	63
Slc25a25	-1.60778	0.303212	3.32896e-06	486	511	417	602	757	634	866	923	946	1213	1280	1441	1722	2098	1289	1044	837	835				Thbs3	2.8501	0.655884	4.93192e-05	266	208	249	89	71	151	56	87	98	14	12	18	21	21	29	53	34	35	154	274	57
Wdr19	1.90476	0.350588	3.3602e-06	1114	879	859	557	650	706	358	419	328	189	264	196	379	313	386	620	532	407				Wnt9b	-5.27634	0.912768	4.93192e-05	0	0	0	0	0	1	29	30	18	22	15	24	7	4	9	0	1	1	0	0	28
Pcyt2	-1.62887	0.304137	3.37864e-06	3389	4066	4054	3752	3689	3335	7633	7756	5718	9597	10181	11139	4719	5898	3761	6086	5446	5103				3110070M22Rik	-2.94042	0.64084	5.07012e-05	9	20	20	12	14	26	12	18	23	24	37	27	26	18	5	16	14	14	9	0	15
Sema3b	1.14407	0.219365	3.39822e-06	4326	4249	3364	2593	2792	2897	2465	2803	2074	2117	2227	2296	1535	1623	2136	3861	3547	2993				Klf7	1.16487	0.253237	5.07241e-05	1206	1119	1087	859	810	863	1230	1278	1280	1168	1131	1272	619	567	1037	916	844	893	1116	2112	1598
Tctn1	1.62188	0.296186	3.41168e-06	1276	1292	1070	670	928	969	287	358	347	243	298	277	620	469	392	654	524	447				Tbc1d24	-2.30758	0.458467	5.07241e-05	482	424	460	349	381	398	1606	1395	1087	2404	2366	2382	986	850	1409	1563	1096	1083	219	191	2182
Fam167a	3.87648	0.604851	3.44056e-06	92	80	118	77	278	191	12	23	24	7	4	10	14	14	37	12	18	7				Cdca2	-2.02032	0.427065	5.08719e-05	378	496	917	1126	975	914	1592	1537	1399	1234	1281	1549	1724	2387	1188	1579	1368	1366	428	867	2014
Nr4a1	2.04696	0.363817	3.47117e-06	652	608	640	775	1191	868	208	209	226	117	136	155	367	376	343	373	291	191				Zfp52	1.48828	0.297514	5.12477e-05	963	898	1104	1209	1167	1167	38	55	41	63	106	70	561	354	144	805	527	421	948	833	90
Hnrnpd	-1.02846	0.196691	3.49248e-06	3412	3738	3886	3984	3859	3358	7182	6684	5537	5092	5628	6638	7323	9665	5659	6987	6123	5541				Aaed1	1.18192	0.254282	5.12966e-05	2490	2404	1491	1715	1883	1545	1453	1589	1734	1025	1049	1167	1076	1138	1342	1939	1572	1493	2112	2291	1110
Tshz1	-1.24708	0.235391	3.51681e-06	677	712	602	568	682	649	1366	1547	1886	1002	1159	1216	1419	1337	935	2296	2131	1811				Hivep3	3.24671	0.690588	5.16685e-05	359	378	153	53	63	82	20	15	13	8	4	5	21	7	27	78	133	134	307	346	31
Pnp2	-3.33637	0.51292	3.56948e-06	63	73	15	36	40	38	420	406	330	644	716	726	32	32	39	880	790	826				Mpst	1.22994	0.266896	5.16754e-05	1560	1629	1475	1343	1319	1287	1178	1343	956	1166	1243	1311	1152	1037	1770	2303	2244	2017	2357	2299	2053
Chga	-4.99106	0.584901	3.63807e-06	19	17	6	3	1	0	3244	3794	5436	1303	978	1399	111	282	1705	138	185	93				Cers6	-1.66857	0.349066	5.16831e-05	1951	1990	3023	4076	2814	2537	8310	8910	9984	8689	8728	9412	5534	6507	6734	8639	8098	8183	1744	2655	5771
Gpsm2	-1.5505	0.289314	3.63807e-06	1106	1367	1533	2038	1697	1628	3545	3745	3383	3907	4194	4669	2925	3336	2842	3822	3353	3555				Itm2c	1.4888	0.322739	5.26999e-05	6728	6060	5936	4232	5228	6494	2413	2601	2726	1156	1381	1461	2154	1824	2234	2062	1539	1600	3604	4771	2669
Plekhg5	1.59518	0.300054	3.63807e-06	962	918	749	654	681	677	507	475	436	227	249	340	514	590	604	277	207	177				Ngfr	5.41645	0.969665	5.32792e-05	4	0	1	0	0	1	1	6	8	0	0	0	2	1	11	1	1	0	350	47	3
Serpinb1a	-2.48143	0.418588	3.63807e-06	1946	2226	1301	1342	1004	1052	8902	9856	8623	12767	15733	11677	7669	5633	9722	7090	6080	5504				Fam107b	1.38916	0.294765	5.34777e-05	9970	10055	7772	11183	13894	10719	3447	3864	4207	2228	2548	2888	5320	4522	4094	5845	5099	5133	9535	8093	3878
A530084C06Rik	-1.95985	0.363107	3.70688e-06	20	24	41	33	40	29	101	111	97	73	79	62	118	109	65	86	61	69				Zfp551	2.05098	0.463853	5.34777e-05	114	104	83	51	72	80	91	93	115	33	29	29	35	37	75	46	69	54	89	107	74
Slc25a28	-1.27657	0.241115	3.73891e-06	659	697	609	562	519	652	1260	1233	1118	1333	1598	1564	730	819	659	934	778	758				Clmn	1.65449	0.35938	5.3775e-05	7110	6965	9826	5164	5202	5952	2936	2881	2672	2913	3126	3205	2963	2019	4263	9826	8413	6870	6410	7875	4974
Rasgrf2	-3.7263	0.57779	3.76269e-06	37	68	48	263	59	61	1349	1435	1348	1416	1440	1411	760	727	725	15	29	20				Nes	-3.56967	0.635107	5.3775e-05	64	62	57	62	194	217	37	45	64	49	47	54	535	1062	1183	41	31	88	98	88	2162
Gatm	2.47014	0.425346	3.78291e-06	252	289	379	432	374	542	78	88	57	37	65	57	71	53	63	242	339	258				Ly6g	-3.11124	0.706527	5.39222e-05	2	4	1	28	25	8	18	24	11	16	30	16	1994	662	237	17078	14387	15671	10	10	67
Fanca	-1.64374	0.318993	3.80271e-06	404	517	655	829	969	830	933	872	836	910	1066	1205	1659	2193	817	1646	1283	1302				Agpat5	-1.11925	0.239752	5.40391e-05	1299	1179	1467	2019	1954	1586	2596	2442	2462	2096	2122	2303	2147	2468	1926	3191	2860	2776	1506	1650	3061
Ubxn10	2.60452	0.549109	3.80271e-06	57	68	32	23	44	28	81	86	25	18	14	17	16	41	213	26	31	44				Tomm22	-1.11729	0.242821	5.40391e-05	1408	1517	1483	1806	1959	1729	1781	1997	1977	2530	2673	2950	2177	2575	1627	2723	2429	2246	1563	1566	2030
Mycbpap	2.02287	0.365443	3.82322e-06	649	646	463	442	447	468	161	184	136	139	146	127	227	119	196	173	224	107				Maml2	2.7042	0.53561	5.40522e-05	939	903	732	548	644	768	185	212	207	59	95	50	328	238	161	192	120	144	778	955	74
Slc26a6	-3.76968	0.52378	3.83326e-06	100	94	93	96	128	140	4071	4988	4209	8117	7173	8083	149	271	1604	96	134	104				Mycl	-1.29909	0.272126	5.41588e-05	698	619	682	446	667	629	2058	2304	2122	1222	1262	1528	1516	1763	1684	2517	2175	1787	667	577	1773
Boc	2.8205	0.557796	3.84622e-06	175	134	68	29	29	26	34	43	36	45	27	31	64	115	423	472	914	1240				Tdrd5	2.96278	0.48969	5.49265e-05	483	360	205	367	450	459	10	12	14	7	14	16	27	17	4	2	1	1	409	275	18
Cyp3a11	-6.7339	0.742111	3.86752e-06	0	1	0	3	0	1	1072	1339	1036	1997	1430	1341	3	11	267	0	0	0				Pcna	-1.35024	0.289043	5.56138e-05	645	835	894	1096	1236	1072	2171	2078	1942	1801	1906	1943	1984	2674	1689	2163	2339	2380	758	935	2193
Vwa5b2	-5.5071	0.709567	3.88467e-06	0	2	0	1	4	1	452	360	444	81	100	141	19	101	90	11	14	10				Bmyc	1.16676	0.254423	5.56571e-05	675	658	615	525	619	608	506	537	428	252	257	314	260	268	323	191	224	216	613	750	505
Fcna	2.21618	0.439013	3.92332e-06	82	91	39	60	42	43	54	86	90	42	42	37	48	33	240	29	56	33				Slc6a19	-6.10888	0.953577	5.60842e-05	5	8	5	0	0	0	352	459	414	1854	1469	1592	5	22	73	29	7	5	3	0	1514
Gp1bb	-4.9688	0.832444	3.9776e-06	0	1	0	0	0	0	19	17	14	19	31	45	19	36	37	4	4	6				Snph	-4.12627	0.697422	5.60842e-05	0	0	0	0	0	2	271	231	213	144	153	180	51	57	178	24	29	9	0	2	135
A630076J17Rik	8.32802	0.765981	3.98214e-06	430	262	203	60	226	324	0	0	0	0	0	1	0	0	0	0	0	0				Ttll10	2.29174	0.530567	5.60842e-05	1274	1197	801	318	336	511	728	655	408	277	335	290	200	105	448	513	488	503	438	1119	635
Mpzl1	1.46295	0.273379	3.98893e-06	4902	4763	7003	6092	6845	6983	2725	2950	2500	1702	1901	2112	2851	3111	2816	3159	3062	2660				Gm2a	1.71114	0.365257	5.61358e-05	6488	5621	4733	2856	3153	4065	763	917	668	597	661	659	1350	1050	878	1166	1045	815	2605	2456	1040
Cpn1	2.57682	0.452432	3.99461e-06	2915	2800	3560	1817	1944	2272	885	982	823	351	309	504	180	341	233	38	27	27				Hepacam2	-4.10994	0.665292	5.64605e-05	58	40	93	16	5	15	1810	2025	2453	769	857	917	499	912	2448	300	328	197	6	38	2400
Zdhhc14	-1.77252	0.323434	3.99461e-06	62	48	71	35	50	55	184	192	218	198	213	202	348	354	379	784	460	386				Igsf23	-3.53977	0.707311	5.65843e-05	1733	1860	1049	3582	2911	2419	3597	3926	3584	8398	8760	8573	5141	3640	4033	317	704	945	497	36	4963
Ttc26	1.9942	0.358329	4.03961e-06	612	631	484	379	377	485	116	125	171	85	88	132	252	244	180	209	149	98				Hsh2d	1.60764	0.335208	5.72522e-05	241	305	245	362	316	281	385	349	297	228	244	237	391	277	299	268	288	294	416	677	208
Emp2	1.0522	0.198173	4.07134e-06	8591	8044	8242	9746	8136	7667	2751	2979	2475	2772	2865	3247	8611	6249	5190	11524	8257	7698				Tm6sf2	-3.71736	0.676666	5.72522e-05	140	222	78	204	152	114	2377	2581	1851	6905	6974	7007	252	333	1195	607	371	203	131	95	3366
Gm44101	-5.34664	0.845163	4.07715e-06	0	0	0	0	0	0	18	13	7	28	25	23	10	11	11	4	1	5				Atp2c1	-1.02148	0.221972	5.74125e-05	4384	4230	4511	4389	5112	4962	3126	3571	3691	4288	4731	4573	10633	9256	6607	7952	7274	8157	3596	3817	4118
Lrrc8c	3.82376	0.529972	4.07715e-06	477	321	722	601	1621	1334	13	11	9	13	26	15	189	119	45	141	100	56				Tnfsf15	-4.89986	0.763953	5.77423e-05	1	0	0	0	1	0	29	34	55	66	73	59	159	147	93	397	287	363	1	0	23
Lrrc74b	3.74368	0.617162	4.09284e-06	92	88	76	28	16	21	27	29	17	2	5	3	0	2	7	0	0	0				Cyp2d10	2.98144	0.613087	5.84505e-05	4	7	2	6	2	3	53	61	24	31	37	29	10	3	28	199	300	231	30	25	6
Neurl1b	-2.80971	0.481196	4.14473e-06	182	204	337	276	225	270	873	918	840	2085	1894	2038	712	1028	750	1296	922	975				Tspan7	-1.18767	0.25117	5.8505e-05	1930	1788	2584	2205	2752	2718	4134	3980	3788	3006	3314	3596	2585	3272	3344	2857	2665	2348	1184	1775	4503
Rab29	1.09638	0.210496	4.19275e-06	389	371	272	362	349	365	174	233	221	167	195	217	221	254	270	316	325	336				Sephs2	-1.49147	0.326518	5.86688e-05	2935	3086	2919	4676	4730	4215	6782	7771	6048	10208	10455	11403	7269	8562	5455	3603	3016	3174	3024	3969	5910
Rundc3b	-3.37524	0.528645	4.21773e-06	71	58	249	50	137	128	1243	1218	1270	1731	1765	1820	1412	1759	1993	1980	1731	1652				Trip13	-1.85967	0.408866	5.88159e-05	225	283	461	677	718	538	760	735	687	710	734	856	1170	1450	593	940	719	700	322	590	910
Tap2	1.50027	0.285775	4.24164e-06	1003	1006	762	654	799	853	357	431	494	504	417	474	529	431	752	686	771	817				Twsg1	1.00905	0.217776	5.99507e-05	3488	3531	3769	3240	4269	4366	1995	2123	1991	1415	1355	1510	1304	1493	1417	1817	1736	1677	2779	3273	1480
Tmprss7	-4.30174	0.705157	4.27797e-06	1	1	0	1	1	0	32	37	28	19	12	12	69	37	42	98	64	62				Ret	-2.5997	0.498054	6.01906e-05	29	26	54	36	56	51	116	143	158	93	122	110	42	120	140	35	83	61	26	40	338
Slc16a6	-2.34535	0.438437	4.32104e-06	402	386	702	1125	1120	911	1400	1460	1612	2263	2357	2653	2033	1789	1063	633	472	464				Scml2	3.28558	0.757846	6.01906e-05	35	36	12	28	13	9	20	20	34	7	3	5	3	10	15	7	7	3	25	28	6
Arhgef17	2.06619	0.366651	4.35462e-06	2975	2752	4242	2493	4079	3870	720	1015	499	511	614	631	2003	1414	1414	1857	1161	946				Efemp1	2.88365	0.508856	6.03652e-05	6633	6502	6247	4403	3243	4478	113	158	179	289	405	278	2558	1185	278	420	342	199	4709	6011	160
Ikzf2	4.46798	0.637028	4.38734e-06	426	337	324	117	131	250	14	7	19	0	6	2	100	51	39	146	141	176				Muc2	-4.0471	0.641851	6.05691e-05	144	125	206	160	58	18	8839	6146	6179	1811	1968	2076	1587	4050	18726	2289	2447	2863	34	107	10393
Apoc3	-9.05793	0.902325	4.40416e-06	0	0	0	0	0	0	462	496	422	3314	2625	2348	6	14	68	0	0	0				Cat	-1.63029	0.339416	6.09405e-05	3533	3263	2560	5227	3973	3277	11693	12511	11700	10201	10878	11661	3203	3234	5013	4399	4672	4189	3611	2299	11399
Hipk2	-1.5908	0.296837	4.42594e-06	1136	1283	1198	1465	2158	1522	3811	4302	5110	4014	4192	4548	2157	2668	2381	1819	1750	2097				Gm17783	-5.60447	0.925621	6.10048e-05	0	0	0	0	0	0	700	716	677	102	81	105	84	100	321	0	2	1	0	0	185
Tmem200a	5.20931	0.663021	4.4619e-06	431	421	256	345	298	365	7	4	15	3	0	3	33	11	11	2	7	26				Tinag	-2.28527	0.45398	6.10048e-05	221	198	277	99	126	201	663	694	713	618	622	636	355	551	533	1304	1018	815	38	152	689
Tctn2	1.78191	0.326183	4.47956e-06	948	940	788	552	852	732	259	290	279	162	154	190	370	303	237	413	362	263				Acer1	-5.15801	0.806776	6.14699e-05	0	0	0	0	0	0	99	81	65	114	102	129	4	8	51	115	96	79	0	2	163
Tmeff1	3.6991	0.568033	4.49962e-06	1511	1297	1290	1799	2537	2179	153	223	112	26	58	37	1104	929	707	1469	1360	1033				Arhgap11a	-1.05641	0.231874	6.18288e-05	1516	1700	2197	2458	2211	2067	2837	2899	2908	2313	2438	2880	3646	4461	2100	3083	2610	2582	2038	2540	2919
Ypel4	5.31554	0.676366	4.5051e-06	195	173	101	42	44	51	1	2	2	2	4	1	3	6	3	0	1	1				Gm42528	2.35191	0.480133	6.31875e-05	443	472	226	174	252	299	81	67	100	90	87	110	139	157	109	186	113	72	460	478	126
Igfbp5	5.05516	0.688733	4.51498e-06	443	355	310	30	43	39	8	16	7	3	3	5	6	6	9	0	1	0				Gm5113	1.15437	0.254695	6.3985e-05	303	293	237	152	165	212	241	244	276	157	188	235	149	155	238	232	221	191	205	234	183
Rgs16	3.39643	0.652492	4.57911e-06	87	47	81	24	70	75	27	30	42	1	4	5	6	23	81	3	7	13				Brd3os	3.12896	0.662891	6.42822e-05	115	99	58	28	48	62	22	12	14	5	10	11	15	7	22	3	3	3	95	87	32
Pcdhb17	3.29252	0.551924	4.62253e-06	85	75	56	21	84	60	9	8	12	3	11	9	15	27	33	17	16	6				Gem	-3.61924	0.776557	6.45481e-05	9	9	20	34	14	10	18	27	23	106	101	78	76	85	36	12	12	18	1	7	53
5730409E04Rik	5.25471	0.717516	4.67213e-06	116	109	31	29	64	72	3	1	1	1	0	0	13	3	6	9	18	19				Angel1	1.31832	0.286398	6.46331e-05	553	473	461	366	483	494	306	391	404	207	229	231	476	450	449	533	525	513	471	746	311
Lpar5	-2.11553	0.375201	4.74831e-06	97	165	102	189	105	104	680	697	546	668	744	831	330	369	483	534	361	313				Prkca	-1.32239	0.281181	6.46331e-05	1815	2144	1704	1745	1332	1309	5835	5907	5818	6098	6564	6880	5057	5533	6347	4542	4124	4880	2390	1761	6681
Gcnt3	2.00265	0.372335	5.07672e-06	16221	19166	11368	16066	16357	15475	5331	5653	4988	6816	6989	6179	5923	5733	11020	3063	3589	5378				H2-Q2	-3.80074	0.668984	6.4721e-05	175	178	242	118	48	77	2298	3057	3092	9035	7180	7714	607	545	2684	3622	3904	3449	65	102	3924
Tnfsf10	-3.39183	0.484795	5.15692e-06	27	24	17	18	8	17	1683	1725	2887	643	521	716	155	234	1034	41	70	45				Stox2	1.7485	0.367689	6.55027e-05	908	795	783	854	1174	1109	106	106	149	59	95	56	210	237	174	33	20	33	500	661	138
Tnfsf9	1.83738	0.337499	5.24366e-06	563	501	782	566	716	669	205	174	118	168	173	221	186	178	194	242	272	304				Arap1	1.02692	0.225564	6.57767e-05	3799	3428	3521	1988	2651	3105	2525	2683	2337	1844	1945	2211	2165	1877	2867	3609	2974	2591	2802	3264	2228
Rhoj	7.75021	0.766145	5.30197e-06	206	154	175	265	325	337	0	0	0	0	0	0	3	0	1	0	1	0				Lpar5	-2.00493	0.417145	6.57767e-05	97	165	102	189	105	104	680	697	546	668	744	831	330	369	483	534	361	313	164	81	607
Ces2a	-6.33696	0.64064	5.3782e-06	27	75	3	5	2	3	27070	22295	16260	10496	11906	9838	309	519	6051	543	900	891				Ccnd1	1.37718	0.287406	6.60689e-05	28754	26591	24668	29850	45553	45106	5886	6764	7398	5554	6668	6602	26233	24344	12675	23187	18579	19406	35636	25484	7058
Hilpda	2.31088	0.399586	5.39843e-06	1252	1046	1468	2114	2351	1861	168	223	170	229	266	255	378	197	258	1031	868	901				Gm6166	3.05986	0.564741	6.65542e-05	191	224	205	133	115	103	44	37	28	51	53	51	12	32	16	10	14	24	1976	738	78
1810043G02Rik	1.74925	0.325364	5.42838e-06	625	617	457	472	413	479	201	240	193	116	119	139	184	145	138	264	182	214				Rph3al	-1.40571	0.287109	6.6997e-05	249	263	238	288	277	217	2176	2559	1623	1749	1667	2072	415	487	1615	512	517	535	316	409	3205
Ccdc103	3.10379	0.512526	5.43412e-06	86	78	59	41	53	85	11	8	14	9	4	10	6	13	8	15	15	14				Treh	-5.92855	0.920801	6.7434e-05	1	0	13	2	2	0	1413	1970	1660	3476	2898	3598	2	23	71	5	7	0	2	5	2457
Tnik	-2.34078	0.405643	5.50361e-06	429	529	378	374	248	253	1884	1958	2002	2896	3127	3169	1771	1991	2616	2296	1808	1634				Gm19557	3.78015	0.665956	6.75582e-05	116	157	111	92	85	72	0	0	2	0	3	4	16	15	6	11	13	13	138	78	0
Spata6	3.35652	0.475335	5.50989e-06	1621	1575	1246	1471	1638	1379	21	56	22	27	82	29	100	45	14	746	650	625				Dsg1c	-5.00052	0.873673	6.78522e-05	0	1	3	1	8	1	7	7	4	11	12	9	17	21	4	0	0	0	1	0	11
Zmat1	3.02962	0.550845	5.60001e-06	148	117	65	48	49	69	15	38	64	24	11	20	6	10	27	18	8	15				Arl4a	-2.12973	0.441372	6.79454e-05	222	196	153	245	254	237	721	783	662	1257	1382	1371	1193	1196	1575	1940	1999	1919	197	334	1578
Lgals4	-2.10723	0.378183	5.65682e-06	21050	30117	14242	32272	20390	18448	83138	103215	85659	107783	127982	127588	97739	103096	116129	151481	124203	118708				Loxl1	3.99108	0.920059	6.86341e-05	147	123	63	31	37	69	1	1	0	0	0	0	0	0	0	0	0	0	7	10	0
Tubb2b	-2.08028	0.421902	5.69983e-06	296	271	297	317	720	358	228	242	227	518	518	570	837	568	151	295	208	272				Gm14399	1.98031	0.451812	6.94054e-05	86	81	47	50	49	55	84	86	115	33	38	48	26	31	70	29	46	53	46	43	29
Dnmt3a	1.06066	0.208876	5.71489e-06	2523	2164	2473	1943	2291	2322	2289	2428	2317	1319	1514	1662	1269	1366	2028	1223	996	1121				2500002B13Rik	1.54248	0.329001	6.96786e-05	258	301	302	274	192	249	121	139	125	128	123	155	137	110	131	128	110	85	254	502	138
Duox1	3.8568	0.613125	5.73696e-06	54	58	40	22	30	12	4	5	5	7	0	4	3	4	9	9	5	9				Ptprn	2.71612	0.689082	7.01146e-05	708	605	657	784	2017	1713	91	143	169	102	71	88	5	12	51	14	13	17	1270	317	399
Slc25a23	2.23021	0.430827	5.79972e-06	3268	3079	3115	1724	1774	2364	2024	1836	1702	565	693	852	652	930	1267	361	424	504				Defa21	-6.08348	0.890785	7.01312e-05	0	0	0	0	0	0	225	333	471	827	608	685	93	247	2235	0	0	1	0	1	587
Sorbs3	4.02516	0.647761	5.81876e-06	1632	1799	1171	880	995	878	192	186	160	20	13	16	114	107	141	93	178	238				Alox12	4.51593	0.758621	7.03127e-05	386	350	281	238	227	237	2	1	1	0	0	0	13	9	2	114	51	18	75	215	0
Cacnb1	4.10931	0.640014	5.8497e-06	363	305	235	72	121	165	27	34	30	3	5	3	23	9	25	19	29	24				Gm14276	-1.93168	0.409128	7.16861e-05	36	30	26	42	45	34	84	74	74	46	49	56	80	102	64	61	53	58	11	34	89
Gas6	2.64267	0.569784	5.86902e-06	14501	17743	7945	2883	3420	5504	10341	11231	9436	2065	1719	2333	1477	2291	9191	9521	8603	6594				Itm2b	1.09908	0.241407	7.2191e-05	24493	23470	20294	16655	17376	18554	12406	14283	13780	13278	14362	14082	9382	8244	13255	17152	18058	14672	24600	19333	16142
Trim47	4.57312	0.592071	6.01667e-06	238	285	432	997	1032	488	16	16	8	9	8	6	32	10	13	7	6	6				Inhbb	3.22832	0.796339	7.22515e-05	495	548	190	25	64	133	3	5	2	1	1	4	0	0	3	0	0	0	36	52	8
Ggh	1.41762	0.274404	6.02818e-06	2278	2304	2162	1818	1699	1870	1201	1352	1096	1205	853	936	269	182	323	3135	2825	2218				Kank1	-2.03609	0.422768	7.32581e-05	49	71	81	96	119	71	1521	1671	1617	1241	1171	1388	839	1062	1522	1477	1349	1306	356	134	1424
Gm32540	-5.26082	0.764003	6.06852e-06	0	0	0	1	1	0	299	268	216	70	66	107	12	18	93	26	22	38				Ccdc157	1.78198	0.386223	7.33367e-05	775	815	501	336	401	444	235	224	260	145	136	159	215	250	188	237	198	194	420	676	199
Hopxos	-4.44838	0.805953	6.07264e-06	0	1	0	0	0	0	22	23	21	10	15	18	13	22	23	14	9	5				Gpr17	-4.74135	0.894385	7.3348e-05	0	0	0	0	0	0	11	20	21	35	22	42	22	16	27	15	17	16	0	0	38
Brd3os	3.29534	0.553652	6.43067e-06	115	99	58	28	48	62	22	12	14	5	10	11	15	7	22	3	3	3				Stra6	5.51467	0.924059	7.44087e-05	1493	1159	5606	3114	5516	10520	0	4	2	0	0	1	502	221	60	326	156	26	1139	300	1
Chst12	2.96473	0.489254	6.48479e-06	208	166	87	145	159	142	30	24	11	9	18	9	27	17	17	76	69	60				Chn1	2.65022	0.534672	7.48615e-05	255	212	325	165	289	359	12	18	21	12	11	15	10	12	11	9	13	14	46	132	11
Pola2	-1.0597	0.206835	6.48577e-06	1130	1318	1449	1567	1490	1315	2569	2671	2546	2145	2363	2743	2542	3471	2296	2634	2382	2584				Zfp185	2.05264	0.404667	7.48615e-05	452	399	473	419	422	433	39	45	31	45	94	50	872	849	214	556	522	390	385	351	18
Gcat	-2.59017	0.477164	6.63715e-06	142	135	158	268	211	151	383	436	299	850	829	873	269	418	186	258	232	214				Inpp4b	-2.5918	0.56369	7.61055e-05	12	25	58	95	86	86	160	170	180	134	177	192	208	256	127	225	143	110	31	49	150
Tmem131	-1.00369	0.19677	6.64191e-06	4500	4929	5188	5547	5169	4664	7922	7706	6422	7708	8886	8718	13278	12222	10117	16362	12777	13973				Sccpdh	-1.09544	0.236808	7.61084e-05	1020	922	1005	893	1148	1095	884	999	948	1131	1137	1190	685	610	695	2372	2311	2072	562	786	1284
Itgb5	1.80396	0.341673	6.66885e-06	2924	2581	2663	1761	2243	2811	782	1005	792	1126	1114	1233	538	516	908	1015	731	757				Gm15292	-5.36086	0.940017	7.65987e-05	0	0	0	0	0	0	37	105	108	189	156	187	19	40	122	0	0	0	0	0	75
Gm830	3.70454	0.655111	6.73081e-06	1272	1048	965	531	635	1181	247	296	321	19	22	21	8	22	41	5	4	9				Slc39a14	-1.73308	0.364537	7.66645e-05	1537	1646	2024	1982	1597	1276	7873	8820	7688	11436	10906	11921	3027	2886	4653	2168	2502	2082	1257	1989	8135
Fam184a	5.39294	0.659431	6.78157e-06	71	51	78	20	53	41	0	3	1	0	0	4	0	0	2	0	1	0				Mrpl18	-1.16591	0.256846	7.68384e-05	693	827	827	993	1104	940	881	1093	1097	1237	1283	1333	1067	1473	920	1351	1285	1164	832	783	1253
Spag4	1.90373	0.353224	6.79627e-06	215	196	139	137	120	175	53	67	50	35	35	50	95	77	73	30	37	26				Sema6d	-3.98729	0.683544	7.75414e-05	23	12	8	2	8	3	1270	1060	935	1705	1819	1924	147	434	1520	1217	1325	1818	71	17	3036
Fbxo44	1.82189	0.347045	6.91915e-06	655	608	681	277	439	529	251	286	201	193	228	253	132	170	213	114	102	69				Fgf15	-5.15214	0.766666	7.75769e-05	1	1	2	2	1	1	87	104	160	120	112	106	1119	1805	5140	21	38	52	1	0	415
Sgcb	1.3748	0.250519	6.97034e-06	899	691	1078	1125	1370	1341	122	134	138	139	183	161	567	456	180	453	345	324				Ggta1	3.18312	0.534933	7.7605e-05	1752	1507	2302	2696	3694	3001	18	17	10	55	122	49	1361	837	125	141	135	109	3217	3093	48
Pla2g15	1.63414	0.308683	7.02818e-06	518	421	374	304	375	435	148	180	177	79	121	127	206	174	159	180	172	135				Slit1	-4.93562	0.89834	7.77527e-05	1	1	1	3	1	4	52	52	33	19	34	46	16	33	42	8	2	0	0	0	36
2010106E10Rik	-9.1304	0.878042	7.12961e-06	0	0	0	0	0	0	1115	1570	1643	5826	4111	4241	7	72	633	7	10	0				Lsm4	-1.14173	0.250868	7.79188e-05	1068	1188	1400	1675	1723	1505	1855	2006	1664	2159	2181	2422	2101	2405	1835	2187	1782	1676	1451	1729	2756
Pwwp2b	1.01518	0.198958	7.14158e-06	2269	2150	1618	1685	1668	1640	1119	1279	1148	806	904	921	1605	1582	1459	1649	1288	1261				Eif1ad	-1.04743	0.232886	7.82218e-05	1052	1082	1111	1224	1483	1424	1846	1827	1882	2172	2371	2446	1969	2605	1475	2315	2190	2100	1605	1665	2131
Gm38399	4.15123	0.656736	7.16991e-06	27	30	27	29	25	22	2	2	2	0	0	1	5	7	5	6	6	4				Sbno2	1.22831	0.262433	7.85248e-05	6961	6721	6524	4983	6160	6592	1895	1955	1740	2417	2740	2567	5019	3941	3043	4111	3547	3491	6448	8112	2476
Gja1	6.67122	0.598296	7.26e-06	1688	1410	1845	1734	2145	1950	1	1	2	0	8	3	20	5	1	1246	783	322				Ltk	2.17907	0.487963	7.87489e-05	552	579	290	299	362	404	105	131	137	31	69	46	42	32	55	23	19	16	387	578	205
Ppp1r36	6.7449	0.768969	7.38487e-06	116	92	59	70	78	97	0	1	0	1	0	0	1	1	0	0	0	0				P3h3	2.59107	0.660119	7.88341e-05	220	140	94	37	30	74	16	34	24	6	5	7	9	8	28	1	6	5	43	82	25
Chrm3	2.42207	0.533361	7.62576e-06	310	317	428	211	153	165	480	594	847	170	126	218	0	9	41	2	8	3				Cyp2c52-ps	-3.45081	0.764733	7.96997e-05	4	1	0	1	2	3	17	9	13	25	43	35	70	76	15	18	15	16	0	3	12
Dcun1d4	1.02267	0.199962	7.62865e-06	2718	2480	2555	2269	2599	2860	1310	1420	1130	1198	1333	1247	1737	1326	1545	2405	2010	2349				Prss36	1.73176	0.390493	7.96997e-05	242	199	157	105	99	102	139	140	122	63	85	101	63	41	98	80	104	88	191	172	123
Cerk	-1.06896	0.204238	7.99724e-06	1119	1100	1088	775	854	855	4540	4522	3729	3072	3451	3774	1429	1161	2367	1799	1766	1742				Gm8203	-1.30356	0.287351	8.13789e-05	1788	1843	2347	3097	3414	2914	3372	3309	3287	3298	3440	3868	3403	4528	2768	3229	2872	2966	1953	2473	4193
Katnal1	3.073	0.563743	8.1675e-06	335	271	309	191	245	330	109	127	162	17	27	31	31	27	78	75	73	58				Snrnp40	-1.05545	0.232958	8.27916e-05	1606	1439	1675	2038	2360	2067	2463	2561	2477	1943	2180	2456	3120	3962	2402	2597	2319	2220	1426	1990	2517
Bach1	-1.16176	0.222328	8.23145e-06	1341	1232	1524	1398	1352	1294	4310	4923	5386	4766	4601	5163	3312	3248	5699	3121	2703	2741				Eif3f	1.04052	0.232556	8.34431e-05	21935	20126	20096	13088	13797	14187	17178	17652	15198	9472	11069	11996	11088	11324	14359	14515	12604	11611	17424	18633	15746
Cdk17	1.39194	0.263038	8.27893e-06	1125	967	1049	846	1168	1256	328	314	351	229	217	249	757	644	379	572	499	434				Mbnl3	-1.29495	0.286974	8.39054e-05	407	453	508	650	582	483	811	823	959	693	685	852	992	1365	722	1029	766	756	506	666	702
Irf2bpl	1.02389	0.200803	8.28716e-06	2557	2421	2437	1979	3026	2905	1173	1383	1356	1113	1189	1221	1741	1365	1533	2889	2357	2397				1700001O22Rik	2.07165	0.465773	8.44625e-05	442	388	526	417	344	541	105	121	65	76	76	99	106	92	180	52	75	108	219	495	152
Tmem106c	1.44108	0.282185	8.29674e-06	2093	1968	1705	1261	1606	1653	1105	1216	1102	585	637	756	904	876	957	1213	1222	996				Zfp92	-3.26516	0.654162	8.59017e-05	9	16	4	13	11	9	111	91	96	283	212	202	9	13	17	49	50	41	7	6	82
Shmt2	-1.31165	0.260409	8.44192e-06	3321	3475	3481	4157	3800	3512	7931	7111	5769	4444	5085	6032	10505	13045	5852	3996	3446	3275				4732490B19Rik	2.55954	0.537407	8.60218e-05	235	229	325	234	142	119	123	119	70	45	49	61	132	106	109	121	76	72	118	268	26
Dlg4	3.39388	0.606993	8.466e-06	290	229	182	40	67	114	48	49	81	16	7	18	10	9	26	8	9	7				Itga7	3.16405	0.736198	8.6096e-05	1478	1616	604	231	149	229	169	224	85	272	249	333	75	29	232	844	1403	1473	1685	2122	383
Tm4sf20	-6.65705	0.713394	8.71607e-06	80	114	21	25	10	0	6845	8708	8848	16951	17008	15688	3086	3122	5026	10009	8821	5947				Ercc6l	-1.80299	0.399136	8.63623e-05	229	277	433	597	604	499	951	830	820	750	808	932	1136	1603	750	1064	879	1022	330	621	982
Dhh	5.04587	0.612013	8.7851e-06	565	437	349	423	570	461	2	1	1	1	15	5	34	10	8	19	8	4				2610035D17Rik	1.08006	0.240163	8.64669e-05	500	556	612	535	590	609	607	551	429	346	382	407	403	439	572	580	643	612	506	669	368
Vkorc1	1.85822	0.37487	8.91115e-06	445	383	238	265	202	219	299	282	298	129	128	162	55	101	145	86	77	87				Cyp2d37-ps	4.50587	0.895515	8.65009e-05	40	130	17	3	5	8	13	14	20	7	2	5	39	5	15	58	58	34	732	214	15
2010007H06Rik	2.74965	0.516165	8.96184e-06	1518	1518	2038	1304	645	1109	884	818	775	246	199	307	98	116	253	31	27	12				G6pc	-6.49412	0.983556	8.69453e-05	0	0	0	0	1	0	330	503	399	3045	2803	2888	0	2	4	0	0	0	0	1	1000
Dgkg	-3.72725	0.559183	9.04144e-06	12	7	1	6	5	3	339	367	405	90	126	137	117	116	261	89	104	96				Zfp57	2.80305	0.517348	8.74132e-05	1509	1325	855	1104	980	1185	23	39	19	52	106	54	800	460	159	718	335	232	1907	1534	64
Arhgap22	2.53015	0.436439	9.10366e-06	630	515	495	387	509	493	71	107	42	66	60	66	202	68	107	45	27	28				Gm13034	-1.2989	0.284602	8.84454e-05	58	66	66	71	68	71	126	104	94	107	98	100	110	155	102	124	145	109	56	60	119
Scg3	-4.98794	0.782527	9.29906e-06	2	0	0	0	0	0	105	107	93	35	38	43	9	17	32	5	4	3				Ric1	-1.20083	0.262748	8.91299e-05	1172	1217	1110	1042	1137	1059	2312	2450	2062	2917	3102	3138	2283	2090	2323	2483	2056	2037	1367	1140	2889
B4galt2	2.45125	0.436952	9.34558e-06	407	325	163	197	260	247	73	57	56	40	26	51	177	139	134	28	12	14				Bcl2l15	-4.15772	0.930969	8.93181e-05	17	20	6	43	42	34	13	7	5	268	411	301	379	333	230	6	3	1	2	2	151
Pam	1.78257	0.329666	9.41706e-06	5535	5350	5209	3887	4928	7006	1011	1241	1301	903	884	736	3601	2302	1546	12060	10139	8592				Txnip	1.39586	0.320815	8.93181e-05	19149	21381	19271	15256	11577	14299	43117	49437	44795	23621	27609	27428	15465	9106	40840	40640	38026	37905	37889	38686	48039
9330182L06Rik	2.85079	0.520464	9.52051e-06	126	190	263	229	123	115	51	82	78	24	25	38	11	26	33	8	13	9				Gcnt3	1.90326	0.418653	8.97679e-05	16221	19166	11368	16066	16357	15475	5331	5653	4988	6816	6989	6179	5923	5733	11020	3063	3589	5378	20449	11747	8092
Tmem82	-3.4745	0.541121	9.66411e-06	93	121	23	50	45	13	918	926	969	854	1010	1194	478	517	559	493	315	365				Ypel3	2.20832	0.487115	8.99493e-05	2583	2526	1413	1190	1223	1221	1116	1188	1036	494	623	542	1120	415	1136	1199	1049	1067	2279	1858	718
Eva1a	5.65139	0.736616	9.72868e-06	219	153	104	15	120	196	10	5	1	0	0	0	2	0	8	0	0	0				Fbf1	1.11003	0.246394	8.99537e-05	2838	2567	2460	1967	2463	2580	1264	1224	1155	654	768	803	995	1200	966	1310	1167	1178	1687	2334	1154
Tmem212	7.04462	0.797387	9.75799e-06	445	397	243	32	33	49	0	0	2	1	0	0	4	0	2	2	2	2				Nup85	-1.08105	0.240272	9.00403e-05	1739	1723	1829	2265	2619	2380	2978	2921	3061	2050	2505	2777	3174	4220	2315	3003	2538	2604	1850	2410	3047
Hspd1	-1.22465	0.243428	9.77169e-06	3142	3264	3814	4786	4931	4349	6753	7386	8103	6034	6524	7629	6161	8114	4897	6364	5549	5068				Rhpn1	3.31066	0.586574	9.09147e-05	275	194	193	96	199	299	5	6	3	4	10	4	12	7	7	8	8	9	194	142	4
Neurod2	-5.43529	0.840652	9.77169e-06	0	0	0	0	0	0	37	35	34	17	12	27	4	14	6	0	0	0				Evl	2.75007	0.607109	9.18288e-05	798	941	742	684	1374	1299	183	251	111	55	62	57	19	83	79	2	1	2	550	419	78
Tgfb3	9.65588	0.708526	9.78462e-06	1865	1416	3625	4312	5724	5118	1	2	0	0	0	0	3	1	0	7	15	0				Zfp174	1.33862	0.298342	9.23036e-05	176	213	194	137	227	180	122	143	140	78	79	78	75	71	101	118	104	84	156	171	113
Rnf125	-2.18604	0.3956	9.84604e-06	44	47	23	34	26	18	267	246	222	124	142	161	140	143	130	188	133	122				Tha1	1.92026	0.423718	9.24098e-05	367	381	247	124	148	136	458	465	311	397	365	500	89	111	181	201	229	197	455	579	271
Capn13	2.55111	0.47899	9.85456e-06	1443	1959	710	1367	2245	2367	555	581	455	433	485	476	141	208	467	2659	2153	967				Gm11735	-5.06429	0.906736	9.25389e-05	0	0	0	0	0	1	33	30	27	92	60	107	13	58	97	56	77	50	0	0	187
Gm26801	2.34449	0.47501	9.85456e-06	55	76	52	34	34	27	57	38	42	14	14	19	17	16	56	84	70	65				Fzd8	1.55301	0.339915	9.30772e-05	198	186	222	210	301	273	47	65	62	55	55	58	56	53	64	191	208	205	255	332	127
Ift122	2.45483	0.453682	9.89903e-06	1322	1402	888	519	750	840	334	405	319	144	138	164	257	229	229	203	217	214				Zfp607b	1.52729	0.357389	9.32189e-05	156	141	143	88	71	106	110	92	91	59	69	67	23	33	96	107	90	93	45	110	75
Krt39	-3.80982	0.696656	1.00005e-05	0	1	0	0	4	2	6	5	5	15	18	4	67	31	14	136	99	99				Pcyt2	-1.3136	0.292186	9.46754e-05	3389	4066	4054	3752	3689	3335	7633	7756	5718	9597	10181	11139	4719	5898	3761	6086	5446	5103	3749	4963	8883
Myrf	1.68687	0.316363	1.00425e-05	17656	18527	16400	10733	14496	14235	7403	7039	6010	3883	4857	4730	5303	5545	4506	0	11	3				Cyp2b13	-2.84326	0.695774	9.50862e-05	1	1	0	3	1	0	22	26	13	48	58	47	1	1	1	1	2	0	3	4	11
Lcp1	1.77695	0.346739	1.00559e-05	2930	3509	3906	3033	2126	3313	1836	2120	2017	1333	1203	1386	489	881	905	68	118	59				Gsto2	2.24093	0.484607	9.50862e-05	96	77	82	58	69	59	15	17	16	18	15	12	13	4	18	62	29	47	56	71	30
Ldhb	4.51317	0.587505	1.00944e-05	234	222	240	123	380	247	8	6	15	2	3	3	10	8	3	3	7	2				Sned1	2.68975	0.663629	9.50862e-05	522	518	378	131	205	212	76	77	59	12	23	25	90	55	75	149	148	99	610	534	268
Eml3	1.03809	0.204608	1.01133e-05	3056	3029	2745	2128	2901	2850	1513	1485	1453	979	1180	1125	1782	1834	1378	1889	1436	1449				Ifitm1	4.37823	0.792822	9.55856e-05	78	58	117	13	15	42	10	8	6	2	5	1	4	3	1	1	2	5	207	130	4
Slc39a13	1.85754	0.349308	1.01133e-05	933	776	787	734	1006	880	348	269	316	174	162	193	296	309	266	297	174	139				Wdr62	-1.37309	0.3126	9.65832e-05	182	281	292	351	333	280	404	410	462	349	422	456	875	1110	367	765	632	663	246	475	466
Bnip2	1.02397	0.199208	1.01202e-05	1927	1802	1857	1508	2131	2046	753	660	669	511	594	571	1074	948	571	954	756	682				Cdr2	-2.6471	0.591414	9.86365e-05	337	298	279	571	561	409	1091	1216	1195	4467	4550	4456	401	484	332	258	242	225	486	441	1573
Nod2	2.80629	0.511579	1.01202e-05	417	372	371	346	447	392	164	156	142	50	45	33	117	80	173	80	76	107				Ces2a	-4.93466	0.76333	9.92444e-05	27	75	3	5	2	3	27070	22295	16260	10496	11906	9838	309	519	6051	543	900	891	27	19	7415
Sval1	-4.85076	0.823131	1.02474e-05	0	0	0	0	0	0	46	29	56	49	80	51	48	95	474	290	275	114				Apoa1	-6.42093	0.971116	0.000100992	1	5	2	0	1	2	8737	11490	9037	75943	68886	56587	77	538	3824	0	12	3	5	45	19586
Rnf144b	3.37835	0.554023	1.03056e-05	1325	1320	851	499	520	598	219	156	265	48	86	78	16	10	16	4	3	3				Nat8f5	-5.28247	0.965793	0.000100992	0	0	0	0	0	0	71	96	107	506	353	369	0	4	3	0	0	2	0	0	98
Avpi1	1.14153	0.22183	1.03861e-05	2519	2544	2822	2839	3080	2649	790	995	808	1091	1000	1015	1227	1215	959	963	805	667				Cerk	-1.03224	0.223101	0.000101345	1119	1100	1088	775	854	855	4540	4522	3729	3072	3451	3774	1429	1161	2367	1799	1766	1742	997	781	3742
Fam13a	-3.13652	0.489883	1.04015e-05	423	557	386	394	124	152	7216	7304	7539	7251	7521	6879	2250	1755	4869	2612	4939	4176				Cdsn	5.06267	0.998321	0.000102944	7	14	1	1	1	0	24	16	18	3	12	9	50	19	48	12	6	7	97	3	0
A030001D20Rik	3.48678	0.568101	1.04472e-05	104	125	116	42	65	85	13	12	14	6	4	5	10	10	7	33	70	29				Atxn10	1.40571	0.308938	0.000103188	4910	4485	4898	3926	4859	4633	1928	2183	1964	972	1204	1142	2553	2053	1802	2399	1891	1610	4500	4771	1792
Ncoa7	1.59041	0.308966	1.05915e-05	758	772	711	636	682	771	266	280	272	271	324	266	282	463	377	372	581	592				Adam15	1.06745	0.241117	0.000103476	2349	2394	2034	1313	1867	1824	1389	1365	1147	995	1018	1224	1099	1307	1436	2202	1989	1570	2237	1899	1832
Amigo3	-1.62782	0.315934	1.06063e-05	47	51	42	37	65	54	126	161	171	111	127	115	86	124	71	61	49	47				Zc3h3	1.40159	0.31119	0.00010446	338	366	256	192	214	211	229	217	158	161	187	160	177	139	175	250	203	181	324	455	226
Etv1	2.45486	0.506818	1.06063e-05	78	91	95	64	23	41	44	66	87	28	28	34	9	33	78	7	8	6				Map3k12	1.52779	0.346749	0.000104485	291	314	217	143	213	237	129	110	108	99	87	96	49	27	90	96	92	62	113	170	90
Cst6	-6.06579	0.761097	1.07081e-05	2	0	0	1	2	0	64	69	66	352	344	270	13	14	50	35	37	47				Ccdc117	1.09848	0.244817	0.000104678	1417	1542	1707	1458	1232	1390	1083	1155	1613	825	934	1090	761	987	917	1137	1022	984	1363	2043	978
Siah1b	-1.4742	0.297191	1.07244e-05	94	123	120	167	177	187	225	209	217	191	222	234	345	480	193	231	194	195				Leap2	-5.6574	1.00869	0.000105425	0	0	0	0	0	1	88	117	120	1338	1125	1263	0	1	1	0	0	0	0	0	211
Gm21885	-7.23315	0.768415	1.08206e-05	2	0	2	2	1	1	355	359	222	2072	2121	2002	15	50	224	25	14	35				Cacna2d1	-3.62044	0.681581	0.000105507	18	12	11	16	47	10	161	203	213	87	73	74	67	73	131	3	19	12	8	5	212
Ptpn14	3.04382	0.488862	1.09238e-05	4942	4350	5869	4986	5675	5515	356	522	560	146	231	186	1637	1389	489	1042	801	526				2310040G24Rik	-2.12912	0.450262	0.000105894	20	21	31	40	36	31	154	214	165	99	123	125	41	72	68	17	11	8	39	36	135
Msrb3	4.31075	0.593695	1.09573e-05	98	143	146	133	333	281	8	3	5	1	2	4	18	21	8	11	5	8				Cyp2c40	-4.87266	0.900826	0.000105977	0	0	0	0	0	1	46	38	40	64	66	62	1	2	5	27	15	7	0	0	31
Gm12892	-4.25692	0.65711	1.10743e-05	27	30	52	208	298	173	1029	1068	856	3783	3640	3914	317	509	353	379	365	290				Igfbp3	4.04885	0.769656	0.000106123	490	284	1342	135	865	602	6	19	6	15	12	18	34	13	22	68	25	19	1899	465	46
Zdhhc8	2.81111	0.498627	1.11316e-05	1489	1444	1497	1092	1633	1662	441	375	278	110	113	132	281	421	279	348	241	382				Pcnx4	1.24004	0.274231	0.000106123	516	474	367	404	564	423	220	282	239	150	145	162	297	274	235	475	368	327	437	472	213
Cyp2b10	-4.45895	0.606224	1.12158e-05	234	372	111	99	65	80	4122	4538	3305	10565	11131	11191	143	195	375	321	248	143				Zfp879	2.93688	0.8396	0.00010649	39	48	11	5	10	10	22	19	9	1	1	2	0	2	7	7	2	3	15	16	3
Nefh	2.43435	0.461585	1.12158e-05	114	109	82	95	125	102	39	47	36	19	26	23	27	53	56	35	103	47				Fam72a	-1.89345	0.433717	0.000106808	26	51	48	91	96	64	105	109	109	100	100	83	154	231	72	101	86	90	49	63	104
Kif26b	4.37403	0.662549	1.12543e-05	85	65	332	262	523	626	9	22	13	16	19	16	127	176	557	46	86	230				Fjx1	3.53084	0.67836	0.000106808	252	203	265	57	294	168	1	11	3	4	5	9	1	6	4	0	1	6	153	163	12
Celsr2	1.70226	0.327989	1.13709e-05	2003	1991	2202	1456	1969	2062	947	834	927	400	487	605	886	964	785	452	457	451				Ncapd3	-1.11048	0.246811	0.000106847	1332	1323	1706	1864	1682	1741	3083	2988	3184	2155	2340	2865	2626	3429	2350	2931	2486	2329	1229	1862	2784
Phldb2	1.21374	0.230507	1.13709e-05	5823	5259	4447	5379	6797	6025	921	1181	951	908	1284	893	5933	4131	1927	3522	2469	1917				Tmc4-ps	1.14126	0.254911	0.000107392	182	173	140	107	130	125	138	133	150	110	101	114	112	105	114	214	186	165	156	139	88
Obscn	-3.79275	0.629184	1.14528e-05	0	2	3	0	1	2	54	88	70	25	37	59	21	24	47	5	10	6				Dusp23	1.39642	0.320868	0.000107434	266	214	197	186	147	155	276	245	219	125	118	141	58	48	125	169	138	160	162	187	146
Itih2	7.98318	0.762627	1.14845e-05	229	260	451	99	271	356	0	0	1	0	0	0	1	1	0	4	6	1				Hells	-1.59384	0.356595	0.000107596	1169	1497	1996	2443	2579	2221	3588	3877	4484	2944	3498	3617	4482	6888	3274	3808	3557	3484	1380	2423	3596
Plxnb1	2.36836	0.436347	1.15448e-05	5788	4794	5826	3017	6185	5293	1561	1890	1665	625	684	832	1263	1740	1277	971	747	679				Cuedc1	2.04549	0.466884	0.000109554	1154	1125	881	758	1089	1101	367	437	401	179	130	162	378	381	613	211	177	93	627	1052	270
R3hdm4	1.26703	0.250913	1.15485e-05	7874	8671	5848	5743	5437	5191	3589	3631	2825	2468	3024	2881	4871	3986	4274	7735	7036	6866				Muc5b	5.18639	1.02097	0.000110099	305	103	87	1	11	5	2	1	1	0	0	0	0	1	0	0	1	0	739	35	2
Hebp2	2.32199	0.425088	1.16953e-05	353	427	290	248	229	263	49	62	54	51	72	116	52	53	60	196	238	133				Chit1	6.7431	0.749376	0.000110408	878	960	2627	3031	4060	2980	0	0	0	9	10	3	17	6	2	38	27	14	1411	2277	0
Slc9a1	1.5353	0.298259	1.16953e-05	6858	7554	8420	4267	4627	5420	2559	2498	2163	2009	2215	2356	2539	2660	2206	3154	2819	3064				Prickle3	1.40302	0.316066	0.000110408	615	632	516	419	370	429	457	398	348	199	247	289	358	265	349	439	357	402	564	627	390
Vmac	1.75491	0.355791	1.16953e-05	691	739	655	463	557	652	585	611	648	268	248	282	201	236	428	496	374	321				AC133889.1	2.17673	0.449971	0.000111544	69	91	76	62	67	66	12	9	7	14	9	5	27	19	15	22	20	11	72	65	13
Prune1	1.04627	0.207847	1.18096e-05	1794	1782	1625	1930	2241	2017	833	884	748	876	874	989	1115	1031	1110	2544	2031	1882				1700066M21Rik	-1.01265	0.22916	0.000111639	231	243	232	358	306	281	222	220	235	246	264	275	347	423	222	442	438	402	242	243	299
Uhrf2	1.0517	0.210568	1.18096e-05	3235	3539	3659	3470	3976	3547	2375	2472	2396	1425	1667	1699	2216	2331	2282	3941	3346	3286				Rab30	-2.9234	0.618329	0.000111772	43	40	47	75	73	56	224	238	227	617	809	567	67	69	92	75	54	37	34	61	179
Zfp467	2.08106	0.431044	1.18597e-05	654	836	633	292	235	352	606	623	551	269	276	251	200	166	634	288	286	286				Idh3a	-1.1581	0.259781	0.000111918	3808	3913	4397	6292	6062	5183	7566	7785	7852	8711	8776	9759	7345	8876	6716	11411	9961	8733	4561	4585	8084
Cyp2c40	-5.90181	0.816846	1.18916e-05	0	0	0	0	0	1	46	38	40	64	66	62	1	2	5	27	15	7				Cxcl5	6.21376	0.949021	0.000112343	6754	5625	3556	328	1631	6269	0	0	0	0	0	2	17	26	1	216	117	57	369	2628	1
Skap2	1.08158	0.219298	1.18916e-05	2096	2048	2464	1959	1874	2187	1481	1627	1518	1495	1679	1583	1112	1156	1926	4330	4024	3656				Tlr1	-2.24605	0.499126	0.000112343	0	1	6	14	11	5	39	41	58	34	40	25	312	313	231	2135	2203	1779	9	10	32
Fgd4	-1.00234	0.200617	1.19321e-05	1026	1196	1018	1235	1034	875	1769	1844	2202	1919	1967	1924	1686	1891	1465	2422	1981	2032				Ptpru	2.30421	0.528944	0.000112706	77	51	58	75	44	63	120	124	114	39	30	50	19	39	51	31	29	18	191	243	77
Upk3bl	2.85658	0.525751	1.20402e-05	63	42	48	37	33	30	8	21	6	9	12	5	21	12	43	49	27	29				Defa27	-5.19048	0.928987	0.000113954	0	0	0	0	0	0	73	85	160	228	169	187	20	42	170	0	0	0	0	0	104
Ccdc136	3.15698	0.515272	1.22056e-05	188	167	173	109	97	99	8	21	7	16	14	8	28	21	15	18	21	12				D130043K22Rik	-4.69652	0.887109	0.000114698	0	0	0	0	2	0	89	128	87	777	640	665	12	17	40	367	373	364	2	0	115
1700108F19Rik	-5.23434	0.775932	1.24139e-05	1	1	1	0	0	0	8	13	7	21	35	40	9	5	2	5	5	1				Urah	2.04104	0.448021	0.000114698	715	741	562	323	541	507	353	374	244	188	182	170	302	253	407	238	261	243	250	372	49
Cpq	2.06847	0.474248	1.2447e-05	647	642	516	118	209	184	804	967	770	400	408	421	6	22	90	168	232	229				Gm8396	-1.26214	0.280503	0.000114845	137	131	112	178	169	155	329	321	317	223	213	281	262	413	251	319	266	245	128	158	328
Nr3c1	-1.12161	0.217946	1.24864e-05	1705	1730	1875	1609	1422	1160	6284	6415	7078	5281	5253	5654	3052	3155	4921	3605	3405	4191				Med14	-1.00084	0.224704	0.000115371	1849	1999	2403	2595	2800	2621	3490	3248	3254	3077	3546	4098	3865	4804	3707	4138	3548	3561	2223	2716	3614
2310016G11Rik	-3.22271	0.536339	1.25113e-05	5	11	5	6	2	1	74	74	58	90	113	93	32	38	63	54	81	53				Tnip3	2.73742	0.538678	0.000117483	2177	1413	1968	1904	3747	3630	19	33	12	39	80	36	532	266	186	4341	3039	2240	588	843	39
Tigd4	-2.37074	0.460074	1.25409e-05	12	7	14	11	12	11	18	26	18	22	44	42	67	54	26	35	25	27				Ncoa7	1.67551	0.371899	0.000117642	758	772	711	636	682	771	266	280	272	271	324	266	282	463	377	372	581	592	642	406	268
Retsat	-2.00213	0.370655	1.26398e-05	851	1045	811	729	752	940	3333	3605	2648	4616	5446	5203	919	1029	1290	1970	2146	1744				Zfp119a	1.15273	0.260347	0.000118118	226	215	197	141	163	185	173	171	204	119	116	134	147	138	179	210	170	158	148	226	107
Myo3b	6.69758	0.800201	1.27271e-05	210	108	161	9	25	77	0	0	2	0	0	0	1	0	1	1	0	3				Cabp1	-2.99432	0.632843	0.000118147	1	0	0	6	0	2	60	57	60	49	51	65	89	113	101	5	9	15	0	8	62
Lamc2	1.54988	0.288354	1.27865e-05	19374	17362	19906	16164	23927	23379	2280	2608	2219	3275	4054	2766	16330	9682	5556	16655	12651	12119				Paqr6	3.88343	0.746028	0.000118312	111	110	105	83	86	109	4	10	11	1	0	0	5	6	3	8	2	3	41	212	7
Pappa2	-6.03628	0.813998	1.29601e-05	1	0	0	0	0	0	231	344	647	135	118	189	5	12	85	54	41	10				Lnpk	-1.0134	0.229776	0.000118581	458	440	504	667	635	558	527	599	581	676	715	700	822	908	580	922	785	634	475	512	703
Zdhhc1	2.29319	0.453591	1.31217e-05	1256	1230	865	504	571	839	583	586	609	189	195	253	204	202	338	336	328	303				Gm16348	2.54492	0.707395	0.000118679	30	29	65	13	6	13	59	52	45	14	7	10	1	8	19	29	24	19	23	45	20
Clmn	1.73987	0.342021	1.31875e-05	7110	6965	9826	5164	5202	5952	2936	2881	2672	2913	3126	3205	2963	2019	4263	9826	8413	6870				Prickle1	3.0339	0.637347	0.000118679	147	155	104	149	174	128	12	16	16	4	8	4	35	20	21	38	43	10	62	191	22
Fignl2	3.16367	0.557651	1.32301e-05	388	349	198	74	144	170	38	30	29	73	48	46	25	16	67	53	61	54				Uhrf2	1.04646	0.234605	0.000118814	3235	3539	3659	3470	3976	3547	2375	2472	2396	1425	1667	1699	2216	2331	2282	3941	3346	3286	4717	3541	2109
Slc15a1	-5.88339	0.678628	1.3236e-05	5	2	8	3	9	5	399	602	476	2446	1786	1525	22	50	309	372	289	146				Gja1	4.73681	0.699064	0.000118848	1688	1410	1845	1734	2145	1950	1	1	2	0	8	3	20	5	1	1246	783	322	1343	1681	23
Ppa1	-1.61757	0.318833	1.3379e-05	2361	2443	2173	3387	4125	3249	5834	6046	6033	7271	7621	8009	4231	5351	3982	7196	5745	4586				Aunip	-1.64464	0.371867	0.000120332	69	60	100	121	83	61	238	233	241	201	210	272	166	271	108	264	216	226	86	149	284
Six5	1.94981	0.38485	1.3379e-05	677	624	581	302	379	436	334	348	261	141	141	183	180	178	240	189	166	142				Mmp7	-4.69771	0.851678	0.000120448	73	48	560	41	39	44	2693	3675	3850	6698	6174	5679	5946	8719	19647	320	466	1230	15	32	2351
Hsd17b7	-2.04969	0.404288	1.35033e-05	905	1062	948	1359	1792	1430	1819	1921	1493	3588	3394	3294	2854	2901	1545	3929	3610	3200				Kcnf1	-2.20873	0.482783	0.000123613	20	44	33	62	30	35	318	415	342	265	253	332	153	226	135	218	208	95	42	32	222
Mme	-6.08318	0.648897	1.37624e-05	3	6	9	14	19	12	2350	3106	3553	6459	4407	5488	3	5	92	5	4	1				Tfcp2	1.10491	0.254708	0.000123764	781	767	614	416	595	639	537	508	416	280	307	325	237	349	456	609	466	499	429	615	450
Otud1	2.42187	0.465419	1.3774e-05	114	134	93	124	120	108	55	62	62	19	27	14	43	35	75	122	88	96				Cndp1	-4.86472	0.810326	0.000124351	0	0	0	0	0	0	179	160	163	225	216	217	3	8	43	1	3	0	0	2	257
Suz12	-1.12048	0.226476	1.38e-05	2926	2992	3416	4192	3939	3512	5250	5714	5205	6015	6045	6563	6359	7592	5309	6242	5508	5584				Hoxaas3	-4.82644	0.866508	0.000124531	0	0	0	1	0	1	15	16	13	18	17	26	7	23	76	298	290	526	0	0	108
Fggy	2.3989	0.472815	1.38911e-05	662	547	528	278	377	594	262	326	299	95	92	102	155	172	262	389	398	487				Tmem150a	2.89201	0.615376	0.000126923	756	707	235	104	185	207	76	63	62	65	54	52	51	48	53	45	35	20	335	466	71
Trappc2	1.43296	0.283941	1.39521e-05	249	250	153	185	194	170	83	93	107	92	68	74	106	116	107	196	165	142				Mrc1	-3.48591	0.712131	0.000127859	41	39	15	45	38	53	125	142	61	313	422	246	847	388	644	384	144	95	40	59	936
Liph	1.47247	0.291861	1.4029e-05	3914	4774	2999	3295	2573	2926	1463	1504	1527	1686	1683	1550	1609	1407	1944	2331	1938	1517				Gm10169	-1.23495	0.277134	0.000128755	846	829	1064	1186	1152	1097	1464	1312	821	1276	1363	1465	956	949	798	1365	1290	1174	849	909	1623
Tcaf1	1.74454	0.342373	1.4029e-05	1215	1154	1133	993	1388	1075	562	554	633	279	246	345	551	544	541	1727	1544	1716				Gm13135	-1.00331	0.225921	0.000130604	101	104	110	130	133	130	170	160	161	148	142	155	169	231	170	220	188	181	99	114	173
3830403N18Rik	1.60379	0.996291	1.41058e-05	0	14	0	107	0	0	0	0	0	0	0	0	0	0	6	0	0	0				Rnf169	1.16512	0.26006	0.000130604	2004	1689	2032	1536	2026	1996	854	881	998	541	644	600	1448	1281	1055	1139	985	832	1985	1662	823
Prrx2	7.04843	0.749733	1.41491e-05	120	112	289	36	103	258	2	0	0	0	0	1	0	0	1	0	0	0				AC154760.1	2.82031	0.638317	0.000131	53	28	34	40	31	37	15	32	22	8	10	3	3	6	13	14	10	2	34	50	17
Il6ra	2.45191	0.448877	1.41518e-05	178	173	68	141	134	100	30	40	32	22	17	17	56	48	45	40	44	42				Cep152	-1.10267	0.248134	0.00013193	275	321	346	297	330	321	643	624	680	424	428	508	626	801	497	641	469	498	251	352	559
Trim30d	-3.9275	0.575634	1.42956e-05	45	23	17	13	10	7	313	357	393	891	743	703	143	150	322	754	732	654				9830132P13Rik	4.96993	0.869877	0.00013265	31	34	22	26	35	29	2	4	1	0	1	0	2	2	0	1	4	3	23	32	0
Rap1gapos	2.2486	0.431591	1.43002e-05	78	67	69	100	71	68	36	41	44	19	31	24	18	13	41	6	6	8				Cenpi	-1.78439	0.399205	0.000132963	224	262	388	594	506	489	649	571	556	510	597	706	866	1109	646	903	821	737	215	447	797
AC140346.1	-5.37739	0.840214	1.44949e-05	0	0	0	0	0	0	18	36	15	41	25	25	8	7	15	0	0	0				Frem2	4.47819	0.798971	0.000133091	28	23	30	2	18	14	3	8	8	1	1	7	0	1	1	0	0	1	30	74	1
Gm36945	-2.64928	0.447965	1.45326e-05	18	46	21	39	14	15	501	522	506	309	273	340	131	110	295	71	40	66				Igfbp5	3.37045	0.839994	0.000133383	443	355	310	30	43	39	8	16	7	3	3	5	6	6	9	0	1	0	1020	222	40
Carmil1	-1.0951	0.221127	1.45402e-05	1671	1767	2045	1912	2359	2103	3377	3452	2988	3527	3966	4161	4049	4330	3746	2875	2376	2222				2010007H06Rik	2.43476	0.553295	0.000134356	1518	1518	2038	1304	645	1109	884	818	775	246	199	307	98	116	253	31	27	12	837	1396	265
Cdr2	-3.25095	0.565157	1.45402e-05	337	298	279	571	561	409	1091	1216	1195	4467	4550	4456	401	484	332	258	242	225				Prkar2a	-1.23335	0.275747	0.000134356	3429	3559	3903	4721	4478	4296	8003	8515	8924	10229	10783	11846	7288	9589	9288	10345	9555	9032	4941	5081	12749
Rubcnl	4.19683	0.681712	1.46759e-05	32	13	53	22	33	21	1	1	0	4	2	2	4	7	17	15	13	5				Pvt1	1.49476	0.332022	0.000135066	453	363	380	343	402	372	130	209	220	98	117	115	385	264	251	235	207	176	464	572	225
Gm49417	3.82918	0.662743	1.47054e-05	167	155	110	51	69	96	31	16	24	1	1	2	3	12	13	3	2	2				Lrfn3	1.6339	0.379467	0.00013751	1014	1005	796	650	650	809	594	576	417	593	714	751	344	353	796	568	584	536	1034	1255	1108
Dync2h1	1.21566	0.246795	1.47826e-05	676	673	597	448	560	544	369	447	482	313	278	343	342	241	396	800	668	627				9530034E10Rik	4.60166	0.815847	0.000138668	52	76	55	104	50	34	4	7	5	23	26	23	18	8	22	0	0	0	126	113	0
Klhl7	1.23468	0.249321	1.47826e-05	823	825	804	754	678	656	538	508	593	309	329	361	371	381	400	461	432	428				Gucd1	-1.35756	0.295388	0.000138949	629	672	466	486	669	602	3867	3999	3360	3968	4370	4190	1764	1513	3534	3026	3084	3396	662	806	3551
Myo1a	-3.49259	0.521725	1.51859e-05	886	1751	679	850	292	454	20234	22818	21431	29027	35268	29972	4911	6197	20697	13880	13249	9743				Dstyk	1.42023	0.324162	0.000139755	972	887	850	585	657	741	471	527	603	260	263	314	461	477	442	492	469	471	687	912	426
Pde4a	2.76622	0.486121	1.5339e-05	634	579	526	460	515	721	150	125	69	68	69	62	141	36	106	99	91	69				Chic1	-2.49585	0.51553	0.000140146	18	8	14	3	9	8	257	252	319	330	382	356	649	713	1004	252	350	648	32	49	531
Lct	-8.13651	0.819599	1.53738e-05	2	6	2	0	2	4	134	230	358	10538	7035	7621	5	6	12	3	1	1				Polq	-1.88174	0.423668	0.000140424	153	196	276	377	338	264	501	460	611	378	479	522	550	839	404	572	516	568	141	343	478
Hoxa4	-4.32518	0.820555	1.55032e-05	0	0	0	0	0	0	10	10	10	13	10	19	8	18	18	44	40	55				Gm10087	-2.86901	0.631179	0.000142037	5	9	2	13	13	8	25	16	11	14	12	25	31	38	15	18	21	24	3	6	27
9330102E08Rik	3.33832	0.562681	1.5516e-05	77	61	47	37	29	39	6	5	6	6	7	4	11	6	13	20	7	7				Gm36738	1.97882	0.489692	0.000142311	124	94	135	79	34	35	85	96	121	91	79	88	13	21	88	123	101	107	78	87	91
Smarcd3	3.01836	0.566909	1.5567e-05	265	231	218	107	134	178	66	91	101	17	11	27	14	22	32	15	15	9				Gm14325	1.37882	0.322307	0.000142512	233	170	150	139	136	137	228	214	265	107	120	131	141	168	237	202	193	204	163	211	156
Abcb8	-1.06742	0.217142	1.5673e-05	2130	2228	2683	2656	2604	2481	3919	4080	3272	3920	4267	4826	3497	4285	2918	4464	4087	3660				Cnksr2	3.12432	0.73316	0.000143584	208	207	151	34	106	189	5	13	12	0	8	1	0	1	1	4	0	0	87	141	26
Cnnm1	-6.00744	0.74521	1.5673e-05	1	2	0	3	0	0	632	544	668	80	109	94	14	30	37	21	24	8				Incenp	-1.60131	0.365199	0.000146132	1279	1573	2486	2722	2632	2433	3859	3571	3229	2403	2881	3265	4725	6609	2770	4087	3493	3377	1401	2435	3984
Lyar	-1.32458	0.272305	1.57956e-05	829	828	865	1345	1392	1226	1324	1456	1503	1450	1531	1784	2018	2624	1244	1566	1288	1356				Enpep	-5.58304	0.979737	0.000146291	0	0	0	0	0	0	970	942	1235	10756	10657	9343	98	388	2765	20	17	8	0	4	3333
Smim1	3.08714	0.591698	1.59796e-05	177	181	110	41	50	95	81	53	33	16	15	19	3	13	19	1	4	0				Sox2ot	5.30375	0.987159	0.000146291	25	30	45	14	4	24	0	0	0	0	1	0	0	0	1	0	0	0	12	75	0
Plin5	4.16863	0.609589	1.62788e-05	218	229	71	75	75	57	16	9	7	11	4	5	3	2	4	17	7	29				Gm7696	4.91922	0.918433	0.000147139	10	12	38	10	15	56	7	3	2	1	3	1	1	0	3	12	4	4	64	32	1
Crim1	1.36738	0.274929	1.66036e-05	3456	3448	4160	2586	3244	3674	2221	2184	1935	1221	1346	1396	1981	1726	2032	2443	1925	1924				Fam189b	2.02569	0.462263	0.000147771	763	811	614	414	498	640	359	392	278	164	125	146	390	339	449	198	111	287	725	687	275
Prrx1	-7.59563	0.859808	1.67558e-05	0	0	0	0	0	0	68	107	55	434	337	389	1	2	8	1	0	0				Aox1	5.67033	0.897001	0.000147875	604	566	401	411	293	364	0	0	0	1	0	0	8	4	0	0	0	0	87	104	0
Fjx1	4.92059	0.639367	1.69326e-05	252	203	265	57	294	168	1	11	3	4	5	9	1	6	4	0	1	6				Dgkg	-3.75404	0.704776	0.000147875	12	7	1	6	5	3	339	367	405	90	126	137	117	116	261	89	104	96	2	2	187
Ppef1	-3.63192	0.642198	1.71035e-05	4	3	5	18	19	19	139	131	43	59	51	88	84	21	11	19	35	8				Neu3	-2.78634	0.554171	0.000147875	50	46	65	40	42	68	755	805	505	1346	1166	1546	19	15	55	16	15	15	56	54	710
Pitpnm3	2.93465	0.516454	1.71475e-05	2761	2725	2156	1582	1661	2096	427	526	405	109	147	166	978	533	568	1148	1015	971				Eva1c	3.19134	0.602627	0.000148344	1051	933	1143	930	1332	1432	6	22	5	33	32	9	207	146	45	313	203	176	717	560	39
Ano8	1.41218	0.283847	1.7232e-05	1094	1166	884	733	1344	1254	547	636	675	367	389	479	658	679	749	851	760	685				Htr4	-4.71467	0.780821	0.000148691	0	0	1	0	3	0	57	38	46	90	71	119	299	425	535	210	156	146	1	0	78
Gm47949	1.35963	0.266277	1.7232e-05	525	527	538	554	648	587	162	155	132	180	217	195	191	162	156	208	218	176				Dcaf15	-1.04597	0.237676	0.000149514	1058	1081	910	884	944	900	1734	1763	1469	1947	2216	2344	2362	2316	1866	2769	2457	2325	1059	1246	2463
Aire	3.02376	0.544636	1.72526e-05	134	153	61	140	63	74	31	38	20	16	10	10	33	18	48	34	31	17				Spink1	-6.01327	0.981087	0.000149769	0	0	0	0	0	0	62	141	206	877	658	563	2	6	63	16	16	17	0	0	501
Zfp839	1.04353	0.217081	1.74195e-05	558	540	443	350	386	393	523	479	469	338	329	396	319	262	523	447	392	339				Gaa	1.06004	0.24594	0.000151988	7791	7484	7582	4589	4631	4832	3843	4141	3545	2426	2749	3114	2408	2580	3082	3501	3005	2892	4597	5490	4608
Pdgfc	2.94693	0.491873	1.74321e-05	762	648	939	434	550	574	30	60	24	68	53	59	237	138	96	313	382	557				Chst12	2.163	0.460527	0.000152633	208	166	87	145	159	142	30	24	11	9	18	9	27	17	17	76	69	60	139	164	30
Cdhr2	-3.16711	0.540829	1.74635e-05	1893	2287	1002	3947	4510	3276	12979	14778	13873	31945	29551	27235	18538	11522	17099	44652	41742	41933				Slc26a9	6.91175	0.901339	0.000152687	4552	4105	3764	5290	6424	4009	0	1	2	3	2	0	9	0	0	1	19	4	1962	1957	3
Phf21a	1.15578	0.235156	1.75764e-05	2100	2132	2091	1646	1631	1577	1280	1321	1136	870	950	910	1313	949	1283	1399	1225	1187				Gm6982	-1.83743	0.414948	0.000153189	22	34	42	41	37	35	89	66	79	57	52	83	89	130	54	71	60	74	22	34	87
Chst15	2.14764	0.418711	1.77411e-05	904	755	1267	755	854	732	407	507	274	213	189	266	475	254	570	1135	1476	1218				Gm5391	-1.3034	0.300441	0.000153292	404	412	454	679	795	590	727	775	752	638	653	842	952	1276	641	840	807	711	509	702	772
Car2	2.87847	0.464541	1.79669e-05	24040	31069	14035	18012	13774	12649	601	896	654	1029	985	829	3741	1926	543	86561	72286	50864				Snrk	-1.07491	0.245889	0.00015335	745	686	681	801	811	628	1116	1180	1065	1298	1277	1289	1791	1518	1257	2074	1608	1625	873	534	1220
Mptx2	-8.21422	0.888454	1.81032e-05	0	0	0	0	0	0	148	181	438	2550	1539	2666	67	370	932	2	4	0				Card10	1.08339	0.249983	0.000154974	5032	4660	4118	3243	4685	4223	2427	2493	2642	1416	1643	1775	2538	2398	2566	3729	3026	2752	2674	3188	2329
Stxbp6	1.14137	0.235781	1.81534e-05	900	1014	768	928	716	794	751	743	813	456	500	521	669	633	932	1243	1137	932				Zfp248	1.8037	0.396643	0.000155097	128	132	85	112	136	91	19	27	20	15	20	17	39	51	37	33	43	29	70	107	25
Ncmap	3.04096	0.50664	1.82786e-05	1563	1462	1481	500	630	669	84	107	74	98	111	120	106	51	50	238	212	254				Mup20	-6.29704	0.984492	0.000156352	0	0	0	0	0	0	3	4	8	5	9	5	0	0	0	0	0	0	0	0	11
Pdlim4	4.35816	0.646956	1.8532e-05	864	853	803	476	543	505	33	79	54	6	4	9	17	18	14	63	34	12				Cxcl15	5.38169	0.896236	0.000156392	144	81	106	18	28	44	0	0	0	0	0	0	0	2	0	1	0	1	54	180	0
Svip	-1.13136	0.222117	1.86158e-05	536	536	509	507	427	417	2749	2598	2819	1696	1512	1768	641	703	1144	864	798	718				Mucl3	5.87964	0.94338	0.00015823	5449	12940	2081	577	1611	1144	14	34	23	180	123	87	10	19	16	12	5	0	50677	11163	40
Slc4a4	2.26531	0.434212	1.86217e-05	15700	13525	15828	10263	14239	14756	5264	5980	4669	4454	4145	4619	3525	2319	5349	337	693	1181				Aifm2	1.06218	0.244355	0.000158375	704	681	604	477	478	485	341	397	424	329	343	380	435	352	477	528	471	438	445	672	465
Ddc	-3.04658	0.522454	1.86958e-05	297	572	165	360	146	97	2449	2551	2368	1989	2467	2435	2575	2020	1547	2007	1470	1041				Noct	-1.16322	0.273655	0.000159113	547	451	593	630	753	630	413	432	360	642	622	657	901	805	379	800	618	588	587	467	547
Ica1	1.75769	0.344625	1.86958e-05	1638	1742	1618	1823	1605	1560	595	761	836	319	438	365	944	902	822	1234	1059	919				Cfap45	3.74395	0.642853	0.000160702	208	166	208	260	315	242	2	2	1	0	6	2	5	3	3	0	0	3	65	74	6
Slc22a13	-5.14004	0.770114	1.86958e-05	0	0	0	2	2	0	6	9	7	53	64	70	1	1	0	5	4	0				Bbox1	-4.61785	0.937223	0.000160827	0	0	0	0	0	0	43	63	68	129	139	186	3	2	4	10	0	1	0	0	21
Pklr	-3.79321	0.585406	1.88277e-05	1404	1844	1194	1510	1698	1087	9472	10572	10723	42237	41088	44919	5088	4856	8452	5790	5096	4638				Nceh1	2.1144	0.463024	0.000160827	3099	3074	3422	2510	2535	3200	1708	2131	2263	703	793	743	910	817	644	816	733	812	2251	3580	629
Ociad2	1.1341	0.231952	1.88511e-05	7797	7475	6910	6811	6224	6932	4956	5328	4558	3466	3561	3983	2140	1932	2304	2602	3265	3741				Tubal3	-3.28453	0.637414	0.000161023	37	37	6	9	30	18	906	962	862	1070	1078	1079	175	245	583	65	91	64	64	8	1060
Jaml	-2.94689	0.507026	1.88639e-05	277	220	573	929	437	476	5709	6311	5907	4277	4256	5185	1844	2195	2985	821	414	334				Eda2r	2.37505	0.52262	0.000163781	1783	1461	2647	1707	2127	2558	133	202	324	88	110	156	894	624	589	1196	1114	619	1931	1112	388
Tfpi2	-5.52442	0.832068	1.88639e-05	0	0	0	0	0	0	49	64	49	73	73	72	2	10	34	8	17	4				Fyn	-3.36541	0.644814	0.000163819	19	12	3	6	10	9	35	31	41	26	33	12	23	34	26	4	2	0	18	8	446
Pnkd	1.52577	0.310091	1.90844e-05	1733	1816	1157	770	920	1025	794	892	812	585	625	749	230	254	328	232	233	173				Il4ra	1.41169	0.307805	0.000163819	8326	7509	7426	7077	11627	11410	1315	1517	1243	1681	1919	1621	4933	3583	2162	3492	3050	3968	5800	7269	1568
Gm5790	-1.4521	0.292207	1.9289e-05	433	495	471	591	664	583	1016	1076	860	1262	1388	1382	1229	1392	1125	1618	1501	1438				Clcf1	2.99447	0.568495	0.000163823	2247	2062	1043	719	1234	1167	42	44	29	77	141	81	879	707	219	442	241	325	1678	1546	80
Igdcc4	2.73684	0.60643	1.94097e-05	1960	2107	997	341	190	362	927	842	889	199	223	270	131	162	692	225	353	624				Gm5790	-1.22364	0.280077	0.000163823	433	495	471	591	664	583	1016	1076	860	1262	1388	1382	1229	1392	1125	1618	1501	1438	682	622	1341
Msi1	-3.78265	0.558534	1.94402e-05	32	18	5	11	39	21	1437	1394	1769	633	668	781	130	409	804	3	0	3				Glipr1	3.21564	0.602374	0.000164638	2733	2027	2879	2503	5018	4283	137	211	239	101	151	127	538	125	78	137	155	37	1164	1407	73
Slc2a9	-2.72371	0.478108	1.95196e-05	63	40	66	105	94	94	479	563	401	778	791	780	329	263	515	511	541	544				Mmp11	2.34527	0.520852	0.000166969	430	450	299	153	299	276	20	40	27	8	22	13	53	45	39	46	36	37	84	172	21
Ptgs2	4.46607	0.587701	1.96534e-05	2333	1802	1739	1572	4207	3592	3	11	12	26	51	21	2395	430	248	473	271	167				Rtl8b	3.01669	0.623061	0.000166989	94	80	50	42	75	74	19	14	18	1	5	3	0	3	2	3	2	0	41	70	10
Igf2r	1.33555	0.26732	1.96893e-05	11838	11965	18674	11205	12376	12664	4933	5791	5415	4844	5130	5658	6753	5770	6047	5594	5057	6095				Gng7	1.98963	0.493756	0.000167933	308	282	160	127	117	173	101	102	93	29	37	52	54	48	87	32	37	32	87	188	130
Gata5	1.37835	0.266602	1.98172e-05	4700	4901	4245	4699	7003	6920	1546	1775	1999	1548	1697	1698	2778	3205	2341	2	4	0				Nanos1	-2.53429	0.590077	0.000167933	29	20	71	112	115	131	65	50	59	104	96	109	124	178	71	170	127	149	34	32	78
Myo15b	-4.40521	0.612849	1.98172e-05	882	1151	412	383	121	100	14373	14977	13191	22712	25100	22762	14468	10721	17363	18905	15346	14936				Gm5841	-1.31372	0.30075	0.000168276	138	178	204	280	288	213	444	527	508	394	405	449	545	717	451	404	381	417	233	308	520
Rhobtb1	1.58092	0.313368	1.98172e-05	229	284	251	204	277	170	86	105	113	86	62	74	121	88	104	134	111	114				Cyp1b1	4.46914	0.762914	0.000169792	6542	5357	12990	8102	9461	11953	7	8	7	71	129	63	540	329	152	231	340	319	1636	4918	22
Bpnt1	-1.83619	0.354954	1.98267e-05	4164	4402	3460	5389	5528	4897	13941	15790	12458	20816	19264	22761	4469	4912	5811	4923	4804	4605				Pitx1	2.1236	0.449733	0.000172365	1045	1598	664	883	842	2084	668	662	687	440	591	569	636	782	576	0	3	0	2240	3655	631
Tmem63c	4.93619	0.61194	1.9884e-05	164	123	98	234	180	262	2	0	3	7	2	3	5	3	4	6	5	8				Pdgfc	2.44768	0.515046	0.000172464	762	648	939	434	550	574	30	60	24	68	53	59	237	138	96	313	382	557	635	681	100
Atp5g1	-1.02172	0.207532	1.99942e-05	218	212	189	249	279	214	548	547	497	456	415	561	240	295	275	423	394	367				A430078G23Rik	6.02513	0.85131	0.000172952	42	36	15	33	35	33	0	3	0	0	0	0	0	0	0	0	0	0	102	83	0
Mgam2-ps	-4.81433	0.697855	2.01036e-05	24	9	36	335	87	11	2477	2471	2711	3410	3683	3743	4066	4067	2861	6518	4135	5086				Cenpj	-1.10072	0.253435	0.000176589	206	202	237	273	296	236	254	271	283	258	303	301	389	441	330	431	344	324	156	251	264
Snap25	2.52142	0.526805	2.0111e-05	73	67	61	34	49	42	52	69	58	13	13	26	4	16	40	7	3	1				Gad1os	3.89504	0.822584	0.000177109	134	121	137	76	76	92	6	1	13	3	0	1	4	3	9	1	1	4	27	188	0
Cfh	6.27039	0.754695	2.04515e-05	2047	1481	1256	28	40	345	6	18	8	2	2	2	0	0	0	0	1	0				Alppl2	-4.84959	0.815291	0.000177555	0	0	1	0	0	0	161	214	168	181	210	179	5	9	69	15	9	25	0	2	200
Mageh1	3.20065	0.588363	2.04515e-05	196	200	88	57	95	59	43	52	48	8	13	10	10	12	25	8	3	5				Fignl1	-1.50254	0.344647	0.000177766	334	341	558	743	656	566	951	990	968	762	796	973	1024	1169	735	1160	1033	1037	441	651	930
Pip5k1b	-2.00026	0.377579	2.0514e-05	606	719	720	982	980	628	3048	3117	3008	3966	4605	4771	2461	2809	4053	3475	2961	2729				Fam126a	-1.47942	0.340331	0.000179776	502	419	363	655	855	587	460	441	426	552	623	526	751	871	581	619	456	644	335	295	583
Gm11735	-5.3741	0.825044	2.06442e-05	0	0	0	0	0	1	33	30	27	92	60	107	13	58	97	56	77	50				Ccsap	-1.92039	0.417573	0.000181075	22	37	60	69	59	55	140	162	173	106	123	129	116	182	171	177	160	149	35	53	229
Ldhd	2.60411	0.466506	2.07212e-05	7477	7494	3249	2684	2659	3258	825	847	534	676	675	624	898	598	541	819	611	581				Prpf40b	1.69113	0.400113	0.00018182	2111	1790	1194	662	900	1169	943	899	981	427	503	568	573	571	697	618	744	554	1180	1620	939
Thnsl2	-2.4505	0.427316	2.10695e-05	96	85	39	48	49	65	666	729	512	855	786	1006	129	169	359	108	124	149				Arhgef40	1.81161	0.407105	0.000182021	3511	3220	2488	3012	4091	4084	353	358	267	318	389	355	2214	1303	1739	3626	2370	1481	2525	2760	734
Papss2	-2.5077	0.468274	2.13502e-05	2581	2806	2954	2860	2168	2289	6293	9605	7381	15969	12338	16597	1408	1418	877	13728	30497	21993				Asic1	3.41233	0.711645	0.000182156	87	70	44	72	40	121	14	11	24	5	4	6	1	0	3	0	0	0	23	61	9
Cyp1b1	5.6466	0.657348	2.14466e-05	6542	5357	12990	8102	9461	11953	7	8	7	71	129	63	540	329	152	231	340	319				Spata6	3.11801	0.582411	0.000182156	1621	1575	1246	1471	1638	1379	21	56	22	27	82	29	100	45	14	746	650	625	1408	1398	90
Steap4	3.88656	0.701728	2.15669e-05	97	42	138	9	38	51	4	4	14	0	0	0	5	12	13	2105	2614	2171				Cacnb1	2.88683	0.690351	0.000183662	363	305	235	72	121	165	27	34	30	3	5	3	23	9	25	19	29	24	160	245	33
Cela1	2.23786	0.434584	2.17823e-05	993	1404	569	1175	773	632	254	326	241	303	276	297	243	184	399	2369	2057	1030				Gm34583	4.65205	0.682525	0.000184533	147	128	118	169	88	115	2	0	3	0	2	5	0	1	0	0	0	0	84	86	3
Dap	1.63644	0.324298	2.18394e-05	6942	6822	6273	4766	4743	4442	1852	1964	1551	2123	2324	2045	1421	926	1356	4967	4195	3624				Pappa2	-5.18389	0.884919	0.000184749	1	0	0	0	0	0	231	344	647	135	118	189	5	12	85	54	41	10	0	0	307
Dnajc1	1.35386	0.274452	2.19335e-05	1863	1692	1824	1788	1785	1799	939	916	1046	560	623	921	1056	1020	1061	825	748	1129				Card14	-2.36719	0.50744	0.00018499	326	351	175	138	94	81	634	579	622	561	622	644	1304	1028	760	1717	1350	1381	110	114	681
Plk2	1.73596	0.321787	2.19448e-05	4096	3501	4515	5003	6648	6497	341	478	478	600	757	636	4741	2681	1496	3336	2783	2322				Zfp108	1.80342	0.433827	0.00018499	113	152	83	70	77	88	93	104	124	36	45	41	28	27	59	47	61	48	79	86	52
Oas1f	-4.57162	0.736734	2.21212e-05	0	0	1	2	1	1	73	90	50	13	36	27	66	110	84	3	0	2				Gm5809	-1.55918	0.360498	0.000185187	160	169	260	326	307	297	390	343	374	504	434	554	285	373	223	299	268	238	203	256	521
Uaca	-1.06225	0.212865	2.21451e-05	1647	1503	1581	1928	1992	1757	6841	6675	6251	4784	5299	5950	5144	6027	9434	5015	4461	4494				Ldlrad3	1.71265	0.392932	0.000186357	371	273	454	274	612	432	91	68	112	78	74	65	126	149	167	1991	1845	1375	729	553	228
Fam124a	3.23264	0.588935	2.22942e-05	37	36	28	8	16	26	1	3	6	3	3	4	8	5	10	224	245	186				Msi2	1.09377	0.254289	0.000186432	4132	3830	3677	2757	2418	2355	2969	3215	3264	2304	2236	2596	2487	2524	2837	5402	5000	3796	4567	4073	3254
Igfbp3	4.72256	0.637653	2.25544e-05	490	284	1342	135	865	602	6	19	6	15	12	18	34	13	22	68	25	19				Obscn	-3.33699	0.667473	0.000187114	0	2	3	0	1	2	54	88	70	25	37	59	21	24	47	5	10	6	1	6	60
Prap1	-6.54508	0.711178	2.26276e-05	22	207	7	87	30	5	19325	24740	20465	27837	22260	25662	1326	713	3566	142	389	483				Ift122	2.06736	0.467864	0.000188429	1322	1402	888	519	750	840	334	405	319	144	138	164	257	229	229	203	217	214	823	1038	201
Fgd2	2.19151	0.443314	2.26326e-05	161	134	126	54	116	170	78	92	94	40	45	72	36	27	87	19	32	28				Zfp809	1.12238	0.254831	0.000189826	2330	1998	1749	1657	1315	2091	1153	1184	1232	986	998	1031	869	949	634	1607	1464	1442	1913	1597	741
Pinlyp	5.06561	0.659705	2.29094e-05	169	165	40	71	101	56	4	0	0	3	3	6	3	0	5	2	2	4				Lynx1	2.84838	0.591654	0.000190005	1628	1560	1081	850	660	798	58	91	40	147	209	135	437	204	319	356	344	433	1355	1379	155
Zfp36l1	1.543	0.310226	2.292e-05	13941	12769	12332	7411	9206	10850	6074	5736	5634	3310	3603	3827	5245	4438	4567	4195	3237	3146				Chaf1b	-1.32784	0.30591	0.00019128	611	632	822	945	1145	980	1271	1233	1294	922	1063	1231	1687	2329	1274	1469	1321	1250	547	919	1436
Cyp4f40	-4.80846	0.649927	2.29812e-05	43	53	32	10	9	4	636	575	413	1719	1937	1966	819	861	1083	540	507	459				Mmp28	3.1311	0.661505	0.000192576	666	724	432	280	329	356	112	121	124	380	358	363	190	133	244	605	606	718	1252	747	205
Rbks	-2.03372	0.388223	2.3291e-05	79	100	42	91	82	86	332	282	306	383	412	424	119	217	179	241	181	203				Ugt2b5	-6.3962	0.977667	0.000193029	0	0	0	0	0	0	208	238	170	793	834	841	1	2	15	1	12	26	0	2	873
Wnt9b	-4.86741	0.819588	2.35361e-05	0	0	0	0	0	1	29	30	18	22	15	24	7	4	9	0	1	1				Mrm1	1.00522	0.238212	0.000193065	476	509	429	314	300	324	595	701	602	382	408	429	324	374	521	417	461	390	407	646	591
Ckb	-4.19336	0.659086	2.36631e-05	89	61	119	541	767	393	2792	2718	2203	9856	9074	9752	778	1204	961	876	844	860				Erich2os	3.14227	0.674498	0.000194193	109	89	150	92	69	82	12	14	12	5	9	6	6	10	10	7	6	27	31	212	10
Olfml2b	6.02544	0.701822	2.37356e-05	389	233	165	202	760	324	3	4	0	0	1	3	2	22	3	0	1	1				Gsap	2.79206	0.566835	0.000194213	2567	2159	2248	1205	1154	1691	37	61	62	94	164	92	789	558	388	1483	1301	1651	791	2454	82
Sil1	1.19931	0.245554	2.37749e-05	2697	2542	3396	2775	2258	2608	1660	1575	1237	1129	1272	1328	1461	1150	1418	1802	1737	1588				Bnip2	1.02523	0.232429	0.000194863	1927	1802	1857	1508	2131	2046	753	660	669	511	594	571	1074	948	571	954	756	682	1287	1901	676
Cyp2b13	-5.06307	0.685213	2.3838e-05	1	1	0	3	1	0	22	26	13	48	58	47	1	1	1	1	2	0				Pdlim4	3.16263	0.75851	0.000194863	864	853	803	476	543	505	33	79	54	6	4	9	17	18	14	63	34	12	78	373	32
CT486005.1	4.89792	0.694695	2.40616e-05	415	614	69	89	55	54	6	2	5	7	5	1	48	33	29	170	124	132				Selenon	2.53797	0.557627	0.000194863	2134	1908	1769	598	1157	1107	220	339	219	75	113	153	240	147	109	274	252	140	1210	1870	275
Oaz2	1.38662	0.286265	2.44797e-05	572	542	568	458	661	617	357	475	424	236	236	245	303	329	403	376	393	362				Dhfr	-1.60967	0.365591	0.000195369	412	530	585	804	766	696	1962	1958	2168	1232	1296	1558	1232	1960	1207	1325	1231	1215	490	854	1668
Gm10791	-4.64973	0.812592	2.47675e-05	0	0	0	1	1	0	19	18	26	19	7	21	12	23	6	4	4	14				Elmo3	1.05586	0.245037	0.000195369	4221	4163	3818	3007	2696	2858	3214	3275	2699	2805	3240	3046	3106	2468	3482	4138	3634	3371	4720	5189	3821
Ctsh	1.60417	0.313839	2.47968e-05	12337	11769	11627	16849	22115	17442	4463	4975	4536	2928	3403	3422	5907	5230	4307	5608	4723	4001				Gm7676	3.60478	0.743435	0.000195934	82	57	232	50	84	80	26	40	58	21	14	43	56	63	100	6	2	6	90	26	2
Il4ra	1.52032	0.292939	2.51726e-05	8326	7509	7426	7077	11627	11410	1315	1517	1243	1681	1919	1621	4933	3583	2162	3492	3050	3968				2010106E10Rik	-6.21026	0.987681	0.000197491	0	0	0	0	0	0	1115	1570	1643	5826	4111	4241	7	72	633	7	10	0	0	1	1673
Fth1	-1.83283	0.353227	2.56333e-05	15983	17083	14048	15350	13515	12980	49225	54887	53817	83211	77879	85316	13544	12235	19065	19592	17987	17610				Neurod1	-5.17524	0.80946	0.000201368	0	1	1	0	0	1	242	214	264	82	70	74	22	59	131	8	7	3	1	0	267
Pla2r1	5.67221	0.723444	2.57255e-05	195	236	202	52	56	317	8	1	0	0	0	3	7	6	5	0	2	0				Myo1c	1.02361	0.230246	0.000202072	14351	14632	14685	15666	19134	16671	3996	4421	3731	5333	6187	5751	17795	15369	9559	14967	11893	11949	16905	17698	5379
Arhgef19	1.07666	0.224234	2.5796e-05	1630	1494	1373	1117	1626	1788	1126	1271	985	783	787	934	526	682	708	714	670	616				Gm4779	-1.49362	0.719486	0.000203921	0	36	0	0	0	0	0	0	0	0	0	0	0	0	0	0	0	0	0	0	0
Gm10039	-1.27828	0.260118	2.58232e-05	623	690	607	754	885	660	1541	1583	1473	1849	1696	1960	830	1070	963	1469	1479	1387				1700088E04Rik	1.82197	0.403633	0.000204017	220	189	161	124	130	124	42	32	24	44	41	40	55	31	44	81	62	66	127	161	39
Fzd10	4.82541	0.844808	2.59196e-05	17	18	9	15	51	27	0	0	0	0	0	0	47	25	36	55	141	299				2610301B20Rik	1.02469	0.236851	0.000204113	399	369	277	292	310	357	233	248	211	153	148	175	268	246	233	292	232	238	340	470	243
Tcp11l2	2.57777	0.487053	2.59261e-05	1184	1195	873	741	532	871	300	345	328	126	129	114	346	181	346	312	207	160				Ankrd13d	2.16906	0.467419	0.000204983	257	240	232	150	169	200	30	25	18	2	25	15	45	38	27	59	38	39	207	215	34
Diras2	4.36916	0.637661	2.61338e-05	146	84	344	192	99	99	15	11	17	0	4	11	4	1	7	2	3	6				Smoc2	-3.57863	0.69626	0.000204984	195	143	810	1656	991	934	15790	16948	17632	7371	7574	9693	2497	4973	7070	886	900	723	275	747	12002
AC133889.1	2.53933	0.456333	2.6238e-05	69	91	76	62	67	66	12	9	7	14	9	5	27	19	15	22	20	11				Phyhd1	2.9257	0.686148	0.000205048	152	150	60	47	56	54	30	24	12	3	3	7	3	1	3	5	4	1	33	102	21
Tcf7l1	3.84584	0.643586	2.64294e-05	264	284	105	56	86	100	22	18	18	1	6	6	4	9	8	425	277	66				Nme5	3.32485	0.768529	0.00020518	70	72	23	46	22	48	13	19	6	7	1	0	8	11	17	11	10	2	23	67	6
Cbr2	4.29797	0.669397	2.65535e-05	312	419	351	157	33	47	7	5	2	13	16	9	53	20	80	10279	14339	10130				Gm48768	2.0672	0.511135	0.000205243	99	183	103	76	49	44	135	155	175	47	68	57	82	82	215	150	164	169	109	278	132
Depdc7	-1.52709	0.307301	2.66081e-05	294	286	211	420	403	376	1002	1201	895	989	953	966	769	699	829	199	165	163				Ppp1r36	5.29905	0.883804	0.000206004	116	92	59	70	78	97	0	1	0	1	0	0	1	1	0	0	0	0	16	58	0
Zfp420	1.91923	0.398343	2.6656e-05	339	351	273	152	172	191	187	183	207	99	84	89	92	90	152	170	138	123				Sdr39u1	-1.05754	0.244351	0.000206004	627	578	542	796	730	775	1127	1153	905	1058	1170	1261	1141	1226	1052	1351	1162	1035	503	753	1302
Cxcr4	4.89043	0.613487	2.66595e-05	281	256	405	309	327	376	9	6	24	2	3	4	1	8	1	0	2	1				Gm5881	-1.05419	0.240849	0.000206924	545	565	590	564	696	594	976	1012	960	1105	1253	1200	727	739	982	1545	1423	1286	489	541	1211
Kazald1	2.34764	0.470664	2.66595e-05	66	102	82	45	42	61	39	28	37	15	36	29	18	11	49	62	44	32				Irgm2	1.81997	0.415217	0.000207379	243	278	158	120	177	232	93	115	133	108	84	78	160	86	202	234	283	203	246	243	78
Psph	-1.49274	0.318234	2.66967e-05	404	383	439	672	556	445	413	460	476	679	661	759	1559	1637	633	555	569	456				Gpc1	2.17488	0.442896	0.00020825	1872	1578	1985	1960	3366	2958	26	40	24	48	65	49	100	76	33	650	436	209	986	1061	88
Klhl24	1.53053	0.320014	2.67864e-05	3485	3503	3515	2196	2168	2619	2171	2363	2829	1226	1245	1426	1739	1872	2535	2111	1798	1646				Mterf2	-1.28745	0.289875	0.000208327	94	71	58	89	93	93	382	488	399	437	411	482	158	161	262	244	241	226	88	131	412
Fnbp1	1.88416	0.379744	2.70597e-05	1202	1183	1122	1104	1117	1222	607	713	690	260	294	326	477	443	600	683	522	382				Spats2l	2.1822	0.485171	0.000208635	606	671	843	1211	944	724	106	131	222	92	93	67	439	319	417	247	124	149	484	1048	175
Hdac5	1.16227	0.248549	2.71479e-05	2985	2989	2786	1743	1696	1808	2880	2901	2671	1846	2151	2299	1007	978	2171	2151	1779	1635				Smim6	2.11431	0.48557	0.000210506	1086	1470	386	625	623	342	664	878	931	472	605	603	530	648	891	884	804	669	2541	1514	744
Manba	1.36065	0.274615	2.71953e-05	3937	3601	3224	2724	3366	3001	949	1094	1102	1284	1429	1255	1545	1114	1262	1794	1789	1681				Slc7a8	-4.23946	0.746634	0.00021105	2	5	40	12	4	8	1102	935	862	1825	1581	2029	2	5	10	40	110	85	15	17	1247
Cpm	2.61572	0.512514	2.72259e-05	1683	1429	1518	505	541	812	447	587	593	228	223	237	130	114	251	242	153	82				Dnaaf3	2.82274	0.591348	0.000211091	305	350	305	259	205	183	23	45	24	18	18	21	75	13	28	121	90	114	132	283	16
Spdl1	-1.82647	0.381832	2.73583e-05	311	306	481	648	654	545	551	579	569	819	969	1123	979	1072	479	1253	1028	1068				Chaf1a	-1.5017	0.34935	0.000211106	837	922	1234	1660	1768	1656	2424	2394	2306	1678	1902	2210	2729	3811	1909	2487	2193	2172	1017	1672	2649
Golgb1	1.03474	0.214437	2.77147e-05	7080	6493	7502	6919	6669	6612	3282	3617	3500	3323	3868	3946	6067	4477	6124	6814	5249	5300				Nlrp1b	-3.62709	0.691371	0.000211106	1	5	4	2	0	0	377	414	386	525	392	500	20	30	219	217	284	239	3	1	261
Rhoq	2.03418	0.419857	2.83354e-05	1730	1703	2010	1358	1830	1830	1298	1296	1392	438	480	562	871	721	1527	1289	1554	1405				Prrx1	-5.44583	0.976966	0.000211106	0	0	0	0	0	0	68	107	55	434	337	389	1	2	8	1	0	0	0	0	67
Gip	-7.10207	0.760726	2.84024e-05	0	1	0	3	0	0	3343	3235	5062	1030	466	598	2	25	188	0	5	3				Fgl1	2.90001	0.71667	0.000211167	63	63	234	54	48	76	120	164	116	55	54	44	10	50	86	64	128	98	38	499	75
Peli3	2.89347	0.579965	2.84024e-05	70	80	59	19	17	24	18	30	16	11	10	7	10	13	33	23	19	47				Cox20	-1.00982	0.234934	0.000212018	209	233	224	220	180	194	496	425	444	404	408	470	433	528	378	351	349	352	208	266	335
Sned1	3.25052	0.57855	2.85042e-05	522	518	378	131	205	212	76	77	59	12	23	25	90	55	75	149	148	99				Il22ra1	-1.46544	0.339015	0.000212018	372	409	293	205	202	313	1036	1000	1108	1136	1334	1370	1518	1561	1127	1098	804	824	726	547	1371
Shisa4	6.22852	0.66458	2.85361e-05	342	266	305	258	629	649	2	1	2	0	0	2	12	4	2	11	1	5				Nsmf	1.32672	0.313088	0.000213032	3117	2749	2149	1490	2227	2241	1561	1684	1633	820	814	943	1289	1322	1394	2094	1757	1861	1922	2417	1450
Nfatc4	4.97539	0.645709	2.8773e-05	655	347	370	99	155	391	5	4	3	1	12	9	16	16	7	6	2	9				Mvb12b	2.28021	0.615717	0.000214753	655	549	393	183	430	456	46	80	56	11	11	13	19	40	67	2	3	10	157	111	69
Galc	2.15473	0.418942	2.88273e-05	2426	1769	2739	1023	1437	2304	571	680	626	429	464	498	419	435	411	329	512	649				Acat3	-1.56745	0.358821	0.000214934	745	858	1043	1067	1022	970	972	1223	743	1448	1386	1581	1042	1235	929	1225	1165	989	469	808	1457
Aifm2	1.04559	0.219334	2.94461e-05	704	681	604	477	478	485	341	397	424	329	343	380	435	352	477	528	471	438				Zfp719	1.06629	0.244312	0.000214934	608	542	414	384	531	528	395	423	421	299	343	353	366	390	323	382	415	315	447	511	176
Gm2379	6.05713	0.732886	2.94756e-05	70	96	47	20	21	30	0	0	1	2	0	0	0	0	0	0	0	0				Shank2	2.07172	0.498102	0.00021594	2278	2188	2396	1549	2046	1877	966	1035	972	216	259	334	119	140	273	122	128	86	1323	2485	830
A730020M07Rik	2.587	0.474151	2.96553e-05	89	89	51	90	106	76	9	13	9	19	16	8	46	27	42	20	15	24				Gm12870	-1.32185	0.306553	0.000216338	198	239	241	360	343	322	482	500	545	378	434	449	434	620	359	540	470	426	218	370	560
Exosc8	-1.02383	0.2162	2.97371e-05	775	817	897	988	915	749	1349	1366	1311	1086	1126	1296	1638	2198	1095	1170	1030	1092				Slc16a2	2.8449	0.638505	0.000218514	843	796	895	543	822	911	52	41	54	9	10	7	9	21	7	1	0	1	348	420	66
Ppp4r1	-1.26456	0.262874	2.98548e-05	1586	1755	1226	1689	1998	1477	2444	2463	2523	3258	3397	3355	3679	3703	2841	3847	3245	3191				Dbf4	-1.43515	0.341758	0.000219145	1014	1099	1779	2321	2106	1804	1850	1808	1615	1866	2070	2411	3377	4129	1760	2486	2270	2179	1474	2360	2742
Zfp704	1.78553	0.400214	3.02976e-05	2880	2734	2239	1373	1080	1490	2541	2882	3466	1198	1143	1567	939	1474	3275	845	1100	1540				Dscaml1	3.38105	0.622578	0.00021989	1578	1302	743	511	941	784	22	21	17	46	79	37	300	138	54	47	26	30	1388	705	49
Cobl	-1.96612	0.388235	3.03725e-05	1124	1065	2112	1907	1791	1438	3897	3937	4084	5912	5798	6222	5299	4609	4577	7720	6633	7031				Tnni3	3.27066	0.675031	0.000219964	220	229	151	107	86	54	16	19	15	17	10	12	46	5	29	46	30	41	89	218	8
Nup62cl	5.01257	0.610433	3.0898e-05	184	118	114	60	131	78	0	2	4	2	3	7	2	1	2	0	1	1				Btnl1	-5.68803	0.933094	0.000220975	0	0	1	0	0	0	1633	1747	1720	4319	3850	4338	15	59	497	11	156	275	0	5	1912
Chchd7	-1.08776	0.224051	3.0961e-05	385	316	358	320	295	269	741	787	782	824	853	900	376	443	457	375	355	357				Tgfb3	5.65977	0.778764	0.000221977	1865	1416	3625	4312	5724	5118	1	2	0	0	0	0	3	1	0	7	15	0	361	920	3
Ier5l	2.52859	0.45429	3.14987e-05	546	415	728	511	1215	1140	59	100	87	90	105	116	145	137	130	147	139	118				Cnep1r1	-1.03134	0.244059	0.000222895	860	922	805	1393	1225	1175	1969	2047	2087	1567	1660	1668	2022	2113	1212	1578	1187	1163	1213	1172	1546
Spink1	-7.58364	0.867285	3.15965e-05	0	0	0	0	0	0	62	141	206	877	658	563	2	6	63	16	16	17				Nasp-ps1	-1.57099	0.361177	0.000225035	76	83	135	132	140	131	172	206	256	145	156	186	228	361	192	243	213	174	86	127	273
Gm49011	3.64497	0.593148	3.18773e-05	47	45	21	11	12	13	1	6	8	3	0	4	0	0	1	3	2	2				Cdca8	-1.66409	0.387422	0.00022664	782	989	1603	2054	1841	1468	2256	2417	2136	2021	2079	2448	3186	3937	2054	2682	2279	2305	874	1791	3075
Bmyc	1.34483	0.281597	3.18827e-05	675	658	615	525	619	608	506	537	428	252	257	314	260	268	323	191	224	216				Plcxd2	-1.52729	0.364276	0.000227035	213	220	312	408	356	293	538	522	680	973	980	912	924	723	526	869	738	655	331	393	449
Chgb	-5.81401	0.638607	3.20769e-05	69	79	2	25	9	6	15659	18812	26698	6454	5614	7647	740	1974	8137	1084	1372	685				Dlk2	3.35003	0.70033	0.000229446	10	11	4	6	5	2	9	11	3	9	4	8	6	3	15	0	0	0	45	28	7
Hcfc1r1	1.58229	0.317893	3.24478e-05	3565	3392	3146	2617	2842	3440	945	1020	826	1094	1124	1198	1248	700	1049	1913	1987	1366				Pttg1ip	1.12398	0.260661	0.000229446	11303	10725	7838	6476	8327	8531	5035	5363	4915	4812	5076	5079	4437	3344	4082	4689	3911	3307	10023	7496	5123
Mfap3l	3.78643	0.597784	3.30599e-05	93	76	149	229	445	338	6	10	5	2	13	6	1112	632	666	1616	1045	1293				Fsd1	-4.04101	0.947905	0.000229693	0	0	0	0	3	0	8	8	5	13	17	11	2	0	0	0	2	1	0	0	5
Pcdh8	-5.2377	0.787813	3.3326e-05	0	0	0	0	1	1	81	106	183	75	73	96	2	5	22	0	0	1				Cd83	-5.18694	0.811664	0.000229835	0	0	1	0	0	2	364	372	391	104	95	118	19	40	122	9	16	8	0	1	260
Arhgap11a	-1.12225	0.239454	3.35093e-05	1516	1700	2197	2458	2211	2067	2837	2899	2908	2313	2438	2880	3646	4461	2100	3083	2610	2582				Fam171a2	1.59454	0.379711	0.000229835	546	601	646	317	699	715	94	94	62	55	69	64	102	128	162	60	67	39	257	422	170
Mfsd4a	1.9905	0.408717	3.36724e-05	4813	5246	4642	2645	1957	2926	1565	1773	2226	1409	1334	1249	1445	1282	2225	12888	7989	5581				Cpm	2.05996	0.512056	0.000230998	1683	1429	1518	505	541	812	447	587	593	228	223	237	130	114	251	242	153	82	715	1168	656
Obsl1	5.44325	0.611459	3.37559e-05	505	434	594	302	579	505	10	7	17	2	4	1	2	5	0	0	1	6				Erich2	3.27692	0.692626	0.000231103	233	224	210	147	108	131	20	18	6	15	7	10	18	15	31	9	10	20	77	471	5
Nrg1	5.37309	0.587347	3.38553e-05	190	188	328	251	325	284	3	8	10	8	5	0	0	0	2	0	0	0				Mylip	3.02064	0.748645	0.000232078	266	233	105	107	178	179	86	71	79	13	4	8	69	79	129	57	106	109	235	71	21
Cdc42ep1	1.62595	0.321621	3.39291e-05	4976	4849	5108	4862	6561	5743	1676	1810	1757	844	989	1127	2603	2825	1606	1921	1628	1437				Hbegf	1.28937	0.297661	0.000232625	3185	2800	3035	2828	3672	3838	542	653	542	447	571	508	1347	1176	910	1699	1239	1067	3151	2891	1522
Ppp1r1b	-1.25028	0.252795	3.41932e-05	3642	4172	4212	4273	3072	3266	14055	14965	15923	9476	11511	13339	10026	14310	15207	18529	14534	11064				Slc16a6	-1.85517	0.446772	0.000232868	402	386	702	1125	1120	911	1400	1460	1612	2263	2357	2653	2033	1789	1063	633	472	464	624	790	1775
Cidea	4.17259	0.592188	3.42266e-05	216	216	117	237	246	109	0	5	13	11	7	7	10	2	7	17	15	11				Gm28523	-4.60557	0.874616	0.000235117	0	0	0	0	0	0	119	88	110	33	37	48	9	11	28	52	55	23	0	0	105
Mdga1	5.03999	0.646655	3.4459e-05	472	387	352	118	200	365	6	1	17	4	1	5	15	4	4	5	2	4				Blm	-1.74128	0.40626	0.000235342	326	353	561	790	702	613	886	877	943	743	846	946	1190	1514	775	963	789	895	275	698	1023
Mis18a	-1.17121	0.248354	3.4459e-05	299	306	419	457	499	461	636	649	607	530	611	661	761	954	536	698	583	594				8030474K03Rik	-1.49987	0.718758	0.000236112	0	13	0	0	0	1	0	0	0	0	0	0	0	0	0	0	0	0	0	0	0
Celf2	2.68523	0.443953	3.47764e-05	1256	1173	1167	1838	2051	1885	50	60	64	47	123	96	243	97	51	70	81	134				Nccrp1	6.96729	0.97381	0.000238142	23	25	4	9	5	13	1	1	0	3	0	0	2	3	0	1	0	0	385	101	0
Ano1	1.58026	0.305699	3.48414e-05	11349	11268	10859	11160	14924	13645	1567	1791	1172	1944	2745	2274	13258	13271	6587	8685	5346	4868				Pnpla1	-4.59385	0.865515	0.000238142	0	0	0	0	0	0	174	132	132	75	86	98	9	10	72	23	19	40	0	0	185
Dis3	-1.02486	0.218203	3.49309e-05	1223	1222	1208	1463	1523	1385	2138	2099	2302	1494	1708	1910	2480	3210	1615	1932	1631	1688				Nalcn	4.06001	0.896722	0.000238425	223	252	310	110	90	256	3	7	6	0	0	0	0	0	0	0	0	0	5	78	0
AC125351.1	1.59563	0.317574	3.49823e-05	463	429	287	264	429	444	90	105	129	98	104	117	163	112	109	164	140	115				Klhl3	3.0559	0.813052	0.000238613	510	391	438	259	94	170	171	190	89	10	24	3	36	19	174	28	17	6	45	136	28
Fam131c	2.85327	0.507843	3.49823e-05	217	191	113	109	153	136	21	31	29	5	20	21	48	22	33	25	20	9				Akp3	-6.58548	0.986312	0.000238767	0	7	5	0	0	0	30560	35453	28299	5152	2673	5820	2	38	64	1	31	21	8	4	4352
Znrf1	1.72113	0.34538	3.57142e-05	2651	2687	2001	1697	2390	2306	916	981	912	438	494	536	887	911	648	1421	1091	1034				Gm11723	2.72457	0.590809	0.000238767	59	72	38	33	30	37	11	16	32	13	21	26	25	21	20	49	25	30	69	42	13
Pof1b	1.19496	0.255647	3.58267e-05	2803	3044	2047	1655	1859	1872	1717	1720	1714	1640	1876	1632	1165	1296	2165	3474	3016	2467				Mras	2.60532	0.513344	0.000238818	394	414	413	559	485	388	48	86	84	34	56	46	834	557	114	1248	904	677	232	697	18
Pde9a	-1.67562	0.316258	3.58987e-05	213	140	170	118	190	189	2100	1914	1582	1122	1129	1167	511	567	1534	5240	3783	3378				Neurod2	-4.85523	0.937401	0.000238818	0	0	0	0	0	0	37	35	34	17	12	27	4	14	6	0	0	0	0	0	32
Sytl2	1.97414	0.403884	3.64133e-05	2576	2829	930	1139	1574	1211	706	801	973	577	707	568	1491	1301	2178	1553	1251	1392				Hdhd3	-1.78465	0.393707	0.000239191	151	161	110	101	123	134	880	915	812	1092	1255	1158	216	313	532	555	567	431	238	166	980
Erfe	-1.8989	0.389918	3.70227e-05	198	222	406	528	489	407	942	816	894	834	966	1080	1264	1646	976	937	690	599				Gp1bb	-4.3757	0.905998	0.000241184	0	1	0	0	0	0	19	17	14	19	31	45	19	36	37	4	4	6	0	0	25
Gm4714	-4.67416	0.823674	3.72719e-05	0	0	0	0	0	0	12	18	18	12	12	10	4	7	6	10	7	4				Tnfrsf8	-4.07819	0.846461	0.000241364	0	0	1	16	3	8	62	95	71	129	106	169	38	74	85	453	375	152	12	0	291
Amn	-5.0326	0.670919	3.7819e-05	0	4	7	24	17	12	829	997	839	921	1089	1124	131	253	516	9	97	77				Sesn1	-1.18608	0.26594	0.000241504	476	422	352	411	332	373	1592	1697	1584	1746	1677	1871	438	627	1181	439	450	433	310	479	2078
Cenpu	-1.58247	0.331164	3.80758e-05	111	142	177	215	231	188	391	393	394	265	328	407	418	665	309	473	413	363				Srd5a1	-1.54356	0.35228	0.000241504	506	659	884	1239	1144	898	2168	2359	1959	1940	2056	1985	1404	1326	1547	1937	1753	1502	648	742	1983
Mttp	-4.2682	0.581081	3.81765e-05	858	760	441	294	381	551	23512	25887	22845	66716	66418	65836	279	657	3880	208	214	171				Phlpp2	-2.13811	0.491636	0.00024345	298	312	327	334	374	351	650	820	852	2008	1863	1838	617	746	579	1566	1053	971	215	457	1107
Sdc3	3.49141	0.557361	3.81765e-05	329	256	489	249	633	668	26	57	30	12	19	12	42	37	22	25	33	20				Tacstd2	3.83323	0.653128	0.000244121	1572	1537	1939	2286	2907	2632	0	4	6	18	57	37	1406	770	163	729	728	478	1975	2107	12
Strada	1.01317	0.213294	3.81987e-05	701	637	539	465	600	640	380	371	317	249	265	296	313	365	287	524	412	398				Dll1	-2.53071	0.520263	0.000246128	629	457	373	108	232	190	2035	2114	2302	1279	1425	1720	404	774	765	58	85	45	191	128	1715
Cavin1	2.11755	0.381764	3.82946e-05	5703	6381	6753	7412	9168	8053	350	458	260	641	903	697	4771	4173	1546	3904	3354	2949				Fetub	3.80369	0.696667	0.000246485	951	991	927	405	310	575	25	20	16	27	32	23	228	160	43	18	109	157	859	1191	9
Rrm2b	1.06759	0.222124	3.83706e-05	486	403	356	393	418	420	163	155	227	158	155	176	252	207	181	296	254	228				Spc24	-1.9594	0.450908	0.000247254	164	278	420	457	408	361	776	838	724	540	578	648	628	947	428	637	529	565	162	462	973
Galnt14	6.3309	0.822546	3.83707e-05	53	21	77	33	132	95	0	0	0	0	0	0	9	2	4	1	2	0				Cdca3	-1.84601	0.431522	0.000247867	780	1113	1761	2327	2029	1681	2979	3096	2447	2826	3246	3729	3215	4812	2443	3365	2928	3073	962	2216	3705
Stk36	2.73189	0.510793	3.85481e-05	265	206	158	81	149	209	51	47	55	15	18	26	45	35	42	47	37	23				Runx2	3.76873	0.666704	0.000249276	984	903	1373	552	1243	1580	0	1	2	15	17	8	501	251	62	33	30	35	640	519	7
Nhsl1	-2.0156	0.401296	3.88382e-05	1136	1234	1158	1332	1692	1440	2808	2956	2663	5063	5725	5771	5428	5646	5092	8702	7287	7075				Sult1a1	2.01459	0.782869	0.000249973	49	42	26	4	14	10	27	32	36	10	0	3	0	4	11	185	531	297	7	10	12
Gm35019	5.05456	0.662765	3.91027e-05	116	90	302	309	113	100	2	2	2	1	3	5	9	5	5	5	16	22				Pla2g4c	3.34771	0.713244	0.000250166	653	739	738	425	488	676	40	47	54	21	14	28	26	76	12	29	82	306	1239	859	87
Man2a2	1.28938	0.266194	3.9199e-05	2991	2470	2298	1934	2550	2599	1106	1129	1248	688	809	983	1989	1721	1424	610	647	756				Dnah8	-4.22179	0.709703	0.000250229	6	3	7	9	4	6	523	373	321	255	325	274	357	483	383	366	318	242	1	0	26
Stk32b	3.16981	0.679348	3.92024e-05	255	226	68	11	40	11	78	95	30	9	10	7	2	0	21	0	1	2				Selenoi	-1.27195	0.299308	0.000250229	2757	2785	2630	3485	3110	2682	4396	5039	4465	6977	7190	7100	5300	4622	4154	4646	4483	4139	3764	3198	6757
Gm7823	1.67507	0.347405	3.93694e-05	256	266	308	224	186	267	140	174	174	121	87	143	33	74	70	8	10	10				Cdk20	1.07491	0.248786	0.000250695	342	311	228	234	258	243	138	130	133	119	122	115	197	158	129	303	245	224	243	357	138
Defa35	-5.38579	0.836023	3.94261e-05	0	0	0	0	0	0	56	82	121	135	90	126	14	26	284	0	1	1				Oxct1	-2.36188	0.532877	0.000252107	1672	1968	4173	5654	4911	4262	6541	7837	5873	13122	12658	13066	10906	14289	13547	12514	9170	7142	2023	2979	10253
Rnf181	1.25545	0.256265	3.94618e-05	8955	9187	8150	8821	9625	9639	2227	2376	2223	3105	3350	3283	3049	2841	2275	3586	3245	2814				4932438H23Rik	-1.95716	0.443269	0.000253449	13	25	16	16	18	24	76	82	77	40	64	75	52	48	73	71	72	81	10	8	51
Paqr6	4.27272	0.620545	3.98015e-05	111	110	105	83	86	109	4	10	11	1	0	0	5	6	3	8	2	3				Gm12663	-1.05929	0.253043	0.000254065	236	246	257	278	371	321	266	267	248	329	273	332	405	462	244	556	505	411	244	267	295
Rmnd5a	-1.05378	0.220789	4.01066e-05	3412	3779	3785	3830	3780	3688	6885	8098	7933	9044	8723	8601	6834	6397	7363	7597	7240	7440				Slc25a35	1.1713	0.283595	0.000254626	1276	1445	1324	818	669	852	508	505	492	405	392	452	402	636	703	958	1003	917	541	649	495
Aldh6a1	1.60356	0.348737	4.02547e-05	2657	2571	1887	1328	967	1313	1829	2100	1873	1120	1070	1121	590	573	1210	1085	1114	997				Lct	-5.29306	0.974811	0.000256431	2	6	2	0	2	4	134	230	358	10538	7035	7621	5	6	12	3	1	1	7	14	3132
Tbc1d30	1.06683	0.226338	4.02852e-05	624	697	770	753	619	693	403	418	388	381	419	475	374	378	505	715	558	522				Avpi1	1.06643	0.246275	0.000258241	2519	2544	2822	2839	3080	2649	790	995	808	1091	1000	1015	1227	1215	959	963	805	667	2766	2388	1127
Slc26a2	1.6208	0.329669	4.03592e-05	13090	16041	7206	10190	14863	17743	4718	4368	3873	4097	4304	3798	5401	5229	5181	20917	18821	17498				Scarb1	-1.67444	0.397159	0.000258241	2290	2317	3180	2909	3266	3080	5239	5346	4334	8187	4496	7972	1198	1003	598	2957	2581	2299	2258	3109	8041
Zrsr1	1.43159	0.295185	4.038e-05	477	450	486	345	292	316	132	156	145	163	158	154	258	249	227	298	294	259				Cyp3a16	-4.35819	0.933216	0.000258268	0	0	0	1	1	1	16	16	26	28	35	23	0	0	1	0	1	0	0	0	2
Mpp4	-3.62918	0.541804	4.07157e-05	2	6	4	8	3	6	761	834	381	345	213	329	12	18	138	4	2	1				Slc5a4b	-5.34815	1.019	0.000261416	0	0	2	6	0	0	47	69	72	1043	1067	914	11	9	20	1	2	0	0	1	366
Slc26a9	9.12828	0.674932	4.07292e-05	4552	4105	3764	5290	6424	4009	0	1	2	3	2	0	9	0	0	1	19	4				Mvk	-1.32027	0.31286	0.000262476	950	1095	1015	1280	1444	1237	1675	1711	1120	2142	2250	2344	1496	1790	1248	2224	1871	1622	1067	1026	1622
Gfra4	3.28545	0.563623	4.10808e-05	77	75	220	108	150	222	13	28	12	9	9	17	34	20	37	13	13	16				Hpf1	-1.09737	0.257637	0.000264902	565	599	660	860	840	853	1236	1278	1277	945	927	1122	1321	1573	1101	1212	1101	959	530	808	1278
Glb1	1.09723	0.238505	4.13112e-05	5146	5531	4922	4475	3357	5084	4955	5234	4881	3939	4403	4807	2457	2083	5119	4989	4613	5163				Tmem82	-2.70059	0.570762	0.000265064	93	121	23	50	45	13	918	926	969	854	1010	1194	478	517	559	493	315	365	58	77	1034
Tusc3	1.0397	0.218267	4.13319e-05	2037	1906	2100	2181	2767	2568	980	1269	1213	871	927	907	1949	1809	1681	1590	1352	1386				Trp63	7.39643	0.952581	0.000265145	1	4	0	0	1	0	4	5	3	2	0	1	2	8	0	0	1	0	1443	341	0
Aph1b	1.74689	0.354223	4.15007e-05	423	360	429	297	312	400	100	137	109	128	134	160	156	83	164	304	288	225				Parva	1.20754	0.282163	0.000265206	6334	6912	6941	6348	7083	6674	3933	4217	4588	2032	2497	2557	4623	4649	3701	5382	4548	4151	7640	9562	4126
Ada	-3.03835	0.560315	4.16692e-05	81	167	112	248	401	208	623	810	515	1801	1747	1152	662	536	482	813	536	405				Adh4	-6.97898	0.963606	0.000266582	0	0	0	0	0	0	1117	1149	786	1257	1109	1321	1	4	119	0	0	0	0	1	1038
Olfr1372-ps1	4.26578	0.584735	4.16896e-05	1627	1145	1009	554	1238	1104	6	16	6	21	39	9	199	48	27	47	26	23				Ak2	-1.54508	0.359101	0.000266582	3183	3088	3902	4601	4434	3941	7912	8046	7332	11984	12667	13254	6381	8311	7642	9916	8375	8284	3431	3999	10306
Pon3	1.30001	0.281472	4.16939e-05	1206	1084	867	730	771	775	869	973	914	514	569	652	926	709	1466	1067	1159	1417				Gm5648	-1.73721	0.405102	0.000268046	227	315	423	555	615	487	988	940	887	582	633	832	1101	1523	761	913	785	819	288	508	1132
9130015G15Rik	3.73994	0.715164	4.17327e-05	44	79	6	13	6	5	5	7	5	0	0	0	0	0	2	0	1	0				Ston2	1.15775	0.269562	0.000270683	1717	1902	1362	1948	2024	1678	1413	1590	1348	1032	974	1093	1029	688	905	2383	1593	1508	2920	2780	1263
Heph	-4.79559	0.662963	4.22413e-05	144	209	231	350	15	16	4479	5191	5318	10192	9647	8848	6130	5282	6836	9696	8277	7415				Ttc7	-1.53165	0.354983	0.000271641	1429	1465	1338	1989	1856	1886	3954	4269	3852	5918	6036	6659	3010	3410	3921	3179	2756	2396	1823	1667	5052
Ric1	-1.25242	0.260973	4.23498e-05	1172	1217	1110	1042	1137	1059	2312	2450	2062	2917	3102	3138	2283	2090	2323	2483	2056	2037				Dmkn	4.98487	0.960685	0.000272101	1464	1942	834	200	146	221	3	16	4	3	18	5	14	0	8	0	9	19	2064	605	8
Duox2	3.78612	0.622172	4.26456e-05	18032	15882	10568	4173	5208	7560	270	359	371	1511	1337	962	760	618	1656	1950	2393	2882				Paxx	1.74222	0.416706	0.000274384	710	786	599	383	327	317	589	620	506	254	337	305	311	301	346	406	308	283	686	997	543
Gm7420	-3.30284	0.612682	4.26456e-05	2	1	2	4	3	0	37	32	36	15	15	29	25	51	28	26	17	19				Gen1	-1.31099	0.312059	0.000274507	228	279	332	416	447	418	592	563	479	443	499	574	606	810	413	760	661	668	277	484	589
Pcna	-1.36404	0.286737	4.26456e-05	645	835	894	1096	1236	1072	2171	2078	1942	1801	1906	1943	1984	2674	1689	2163	2339	2380				Palmd	4.37151	0.763091	0.000277116	1589	1277	1010	1297	3853	2077	0	4	0	8	14	5	42	27	12	7	2	0	193	178	0
Fam69b	1.08374	0.230352	4.27429e-05	249	201	186	205	216	215	120	161	110	89	109	95	188	173	184	409	407	381				9430069I07Rik	-4.59444	1.03783	0.000278174	0	0	0	4	0	1	1	0	0	7	8	11	3	13	1	0	0	0	0	0	30
Gm47813	-1.97174	0.409265	4.27552e-05	17	33	39	24	31	22	82	57	75	48	58	60	72	79	27	76	57	46				Zfp874a	1.43006	0.343474	0.00027869	490	516	386	320	384	414	412	395	478	210	183	220	272	262	371	454	338	293	459	526	278
G6pc	-8.96369	0.899154	4.28502e-05	0	0	0	0	1	0	330	503	399	3045	2803	2888	0	2	4	0	0	0				Epcam	-1.21103	0.278258	0.000279312	21924	21032	28840	26005	31831	30886	38711	43090	41414	40444	41327	43446	43651	42726	56748	61725	60744	57310	11282	19943	46828
Lamb2	3.0525	0.570461	4.29066e-05	7004	6850	7066	3671	4723	5503	1606	1775	1550	262	351	336	1433	1451	1513	1815	1491	1391				Dsg4	-3.99222	0.948361	0.000281232	0	0	0	1	2	0	0	9	6	32	15	19	16	14	7	83	29	25	0	0	17
Frs3	1.51707	0.333612	4.30117e-05	255	225	176	101	117	131	218	165	175	139	116	162	37	64	112	71	64	68				Kiss1r	1.78089	0.420569	0.000281856	72	83	58	35	37	46	44	43	29	25	35	33	33	29	44	111	68	74	147	98	67
Epor	6.11911	0.708247	4.32386e-05	115	102	135	183	150	150	0	1	0	2	0	1	0	1	1	1	0	1				Gm13502	-1.46231	0.34499	0.000283089	326	424	505	655	626	557	966	1011	783	1287	1254	1186	762	947	703	1234	1106	883	390	520	956
Flywch2	1.34092	0.28589	4.38192e-05	337	332	236	295	345	255	153	209	165	173	191	227	154	178	287	263	291	304				Lamb2	2.40433	0.594959	0.000283906	7004	6850	7066	3671	4723	5503	1606	1775	1550	262	351	336	1433	1451	1513	1815	1491	1391	4005	6297	1549
Cyp2c39	-5.69389	0.799574	4.38423e-05	0	0	0	0	0	0	37	41	35	32	38	42	1	0	4	11	8	3				Rgs11	2.08386	0.513826	0.000286285	4326	4308	2674	1440	1058	1478	2175	2191	1780	913	861	940	698	617	811	2129	1709	1731	2254	2929	1248
Sgcd	7.56662	0.794283	4.41309e-05	215	212	247	39	52	74	0	0	0	0	0	0	0	0	0	7	4	0				Artn	3.48472	0.671318	0.000287027	281	270	213	244	224	200	15	15	4	45	40	36	142	48	70	47	13	11	469	320	19
Kirrel	3.76566	0.523071	4.42149e-05	592	584	714	581	948	683	2	3	11	9	28	12	68	25	10	105	55	40				Tap2	1.24967	0.300421	0.000287027	1003	1006	762	654	799	853	357	431	494	504	417	474	529	431	752	686	771	817	569	596	478
Abca3	1.08906	0.228575	4.43165e-05	6016	6388	6901	5363	5993	6075	2308	2404	2281	2665	3003	3001	3731	3229	3246	4849	4124	4456				Gm3687	-1.48352	0.347945	0.000287746	132	116	142	161	244	184	132	211	184	186	240	274	227	270	201	360	320	308	114	122	277
AC154378.2	-1.51468	0.321016	4.43165e-05	58	65	55	67	66	49	90	67	94	104	124	121	102	100	56	132	101	83				1500011B03Rik	1.35052	0.319171	0.000288663	204	202	156	139	167	166	134	144	137	59	72	81	102	122	99	106	106	87	182	223	110
Insl3	4.19157	0.704009	4.43811e-05	24	20	46	9	4	12	1	3	4	0	0	1	1	2	6	4	6	7				Gm30262	-2.87462	0.735202	0.000291453	1	3	9	17	25	13	11	13	9	61	71	47	313	163	83	119	94	102	11	15	48
1810028F09Rik	-6.02638	0.83784	4.4661e-05	0	0	0	0	0	0	98	72	133	25	26	22	3	4	3	3	2	2				Ppp1r16b	-5.05554	0.906919	0.000293605	0	2	1	0	5	2	43	65	56	43	38	41	0	1	0	0	1	0	0	0	59
Sipa1	1.28459	0.268893	4.4763e-05	660	654	657	656	674	562	352	393	303	179	212	287	319	386	302	375	316	259				Tnfrsf18	2.95135	0.619624	0.000294495	62	82	51	86	111	136	29	37	55	22	29	22	51	55	33	30	39	12	62	59	1
Gm2996	-2.28412	0.441174	4.50043e-05	13	9	9	12	5	6	86	64	64	37	43	50	39	40	37	57	40	47				Tsc22d1	1.4028	0.327359	0.000294675	9094	9383	6740	5660	8997	7690	4491	5129	4779	6945	6792	6632	4767	4338	5968	5213	5000	5228	8670	10708	4916
Abhd4	1.25618	0.261697	4.55771e-05	5815	5313	5252	5350	6545	6353	2017	2149	1908	2502	2506	2318	3225	2286	2920	4648	3968	4230				A330023F24Rik	3.30772	0.749844	0.000296364	420	412	149	64	62	78	78	84	97	27	20	22	53	21	47	102	74	42	125	174	8
Slc17a9	2.68157	0.503535	4.59992e-05	900	956	424	394	282	319	108	88	52	69	92	66	1756	996	1129	4715	3957	4608				Spag5	-1.85568	0.429584	0.000297096	707	902	1396	1722	1380	1315	3156	3015	2708	1893	1987	2341	2809	3814	2033	2474	2070	2078	571	1507	3209
Neu3	-3.28727	0.529507	4.60398e-05	50	46	65	40	42	68	755	805	505	1346	1166	1546	19	15	55	16	15	15				4930447F24Rik	2.81101	0.704713	0.000297499	1034	759	1223	370	195	285	58	140	61	92	69	85	39	7	71	225	426	115	117	159	41
Pycrl	-1.09649	0.226325	4.60398e-05	639	633	543	529	724	572	2610	2622	2506	1515	1700	2131	605	978	1102	1107	1014	847				Hoxa4	-3.88919	0.770544	0.000298186	0	0	0	0	0	0	10	10	10	13	10	19	8	18	18	44	40	55	0	3	57
Trerf1	3.2698	0.61759	4.60398e-05	92	128	40	4	13	23	17	19	18	7	6	3	0	1	2	1	1	0				Plekho2	-2.55236	0.56519	0.000298896	51	32	56	33	55	49	74	90	66	190	175	172	33	36	33	39	43	17	21	39	217
Zc2hc1c	2.80844	0.491479	4.61051e-05	143	148	88	83	91	107	16	9	16	11	9	11	22	15	10	40	29	15				Cmtm8	2.99177	0.680013	0.000298913	1103	997	1140	885	941	1149	91	116	77	17	10	14	5	8	7	8	22	21	651	975	112
Hspb1	5.58868	0.82895	4.69346e-05	101	77	30	20	31	34	0	0	0	0	1	0	12	10	3	8	12	3				Rasd1	-3.12124	0.641952	0.000299757	10	2	32	9	10	9	39	35	41	31	41	26	45	60	92	295	384	241	6	3	108
Rab27b	1.73236	0.349483	4.69822e-05	4295	5278	2988	3731	3277	3087	1315	1416	1550	754	923	849	1895	1626	1318	1156	760	698				C87977	-4.33487	0.981491	0.000301184	0	0	0	0	0	0	13	18	14	199	235	256	12	12	11	5	6	5	0	0	52
Gm15544	-1.34023	0.288351	4.69936e-05	239	236	285	299	317	266	617	523	412	339	389	447	787	973	435	286	229	274				Slc27a1	1.23484	0.292731	0.000303412	2297	2271	2382	1849	1820	1844	1425	1363	1299	750	741	917	1168	1103	962	1206	934	875	1871	2314	1029
Zc2hc1a	1.78834	0.361479	4.70335e-05	443	413	447	370	508	464	183	139	195	109	98	76	189	151	156	276	190	186				Oas1f	-3.94944	0.800853	0.0003042	0	0	1	2	1	1	73	90	50	13	36	27	66	110	84	3	0	2	2	1	52
Stoml1	1.39551	0.29968	4.73116e-05	739	713	504	379	457	611	452	482	475	292	292	282	292	257	406	392	333	289				Ppargc1b	-1.10964	0.259447	0.000305952	191	224	213	158	164	174	667	594	649	563	539	615	310	394	324	815	707	685	233	330	910
Plekhg1	1.46146	0.324756	4.74774e-05	536	601	351	322	370	365	542	554	632	249	262	306	131	139	301	636	599	558				Mif	-1.21597	0.286947	0.000307728	1959	1885	2240	2581	2678	2498	2443	2550	1595	2606	2826	3029	1952	2036	1709	2883	2626	2497	1570	1925	3696
Natd1	1.11306	0.23847	4.79348e-05	702	710	831	655	863	754	546	518	562	336	430	423	432	329	513	660	597	599				Ezh2	-1.10613	0.261668	0.00030821	1505	1587	1905	2266	2416	1972	3264	3272	3158	2413	2526	2810	3104	4098	2829	3022	2770	2575	1425	2258	3386
Fam71e1	2.73684	0.606031	4.79723e-05	101	84	55	7	24	14	62	32	46	14	8	13	1	2	14	32	41	17				Cox7a1	-4.15037	0.803322	0.00031255	16	17	12	8	14	17	150	244	175	1266	1133	1124	38	58	231	365	354	184	3	4	302
Map3k13	-1.1907	0.248476	4.81064e-05	396	463	549	438	431	456	1198	1142	1287	1343	1277	1425	674	745	901	722	616	494				Elavl2	-2.671	0.768124	0.000315332	0	2	5	9	21	22	8	4	20	52	33	44	472	716	82	336	227	218	18	78	112
Slc37a4	-1.21838	0.254055	4.87429e-05	862	831	1171	922	973	1075	2411	2718	2517	2650	2814	3193	939	1089	1281	1571	1376	1412				Rhoq	1.70636	0.427528	0.000315658	1730	1703	2010	1358	1830	1830	1298	1296	1392	438	480	562	871	721	1527	1289	1554	1405	653	1472	864
Hspd1-ps3	-1.19657	0.25596	4.90272e-05	3952	3913	4931	6088	5979	5177	9054	9434	10652	7398	8112	9688	7736	10393	6449	8367	7145	6750				Tigit	4.29965	0.702547	0.000317324	1559	1071	1761	723	1204	1348	0	0	1	5	6	1	91	34	5	11	4	10	281	545	1
Cyp39a1	1.77905	0.382448	4.96357e-05	1568	1445	1112	970	1098	1006	1055	995	1068	394	407	451	614	593	957	694	761	675				Polk	1.03261	0.243416	0.00031758	1813	1671	2200	1810	1864	1896	617	648	563	528	553	518	1410	1046	953	1207	952	761	1688	1337	747
Slc2a5	-5.00705	0.651346	4.97835e-05	52	42	38	22	59	21	1054	1257	870	5860	4508	5520	26	47	134	15	29	49				Mt4	-4.06287	0.940339	0.00032071	0	0	0	0	0	0	0	0	0	3	5	2	1	1	0	61	40	32	0	0	7
Cgref1	-2.81645	0.500328	5.02214e-05	556	441	368	294	318	267	2045	2358	2049	5461	4706	5000	604	807	1016	622	610	642				4732419C18Rik	-2.29639	0.536595	0.000323338	12	19	17	13	10	18	146	103	69	97	129	149	35	15	17	6	10	6	21	7	70
Cish	2.17465	0.451416	5.06552e-05	1012	968	917	438	793	737	455	546	512	203	167	186	296	232	423	408	378	282				Gm21049	-4.54885	0.934439	0.000324254	0	0	0	0	0	0	15	14	22	21	18	16	0	1	0	0	0	0	0	0	6
Gm8291	1.66244	0.357293	5.08291e-05	54	69	55	52	37	45	36	44	44	23	25	24	26	33	50	33	26	29				Mtch2	-1.0966	0.259374	0.000326116	2261	2300	2164	2465	2788	2464	5229	5548	5022	6588	6686	7426	3220	3963	4139	4444	4395	3775	2346	2509	5737
Fam117b	-1.45179	0.301531	5.09279e-05	1417	1305	1564	1375	1446	1382	3226	3158	3054	4042	4241	4830	3436	4293	3737	4350	4434	5364				Tmprss13	4.24547	0.82306	0.000326412	110	101	46	36	28	39	0	3	2	0	1	0	15	7	5	40	14	3	139	136	1
Hmgn3	3.40472	0.577272	5.10535e-05	501	610	325	189	211	206	94	130	149	42	38	25	0	4	2	0	7	1				Eme1	-1.67964	0.398719	0.000327001	94	133	199	227	250	189	363	392	345	273	257	336	337	510	244	391	328	331	112	216	374
Gm379	4.05288	0.733096	5.18931e-05	17	20	15	13	19	11	0	0	0	0	3	0	12	9	12	42	33	19				4930431P19Rik	2.10136	0.489622	0.00032715	83	85	68	41	37	45	42	45	42	19	34	31	20	16	20	43	24	22	41	84	24
Gm7932	-4.81175	0.732459	5.19266e-05	0	0	3	0	1	1	116	96	115	30	36	51	8	22	18	47	34	11				Anapc15-ps	-1.0566	0.25444	0.00032715	102	93	113	114	135	104	134	140	128	161	162	173	164	198	123	175	165	157	101	133	144
Lancl3	2.6048	0.466594	5.19266e-05	280	303	388	321	653	355	33	54	59	14	27	35	233	165	107	59	29	37				B930095G15Rik	-1.38506	0.314879	0.00032715	236	215	282	224	222	213	816	815	764	359	364	486	528	590	714	479	423	357	153	153	679
Cyp2c67	-6.50371	0.849213	5.24339e-05	0	0	0	0	0	0	110	174	154	176	194	222	4	0	37	34	49	7				Slc9a3	-4.36497	0.842737	0.00032715	1558	2297	1025	6325	5348	1831	1215	1372	1841	9473	8714	9044	56	73	232	1017	1354	2303	24	61	2398
Nedd4	1.05703	0.227263	5.24952e-05	46142	43398	51903	42998	50214	51226	32485	34905	35475	19730	22141	24581	29907	31804	32288	39340	32975	31921				Suv39h2	-1.68102	0.401106	0.00032715	124	123	223	303	330	290	360	350	440	319	357	481	471	557	341	485	393	408	163	242	428
1700088E04Rik	2.08788	0.409907	5.28479e-05	220	189	161	124	130	124	42	32	24	44	41	40	55	31	44	81	62	66				Aurka	-1.91394	0.460698	0.000328693	463	652	1197	1607	1490	1173	1367	1458	1244	1409	1637	1912	2108	2846	1235	2053	1658	1821	515	1185	2019
Tubb4a	2.26411	0.433015	5.29181e-05	221	168	151	131	126	176	37	39	20	22	40	30	68	28	46	30	25	25				Cyp2c29	-5.26508	1.02263	0.000328811	0	7	0	0	0	0	2635	2482	2089	1023	873	981	7	215	162	0	0	0	0	0	240
B3galt5	-2.20393	0.423383	5.30645e-05	5	20	9	6	5	4	51	69	49	50	46	74	41	45	59	18545	15700	12220				Ceacam12	-4.72488	0.950775	0.000329819	0	0	0	0	0	0	6	6	10	5	6	11	6	4	3	30	36	32	0	0	3
Pcna-ps2	-1.33434	0.284814	5.31919e-05	888	1047	1163	1464	1637	1429	2509	2475	2408	2257	2364	2598	2574	3591	2167	2903	3229	3037				Pik3ip1	3.37155	0.836716	0.000331325	426	288	410	139	281	351	124	177	192	8	4	6	38	33	62	27	42	31	96	172	10
AI481877	2.51945	0.456705	5.32131e-05	333	296	465	272	274	277	36	43	35	24	23	28	155	47	46	423	318	278				Prrx2	4.4298	0.913314	0.000332149	120	112	289	36	103	258	2	0	0	0	0	1	0	0	1	0	0	0	24	42	0
Sgsm2	1.33602	0.285968	5.33015e-05	2198	2291	1634	1374	1829	1910	1372	1358	1233	722	789	816	1063	983	1178	1726	1314	1198				Tmem136	4.53494	0.923517	0.000333825	78	55	41	12	20	31	15	28	16	1	2	2	20	27	8	5	1	0	25	125	1
Fbln2	5.37804	0.625763	5.37217e-05	6317	3980	7880	7016	18385	18195	45	51	57	33	32	30	708	158	35	24	65	4				Ccdc103	2.48764	0.547676	0.00033532	86	78	59	41	53	85	11	8	14	9	4	10	6	13	8	15	15	14	34	76	8
Gal3st2c	-5.60586	0.80503	5.37296e-05	0	0	0	0	2	0	66	75	58	127	111	125	4	4	27	17	14	3				Cyp4f17	1.55127	0.364549	0.00033532	390	383	256	167	230	240	151	144	102	148	151	131	115	100	135	64	65	56	256	296	122
Dnah9	2.95001	0.622735	5.37905e-05	172	74	74	19	51	66	51	53	63	8	9	21	0	5	14	1	7	0				Cysrt1	3.44895	0.644356	0.000336091	404	487	413	645	597	527	3	8	3	23	40	28	145	59	45	97	39	34	855	659	23
Ifit2	-2.76285	0.520263	5.39575e-05	6	17	12	20	34	9	127	104	115	93	84	109	112	208	108	248	348	514				Rdh12	3.84691	0.76087	0.000336091	7	12	3	7	3	4	9	10	2	12	11	0	11	6	12	7	4	6	94	63	6
6430562O15Rik	5.81279	0.754175	5.41314e-05	61	65	31	9	25	32	1	1	0	0	0	0	1	0	0	2	1	2				Map3k5	1.18245	0.279856	0.00033785	2627	2562	2115	1444	1647	1541	898	933	987	732	733	818	1375	1375	1105	1621	1174	1363	1993	2022	792
Zfp354b	2.94274	0.616342	5.44946e-05	28	26	10	4	6	14	16	6	11	3	2	5	0	1	10	5	3	1				Ttc25	2.39746	0.672678	0.000338173	114	77	135	42	50	50	124	165	293	26	30	43	30	19	102	45	54	45	35	102	56
Ceacam2	-1.78165	0.363089	5.47504e-05	36	31	48	54	55	56	156	143	141	156	185	153	575	523	569	929	873	1377				Scarb2	1.06496	0.252668	0.000339902	8284	8578	8406	7147	6293	6734	3091	3486	3423	4095	4185	4425	3981	3407	3795	7719	6571	6502	8487	9641	4683
Fkbp5	-2.93858	0.563029	5.4828e-05	78	118	138	241	313	199	341	389	404	1084	1379	1165	2575	2425	1503	2178	2728	3283				Slc1a3	3.57651	0.945991	0.000339902	1284	1310	970	346	451	972	1209	1295	1168	18	10	27	0	0	2	1	2	0	838	863	28
Pisd	-1.11837	0.235251	5.5056e-05	765	733	562	582	591	667	1619	1721	1708	1879	1939	1988	1050	1505	1553	1268	1130	1001				Frs3	1.38724	0.34784	0.000341919	255	225	176	101	117	131	218	165	175	139	116	162	37	64	112	71	64	68	118	242	197
Bmp6	2.89912	0.551131	5.51439e-05	74	51	109	31	61	104	20	14	20	8	18	15	32	24	75	22	12	6				Smarca5-ps	-1.0292	0.24782	0.000342837	173	150	175	195	181	189	202	264	276	230	202	285	259	361	216	350	266	268	173	175	231
Lrtm2	3.92442	0.635239	5.5186e-05	47	43	23	34	33	27	0	3	7	0	1	1	5	4	4	9	9	5				Gm37261	2.66752	0.583864	0.000347467	664	734	376	179	133	166	323	332	255	204	287	318	236	247	207	282	175	172	529	671	88
Tns1	5.1901	0.730287	5.68825e-05	698	561	278	27	40	53	9	10	9	6	4	2	7	0	9	1	6	0				Pisd-ps1	1.79486	0.430453	0.000348675	2294	2255	1342	888	1012	1583	864	869	781	465	453	499	838	591	655	1013	791	604	1023	1037	504
Wdcp	1.11794	0.245041	5.75721e-05	243	226	245	209	210	273	209	224	216	113	153	201	105	138	187	196	188	183				Gmnn	-1.44252	0.344324	0.000349618	410	447	573	880	755	680	798	1029	905	863	954	1133	1015	1356	894	1125	943	939	363	636	969
Phldb1	1.64844	0.359403	5.76015e-05	3603	4037	2388	1489	2005	2053	2191	2223	2144	1037	1256	1633	497	588	908	2446	1894	1456				Adcy3	2.1552	0.539245	0.000350409	530	401	160	138	267	154	30	37	20	27	25	30	6	19	31	1	0	1	138	116	63
4921507P07Rik	2.15022	0.448494	5.77779e-05	133	149	82	85	87	107	53	69	75	31	19	26	47	36	66	53	45	42				Pcdhga12	4.73591	0.929797	0.000351916	42	50	13	26	11	78	10	8	5	9	3	3	1	0	2	38	16	1	12	136	2
Phlpp2	-2.40926	0.472593	5.85725e-05	298	312	327	334	374	351	650	820	852	2008	1863	1838	617	746	579	1566	1053	971				Myo9a	1.06399	0.254616	0.000351942	693	709	551	475	502	500	396	444	485	291	341	377	508	387	408	704	501	529	552	775	378
Usp2	-1.80314	0.349011	5.87907e-05	30	27	31	24	25	35	340	346	222	235	210	167	59	92	170	42	42	46				Slc23a2	-2.2385	0.534257	0.000353794	597	562	479	576	606	444	1096	1148	1136	3505	3252	3378	2500	1715	1319	4235	5360	6841	606	603	2278
Ifrd1	-1.78369	0.38507	5.89322e-05	1283	1176	1018	1688	1356	983	1254	1345	1268	2265	2959	2349	4879	3473	1846	4594	3622	2861				Map9	2.23323	0.652173	0.000355133	205	126	154	37	59	50	22	40	36	12	9	10	7	11	36	17	51	59	170	76	45
Rnf169	1.23398	0.26071	5.9602e-05	2004	1689	2032	1536	2026	1996	854	881	998	541	644	600	1448	1281	1055	1139	985	832				Trim21	1.1583	0.282255	0.000356379	277	315	195	192	225	222	303	359	358	175	195	208	275	280	343	382	323	389	300	318	266
Gm44223	-3.94796	0.573991	5.97907e-05	14	7	10	3	7	6	945	946	968	198	210	327	30	23	111	86	90	47				Rnasel	-2.18326	0.483588	0.000359624	927	1020	955	1399	817	962	3711	4089	3201	6901	7192	6846	6155	4457	8955	14908	19841	21554	678	1024	5985
Arhgap19	-1.48136	0.321077	6.05939e-05	424	384	570	846	744	617	1064	1018	954	927	1028	1165	1387	1782	936	964	771	876				Cyp2j6	-2.57785	0.556484	0.000362674	2744	2965	1908	2218	2359	2535	7894	9229	8952	22897	20946	21138	2060	2336	4756	4486	4642	5320	2934	2008	17201
Arl4a	-2.16922	0.423913	6.07673e-05	222	196	153	245	254	237	721	783	662	1257	1382	1371	1193	1196	1575	1940	1999	1919				Trim23	1.00645	0.241419	0.000362836	770	661	651	581	567	622	446	455	511	312	302	318	609	549	507	528	400	362	628	730	358
Faap24	-1.38706	0.306878	6.13137e-05	175	205	204	322	368	244	293	309	252	310	357	359	439	572	228	469	407	415				Ivl	5.08759	0.863607	0.00036465	403	415	177	563	1734	2383	1	0	1	8	12	9	143	50	52	20	13	2	1380	730	7
Vnn3	3.09059	0.712649	6.13137e-05	53	55	26	1	3	1	15	17	10	3	5	3	0	2	29	0	0	0				4930558J18Rik	-2.33512	0.557558	0.000364886	4	9	20	20	11	15	21	24	18	24	35	35	43	39	20	39	29	40	4	17	35
Cped1	-4.98894	0.828627	6.14904e-05	0	0	1	0	0	0	78	83	71	45	49	29	84	83	274	1	5	24				Pdcd4	1.46098	0.374022	0.00036545	4361	4996	3321	2083	1966	2687	9991	10316	9877	3815	4021	5064	1072	1290	3546	2438	2403	1552	6037	4892	6305
Idua	1.20122	0.263297	6.18854e-05	565	573	536	334	388	450	455	402	394	256	286	295	296	254	385	421	427	436				Cyp4x1	4.15884	0.940286	0.000367978	16	12	3	3	0	5	0	0	0	0	0	0	3	3	13	1	1	1	17	30	1
Peli1	-2.09172	0.423495	6.26296e-05	465	479	355	427	703	352	984	1030	1051	2027	2012	1853	1527	1300	1214	1624	1441	1356				Cd99l2	1.62442	0.388629	0.000368935	2504	2255	2292	2402	3215	3018	1166	1126	1068	433	512	567	1268	1122	1104	1101	881	919	2176	2209	1021
Irx3	5.72621	0.701563	6.26377e-05	245	294	463	159	278	925	0	1	1	4	2	4	30	4	7	55	62	213				Sis	-5.95899	0.968174	0.000371978	0	0	0	0	0	0	28212	38906	49044	295529	260227	260142	428	2280	44945	6	59	25	16	54	70765
Acsl1	-1.42144	0.294536	6.27511e-05	1536	1513	1432	830	969	889	4411	4474	4864	3461	3754	4018	1643	2014	1769	2142	1657	1320				Abcg5	-5.34484	0.889026	0.00037212	25	32	3	5	0	0	4188	4330	4240	8162	7995	8793	147	527	2409	2	11	9	10	11	5308
Depp1	4.00299	0.667756	6.28781e-05	5900	6306	2253	1748	1255	1202	422	582	353	45	74	49	168	49	185	253	143	106				Plk4	-1.72461	0.420029	0.000372263	341	434	644	929	844	747	1221	1035	1175	979	1028	1171	1648	2302	969	1236	1028	1010	354	875	1166
Oxr1	1.51719	0.317422	6.34048e-05	5534	5069	4986	3922	4494	4469	1970	2268	2242	1180	1133	1377	2242	1795	1557	4747	3769	3024				Osmr	6.80778	0.916522	0.000372819	2842	2195	2095	1347	1901	2251	0	0	0	0	3	1	14	6	0	11	86	191	1312	1967	1
Cxcl15	6.90712	0.791788	6.34212e-05	144	81	106	18	28	44	0	0	0	0	0	0	0	2	0	1	0	1				Fam198b	3.261	0.586625	0.000375332	367	298	723	453	1031	1212	12	8	5	7	18	15	89	40	12	14	11	7	660	633	18
Vwa5a	2.07958	0.441354	6.34427e-05	2866	2800	2642	1673	1456	2099	1307	1499	1553	532	532	602	1111	742	1414	3164	3167	3045				Arhgef25	2.90425	0.65764	0.000376829	526	341	198	112	217	258	1	9	4	2	3	4	36	20	13	7	7	10	139	187	20
Atxn10	1.54491	0.321148	6.36139e-05	4910	4485	4898	3926	4859	4633	1928	2183	1964	972	1204	1142	2553	2053	1802	2399	1891	1610				Atp2a3	1.24661	0.324701	0.000378679	3531	4469	3203	2746	2127	1977	5535	5075	4969	2403	2728	2730	2558	2642	8848	13071	9386	8258	3537	3870	7573
Eml6	1.87362	0.388951	6.41627e-05	256	239	169	124	148	129	56	87	83	42	68	55	49	52	50	138	170	120				Gabbr1	2.14897	0.505007	0.000378835	3421	3443	2170	1654	1525	1870	1352	1343	1317	445	560	582	1460	1052	802	1267	927	743	3181	3597	1048
4930447F24Rik	3.52132	0.62043	6.45431e-05	1034	759	1223	370	195	285	58	140	61	92	69	85	39	7	71	225	426	115				Hcn2	1.41197	0.346213	0.000379165	759	818	991	915	734	900	333	416	311	391	391	401	284	198	500	743	801	775	561	786	439
Rcc1	-1.44929	0.318187	6.51828e-05	1061	1145	1320	2048	2477	1773	2282	2239	2300	2191	2552	2883	3647	4327	2203	2922	2427	2374				Zfp14	1.82664	0.448313	0.000380941	122	139	76	37	69	68	38	48	52	35	39	39	38	25	58	57	63	66	78	78	37
Lca5	1.6772	0.347132	6.52364e-05	399	408	404	249	277	227	114	147	124	85	104	100	83	60	61	336	265	287				Baiap2	1.18076	0.274925	0.000381347	2238	2361	1862	1746	1872	1939	667	665	743	473	619	470	1626	1639	718	1544	1106	1048	2638	2322	732
Lipg	-2.56601	0.50223	6.56066e-05	81	85	186	241	264	189	1417	1227	827	529	621	771	370	555	287	551	503	469				Ctso	1.1982	0.291915	0.000381347	876	835	586	507	474	535	421	613	655	557	492	535	415	371	596	698	690	795	670	701	483
Mcm10	-1.73549	0.368002	6.5661e-05	447	569	723	1090	917	914	2195	2134	2087	1460	1533	1925	2566	3463	1854	1605	1439	1643				Ccna2	-2.01066	0.47698	0.000382937	1257	1873	3468	4744	3776	3244	6638	6071	5794	5217	5824	6625	6942	9501	4994	7736	6188	6731	1378	3688	7732
Zfp92	-3.61823	0.581736	6.59383e-05	9	16	4	13	11	9	111	91	96	283	212	202	9	13	17	49	50	41				Dera	-1.33421	0.322988	0.000382937	855	878	1022	1390	1419	1213	1906	1995	1816	2695	2848	2950	1669	1916	1550	1742	1641	1541	1216	1299	2224
Mlkl	1.28151	0.268732	6.64432e-05	894	1004	928	1496	1390	1025	354	348	303	274	351	375	1092	851	750	1951	1728	1852				Pxmp2	-1.62157	0.384745	0.000383979	88	89	57	86	139	105	173	261	190	137	118	185	226	247	146	153	162	155	46	75	188
Rnf130	2.67793	0.586141	6.67274e-05	1528	1665	1571	1224	1585	1403	828	1153	1104	134	160	138	146	204	507	2201	2248	1702				Tmem120b	1.36767	0.326102	0.000385766	178	123	124	111	146	137	98	102	86	60	87	67	56	45	64	61	50	48	203	136	98
Lypla1	-1.37938	0.290208	6.70123e-05	1484	1483	1276	1653	1797	1712	3687	3848	3659	4929	4862	5141	2471	2823	3203	3951	3518	3409				Faah	-1.48482	0.346687	0.000387152	1211	1356	1297	1200	1252	1075	2503	2592	2435	3207	3577	4307	1322	2012	2262	1668	1550	1583	1190	1584	3972
[truncated: 2,493 more rows]
[truncated: 3 more columns]

## Sheet: adult vs embr mouse non-DEG
MOUSE
DEG = Differentially expressed genes
[truncated: 16,804 more rows]
[truncated: 3 more columns]

## Sheet: genes not expressed
Gene	Corp_org_1	Corp_org_2	Corp_org_3	Pyl_org_1	Pyl_org_2	Pyl_org_3	Duod_org_1	Duod_org_2	Duod_org_3	Jej_org_1	Jej_org_2	Jej_org_3	Ileum_org_1	Ileum_org_2	Ileum_org_3	Colon_org_1	Colon_org_2	Colon_org_3	Embr_sto_org_1	Embr_sto_org_2	Embr_prox_int_org_1	Embr_prox_int_org_2	Embr_prox_int_org_3
[truncated: 33,659 more rows]
